# Supplementary material for: Differential Evolutionary Constraints in the Evolution of Chemoreceptors: A Murine and Human Case Study
Source: ScientificWorldJournal. 2014 Jan 23;2014:696485. doi: 10.1155/2014/696485 (PMC3920627; doi:10.1155/2014/696485)
Supplement: Supplementary file 1 — This supplementary material contains: 1) A summary of all genes used in our analyses, with their respective orthology and topology information 2) The tree files used to generate Figure 6 Please refer to the readme file further information. [file 696485.f1.zip]

Archive with 6 entries (6 files):
- OR_tree.mts
- T1R_tree.mts
- T2R_tree.mts
- VN_tree.mts
- Supplementary 1 - Genes.xlsx
- Supplementary readme.txt
