# Supplementary material for: Differential Evolutionary Constraints in the Evolution of Chemoreceptors: A Murine and Human Case Study
Source: ScientificWorldJournal. 2014 Jan 23;2014:696485. doi: 10.1155/2014/696485 (PMC3920627; doi:10.1155/2014/696485)
Supplement: Supplementary file 1 — This supplementary material contains: 1) A summary of all genes used in our analyses, with their respective orthology and topology information 2) The tree files used to generate Figure 6 Please refer to the readme file further information. [file 696485.f1.zip › Supplementary 1 - Genes.xlsx]

## Sheet: ALL
String Name	String ID	String description	k(i)	C(i)	<k(i)>v	<C(i)>v	NOG	NOG Descr	KOG	KOG Descr	COG	COG Descr	n_prot	n_species	Abundance	Diversity	Conservability	EPI	species
TAS1R1	9606.ENSP00000331867	TS1	1	0.0000	30000	0.3333	-	-	KOG1056	Taste receptor type 1 member 1 precursor (G-protein coupled receptor 70); Putative taste rec [...]	-	-	1397	34	41.0882	0.67551	0.105384	0.894616	homo
TAS1R2	9606.ENSP00000364520	TS1	2	10000	680000	0.2543	-	-	KOG1056	Taste receptor type 1 member 2 precursor (G-protein coupled receptor 71) (Sweet taste recept [...]	-	-	1397	34	41.0882	0.67551	0.105384	0.894616	homo
TAS1R3	9606.ENSP00000344411	TS1	3	0.3333	453333	0.3918	-	-	KOG1056	Taste receptor type 1 member 3 precursor (Sweet taste receptor T1R3); Putative taste recepto [...]	-	-	1397	34	41.0882	0.67551	0.105384	0.894616	homo
TAS2R1	9606.ENSP00000304138	TS2	0	0	0	0	NOG48043	Taste receptor type 2 member 1 (T2R1) (Taste receptor family B member 7) (TRB7); Receptor th [...]	-	-	-	-	14	14	1	0.40943	0.40943	0.59057	homo
TAS2R10	9606.ENSP00000240619	TS2	0	0	0	0	NOG46344	Taste receptor type 2 member 10 (T2R10) (Taste receptor family B member 2) (TRB2); Gustducin [...]	-	-	-	-	25	13	1.92308	0.3692	0.266234	0.733766	homo
TAS2R13	9606.ENSP00000375095	TS2	0	0	0	0	NOG42620	Taste receptor type 2 member 13 (T2R13) (Taste receptor family B member 3) (TRB3); Receptor [...]	-	-	-	-	5	5	1	0.24969	0.24969	0.75031	homo
TAS2R14	9606.ENSP00000375094	TS2	0	0	0	0	NOG46292	Taste receptor type 2 member 14 (T2R14) (Taste receptor family B member 1) (TRB1); Receptor [...]	-	-	-	-	15	5	3	0.16764	0.096787	0.903213	homo
TAS2R16	9606.ENSP00000249284	TS2	0	0	0	0	NOG39234	Taste receptor type 2 member 16 (T2R16); Gustducin-coupled receptor implicated in the percep [...]	-	-	-	-	15	12	1.25	0.37712	0.337306	0.662694	homo
TAS2R48	9606.ENSP00000375091	TS2	0	0	0	0	NOG130344	Taste receptor type 2 member 48 (T2R48); Receptor that may play a role in the perception of [...]	-	-	-	-	4	3	1.33333	0.1613	0.13969	0.86031	homo
TAS2R49	9606.ENSP00000375092	TS2	0	0	0	0	NOG43462	Taste receptor type 2 member 49 (T2R49) (T2R56); Receptor that may play a role in the percep [...]	-	-	-	-	19	7	2.71429	0.26508	0.160897	0.839103	homo
TAS2R3	9606.ENSP00000247879	TS2	0	0	0	0	NOG27838	Taste receptor type 2 member 3 (T2R3); Gustducin-coupled receptor implicated in the percepti [...]	-	-	-	-	15	15	1	0.42013	0.42013	0.57987	homo
TAS2R38	9606.ENSP00000331291	TS2	0	0	0	0	NOG43295	Taste receptor type 2 member 38 (T2R38) (T2R61) (PTC bitter taste receptor); Receptor that m [...]	-	-	-	-	18	16	1.125	0.42001	0.395989	0.604011	homo
TAS2R4	9606.ENSP00000247881	TS2	0	0	0	0	NOG42218	Taste receptor type 2 member 4 (T2R4); Gustducin-coupled receptor for denatonium and N(6)- p [...]	-	-	-	-	15	15	1	0.42013	0.42013	0.57987	homo
TAS2R42	9606.ENSP00000334050	TS2	0	0	0	0	NOG43990	Taste receptor type 2 member 42 (T2R42) (T2R55); Receptor that may play a role in the percep [...]	-	-	-	-	9	9	1	0.34088	0.34088	0.65912	homo
TAS2R5	9606.ENSP00000247883	TS2	0	0	0	0	NOG133822	Taste receptor type 2 member 5 (T2R5); Receptor that may play a role in the perception of bi [...]	-	-	-	-	9	9	1	0.34088	0.34088	0.65912	homo
TAS2R50	9606.ENSP00000375093	TS2	0	0	0	0	NOG74690	Taste receptor type 2 member 50 (T2R50) (T2R51); Receptor that may play a role in the percep [...]	-	-	-	-	3	3	1	0.17044	0.17044	0.82956	homo
TAS2R60	9606.ENSP00000327724	TS2	0	0	0	0	NOG45884	Taste receptor type 2 member 60 (T2R60) (T2R56); Receptor that may play a role in the percep [...]	-	-	-	-	10	10	1	0.35723	0.35723	0.64277	homo
TAS2R7	9606.ENSP00000240687	TS2	0	0	0	0	NOG45213	Taste receptor type 2 member 7 (T2R7) (Taste receptor family B member 4) (TRB4); Gustducin-c [...]	-	-	-	-	25	15	1.66667	0.40036	0.310117	0.689883	homo
TAS2R8	9606.ENSP00000240615	TS2	0	0	0	0	NOG45213	Taste receptor type 2 member 8 (T2R8) (Taste receptor family B member 5) (TRB5); Receptor th [...]	-	-	-	-	25	15	1.66667	0.40036	0.310117	0.689883	homo
TAS2R9	9606.ENSP00000240691	TS2	0	0	0	0	NOG45213	Taste receptor type 2 member 9 (T2R9) (Taste receptor family B member 6) (TRB6); Gustducin-c [...]	-	-	-	-	25	15	1.66667	0.40036	0.310117	0.689883	homo
PLCB2	9606.ENSP00000260402	TS-AC	109	0.2477	695872	0.4577	-	-	KOG1265	1-phosphatidylinositol-4,5-bisphosphate phosphodiesterase beta 2 (EC 3.1.4.11) (Phosphoinosi [...]	-	-	135	35	3.85714	0.86868	0.44231	0.55769	homo
SCNN1A	9606.ENSP00000353292	TS-AC	6	0.6000	476667	0.4372	-	-	KOG4294	Amiloride-sensitive sodium channel subunit alpha (Epithelial Na(+) channel subunit alpha) (A [...]	-	-	329	34	9.67647	0.82691	0.265827	0.734173	homo
SCNN1B	9606.ENSP00000302874	TS-AC	6	0.6000	518333	0.4353	-	-	KOG4294	Amiloride-sensitive sodium channel subunit beta (Epithelial Na(+) channel subunit beta) (Bet [...]	-	-	329	34	9.67647	0.82691	0.265827	0.734173	homo
SCNN1D	9606.ENSP00000368393	TS-AC	0	0	0	0	-	-	KOG4294	Amiloride-sensitive sodium channel subunit delta (Epithelial Na(+) channel subunit delta) (D [...]	-	-	329	34	9.67647	0.82691	0.265827	0.734173	homo
SCNN1G	9606.ENSP00000300061	TS-AC	5	0.8000	526000	0.3803	-	-	KOG4294	Amiloride-sensitive sodium channel subunit gamma (Epithelial Na(+) channel subunit gamma) (G [...]	-	-	329	34	9.67647	0.82691	0.265827	0.734173	homo
GNG13	9606.ENSP00000248150	TS-AC	26	0.9354	843462	0.5862	-	-	KOG4119	Guanine nucleotide-binding protein G(I)/G(S)/G(O) gamma-13 subunit precursor; Guanine nucleo [...]	-	-	276	33	8.36364	0.83864	0.289987	0.710013	homo
GNB1	9606.ENSP00000367872	TS-AC	457	0.4132	2077090	0.7890	-	-	KOG0286	Guanine nucleotide-binding protein G(I)/G(S)/G(T) subunit beta 1 (Transducin beta chain 1); [...]	COG2319	Guanine nucleotide-binding protein G(I)/G(S)/G(T) subunit beta 1 (Transducin beta chain 1); [...]	191	49	3.89796	0.91809	0.465015	0.534985	homo
GNAT1	9606.ENSP00000232461	TS-AC	29	0.3473	633448	0.6119	-	-	KOG0082	Guanine nucleotide-binding protein G(t), alpha-1 subunit (Transducin alpha-1 chain); Guanine [...]	-	-	362	49	7.38775	0.92493	0.340293	0.659707	homo
ITPR3	9606.ENSP00000363435	TS-AC	40	0.4000	653000	0.3764	-	-	KOG3533	Inositol 1,4,5-trisphosphate receptor type 3 (Type 3 inositol 1,4,5- trisphosphate receptor) [...]	-	-	98	36	2.72222	0.86449	0.52396	0.47604	homo
LCN1	9606.ENSP00000360846	TS-AC	0	0	0	0	NOG29410	Lipocalin-1 precursor (Von Ebner gland protein) (VEG protein) (Tear prealbumin) (TP) (Tear l [...]	-	-	-	-	31	18	1.72222	0.41787	0.318417	0.681583	homo
NPY	9606.ENSP00000242152	TS-AC	13	0.4744	188462	0.6260	NOG45909	Neuropeptide Y precursor [Contains: Neuropeptide Y (Neuropeptide tyrosine) (NPY); C-flanking [...]	-	-	-	-	29	25	1.16	0.49274	0.457498	0.542502	homo
P2RX3	9606.ENSP00000263314	TS-AC	14	10000	259286	0.6339	NOG40178	P2X purinoceptor 3 (ATP receptor) (P2X3) (Purinergic receptor); Receptor for ATP that acts a [...]	-	-	-	-	30	25	1.2	0.48912	0.446503	0.553497	homo
RTP3	9606.ENSP00000296142	TS-AC	0	0	0	0	NOG43194	Receptor-transporting protein 3 (Transmembrane protein 7)	-	-	-	-	19	18	1.05556	0.44549	0.433607	0.566393	homo
RTP4	9606.ENSP00000259030	TS-AC	0	0	0	0	NOG42817	Receptor-transporting protein 4 (28 kDa interferon-responsive protein)	-	-	-	-	19	18	1.05556	0.44549	0.433607	0.566393	homo
VN1R4	9606.ENSP00000310856	VN	0	0	0	0	NOG78462	Vomeronasal type-1 receptor 4 (V1r-like receptor 4) (hGPCR27); Putative pheromone receptor	-	-	-	-	105	22	4.77273	0.39563	0.181095	0.818905	homo
VN1R1	9606.ENSP00000322339	VN	0	0	0	0	NOG113005	Vomeronasal type-1 receptor 1 (V1r-like receptor 1) (Vomeronasal olfactory receptor chromoso [...]	-	-	-	-	111	11	10.0909	0.21194	0.0667187	0.933281	homo
VN1R2	9606.ENSP00000351244	VN	0	0	0	0	NOG86358	Vomeronasal type-1 receptor 2 (V1r-like receptor 2) (hGPCR25); Putative pheromone receptor	-	-	-	-	29	4	7.25	0.08449	0.0313788	0.968621	homo
OR10A2	9606.ENSP00000303862	OL	287	1	2879756	0.996	NOG148577	Olfactory receptor 10A2 (Olfactory receptor OR11-86) (HP4); Odorant receptor (Potential)	-	-	-	-			1.76471	0.42013	0.316262	0.683738	homo
OR10A3	9606.ENSP00000353988	OL	287	1	2879756	0.996	NOG150795	Olfactory receptor 10A3 (Olfactory receptor OR11-97) (HTPCRX12); Odorant receptor (Potential)	-	-	-	-			2.47368	0.41471	0.263677	0.736323	homo
OR10A4	9606.ENSP00000369157	OL	287	1	2879756	0.996	NOG38940	Olfactory receptor 10A4 (HP2) (Olfactory receptor-like protein JCG5); Odorant receptor (Pote [...]	-	-	-	-			1.5	0.37655	0.307452	0.692548	homo
OR10A5	9606.ENSP00000369159	OL	287	1	2879756	0.996	NOG148577	Olfactory receptor 10A5 (HP3) (Olfactory receptor-like protein JCG6); Odorant receptor (Pote [...]	-	-	-	-			1.76471	0.42013	0.316262	0.683738	homo
OR10A6	9606.ENSP00000312470	OL	287	1	2879756	0.996	NOG150795	Olfactory receptor 10A6 (Olfactory receptor OR11-96); Odorant receptor (Potential)	-	-	-	-			2.47368	0.41471	0.263677	0.736323	homo
OR10A7	9606.ENSP00000326718	OL	287	1	2879756	0.996	NOG148471	Olfactory receptor 10A7 (Olfactory receptor OR12-6); Odorant receptor (Potential)	-	-	-	-			1.16667	0.3729	0.345238	0.654762	homo
OR10AC1P	9606.ENSP00000321222	OL	0	0	0	0	NOG39464	Seven transmembrane helix receptor; Putative odorant receptor (By similarity)	-	-	-	-			1	0.42013	0.42013	0.57987	homo
OR10AD1	9606.ENSP00000308689	OL	287	1	2879756	0.996	NOG45259	Olfactory receptor 10AD1 (Olfactory receptor OR12-1); Odorant receptor (Potential)	-	-	-	-			1.64286	0.3917	0.3056	0.6944	homo
OR10AG1	9606.ENSP00000311477	OL	287	1	2879756	0.996	NOG74490	Olfactory receptor 10AG1 (Olfactory receptor OR11-160); Odorant receptor (Potential)	-	-	-	-			4.10526	0.40882	0.201772	0.798228	homo
OR10D3P	9606.ENSP00000323895	OL	0	0	0	0	NOG115464	Seven transmembrane helix receptor (Olfactory receptor OR11-293); Odorant receptor (Potential)	-	-	-	-			1.09091	0.36759	0.35194	0.64806	homo
OR10D4P	9606.ENSP00000333960	OL	0	0	0	0	NOG43587	Olfactory receptor 10D4; Odorant receptor (Potential)	-	-	-	-			2.07692	0.34389	0.238622	0.761378	homo
OR10G2	9606.ENSP00000308821	OL	287	1	2879756	0.996	NOG147514	Olfactory receptor 10G2; Odorant receptor (Potential)	-	-	-	-			1.3	0.3483	0.305479	0.694521	homo
OR10G3	9606.ENSP00000302437	OL	287	1	2879756	0.996	NOG44637	Olfactory receptor 10G3 (Olfactory receptor OR14-40); Odorant receptor (Potential)	-	-	-	-			1.25	0.37712	0.337306	0.662694	homo
OR10G6	9606.ENSP00000303817	OL	287	1	2879756	0.996	NOG68506	Olfactory receptor 10G6 (Olfactory receptor OR11-280); Odorant receptor (Potential)	-	-	-	-			1	0.39793	0.39793	0.60207	homo
OR10G7	9606.ENSP00000329689	OL	287	1	2879756	0.996	NOG41301	Olfactory receptor 10G7; Odorant receptor (Potential)	-	-	-	-			2.84615	0.37586	0.222791	0.777209	homo
OR10H1	9606.ENSP00000335596	OL	287	1	2879756	0.996	NOG79272	Olfactory receptor 10H1; Odorant receptor (Potential)	-	-	-	-			2.46667	0.39704	0.252801	0.747199	homo
OR10H2	9606.ENSP00000306095	OL	287	1	2879756	0.996	NOG79272	Olfactory receptor 10H2 (Olfactory receptor OR19-23); Odorant receptor (Potential)	-	-	-	-			2.46667	0.39704	0.252801	0.747199	homo
OR10H3	9606.ENSP00000307130	OL	287	1	2879756	0.996	NOG42955	Olfactory receptor 10H3; Odorant receptor (Potential)	-	-	-	-			2.33333	0.30711	0.201051	0.798949	homo
OR10H4	9606.ENSP00000318834	OL	287	1	2879756	0.996	NOG42955	Olfactory receptor 10H4; Odorant receptor (Potential)	-	-	-	-			2.33333	0.30711	0.201051	0.798949	homo
OR10H5	9606.ENSP00000310704	OL	287	1	2879756	0.996	NOG79272	Olfactory receptor 10H5; Odorant receptor (Potential)	-	-	-	-			2.46667	0.39704	0.252801	0.747199	homo
OR10J1	9606.ENSP00000302656	OL	287	1	2879756	0.996	NOG84232	Olfactory receptor 10J1 (Olfactory receptor OR1-26) (Olfactory receptor-like protein HGMP07J [...]	-	-	-	-			1.5625	0.41546	0.332368	0.667632	homo
OR10J3	9606.ENSP00000331789	OL	287	1	2879756	0.996	NOG148711	Olfactory receptor 10J3; Odorant receptor (Potential)	-	-	-	-			1.2	0.34967	0.319204	0.680796	homo
OR10J5	9606.ENSP00000334441	OL	287	1	2879756	0.996	NOG40781	Olfactory receptor 10J5; Odorant receptor (Potential)	-	-	-	-			1.125	0.31698	0.298852	0.701148	homo
OR10J6P	9606.ENSP00000289731	OL	0	0	0	0	NOG84232	Olfactory receptor 10J6; Odorant receptor (Potential)	-	-	-	-			1.5625	0.41546	0.332368	0.667632	homo
OR10K1	9606.ENSP00000289451	OL	287	1	2879756	0.996	NOG40813	Olfactory receptor 10K1; Odorant receptor (Potential)	-	-	-	-			1.5	0.43662	0.356499	0.643501	homo
OR10K2	9606.ENSP00000324251	OL	287	1	2879756	0.996	NOG40813	Olfactory receptor 10K2 (Olfactory receptor OR1-4); Odorant receptor (Potential)	-	-	-	-			1.5	0.43662	0.356499	0.643501	homo
OR10P1	9606.ENSP00000308082	OL	287	1	2879756	0.996	NOG27118	Olfactory receptor 10P1 (Olfactory receptor OR12-7); Odorant receptor (Potential)	-	-	-	-			1.61538	0.37243	0.293027	0.706973	homo
OR10Q1	9606.ENSP00000314324	OL	287	1	2879756	0.996	NOG40008	Olfactory receptor 10Q1; Odorant receptor (Potential)	-	-	-	-			1.83333	0.3407	0.251624	0.748376	homo
OR10R2	9606.ENSP00000357134	OL	287	1	2879756	0.996	NOG117659	Olfactory receptor 10R2; Odorant receptor (Potential)	-	-	-	-			2.35714	0.36411	0.237159	0.762841	homo
OR10S1	9606.ENSP00000353947	OL	287	1	2879756	0.996	NOG74082	Olfactory receptor 10S1; Odorant receptor (Potential)	-	-	-	-			1	0.34088	0.34088	0.65912	homo
OR10T2	9606.ENSP00000334115	OL	287	1	2879756	0.996	NOG74481	Olfactory receptor 10T2 (Olfactory receptor OR1-3); Odorant receptor (Potential)	-	-	-	-			1	0.34088	0.34088	0.65912	homo
OR10V1	9606.ENSP00000302199	OL	287	1	2879756	0.996	NOG47552	Olfactory receptor 10V1; Odorant receptor (Potential)	-	-	-	-			1	0.39793	0.39793	0.60207	homo
OR10W1	9606.ENSP00000311220	OL	287	1	2879756	0.996	NOG42006	Olfactory receptor 10W1 (Olfactory receptor OR11-236); Odorant receptor (Potential)	-	-	-	-			1.21429	0.4016	0.364445	0.635555	homo
OR10X1	9606.ENSP00000357132	OL	0	0	0	0	NOG44200	Olfactory receptor 10X1 (Olfactory receptor OR1-14); Odorant receptor (Potential)	-	-	-	-			1.33333	0.411	0.355937	0.644063	homo
OR10Z1	9606.ENSP00000354707	OL	0	0	0	0	NOG78381	Olfactory receptor 10Z1; Odorant receptor (Potential)	-	-	-	-			1	0.38551	0.38551	0.61449	homo
OR5V1	9606.ENSP00000366356	OL	0	0	0	0	NOG147928	Olfactory receptor 5V1 (Olfactory receptor OR6-26) (Hs6M1-21); Odorant receptor (Potential)	-	-	-	-			2.94118	0.40283	0.234888	0.765112	homo
OR11G2	9606.ENSP00000349930	OL	0	0	0	0	NOG72414	Olfactory receptor 11G2; Odorant receptor (Potential)	-	-	-	-			2.76471	0.40071	0.240994	0.759006	homo
OR11H1	9606.ENSP00000252835	OL	0	0	0	0	NOG74069	Olfactory receptor 11H1 (Olfactory receptor 22-1) (OR22-1); Odorant receptor (Potential)	-	-	-	-			1.25	0.30609	0.273775	0.726225	homo
OR11H12	9606.ENSP00000352724	OL	0	0	0	0	NOG74069	olfactory receptor, family 11, subfamily H, member 1; Odorant receptor (Potential)	-	-	-	-			1.25	0.30609	0.273775	0.726225	homo
OR11H2	9606.ENSP00000334711	OL	0	0	0	0	NOG74069	Seven transmembrane helix receptor (Olfactory receptor OR14-1); Odorant receptor (Potential)	-	-	-	-			1.25	0.30609	0.273775	0.726225	homo
OR11H4	9606.ENSP00000318997	OL	0	0	0	0	NOG75876	Olfactory receptor 11H4 (Olfactory receptor OR14-36); Odorant receptor (Potential)	-	-	-	-			1.28571	0.38867	0.342775	0.657225	homo
OR11H6	9606.ENSP00000319071	OL	0	0	0	0	NOG40487	Olfactory receptor 11H6 (Olfactory receptor OR14-35); Odorant receptor (Potential)	-	-	-	-			1	0.37201	0.37201	0.62799	homo
OR11L1	9606.ENSP00000348033	OL	0	0	0	0	NOG128310	Olfactory receptor 11L1; Odorant receptor (Potential)	-	-	-	-			2.27273	0.2473	0.16404	0.83596	homo
OR12D2	9606.ENSP00000306854	OL	0	0	0	0	NOG78202	olfactory receptor, family 12, subfamily D, member 2	-	-	-	-			3.58824	0.40807	0.215424	0.784576	homo
OR12D3	9606.ENSP00000366348	OL	0	0	0	0	NOG78202	Olfactory receptor 12D3 (Olfactory receptor OR6-27) (Hs6M1-27); Odorant receptor (Potential)	-	-	-	-			3.58824	0.40807	0.215424	0.784576	homo
OR13A1	9606.ENSP00000311379	OL	0	0	0	0	NOG45616	Olfactory receptor 13A1 (Olfactory receptor OR10-3); Odorant receptor (Potential)	-	-	-	-			3.25	0.3444	0.191039	0.808961	homo
OR13C2	9606.ENSP00000317447	OL	0	0	0	0	NOG42788	Olfactory receptor 13C2 (Olfactory receptor OR9-12); Odorant receptor (Potential)	-	-	-	-			1.8	0.39835	0.296913	0.703087	homo
OR13C3	9606.ENSP00000363913	OL	0	0	0	0	NOG42676	Olfactory receptor 13C3; Odorant receptor (Potential)	-	-	-	-			1.8	0.39339	0.293216	0.706784	homo
OR13C4	9606.ENSP00000277216	OL	0	0	0	0	NOG42676	Olfactory receptor 13C4 (Olfactory receptor OR9-7); Odorant receptor (Potential)	-	-	-	-			1.8	0.39339	0.293216	0.706784	homo
OR13C5	9606.ENSP00000363911	OL	0	0	0	0	NOG42788	Olfactory receptor 13C5 (Olfactory receptor OR9-11); Odorant receptor (Potential)	-	-	-	-			1.8	0.39835	0.296913	0.703087	homo
OR13C8	9606.ENSP00000334068	OL	0	0	0	0	NOG43489	Olfactory receptor 13C8; Odorant receptor (Potential)	-	-	-	-			1.16667	0.43774	0.405268	0.594732	homo
OR13C9	9606.ENSP00000259362	OL	0	0	0	0	NOG42788	Olfactory receptor 13C9; Odorant receptor (Potential)	-	-	-	-			1.8	0.39835	0.296913	0.703087	homo
OR13D1	9606.ENSP00000317357	OL	0	0	0	0	NOG72440	Olfactory receptor 13D1; Odorant receptor (Potential)	-	-	-	-			1.5	0.33762	0.275666	0.724334	homo
OR13F1	9606.ENSP00000334452	OL	0	0	0	0	NOG47530	Olfactory receptor 13F1 (Olfactory receptor OR9-6); Odorant receptor (Potential)	-	-	-	-			1.3125	0.41726	0.364214	0.635786	homo
OR13G1	9606.ENSP00000352717	OL	0	0	0	0	NOG83434	Olfactory receptor 13G1; Odorant receptor (Potential)	-	-	-	-			1.76923	0.373	0.280425	0.719575	homo
OR13H1	9606.ENSP00000340748	OL	0	0	0	0	NOG69813	Olfactory receptor 13H1 (Olfactory receptor ORX-1); Odorant receptor (Potential)	-	-	-	-			1.91667	0.29918	0.216102	0.783898	homo
OR13J1	9606.ENSP00000306150	OL	0	0	0	0	NOG134444	Olfactory receptor 13J1 (Olfactory receptor OR9-2); Odorant receptor (Potential)	-	-	-	-			1.3125	0.40702	0.355276	0.644724	homo
OR5AT1	9606.ENSP00000355438	OL	0	0	0	0	NOG132856	Olfactory receptor 5AT1; Odorant receptor (Potential)	-	-	-	-			19.5	0.30323	0.0686681	0.931332	homo
OR5BF1	9606.ENSP00000324534	OL	287	1	2879756	0.996	NOG44311	Olfactory receptor 5BF1 (Olfactory receptor OR1-59); Odorant receptor (Potential)	-	-	-	-			5.5	0.33429	0.142542	0.857458	homo
OR5BU1	9606.ENSP00000339726	OL	0	0	0	0	NOG118351	olfactory receptor, family 5, subfamily BU, member 1; Odorant receptor (Potential)	-	-	-	-			3.58333	0.28127	0.148587	0.851413	homo
OR5U1	9606.ENSP00000366365	OL	0	0	0	0	NOG132856	Olfactory receptor 5U1 (Olfactory receptor OR6-25) (Hs6M1-28)	-	-	-	-			19.5	0.30323	0.0686681	0.931332	homo
OR5AY1	9606.ENSP00000283225	OL	287	1	2879756	0.996	NOG132856	Olfactory receptor 5AY1 (Olfactory receptor OR1-39); Odorant receptor (Potential)	-	-	-	-			19.5	0.30323	0.0686681	0.931332	homo
OR5AV1P	9606.ENSP00000355442	OL	0	0	0	0	NOG132856	Olfactory receptor 5AV1; Odorant receptor (Potential)	-	-	-	-			19.5	0.30323	0.0686681	0.931332	homo
OR1A1	9606.ENSP00000305207	OL	287	1	2879756	0.996	NOG150319	Olfactory receptor 1A1 (Olfactory receptor OR17-11) (Olfactory receptor 17-7) (OR17-7); Odor [...]	-	-	-	-			2.52941	0.39286	0.247018	0.752982	homo
OR1A2	9606.ENSP00000371377	OL	287	1	2879756	0.996	NOG150319	Olfactory receptor 1A2 (Olfactory receptor OR17-10) (Olfactory receptor 17-6) (OR17-6); Odor [...]	-	-	-	-			2.52941	0.39286	0.247018	0.752982	homo
OR1B1	9606.ENSP00000303151	OL	287	1	2879756	0.996	NOG46614	Olfactory receptor 1B1 (Olfactory receptor OR9-26) (Olfactory receptor 9-B) (OR9-B); Odorant [...]	-	-	-	-			1	0.38551	0.38551	0.61449	homo
OR1D2	9606.ENSP00000327585	OL	287	1	2879756	0.996	NOG41734	Olfactory receptor 1D2 (Olfactory receptor OR17-6) (Olfactory receptor-like protein HGMP07E) [...]	-	-	-	-			1.6	0.34442	0.272288	0.727712	homo
OR1D4	9606.ENSP00000327564	OL	0	0	0	0	NOG41734	Olfactory receptor 1D5 (Olfactory receptor 17-31) (OR17-31); Odorant receptor (Potential)	-	-	-	-			1.6	0.34442	0.272288	0.727712	homo
OR1D4	9606.ENSP00000327564	OL	0	0	0	0	NOG41734	Olfactory receptor 1D5 (Olfactory receptor 17-31) (OR17-31); Odorant receptor (Potential)	-	-	-	-			1.6	0.34442	0.272288	0.727712	homo
OR1E1	9606.ENSP00000313384	OL	0	0	0	0	NOG44681	Olfactory receptor 1E1 (Olfactory receptor OR17-18) (Olfactory receptor-like protein HGMP07I [...]	-	-	-	-			3.09524	0.42959	0.244178	0.755822	homo
OR1E2	9606.ENSP00000248384	OL	0	0	0	0	NOG44681	Olfactory receptor 1E2 (Olfactory receptor 17-93/17-135/17-136) (OR17- 93) (OR17-135) (OR17- [...]	-	-	-	-			3.09524	0.42959	0.244178	0.755822	homo
OR1F1	9606.ENSP00000305424	OL	287	1	2879756	0.996	NOG150110	Olfactory receptor 1F1 (Olfactory receptor OR16-4) (Olfactory receptor 16-35) (OR16-35); Odo [...]	-	-	-	-			3.86667	0.34287	0.174366	0.825634	homo
OR1G1	9606.ENSP00000371379	OL	287	1	2879756	0.996	NOG148217	Olfactory receptor 1G1 (Olfactory receptor 17-209) (OR17-209); Odorant receptor (Potential)	-	-	-	-			1.16667	0.27117	0.251054	0.748946	homo
OR1I1	9606.ENSP00000209540	OL	287	1	2879756	0.996	NOG44361	Olfactory receptor 1I1 (Olfactory receptor 19-20) (OR19-20); Odorant receptor (Potential)	-	-	-	-			1.25	0.31421	0.281038	0.718962	homo
OR1J1	9606.ENSP00000259357	OL	287	1	2879756	0.996	NOG46978	Olfactory receptor 1J1 (Olfactory receptor OR9-18); Odorant receptor (Potential)	-	-	-	-			3.38889	0.39436	0.214222	0.785778	homo
OR1J2	9606.ENSP00000343521	OL	287	1	2879756	0.996	NOG46978	Olfactory receptor 1J4 (Olfactory receptor OR9-21) (HTPCRX01); Odorant receptor (Potential)	-	-	-	-			3.38889	0.39436	0.214222	0.785778	homo
OR1K1	9606.ENSP00000277309	OL	287	1	2879756	0.996	NOG74947	Olfactory receptor 1K1; Odorant receptor (Potential)	-	-	-	-			1.1	0.35246	0.336057	0.663943	homo
OR1L1	9606.ENSP00000362790	OL	287	1	2879756	0.996	NOG145599	Olfactory receptor 1L1 (Olfactory receptor 9-C) (OR9-C); Odorant receptor (Potential)	-	-	-	-			1	0.17044	0.17044	0.82956	homo
OR1L3	9606.ENSP00000302863	OL	287	1	2879756	0.996	NOG44632	Olfactory receptor 1L3 (Olfactory receptor 9-D) (OR9-D) (Olfactory receptor OR9-28); Odorant [...]	-	-	-	-			2.6	0.43643	0.270662	0.729338	homo
OR1L4	9606.ENSP00000259466	OL	287	1	2879756	0.996	NOG44632	Olfactory receptor 1L4 (Olfactory receptor 9-E) (OR9-E) (OST046); Odorant receptor (Potential)	-	-	-	-			2.6	0.43643	0.270662	0.729338	homo
OR1L6	9606.ENSP00000362788	OL	287	1	2879756	0.996	NOG44632	Olfactory receptor 1L6; Odorant receptor (Potential)	-	-	-	-			2.6	0.43643	0.270662	0.729338	homo
OR1L8	9606.ENSP00000306607	OL	287	1	2879756	0.996	NOG44632	Olfactory receptor 1L8 (Olfactory receptor OR9-24); Odorant receptor (Potential)	-	-	-	-			2.6	0.43643	0.270662	0.729338	homo
OR1M1	9606.ENSP00000303195	OL	287	1	2879756	0.996	NOG146353	Olfactory receptor 1M1 (Olfactory receptor 19-6) (OR19-6); Odorant receptor (Potential)	-	-	-	-			1.14286	0.40326	0.377215	0.622785	homo
OR1N1	9606.ENSP00000352412	OL	287	1	2879756	0.996	NOG149121	Olfactory receptor 1N1 (Olfactory receptor 1-26) (OR1-26) (Olfactory receptor 1N3) (Olfactor [...]	-	-	-	-			1.5	0.26919	0.219793	0.780207	homo
OR1N2	9606.ENSP00000362792	OL	287	1	2879756	0.996	NOG150582	Olfactory receptor 1N2; Odorant receptor (Potential)	-	-	-	-			1	0.35723	0.35723	0.64277	homo
OR1Q1	9606.ENSP00000297913	OL	287	1	2879756	0.996	NOG147348	Olfactory receptor 1Q1 (Olfactory receptor OR9-25) (Olfactory receptor TPCR106) (Olfactory r [...]	-	-	-	-			1	0.40943	0.40943	0.59057	homo
OR1S1	9606.ENSP00000311688	OL	287	1	2879756	0.996	NOG80114	Olfactory receptor 1S1; Odorant receptor (Potential)	-	-	-	-			1.92308	0.36323	0.261929	0.738071	homo
OR1S2	9606.ENSP00000305469	OL	287	1	2879756	0.996	NOG80114	Olfactory receptor 1S2; Odorant receptor (Potential)	-	-	-	-			1.92308	0.36323	0.261929	0.738071	homo
OR2A4	9606.ENSP00000319546	OL	287	1	2879756	0.996	NOG120592	Olfactory receptor 2A4 (Olfactory receptor OR6-37); Odorant receptor (Potential)	-	-	-	-			1.4	0.34798	0.294097	0.705903	homo
OR2AG1	9606.ENSP00000307447	OL	287	1	2879756	0.996	NOG41022	Olfactory receptor 2AG1 (HT3); Odorant receptor (Potential)	-	-	-	-			2.84211	0.40521	0.240359	0.759641	homo
OR2AG2	9606.ENSP00000342697	OL	0	0	0	0	NOG41022	olfactory receptor, family 2, subfamily AG, member 2; Odorant receptor (Potential)	-	-	-	-			2.84211	0.40521	0.240359	0.759641	homo
OR2AJ1	9606.ENSP00000325078	OL	287	1	2879756	0.996	NOG42559	Olfactory receptor 2AJ1; Odorant receptor (Potential)	-	-	-	-			1.36364	0.35737	0.306033	0.693967	homo
OR2AK2	9606.ENSP00000355436	OL	287	1	2879756	0.996	NOG45573	Olfactory receptor 2AK2 (Olfactory receptor OR1-47); Odorant receptor (Potential)	-	-	-	-			4.28571	0.22571	0.109028	0.890972	homo
OR2AP1	9606.ENSP00000323423	OL	287	1	2879756	0.996	NOG41315	Olfactory receptor 2AP1 (Olfactory receptor OR12-9); Odorant receptor (Potential)	-	-	-	-			2.44444	0.43217	0.276417	0.723583	homo
OR2AT4	9606.ENSP00000304846	OL	0	0	0	0	NOG87248	olfactory receptor, family 2, subfamily AT, member 4; Odorant receptor (Potential)	-	-	-	-			2	0.34699	0.245359	0.754641	homo
OR2B11	9606.ENSP00000325682	OL	287	1	2879756	0.996	NOG39029	Olfactory receptor 2B11; Odorant receptor (Potential)	-	-	-	-			2.88889	0.42061	0.247465	0.752535	homo
OR2B2	9606.ENSP00000304419	OL	287	1	2879756	0.996	NOG39029	Olfactory receptor 2B2 (Olfactory receptor 6-1) (OR6-1) (Hs6M1-10); Odorant receptor (Potential)	-	-	-	-			2.88889	0.42061	0.247465	0.752535	homo
OR2B3	9606.ENSP00000366378	OL	0	0	0	0	NOG39029	Olfactory receptor 2B3 (Olfactory receptor OR6-14) (Olfactory receptor 6-4) (OR6-4) (Hs6M1-1)	-	-	-	-			2.88889	0.42061	0.247465	0.752535	homo
OR2B6	9606.ENSP00000244623	OL	287	1	2879756	0.996	NOG147018	Olfactory receptor 2B6 (Olfactory receptor OR6-4) (Olfactory receptor 6-31) (OR6-31) (Olfact [...]	-	-	-	-			1	0.21507	0.21507	0.78493	homo
OR2C1	9606.ENSP00000307726	OL	287	1	2879756	0.996	NOG40930	Olfactory receptor 2C1 (Olfactory receptor OR16-1) (OLFmf3); Odorant receptor (Potential)	-	-	-	-			1.36364	0.35196	0.3014	0.6986	homo
OR2C3	9606.ENSP00000326567	OL	287	1	2879756	0.996	NOG135087	Olfactory receptor 2C3; Odorant receptor (Potential)	-	-	-	-			1	0.27798	0.27798	0.72202	homo
OR2D2	9606.ENSP00000299459	OL	287	1	2879756	0.996	NOG41948	Olfactory receptor 2D2 (Olfactory receptor OR11-88) (Olfactory receptor 11-610) (OR11-610) ( [...]	-	-	-	-			1.53846	0.38137	0.30747	0.69253	homo
OR2D3	9606.ENSP00000320560	OL	287	1	2879756	0.996	NOG74246	Olfactory receptor 2D3; Odorant receptor (Potential)	-	-	-	-			2.17647	0.4003	0.271337	0.728663	homo
OR2G2	9606.ENSP00000326349	OL	287	1	2879756	0.996	NOG39029	Olfactory receptor 2G2 (Olfactory receptor OR1-32); Odorant receptor (Potential)	-	-	-	-			2.88889	0.42061	0.247465	0.752535	homo
OR2G3	9606.ENSP00000326301	OL	287	1	2879756	0.996	NOG39029	Olfactory receptor 2G3 (Olfactory receptor OR1-33); Odorant receptor (Potential)	-	-	-	-			2.88889	0.42061	0.247465	0.752535	homo
OR2G6	9606.ENSP00000341291	OL	287	1	2879756	0.996	NOG149363	Olfactory receptor 2G6; Odorant receptor (Potential)	-	-	-	-			1.23077	0.38474	0.3468	0.6532	homo
ENSG00000206516	9606.ENSP00000373140	OL	0	0	0	0	NOG115807	Olfactory receptor 2H1 (Olfactory receptor OR6-32) (Hs6M1-16) (Olfactory receptor 6-2) (OR6- [...]	-	-	-	-			2.7	0.4376	0.266315	0.733685	homo
OR2J1	9606.ENSP00000366376	OL	287	1	2879756	0.996	NOG146915	Olfactory receptor 2J1 (Olfactory receptor 6-5) (OR6-5) (Hs6M1-4); Odorant receptor (Potential)	-	-	-	-			1	0.17044	0.17044	0.82956	homo
ENSG00000206522	9606.ENSP00000373147	OL	0	0	0	0	NOG146261	Olfactory receptor 2J3 (Olfactory receptor OR6-16) (Olfactory receptor 6-6) (OR6-6) (Hs6M1-3)	-	-	-	-			1.8	0.37941	0.282796	0.717204	homo
OR2K2	9606.ENSP00000363550	OL	287	1	2879756	0.996	NOG146062	Olfactory receptor 2K2 (HTPCRH06); Odorant receptor (Potential)	-	-	-	-			1	0.35723	0.35723	0.64277	homo
OR2L13	9606.ENSP00000355434	OL	287	1	2879756	0.996	NOG44451	Olfactory receptor 2L13; Odorant receptor (Potential)	-	-	-	-			4.78947	0.422	0.192827	0.807173	homo
OR2L2	9606.ENSP00000355435	OL	287	1	2879756	0.996	NOG44451	Olfactory receptor 2L2 (HTPCRH07); Odorant receptor (Potential)	-	-	-	-			4.78947	0.422	0.192827	0.807173	homo
OR2L3	9606.ENSP00000353044	OL	287	1	2879756	0.996	NOG44451	Olfactory receptor 2L3; Odorant receptor (Potential)	-	-	-	-			4.78947	0.422	0.192827	0.807173	homo
OR2L5	9606.ENSP00000347428	OL	287	1	2879756	0.996	NOG44451	Olfactory receptor 2L5 (Olfactory receptor OR1-53); Odorant receptor (Potential)	-	-	-	-			4.78947	0.422	0.192827	0.807173	homo
OR2L8	9606.ENSP00000349719	OL	287	1	2879756	0.996	NOG44451	Olfactory receptor 2L8 (Olfactory receptor OR1-46); Odorant receptor (Potential)	-	-	-	-			4.78947	0.422	0.192827	0.807173	homo
OR2M2	9606.ENSP00000352710	OL	287	1	2879756	0.996	NOG42540	Olfactory receptor 2M2 (OST423); Odorant receptor (Potential)	-	-	-	-			3.13333	0.39917	0.225504	0.774496	homo
OR2M4	9606.ENSP00000306688	OL	287	1	2879756	0.996	NOG42540	Olfactory receptor 2M4 (Olfactory receptor OR1-55) (Olfactory receptor TPCR100) (OST710) (HT [...]	-	-	-	-			3.13333	0.39917	0.225504	0.774496	homo
OR2M5	9606.ENSP00000355432	OL	287	1	2879756	0.996	NOG42540	olfactory receptor, family 2, subfamily M, member 5; Odorant receptor (Potential)	-	-	-	-			3.13333	0.39917	0.225504	0.774496	homo
OR2M7	9606.ENSP00000324557	OL	287	1	2879756	0.996	NOG42540	Olfactory receptor 2M7 (Olfactory receptor OR1-58); Odorant receptor (Potential)	-	-	-	-			3.13333	0.39917	0.225504	0.774496	homo
OR2S2	9606.ENSP00000344040	OL	287	1	2879756	0.996	NOG87339	Olfactory receptor 2S2 (Olfactory receptor OR9-3); Odorant receptor (Potential)	-	-	-	-			2.36842	0.43125	0.28022	0.71978	homo
OR2T1	9606.ENSP00000355430	OL	287	1	2879756	0.996	NOG150007	Olfactory receptor 2T1 (Olfactory receptor OR1-61) (Olfactory receptor 1-25) (OR1-25); Odora [...]	-	-	-	-			1.1	0.35246	0.336057	0.663943	homo
OR2T10	9606.ENSP00000329210	OL	287	1	2879756	0.996	NOG150161	Olfactory receptor 2T10 (Olfactory receptor OR1-64); Odorant receptor (Potential)	-	-	-	-			1	0.10754	0.10754	0.89246	homo
OR2T11	9606.ENSP00000328934	OL	287	1	2879756	0.996	NOG44210	Olfactory receptor 2T11 (Olfactory receptor OR1-65); Odorant receptor (Potential)	-	-	-	-			1.15385	0.39146	0.364429	0.635571	homo
OR2T12	9606.ENSP00000324583	OL	287	1	2879756	0.996	NOG47682	Olfactory receptor 2T12 (Olfactory receptor OR1-57); Odorant receptor (Potential)	-	-	-	-			3.57143	0.35016	0.185287	0.814713	homo
OR2T2	9606.ENSP00000343062	OL	287	1	2879756	0.996	NOG151052	Olfactory receptor 2T2 (Olfactory receptor OR1-43); Odorant receptor (Potential)	-	-	-	-			1.28571	0.39611	0.349337	0.650663	homo
OR2T27	9606.ENSP00000342008	OL	287	1	2879756	0.996	NOG150080	Olfactory receptor 2T27 (Olfactory receptor OR1-67); Odorant receptor (Potential)	-	-	-	-			1.27273	0.35754	0.316925	0.683075	homo
OR2T29	9606.ENSP00000331774	OL	287	1	2879756	0.996	NOG45249	Olfactory receptor 2T29; Odorant receptor (Potential)	-	-	-	-			3	0.40375	0.233105	0.766895	homo
OR2T3	9606.ENSP00000352604	OL	287	1	2879756	0.996	NOG147931	Olfactory receptor 2T3; Odorant receptor (Potential)	-	-	-	-			1.85714	0.27588	0.202441	0.797559	homo
OR2T33	9606.ENSP00000324687	OL	287	1	2879756	0.996	NOG47682	Olfactory receptor 2T33 (Olfactory receptor OR1-56); Odorant receptor (Potential)	-	-	-	-			3.57143	0.35016	0.185287	0.814713	homo
OR2T34	9606.ENSP00000330904	OL	287	1	2879756	0.996	NOG147931	Olfactory receptor 2T34 (Olfactory receptor OR1-63); Odorant receptor (Potential)	-	-	-	-			1.85714	0.27588	0.202441	0.797559	homo
OR2T35	9606.ENSP00000324369	OL	287	1	2879756	0.996	NOG151052	Olfactory receptor 2T35 (Olfactory receptor OR1-66); Odorant receptor (Potential)	-	-	-	-			1.28571	0.39611	0.349337	0.650663	homo
OR2T4	9606.ENSP00000355431	OL	287	1	2879756	0.996	NOG45249	Olfactory receptor 2T4 (Olfactory receptor OR1-60); Odorant receptor (Potential)	-	-	-	-			3	0.40375	0.233105	0.766895	homo
OR2T5	9606.ENSP00000355429	OL	287	1	2879756	0.996	NOG45249	Olfactory receptor 2T5 (Olfactory receptor OR1-62); Odorant receptor (Potential)	-	-	-	-			3	0.40375	0.233105	0.766895	homo
OR2T6	9606.ENSP00000347965	OL	0	0	0	0	NOG81984	olfactory receptor, family 2, subfamily T, member 6; Odorant receptor (Potential)	-	-	-	-			1.07692	0.39407	0.379736	0.620264	homo
OR2T27	9606.ENSP00000342008	OL	287	1	2879756	0.996	NOG150080	Olfactory receptor 2T27 (Olfactory receptor OR1-67); Odorant receptor (Potential)	-	-	-	-			1.27273	0.35754	0.316925	0.683075	homo
OR2T8	9606.ENSP00000326225	OL	0	0	0	0	NOG47682	olfactory receptor, family 2, subfamily T, member 8; Odorant receptor (Potential)	-	-	-	-			3.57143	0.35016	0.185287	0.814713	homo
OR2V2	9606.ENSP00000332185	OL	287	1	2879756	0.996	NOG39955	Olfactory receptor 2V2 (Olfactory receptor OR5-3); Odorant receptor (Potential)	-	-	-	-			1.26667	0.41153	0.365654	0.634346	homo
ENSG00000206525	9606.ENSP00000373150	OL	0	0	0	0	NOG150761	Olfactory receptor 2W1 (Olfactory receptor OR6-13) (Hs6M1-15)	-	-	-	-			2	0.39121	0.276627	0.723373	homo
OR2W5	9606.ENSP00000355448	OL	0	0	0	0	NOG147048	olfactory receptor, family 2, subfamily W, member 5; Odorant receptor (Potential)	-	-	-	-			1	0.17044	0.17044	0.82956	homo
OR2W6P	9606.ENSP00000303839	OL	0	0	0	0	NOG41945	Seven transmembrane helix receptor; Odorant receptor (Potential)	-	-	-	-			1.75	0.39556	0.299015	0.700985	homo
OR2Y1	9606.ENSP00000312403	OL	287	1	2879756	0.996	NOG39798	Olfactory receptor 2Y1 (Olfactory receptor OR5-2); Odorant receptor (Potential)	-	-	-	-			3.625	0.3336	0.175215	0.824785	homo
OR2Z1	9606.ENSP00000316284	OL	287	1	2879756	0.996	NOG79224	Olfactory receptor 2Z1 (Olfactory receptor OR19-4); Odorant receptor (Potential)	-	-	-	-			1.42105	0.43662	0.366268	0.633732	homo
OR3A1	9606.ENSP00000313803	OL	287	1	2879756	0.996	NOG46142	Olfactory receptor 3A1 (Olfactory receptor OR17-15) (Olfactory receptor 17-40) (OR17-40); Od [...]	-	-	-	-			2.8	0.45783	0.273606	0.726394	homo
OR3A3	9606.ENSP00000291231	OL	287	1	2879756	0.996	NOG46142	Olfactory receptor 3A3 (Olfactory receptor 17-201) (OR17-201); Odorant receptor (Potential)	-	-	-	-			2.8	0.45783	0.273606	0.726394	homo
OR3A4	9606.ENSP00000313764	OL	287	1	2879756	0.996	NOG145719	Olfactory receptor 3A4 (Olfactory receptor 17-24) (OR17-24); Odorant receptor (Potential)	-	-	-	-			1.1	0.35246	0.336057	0.663943	homo
OR4A15	9606.ENSP00000325065	OL	287	1	2879756	0.996	NOG145939	Olfactory receptor 4A15 (Olfactory receptor OR11-118); Odorant receptor (Potential)	-	-	-	-			2.85	0.42719	0.253046	0.746954	homo
OR4A16	9606.ENSP00000325128	OL	287	1	2879756	0.996	NOG145939	Olfactory receptor 4A16 (Olfactory receptor OR11-117); Odorant receptor (Potential)	-	-	-	-			2.85	0.42719	0.253046	0.746954	homo
OR4B1	9606.ENSP00000311605	OL	287	1	2879756	0.996	NOG47746	Olfactory receptor 4B1 (Olfactory receptor OR11-106) (OST208); Odorant receptor (Potential)	-	-	-	-			3.04167	0.46316	0.265568	0.734432	homo
OR4C11	9606.ENSP00000306651	OL	287	1	2879756	0.996	NOG42331	Olfactory receptor 4C11 (Olfactory receptor OR11-136); Odorant receptor (Potential)	-	-	-	-			4.14286	0.4023	0.197651	0.802349	homo
OR4C13	9606.ENSP00000314947	OL	287	1	2879756	0.996	NOG43086	Olfactory receptor 4C13 (Olfactory receptor OR11-260); Odorant receptor (Potential)	-	-	-	-			3	0.3856	0.222626	0.777374	homo
OR4C15	9606.ENSP00000324958	OL	287	1	2879756	0.996	NOG129537	Olfactory receptor 4C15 (Olfactory receptor OR11-127) (Olfactory receptor OR11-134); Odorant [...]	-	-	-	-			2.45455	0.31909	0.20367	0.79633	homo
OR4C16	9606.ENSP00000324913	OL	287	1	2879756	0.996	NOG42331	Olfactory receptor 4C16 (Olfactory receptor OR11-135); Odorant receptor (Potential)	-	-	-	-			4.14286	0.4023	0.197651	0.802349	homo
OR4C3	9606.ENSP00000321419	OL	287	1	2879756	0.996	NOG114884	Olfactory receptor 4C3 (Olfactory receptor OR11-98); Odorant receptor (Potential)	-	-	-	-			1.33333	0.411	0.355937	0.644063	homo
OR4C45	9606.ENSP00000367701	OL	0	0	0	0	NOG42026	olfactory receptor, family 4, subfamily C, member 45; Odorant receptor (Potential)	-	-	-	-			2.14286	0.369	0.252075	0.747925	homo
OR4C46	9606.ENSP00000329056	OL	0	0	0	0	NOG43086	olfactory receptor, family 4, subfamily C, member 46; Odorant receptor (Potential)	-	-	-	-			3	0.3856	0.222626	0.777374	homo
OR4C5	9606.ENSP00000321338	OL	287	1	2879756	0.996	NOG42721	Olfactory receptor 4C5 (Olfactory receptor OR11-99); Odorant receptor (Potential)	-	-	-	-			3.625	0.22273	0.116984	0.883016	homo
OR4C6	9606.ENSP00000324769	OL	287	1	2879756	0.996	NOG136221	Olfactory receptor 4C6 (Olfactory receptor OR11-138); Odorant receptor (Potential)	-	-	-	-			2.09091	0.34847	0.240989	0.759011	homo
ENSG00000141194	9606.ENSP00000365451	OL	0	0	0	0	NOG42916	Seven transmembrane helix receptor	-	-	-	-			2.7	0.43423	0.264264	0.735736	homo
OR4D10	9606.ENSP00000320124	OL	0	0	0	0	NOG47369	Olfactory receptor, family 4, subfamily D, member 10; Odorant receptor (Potential)	-	-	-	-			3.52632	0.44326	0.236047	0.763953	homo
OR4D11	9606.ENSP00000320077	OL	287	1	2879756	0.996	NOG47369	Olfactory receptor 4D11; Odorant receptor (Potential)	-	-	-	-			3.52632	0.44326	0.236047	0.763953	homo
OR4D2	9606.ENSP00000284081	OL	287	1	2879756	0.996	NOG42916	Olfactory receptor 4D2 (Olfactory receptor OR17-24) (B-lymphocyte membrane protein BC2009); [...]	-	-	-	-			2.7	0.43423	0.264264	0.735736	homo
OR4D5	9606.ENSP00000305970	OL	287	1	2879756	0.996	NOG147236	Olfactory receptor 4D5 (Olfactory receptor OR11-276); Odorant receptor (Potential)	-	-	-	-			1	0.35723	0.35723	0.64277	homo
OR4D6	9606.ENSP00000300127	OL	287	1	2879756	0.996	NOG148673	Olfactory receptor 4D6 (Olfactory receptor OR11-250); Odorant receptor (Potential)	-	-	-	-			1.07692	0.39407	0.379736	0.620264	homo
OR4D9	9606.ENSP00000328563	OL	287	1	2879756	0.996	NOG47369	Olfactory receptor 4D9 (Olfactory receptor OR11-253); Odorant receptor (Potential)	-	-	-	-			3.52632	0.44326	0.236047	0.763953	homo
OR4F15	9606.ENSP00000333184	OL	287	1	2879756	0.996	NOG47042	Olfactory receptor 4F15 (Olfactory receptor OR15-14); Odorant receptor (Potential)	-	-	-	-			1.52941	0.42477	0.343472	0.656528	homo
OR4F3	9606.ENSP00000329982	OL	287	1	2879756	0.996	NOG148479	Olfactory receptor 4F29 (Olfactory receptor OR1-1); Odorant receptor (Potential)	-	-	-	-			1.53846	0.37468	0.302077	0.697923	homo
OR4F17	9606.ENSP00000315047	OL	287	1	2879756	0.996	NOG146672	Olfactory receptor 4F17; Odorant receptor (Potential)	-	-	-	-			1.63636	0.35125	0.274585	0.725415	homo
ENSG00000176269	9606.ENSP00000318878	OL	0	0	0	0	NOG148479	olfactory receptor, family 4, subfamily F, member 21; Odorant receptor (Potential)	-	-	-	-			1.53846	0.37468	0.302077	0.697923	homo
OR4F4	9606.ENSP00000334393	OL	287	1	2879756	0.996	NOG146672	Olfactory receptor 4F4 (Olfactory receptor OR19-3) (HS14a-1-A); Odorant receptor (Potential)	-	-	-	-			1.63636	0.35125	0.274585	0.725415	homo
OR4F5	9606.ENSP00000317482	OL	287	1	2879756	0.996	NOG146672	Olfactory receptor 4F5; Odorant receptor (Potential)	-	-	-	-			1.63636	0.35125	0.274585	0.725415	homo
OR4F6	9606.ENSP00000327525	OL	287	1	2879756	0.996	NOG45865	Olfactory receptor 4F6 (Olfactory receptor OR15-15); Odorant receptor (Potential)	-	-	-	-			1	0.35723	0.35723	0.64277	homo
OR4K1	9606.ENSP00000285600	OL	287	1	2879756	0.996	NOG148675	Olfactory receptor 4K1; Odorant receptor (Potential)	-	-	-	-			1.26667	0.41153	0.365654	0.634346	homo
OR4K13	9606.ENSP00000319322	OL	287	1	2879756	0.996	NOG69065	Olfactory receptor 4K13 (Olfactory receptor OR14-27); Odorant receptor (Potential)	-	-	-	-			1.2	0.34967	0.319204	0.680796	homo
OR4K14	9606.ENSP00000305011	OL	287	1	2879756	0.996	NOG147575	Olfactory receptor 4K14 (Olfactory receptor OR14-22); Odorant receptor (Potential)	-	-	-	-			1.11111	0.33572	0.318492	0.681508	homo
OR4K15	9606.ENSP00000304077	OL	287	1	2879756	0.996	NOG150980	Olfactory receptor 4K15; Odorant receptor (Potential)	-	-	-	-			1.93333	0.39218	0.282054	0.717946	homo
OR4K17	9606.ENSP00000319197	OL	287	1	2879756	0.996	NOG150980	Olfactory receptor 4K17; Odorant receptor (Potential)	-	-	-	-			1.93333	0.39218	0.282054	0.717946	homo
OR4K2	9606.ENSP00000298642	OL	287	1	2879756	0.996	NOG148173	Olfactory receptor 4K2 (Olfactory receptor OR14-15); Odorant receptor (Potential)	-	-	-	-			1.08333	0.38139	0.366428	0.633572	homo
OR4K5	9606.ENSP00000319511	OL	287	1	2879756	0.996	NOG146473	Olfactory receptor 4K5 (Olfactory receptor OR14-16); Odorant receptor (Potential)	-	-	-	-			1.07692	0.39407	0.379736	0.620264	homo
OR4L1	9606.ENSP00000319217	OL	287	1	2879756	0.996	NOG147201	Olfactory receptor 4L1 (Olfactory receptor OR14-28); Odorant receptor (Potential)	-	-	-	-			1.0625	0.4269	0.414154	0.585846	homo
OR4M1	9606.ENSP00000319654	OL	287	1	2879756	0.996	NOG67996	Olfactory receptor 4M1; Odorant receptor (Potential)	-	-	-	-			1.0625	0.4269	0.414154	0.585846	homo
OR4M2	9606.ENSP00000329467	OL	287	1	2879756	0.996	NOG67996	Olfactory receptor 4M2; Odorant receptor (Potential)	-	-	-	-			1.0625	0.4269	0.414154	0.585846	homo
OR4N2	9606.ENSP00000319601	OL	287	1	2879756	0.996	NOG43237	Olfactory receptor 4N2 (Olfactory receptor OR14-8); Odorant receptor (Potential)	-	-	-	-			1.88235	0.42672	0.311023	0.688977	homo
OR4N4	9606.ENSP00000332500	OL	287	1	2879756	0.996	NOG127930	Olfactory receptor 4N4 (Olfactory receptor OR15-1); Odorant receptor (Potential)	-	-	-	-			1	0.10754	0.10754	0.89246	homo
OR4N5	9606.ENSP00000332110	OL	287	1	2879756	0.996	NOG43237	Olfactory receptor 4N5 (Olfactory receptor OR14-33); Odorant receptor (Potential)	-	-	-	-			1.88235	0.42672	0.311023	0.688977	homo
OR4P4	9606.ENSP00000324831	OL	287	1	2879756	0.996	NOG131464	Olfactory receptor 4P4; Odorant receptor (Potential)	-	-	-	-			2.68421	0.41627	0.254078	0.745922	homo
OR4Q2	9606.ENSP00000372501	OL	0	0	0	0	NOG40180	Olfactory receptor 4Q2; Odorant receptor (Potential)	-	-	-	-			1.2	0.40806	0.372506	0.627494	homo
OR4Q3	9606.ENSP00000330049	OL	287	1	2879756	0.996	NOG146555	Olfactory receptor 4Q3 (Olfactory receptor OR14-3); Odorant receptor (Potential)	-	-	-	-			1.125	0.31698	0.298852	0.701148	homo
OR4S1	9606.ENSP00000321447	OL	287	1	2879756	0.996	NOG47746	Olfactory receptor 4S1 (Olfactory receptor OR11-100); Odorant receptor (Potential)	-	-	-	-			3.04167	0.46316	0.265568	0.734432	homo
OR4S2	9606.ENSP00000310337	OL	287	1	2879756	0.996	NOG47746	Olfactory receptor 4S2 (Olfactory receptor OR11-137); Odorant receptor (Potential)	-	-	-	-			3.04167	0.46316	0.265568	0.734432	homo
OR4X1	9606.ENSP00000321506	OL	287	1	2879756	0.996	NOG47479	Olfactory receptor 4X1 (Olfactory receptor OR11-104); Odorant receptor (Potential)	-	-	-	-			1	0.32261	0.32261	0.67739	homo
OR4X2	9606.ENSP00000307751	OL	287	1	2879756	0.996	NOG43600	Olfactory receptor 4X2 (Olfactory receptor OR11-105); Odorant receptor (Potential)	-	-	-	-			1.8	0.39875	0.297211	0.702789	homo
OR51A2	9606.ENSP00000369729	OL	287	1	2879756	0.996	NOG68728	Olfactory receptor 51A2; Odorant receptor (Potential)	-	-	-	-			2.27273	0.30128	0.199846	0.800154	homo
OR51A4	9606.ENSP00000369731	OL	287	1	2879756	0.996	NOG68728	Olfactory receptor 51A4; Odorant receptor (Potential)	-	-	-	-			2.27273	0.30128	0.199846	0.800154	homo
OR51A7	9606.ENSP00000352305	OL	287	1	2879756	0.996	NOG146771	Olfactory receptor 51A7; Odorant receptor (Potential)	-	-	-	-			1.35714	0.39593	0.339865	0.660135	homo
OR51B2	9606.ENSP00000327540	OL	287	1	2879756	0.996	NOG42936	Olfactory receptor 51B2 (Odorant receptor HOR5'beta3); Odorant receptor (Potential)	-	-	-	-			2.73684	0.43289	0.261669	0.738331	homo
OR51B4	9606.ENSP00000333305	OL	287	1	2879756	0.996	NOG42936	Olfactory receptor 51B4 (Odorant receptor HOR5'beta1); Odorant receptor (Potential)	-	-	-	-			2.73684	0.43289	0.261669	0.738331	homo
OR51B6	9606.ENSP00000369568	OL	287	1	2879756	0.996	NOG42936	Olfactory receptor 51B5 (Odorant receptor HOR5'beta6); Odorant receptor (Potential)	-	-	-	-			2.73684	0.43289	0.261669	0.738331	homo
OR51D1	9606.ENSP00000350222	OL	287	1	2879756	0.996	NOG85407	Olfactory receptor 51D1 (Olfactory receptor OR11-14); Odorant receptor (Potential)	-	-	-	-			1	0.38551	0.38551	0.61449	homo
OR51E1	9606.ENSP00000325744	OL	287	1	2879756	0.996	NOG145581	Olfactory receptor 51E1 (Prostate overexpressed G protein-coupled receptor); Odorant recepto [...]	-	-	-	-			1	0.40943	0.40943	0.59057	homo
OR51E2	9606.ENSP00000337929	OL	287	1	2879756	0.996	NOG42859	Olfactory receptor 51E2 (Olfactory receptor OR11-16) (Prostate- specific G-protein coupled r [...]	-	-	-	-			1	0.42013	0.42013	0.57987	homo
OR51F1	9606.ENSP00000369744	OL	0	0	0	0	NOG42966	olfactory receptor, family 51, subfamily F, member 1; Odorant receptor (Potential)	-	-	-	-			1.57143	0.39765	0.317215	0.682785	homo
OR51F2	9606.ENSP00000323952	OL	287	1	2879756	0.996	NOG76064	Olfactory receptor 51F2; Odorant receptor (Potential)	-	-	-	-			1.11111	0.33572	0.318492	0.681508	homo
OR51G1	9606.ENSP00000322546	OL	287	1	2879756	0.996	NOG39219	Olfactory receptor 51G1; Odorant receptor (Potential)	-	-	-	-			1.08333	0.38139	0.366428	0.633572	homo
OR51G2	9606.ENSP00000322593	OL	287	1	2879756	0.996	NOG45255	Olfactory receptor 51G2; Odorant receptor (Potential)	-	-	-	-			1.2	0.41257	0.376623	0.623377	homo
OR51H1P	9606.ENSP00000322724	OL	287	1	2879756	0.996	NOG44901	Olfactory receptor 51H1; Odorant receptor (Potential)	-	-	-	-			1.14286	0.40326	0.377215	0.622785	homo
OR51I1	9606.ENSP00000369559	OL	287	1	2879756	0.996	NOG46991	Olfactory receptor 51I1 (Olfactory receptor OR11-39) (Odorant receptor HOR5'beta11); Odorant [...]	-	-	-	-			1.5625	0.40686	0.325488	0.674512	homo
OR51I2	9606.ENSP00000341987	OL	287	1	2879756	0.996	NOG148345	Olfactory receptor 51I2 (Olfactory receptor OR11-38) (Odorant receptor HOR5'beta12); Odorant [...]	-	-	-	-			1.21053	0.44551	0.40492	0.59508	homo
OR51J1	9606.ENSP00000332473	OL	287	1	2879756	0.996	NOG39005	HOR5'Beta8; Odorant receptor (Potential)	-	-	-	-			1	0.24969	0.24969	0.75031	homo
OR51L1	9606.ENSP00000322156	OL	287	1	2879756	0.996	NOG144992	Olfactory receptor 51L1; Odorant receptor (Potential)	-	-	-	-			1.07692	0.39407	0.379736	0.620264	homo
OR51M1	9606.ENSP00000333196	OL	287	1	2879756	0.996	NOG38847	Olfactory receptor 51M1 (Olfactory receptor OR11-40) (Odorant receptor HOR5'beta7); Odorant [...]	-	-	-	-			1	0.37201	0.37201	0.62799	homo
OR51Q1	9606.ENSP00000300778	OL	287	1	2879756	0.996	NOG46377	Olfactory receptor 51Q1; Odorant receptor (Potential)	-	-	-	-			1.66667	0.40686	0.315152	0.684848	homo
OR51S1	9606.ENSP00000322754	OL	287	1	2879756	0.996	NOG40020	Olfactory receptor 51S1; Odorant receptor (Potential)	-	-	-	-			1	0.39793	0.39793	0.60207	homo
OR51T1	9606.ENSP00000369738	OL	287	1	2879756	0.996	NOG133886	Olfactory receptor 51T1; Odorant receptor (Potential)	-	-	-	-			1.21429	0.4016	0.364445	0.635555	homo
OR51V1	9606.ENSP00000321729	OL	287	1	2879756	0.996	NOG148145	Olfactory receptor 51V1 (Olfactory receptor OR11-36) (Odorant receptor HOR3'beta1); Odorant [...]	-	-	-	-			2.61905	0.44423	0.274496	0.725504	homo
OR52A1	9606.ENSP00000369725	OL	287	1	2879756	0.996	NOG86443	Olfactory receptor 52A1 (Olfactory receptor OR11-319) (HPFH1OR) (Odorant receptor HOR3'beta4 [...]	-	-	-	-			4.52381	0.43317	0.20366	0.79634	homo
OR52A4	9606.ENSP00000369727	OL	0	0	0	0	NOG128197	olfactory receptor, family 52, subfamily A, member 4	-	-	-	-			1	0.10754	0.10754	0.89246	homo
OR52A5	9606.ENSP00000303469	OL	287	1	2879756	0.996	NOG86443	Olfactory receptor 52A5 (Olfactory receptor OR11-33) (Odorant receptor HOR3'beta5); Odorant [...]	-	-	-	-			4.52381	0.43317	0.20366	0.79634	homo
OR52B6	9606.ENSP00000341581	OL	287	1	2879756	0.996	NOG147576	Olfactory receptor 52B6; Odorant receptor (Potential)	-	-	-	-			1	0.32261	0.32261	0.67739	homo
OR52D1	9606.ENSP00000326232	OL	287	1	2879756	0.996	NOG48158	Olfactory receptor 52D1 (Olfactory receptor OR11-43) (Odorant receptor HOR5'beta14); Odorant [...]	-	-	-	-			1.35294	0.42681	0.36694	0.63306	homo
OR52E2	9606.ENSP00000322088	OL	287	1	2879756	0.996	NOG74131	Olfactory receptor 52E2; Odorant receptor (Potential)	-	-	-	-			2.09091	0.34448	0.23823	0.76177	homo
OR52E4	9606.ENSP00000321426	OL	287	1	2879756	0.996	NOG148093	Olfactory receptor 52E4; Odorant receptor (Potential)	-	-	-	-			1.41176	0.43032	0.362169	0.637831	homo
OR52E5	9606.ENSP00000321398	OL	287	1	2879756	0.996	NOG41008	Olfactory receptor 52E5; Odorant receptor (Potential)	-	-	-	-			1.22222	0.43676	0.395065	0.604935	homo
OR52E6	9606.ENSP00000369279	OL	287	1	2879756	0.996	NOG79452	Olfactory receptor 52E6; Odorant receptor (Potential)	-	-	-	-			1.92308	0.3843	0.277122	0.722878	homo
OR52E8	9606.ENSP00000328878	OL	287	1	2879756	0.996	NOG79452	Olfactory receptor 52E8 (Olfactory receptor OR11-54); Odorant receptor (Potential)	-	-	-	-			1.92308	0.3843	0.277122	0.722878	homo
OR52H1	9606.ENSP00000326259	OL	287	1	2879756	0.996	NOG86134	Olfactory receptor 52H1; Odorant receptor (Potential)	-	-	-	-			2.4	0.43527	0.280966	0.719034	homo
OR52J3	9606.ENSP00000369728	OL	0	0	0	0	NOG119554	Olfactory receptor 52J3; Odorant receptor (Potential)	-	-	-	-			1.85714	0.37988	0.278756	0.721244	homo
OR52K1	9606.ENSP00000302422	OL	287	1	2879756	0.996	NOG47490	Olfactory receptor 52K1; Odorant receptor (Potential)	-	-	-	-			1.55556	0.42629	0.341792	0.658208	homo
OR52K2	9606.ENSP00000318956	OL	287	1	2879756	0.996	NOG71951	Olfactory receptor 52K2; Odorant receptor (Potential)	-	-	-	-			2.375	0.29143	0.189105	0.810895	homo
OR52L1	9606.ENSP00000330338	OL	287	1	2879756	0.996	NOG47361	Olfactory receptor 52L1; Odorant receptor (Potential)	-	-	-	-			1.23077	0.38982	0.351379	0.648621	homo
OR52L2P	9606.ENSP00000321219	OL	0	0	0	0	NOG47361	Olfactory receptor 52L2; Odorant receptor (Potential)	-	-	-	-			1.23077	0.38982	0.351379	0.648621	homo
OR52M1	9606.ENSP00000353343	OL	287	1	2879756	0.996	NOG81318	Olfactory receptor 52M1 (Olfactory receptor OR11-11); Odorant receptor (Potential)	-	-	-	-			1.375	0.4172	0.355789	0.644211	homo
OR52N1	9606.ENSP00000322823	OL	287	1	2879756	0.996	NOG45467	Olfactory receptor 52N1; Odorant receptor (Potential)	-	-	-	-			1.15385	0.39146	0.364429	0.635571	homo
OR52N2	9606.ENSP00000322801	OL	287	1	2879756	0.996	NOG48028	Olfactory receptor 52N2; Odorant receptor (Potential)	-	-	-	-			1.57895	0.43623	0.347161	0.652839	homo
OR52N4	9606.ENSP00000323224	OL	287	1	2879756	0.996	NOG44192	Olfactory receptor 52N4 (Olfactory receptor OR11-64); Odorant receptor (Potential)	-	-	-	-			2.3	0.43469	0.286626	0.713374	homo
OR52N5	9606.ENSP00000322866	OL	287	1	2879756	0.996	NOG68125	Olfactory receptor 52N5; Odorant receptor (Potential)	-	-	-	-			1	0.21507	0.21507	0.78493	homo
OR52R1	9606.ENSP00000369742	OL	287	1	2879756	0.996	NOG41309	Olfactory receptor 52R1; Odorant receptor (Potential)	-	-	-	-			1.76923	0.37882	0.284801	0.715199	homo
OR52W1	9606.ENSP00000309673	OL	287	1	2879756	0.996	NOG44016	Olfactory receptor 52W1 (Olfactory receptor OR11-71); Odorant receptor (Potential)	-	-	-	-			1	0.38551	0.38551	0.61449	homo
OR56A1	9606.ENSP00000321246	OL	287	1	2879756	0.996	NOG25303	Olfactory receptor 56A1; Odorant receptor (Potential)	-	-	-	-			2.35	0.44314	0.289073	0.710927	homo
OR56A3	9606.ENSP00000331572	OL	0	0	0	0	NOG40290	Olfactory receptor 56A3; Odorant receptor (Potential)	-	-	-	-			2.31579	0.43497	0.285831	0.714169	homo
OR56A4	9606.ENSP00000328215	OL	287	1	2879756	0.996	NOG25303	Olfactory receptor 56A4; Odorant receptor (Potential)	-	-	-	-			2.35	0.44314	0.289073	0.710927	homo
OR56B1	9606.ENSP00000322939	OL	287	1	2879756	0.996	NOG40164	Olfactory receptor 56B1 (Olfactory receptor OR11-65); Odorant receptor (Potential)	-	-	-	-			1.83333	0.35117	0.259356	0.740644	homo
OR56B4	9606.ENSP00000321196	OL	287	1	2879756	0.996	NOG40832	Olfactory receptor 56B4; Odorant receptor (Potential)	-	-	-	-			2.46154	0.35608	0.226957	0.773043	homo
OR5A1	9606.ENSP00000303096	OL	287	1	2879756	0.996	NOG43073	Olfactory receptor 5A1 (OST181); Odorant receptor (Potential)	-	-	-	-			1.64706	0.38435	0.299483	0.700517	homo
OR5A2	9606.ENSP00000303834	OL	287	1	2879756	0.996	NOG46839	Olfactory receptor 5A2; Odorant receptor (Potential)	-	-	-	-			1.16667	0.27117	0.251054	0.748946	homo
OR5AC2	9606.ENSP00000351466	OL	287	1	2879756	0.996	NOG73470	Olfactory receptor 5AC2 (HSA1); Odorant receptor (Potential)	-	-	-	-			3.66667	0.26585	0.138836	0.861164	homo
OR5AK2	9606.ENSP00000322784	OL	287	1	2879756	0.996	NOG45497	Olfactory receptor 5AK2; Odorant receptor (Potential)	-	-	-	-			2.4	0.39022	0.251886	0.748114	homo
OR5AK3P	9606.ENSP00000322824	OL	0	0	0	0	NOG45497	Olfactory receptor 5AK3; Odorant receptor (Potential)	-	-	-	-			2.4	0.39022	0.251886	0.748114	homo
OR5AN1	9606.ENSP00000320302	OL	287	1	2879756	0.996	NOG127675	Olfactory receptor 5AN1 (Olfactory receptor OR11-244); Odorant receptor (Potential)	-	-	-	-			3.11111	0.41493	0.235243	0.764757	homo
OR5AP2	9606.ENSP00000303111	OL	287	1	2879756	0.996	NOG47896	Olfactory receptor 5AP2; Odorant receptor (Potential)	-	-	-	-			1.17647	0.4325	0.398745	0.601255	homo
OR5AR1	9606.ENSP00000302639	OL	287	1	2879756	0.996	NOG47645	Olfactory receptor 5AR1 (Olfactory receptor OR11-209); Odorant receptor (Potential)	-	-	-	-			1.13333	0.41425	0.389121	0.610879	homo
OR5AS1	9606.ENSP00000324111	OL	287	1	2879756	0.996	NOG42328	Olfactory receptor 5AS1 (Olfactory receptor OR11-168); Odorant receptor (Potential)	-	-	-	-			1.5	0.28147	0.229819	0.770181	homo
OR5AU1	9606.ENSP00000302057	OL	287	1	2879756	0.996	NOG46852	Olfactory receptor 5AU1; Odorant receptor (Potential)	-	-	-	-			1	0.32261	0.32261	0.67739	homo
OR5B12	9606.ENSP00000306657	OL	287	1	2879756	0.996	NOG45899	Olfactory receptor 5B12 (Olfactory receptor OR11-241); Odorant receptor (Potential)	-	-	-	-			5.2	0.41424	0.181656	0.818344	homo
OR5B17	9606.ENSP00000349945	OL	287	1	2879756	0.996	NOG45899	Olfactory receptor 5B17 (Olfactory receptor OR11-237); Odorant receptor (Potential)	-	-	-	-			5.2	0.41424	0.181656	0.818344	homo
OR5B2	9606.ENSP00000303076	OL	287	1	2879756	0.996	NOG45899	Olfactory receptor 5B2 (Olfactory receptor OR11-240) (OST073); Odorant receptor (Potential)	-	-	-	-			5.2	0.41424	0.181656	0.818344	homo
OR5B21	9606.ENSP00000353537	OL	0	0	0	0	NOG71436	olfactory receptor, family 5, subfamily B, member 21; Odorant receptor (Potential)	-	-	-	-			1	0.34088	0.34088	0.65912	homo
OR5B3	9606.ENSP00000308270	OL	287	1	2879756	0.996	NOG45899	Olfactory receptor 5B3 (Olfactory receptor OR11-239); Odorant receptor (Potential)	-	-	-	-			5.2	0.41424	0.181656	0.818344	homo
OR5C1	9606.ENSP00000362784	OL	287	1	2879756	0.996	NOG42277	Olfactory receptor 5C1 (Olfactory receptor 9-F) (OR9-F); Odorant receptor (Potential)	-	-	-	-			1	0.35723	0.35723	0.64277	homo
OR5D13	9606.ENSP00000354800	OL	287	1	2879756	0.996	NOG121374	Olfactory receptor 5D13 (Olfactory receptor OR11-142) (Olfactory receptor OR11-148); Odorant [...]	-	-	-	-			2	0.38029	0.268906	0.731094	homo
OR5D14	9606.ENSP00000334456	OL	287	1	2879756	0.996	NOG145188	Olfactory receptor 5D14 (Olfactory receptor OR11-141); Odorant receptor (Potential)	-	-	-	-			1.23077	0.38982	0.351379	0.648621	homo
OR5D16	9606.ENSP00000367649	OL	287	1	2879756	0.996	NOG145393	Olfactory receptor 5D16 (Olfactory receptor OR11-154); Odorant receptor (Potential)	-	-	-	-			1	0.10754	0.10754	0.89246	homo
OR5D18	9606.ENSP00000335025	OL	287	1	2879756	0.996	NOG133219	Olfactory receptor 5D18 (Olfactory receptor OR11-143); Odorant receptor (Potential)	-	-	-	-			2.53846	0.27585	0.173136	0.826864	homo
OR5F1	9606.ENSP00000278409	OL	287	1	2879756	0.996	NOG73596	Olfactory receptor 5F1 (Olfactory receptor OR11-167) (Olfactory receptor 11-10) (OR11-10); O [...]	-	-	-	-			1.5	0.34303	0.280083	0.719917	homo
OR5H2	9606.ENSP00000347418	OL	287	1	2879756	0.996	NOG40374	Olfactory receptor 5H2; Odorant receptor (Potential)	-	-	-	-			3.2	0.36644	0.204846	0.795154	homo
OR5I1	9606.ENSP00000301532	OL	287	1	2879756	0.996	NOG46580	Olfactory receptor 5I1 (Olfactory receptor OR11-159) (Olfactory receptor-like protein OLF1); [...]	-	-	-	-			1.25	0.41769	0.373593	0.626407	homo
OR5J2	9606.ENSP00000310788	OL	287	1	2879756	0.996	NOG42357	Olfactory receptor 5J2 (Olfactory receptor OR11-266); Odorant receptor (Potential)	-	-	-	-			1.82353	0.41787	0.309446	0.690554	homo
OR5K3	9606.ENSP00000373194	OL	0	0	0	0	NOG44330	olfactory receptor, family 5, subfamily K, member 3; Odorant receptor (Potential)	-	-	-	-			3.29412	0.40478	0.223023	0.776977	homo
OR5K4	9606.ENSP00000347003	OL	0	0	0	0	NOG125919	olfactory receptor, family 5, subfamily K, member 4; Odorant receptor (Potential)	-	-	-	-			1.66667	0.25496	0.197491	0.802509	homo
OR5L1	9606.ENSP00000335529	OL	287	1	2879756	0.996	NOG39978	Olfactory receptor 5L1 (Olfactory receptor OR11-151) (OST262); Odorant receptor (Potential)	-	-	-	-			2.05556	0.43155	0.301	0.699	homo
OR5L2	9606.ENSP00000367650	OL	287	1	2879756	0.996	NOG39978	Olfactory receptor 5L2 (Olfactory receptor OR11-153) (HTPCRX16); Odorant receptor (Potential)	-	-	-	-			2.05556	0.43155	0.301	0.699	homo
OR5M3	9606.ENSP00000312208	OL	287	1	2879756	0.996	NOG46936	Olfactory receptor 5M3 (Olfactory receptor OR11-191); Odorant receptor (Potential)	-	-	-	-			1.53333	0.40811	0.329579	0.670421	homo
OR5M8	9606.ENSP00000323354	OL	287	1	2879756	0.996	NOG46524	Olfactory receptor 5M8 (Olfactory receptor OR11-194); Odorant receptor (Potential)	-	-	-	-			1.76923	0.35716	0.268516	0.731484	homo
OR5M9	9606.ENSP00000279791	OL	287	1	2879756	0.996	NOG77483	Olfactory receptor 5M9 (Olfactory receptor OR11-190); Odorant receptor (Potential)	-	-	-	-			1.53333	0.37586	0.303535	0.696465	homo
OR5P2	9606.ENSP00000331823	OL	287	1	2879756	0.996	NOG42406	Olfactory receptor 5P2 (Olfactory receptor-like protein JCG3); Odorant receptor (Potential). [...]	-	-	-	-			5.33333	0.37779	0.163588	0.836412	homo
OR5P3	9606.ENSP00000332068	OL	287	1	2879756	0.996	NOG41250	Olfactory receptor 5P3 (Olfactory receptor-like protein JCG1); Odorant receptor (Potential). [...]	-	-	-	-			3.10526	0.39891	0.226374	0.773626	homo
OR5R1	9606.ENSP00000308595	OL	287	1	2879756	0.996	NOG146677	Olfactory receptor 5R1 (Olfactory receptor OR11-185); Odorant receptor (Potential)	-	-	-	-			1.55556	0.2903	0.232757	0.767243	homo
OR5T1	9606.ENSP00000323612	OL	287	1	2879756	0.996	NOG40304	Olfactory receptor 5T1 (Olfactory receptor OR11-179); Odorant receptor (Potential)	-	-	-	-			1.82353	0.41093	0.304307	0.695693	homo
OR5T2	9606.ENSP00000323688	OL	287	1	2879756	0.996	NOG41770	Olfactory receptor 5T2; Odorant receptor (Potential)	-	-	-	-			2	0.29517	0.208717	0.791283	homo
OR5T3	9606.ENSP00000305403	OL	287	1	2879756	0.996	NOG40304	Olfactory receptor 5T3; Odorant receptor (Potential)	-	-	-	-			1.82353	0.41093	0.304307	0.695693	homo
OR5W2	9606.ENSP00000342448	OL	287	1	2879756	0.996	NOG40895	Olfactory receptor 5W2 (Olfactory receptor OR11-155); Odorant receptor (Potential)	-	-	-	-			4.15789	0.36906	0.180992	0.819008	homo
OR6A2	9606.ENSP00000330384	OL	287	1	2879756	0.996	NOG48149	Olfactory receptor 6A2 (Olfactory receptor OR11-83) (Olfactory receptor 11-55) (OR11-55) (hP [...]	-	-	-	-			2.38095	0.44725	0.289851	0.710149	homo
OR6B2	9606.ENSP00000328013	OL	287	1	2879756	0.996	NOG47186	Olfactory receptor 6B2 (Olfactory receptor OR2-1); Odorant receptor (Potential)	-	-	-	-			1.81818	0.34911	0.258907	0.741093	homo
OR6B3	9606.ENSP00000322435	OL	287	1	2879756	0.996	NOG47186	Olfactory receptor 6B3 (Olfactory receptor OR2-2); Odorant receptor (Potential)	-	-	-	-			1.81818	0.34911	0.258907	0.741093	homo
OR6C1	9606.ENSP00000368990	OL	287	1	2879756	0.996	NOG82448	Olfactory receptor 6C1 (OST267); Odorant receptor (Potential)	-	-	-	-			1.88235	0.42	0.306125	0.693875	homo
OR6C2	9606.ENSP00000323606	OL	287	1	2879756	0.996	NOG43260	Olfactory receptor 6C2 (HSA3); Odorant receptor (Potential)	-	-	-	-			7.68421	0.42721	0.154114	0.845886	homo
OR6C3	9606.ENSP00000368989	OL	287	1	2879756	0.996	NOG41836	Olfactory receptor 6C3 (HSA8); Odorant receptor (Potential)	-	-	-	-			2.58333	0.34311	0.213473	0.786527	homo
OR6C4	9606.ENSP00000323499	OL	287	1	2879756	0.996	NOG41315	Olfactory receptor 6C4; Odorant receptor (Potential)	-	-	-	-			2.44444	0.43217	0.276417	0.723583	homo
OR6C6	9606.ENSP00000351211	OL	0	0	0	0	NOG79829	olfactory receptor, family 6, subfamily C, member 6; Odorant receptor (Potential)	-	-	-	-			3.16667	0.40434	0.227219	0.772781	homo
OR6C65	9606.ENSP00000368986	OL	0	0	0	0	NOG147390	olfactory receptor, family 6, subfamily C, member 65; Odorant receptor (Potential)	-	-	-	-			1.125	0.31698	0.298852	0.701148	homo
OR6C68	9606.ENSP00000368983	OL	0	0	0	0	NOG150258	olfactory receptor, family 6, subfamily C, member 68; Odorant receptor (Potential)	-	-	-	-			2.07692	0.37445	0.259827	0.740173	homo
OR6C70	9606.ENSP00000329153	OL	0	0	0	0	NOG145553	olfactory receptor, family 6, subfamily C, member 70; Odorant receptor (Potential)	-	-	-	-			1.61538	0.38267	0.301084	0.698916	homo
OR6C74	9606.ENSP00000342836	OL	0	0	0	0	NOG149956	olfactory receptor, family 6, subfamily C, member 74; Odorant receptor (Potential)	-	-	-	-			1.33333	0.3713	0.321556	0.678444	homo
OR6C75	9606.ENSP00000368987	OL	0	0	0	0	NOG151135	olfactory receptor, family 6, subfamily C, member 75; Odorant receptor (Potential)	-	-	-	-			1.93333	0.3968	0.285377	0.714623	homo
OR6C76	9606.ENSP00000328402	OL	0	0	0	0	NOG151268	olfactory receptor, family 6, subfamily C, member 76; Odorant receptor (Potential)	-	-	-	-			1.45455	0.35786	0.296721	0.703279	homo
OR6F1	9606.ENSP00000305640	OL	287	1	2879756	0.996	NOG146470	Olfactory receptor 6F1 (Olfactory receptor OR1-38); Odorant receptor (Potential)	-	-	-	-			1.42857	0.39618	0.331468	0.668532	homo
OR6K2	9606.ENSP00000352626	OL	287	1	2879756	0.996	NOG86364	Olfactory receptor 6K2; Odorant receptor (Potential)	-	-	-	-			1.1	0.35246	0.336057	0.663943	homo
OR6K3	9606.ENSP00000357128	OL	287	1	2879756	0.996	NOG124413	Olfactory receptor 6K3; Odorant receptor (Potential)	-	-	-	-			1.5	0.39678	0.32397	0.67603	homo
OR6K6	9606.ENSP00000357126	OL	287	1	2879756	0.996	NOG46470	Olfactory receptor 6K6; Odorant receptor (Potential)	-	-	-	-			1	0.38551	0.38551	0.61449	homo
OR6X1	9606.ENSP00000333724	OL	287	1	2879756	0.996	NOG42217	Olfactory receptor 6X1 (Olfactory receptor OR11-270); Odorant receptor (Potential)	-	-	-	-			1.78571	0.33929	0.253902	0.746098	homo
OR6N1	9606.ENSP00000335535	OL	287	1	2879756	0.996	NOG45732	Olfactory receptor 6N1; Odorant receptor (Potential)	-	-	-	-			1.31579	0.44776	0.390348	0.609652	homo
OR6N2	9606.ENSP00000344101	OL	287	1	2879756	0.996	NOG45732	Olfactory receptor 6N2; Odorant receptor (Potential)	-	-	-	-			1.31579	0.44776	0.390348	0.609652	homo
OR6P1	9606.ENSP00000334721	OL	287	1	2879756	0.996	NOG40033	Olfactory receptor 6P1 (Olfactory receptor OR1-12); Odorant receptor (Potential)	-	-	-	-			1.27273	0.36334	0.322066	0.677934	homo
OR6Q1	9606.ENSP00000307734	OL	287	1	2879756	0.996	NOG146612	Olfactory receptor 6Q1; Odorant receptor (Potential)	-	-	-	-			1	0.34088	0.34088	0.65912	homo
OR6S1	9606.ENSP00000313110	OL	287	1	2879756	0.996	NOG150844	Olfactory receptor 6S1; Odorant receptor (Potential)	-	-	-	-			1.13333	0.40947	0.384631	0.615369	homo
OR6T1	9606.ENSP00000325203	OL	287	1	2879756	0.996	NOG76274	Olfactory receptor 6T1; Odorant receptor (Potential)	-	-	-	-			1.4	0.22885	0.193414	0.806586	homo
OR6Y1	9606.ENSP00000304807	OL	287	1	2879756	0.996	NOG45783	Olfactory receptor 6Y1 (Olfactory receptor OR1-11); Odorant receptor (Potential)	-	-	-	-			1	0.38551	0.38551	0.61449	homo
OR7A10	9606.ENSP00000248058	OL	287	1	2879756	0.996	NOG147368	Olfactory receptor 7A10 (Olfactory receptor OR19-18) (OST027); Odorant receptor (Potential)	-	-	-	-			3.15385	0.36135	0.203473	0.796527	homo
OR7A17	9606.ENSP00000328144	OL	287	1	2879756	0.996	NOG147368	Olfactory receptor 7A17; Odorant receptor (Potential)	-	-	-	-			3.15385	0.36135	0.203473	0.796527	homo
OR7A2P	9606.ENSP00000307397	OL	0	0	0	0	-	-	-	-	-	-			-	-	-	NA	homo
OR7A5	9606.ENSP00000316955	OL	287	1	2879756	0.996	NOG150292	Olfactory receptor 7A5 (Olfactory receptor OR19-17) (Olfactory receptor TPCR92); Odorant rec [...]	-	-	-	-			5.28571	0.44183	0.192178	0.807822	homo
OR7C1	9606.ENSP00000248073	OL	287	1	2879756	0.996	NOG41548	Olfactory receptor 7C1 (Olfactory receptor TPCR86); Odorant receptor (Potential)	-	-	-	-			2.70588	0.38843	0.236134	0.763866	homo
OR7C2	9606.ENSP00000369336	OL	287	1	2879756	0.996	NOG41548	Olfactory receptor 7C2 (Olfactory receptor 19-18) (OR19-18); Odorant receptor (Potential)	-	-	-	-			2.70588	0.38843	0.236134	0.763866	homo
OR7D2	9606.ENSP00000345563	OL	0	0	0	0	NOG147682	Olfactory receptor 7D2 (Olfactory receptor 19-4) (OR19-4) (HTPCRH03); Odorant receptor (Potential)	-	-	-	-			1	0.34088	0.34088	0.65912	homo
OR7D4	9606.ENSP00000310488	OL	287	1	2879756	0.996	NOG150292	Olfactory receptor 7D4 (Olfactory receptor OR19-7); Odorant receptor. Selectively activated [...]	-	-	-	-			5.28571	0.44183	0.192178	0.807822	homo
OR7G1	9606.ENSP00000293614	OL	287	1	2879756	0.996	NOG80984	Olfactory receptor 7G1 (Olfactory receptor 19-15) (OR19-15); Odorant receptor (Potential)	-	-	-	-			6.44444	0.22391	0.0882025	0.911797	homo
OR7G2	9606.ENSP00000303822	OL	287	1	2879756	0.996	NOG128713	Olfactory receptor 7G2 (Olfactory receptor 19-13) (OR19-13) (OST260); Odorant receptor (Potential)	-	-	-	-			4.36364	0.33374	0.159766	0.840234	homo
OR7G3	9606.ENSP00000302867	OL	287	1	2879756	0.996	NOG128713	Olfactory receptor 7G3 (OST085); Odorant receptor (Potential)	-	-	-	-			4.36364	0.33374	0.159766	0.840234	homo
OR8A1	9606.ENSP00000284287	OL	287	1	2879756	0.996	NOG145371	Olfactory receptor 8A1 (OST025); Odorant receptor (Potential)	-	-	-	-			1.64286	0.37653	0.293764	0.706236	homo
OR8B12	9606.ENSP00000307159	OL	287	1	2879756	0.996	NOG44152	Olfactory receptor 8B12 (Olfactory receptor OR11-317); Odorant receptor (Potential)	-	-	-	-			2.29412	0.41746	0.275618	0.724382	homo
OR8B2	9606.ENSP00000364152	OL	0	0	0	0	NOG44371	Olfactory receptor 8B2; Odorant receptor (Potential)	-	-	-	-			5.625	0.35322	0.148931	0.851069	homo
OR8B3	9606.ENSP00000346611	OL	287	1	2879756	0.996	NOG44371	Olfactory receptor 8B3; Odorant receptor (Potential)	-	-	-	-			5.625	0.35322	0.148931	0.851069	homo
OR8B4	9606.ENSP00000348449	OL	287	1	2879756	0.996	NOG75803	Olfactory receptor 8B4; Odorant receptor (Potential)	-	-	-	-			1.07692	0.39407	0.379736	0.620264	homo
OR8B8	9606.ENSP00000330280	OL	287	1	2879756	0.996	NOG44152	Olfactory receptor 8B8 (Olfactory receptor TPCR85) (Olfactory-like receptor JCG8); Odorant r [...]	-	-	-	-			2.29412	0.41746	0.275618	0.724382	homo
OR8D1	9606.ENSP00000350474	OL	287	1	2879756	0.996	NOG44891	Olfactory receptor 8D1 (Olfactory receptor OR11-301) (Olfactory receptor-like protein JCG9) [...]	-	-	-	-			4	0.20946	0.10473	0.89527	homo
OR8D2	9606.ENSP00000350022	OL	287	1	2879756	0.996	NOG130634	Olfactory receptor 8D2 (Olfactory receptor-like protein JCG2); Odorant receptor (Potential). [...]	-	-	-	-			1.25	0.37171	0.332468	0.667532	homo
OR8D4	9606.ENSP00000325381	OL	287	1	2879756	0.996	NOG123563	Olfactory receptor 8D4; Odorant receptor (Potential)	-	-	-	-			1.53333	0.37788	0.305166	0.694834	homo
OR8G1	9606.ENSP00000344453	OL	0	0	0	0	NOG124373	Olfactory receptor 8G1 (Olfactory receptor OR11-281) (Olfactory receptor TPCR25); Odorant re [...]	-	-	-	-			4.85	0.3752	0.17037	0.82963	homo
OR8H1	9606.ENSP00000323595	OL	0	0	0	0	NOG78193	Olfactory receptor 8H1 (Olfactory receptor OR11-180); Odorant receptor (Potential)	-	-	-	-			1.875	0.39768	0.290424	0.709576	homo
OR8H2	9606.ENSP00000323982	OL	0	0	0	0	NOG45310	Olfactory receptor 8H2 (Olfactory receptor OR11-171); Odorant receptor (Potential)	-	-	-	-			3.86667	0.30134	0.153246	0.846754	homo
OR8H3	9606.ENSP00000323928	OL	0	0	0	0	NOG45310	Olfactory receptor 8H3 (Olfactory receptor OR11-172); Odorant receptor (Potential)	-	-	-	-			3.86667	0.30134	0.153246	0.846754	homo
OR8I2	9606.ENSP00000303864	OL	0	0	0	0	NOG147617	Olfactory receptor 8I2 (Olfactory receptor OR11-170); Odorant receptor (Potential)	-	-	-	-			1.2	0.34967	0.319204	0.680796	homo
OR8J1	9606.ENSP00000304060	OL	0	0	0	0	NOG40548	Olfactory receptor 8J1 (Olfactory receptor OR11-183); Odorant receptor (Potential)	-	-	-	-			2.15	0.43903	0.299416	0.700584	homo
OR8J3	9606.ENSP00000301529	OL	0	0	0	0	NOG40548	Olfactory receptor 8J3; Odorant receptor (Potential)	-	-	-	-			2.15	0.43903	0.299416	0.700584	homo
OR8K1	9606.ENSP00000279783	OL	0	0	0	0	NOG46490	Olfactory receptor 8K1 (Olfactory receptor OR11-182); Odorant receptor (Potential)	-	-	-	-			1.16667	0.3787	0.350608	0.649392	homo
OR8K3	9606.ENSP00000323555	OL	0	0	0	0	NOG129290	Olfactory receptor 8K3 (Olfactory receptor OR11-181); Odorant receptor (Potential)	-	-	-	-			5.76471	0.33176	0.138177	0.861823	homo
OR8K5	9606.ENSP00000323853	OL	0	0	0	0	NOG125539	Olfactory receptor 8K5; Odorant receptor (Potential)	-	-	-	-			2.66667	0.34534	0.211477	0.788523	homo
OR8S1	9606.ENSP00000310632	OL	0	0	0	0	NOG77860	Olfactory receptor 8S1; Odorant receptor (Potential)	-	-	-	-			3	0.38451	0.221997	0.778003	homo
OR8U1	9606.ENSP00000304188	OL	0	0	0	0	NOG43965	Olfactory receptor 8U1; Odorant receptor (Potential)	-	-	-	-			1.83333	0.42395	0.313108	0.686892	homo
OR8U1	9606.ENSP00000304188	OL	0	0	0	0	NOG43965	Olfactory receptor 8U1; Odorant receptor (Potential)	-	-	-	-			1.83333	0.42395	0.313108	0.686892	homo
OR9A2	9606.ENSP00000316518	OL	0	0	0	0	NOG119442	Olfactory receptor 9A2 (Olfactory receptor OR7-2); Odorant receptor (Potential)	-	-	-	-			2.07692	0.36804	0.255379	0.744621	homo
OR9G1	9606.ENSP00000309012	OL	0	0	0	0	NOG46352	Olfactory receptor 9G1; Odorant receptor (Potential)	-	-	-	-			2	0.40425	0.285848	0.714152	homo
OR9G4	9606.ENSP00000307515	OL	0	0	0	0	NOG43438	Olfactory receptor 9G4; Odorant receptor (Potential)	-	-	-	-			1.53333	0.40458	0.326728	0.673272	homo
OR9G1	9606.ENSP00000309012	OL	0	0	0	0	NOG46352	Olfactory receptor 9G1; Odorant receptor (Potential)	-	-	-	-			2	0.40425	0.285848	0.714152	homo
OR9I1	9606.ENSP00000302606	OL	0	0	0	0	NOG44332	Olfactory receptor 9I1; Odorant receptor (Potential)	-	-	-	-			1.9375	0.40137	0.288353	0.711647	homo
OR9K2	9606.ENSP00000307598	OL	0	0	0	0	NOG39616	Olfactory receptor 9K2; Odorant receptor (Potential)	-	-	-	-			2.2	0.44684	0.301259	0.698741	homo
OR9Q1	9606.ENSP00000334934	OL	0	0	0	0	NOG44319	Olfactory receptor 9Q1; Odorant receptor (Potential)	-	-	-	-			1.06667	0.4167	0.403467	0.596533	homo
OR9Q2	9606.ENSP00000308714	OL	0	0	0	0	NOG47340	Olfactory receptor 9Q2; Odorant receptor (Potential)	-	-	-	-			1.07143	0.40579	0.39203	0.60797	homo
ADCY3	9606.ENSP00000260600	OL-AC	115	0.3204	966957	0.4812	-	-	KOG3619	Adenylate cyclase type 3 (EC 4.6.1.1) (Adenylate cyclase type III) (ATP pyrophosphate-lyase [...]	COG2114	Adenylate cyclase type 3 (EC 4.6.1.1) (Adenylate cyclase type III) (ATP pyrophosphate-lyase [...]			7.94595	0.86441	0.306653	0.693347	homo
B3GNT2	9606.ENSP00000305595	OL-AC	16	0.975	191875	0.7585	-	-	KOG2287	UDP-GlcNAc:betaGal beta-1,3-N-acetylglucosaminyltransferase 2 (EC 2.4.1.-) (Beta3Gn-T1) (BGn [...]	-	-			11.1842	0.86453	0.25851	0.74149	homo
BBS4	9606.ENSP00000268057	OL-AC	8	0.5714	226250	0.9634	-	-	KOG1124	Bardet-Biedl syndrome 4 protein; May be required for the dynein-mediated transport of perice [...]	COG0457	Bardet-Biedl syndrome 4 protein; May be required for the dynein-mediated transport of perice [...]			12.6981	0.9237	0.259216	0.740784	homo
BEST2	9606.ENSP00000042931	OL-AC	0	0	0	0	-	-	KOG3547	Bestrophin-2 (Vitelliform macular dystrophy 2-like protein 1); Forms calcium-sensitive chlor [...]	-	-			3.96875	0.80398	0.40357	0.59643	homo
CNGA2	9606.ENSP00000328478	OL-AC	1	0	180000	0.2876	-	-	KOG0500	Cyclic nucleotide-gated olfactory channel (Cyclic nucleotide-gated cation channel 2) (CNG ch [...]	-	-			3.67568	0.87579	0.456805	0.543195	homo
CNGA4	9606.ENSP00000369268	OL-AC	12	0.5	310000	0.5305	-	-	KOG0500	cyclic nucleotide gated channel alpha 4; Second messenger, cAMP, causes the opening of catio [...]	-	-			3.67568	0.87579	0.456805	0.543195	homo
CNGB1	9606.ENSP00000251102	OL-AC	18	0.2876	274444	0.554	-	-	KOG0499	Cyclic nucleotide-gated cation channel 4 (CNG channel 4) (CNG-4) (CNG4) (Cyclic nucleotide-g [...]	-	-			2.32353	0.82839	0.543451	0.456549	homo
DRD2	9606.ENSP00000347474	OL-AC	8	0.1786	547500	0.2434	-	-	KOG3656	D(2) dopamine receptor (Dopamine D2 receptor); This is one of the five types (D1 to D5) of r [...]	-	-			140.412	0.84789	0.0715546	0.928445	homo
GJB4	9606.ENSP00000345868	OL-AC	0	0	0	0	NOG39157	Gap junction beta-4 protein (Connexin-30.3) (Cx30.3); One gap junction consists of a cluster [...]	-	-	-	-			1.91667	0.4823	0.348372	0.651628	homo
GNAS	9606.ENSP00000302237	OL-AC	133	0.1753	645414	0.5142	-	-	KOG0099	Neuroendocrine secretory protein 55 (NESP55) [Contains: LHAL tetrapeptide; GPIPIRRH peptide] [...]	-	-			2.11765	0.85792	0.589549	0.410451	homo
GRM7	9606.ENSP00000373352	OL-AC	9	0.6111	237778	0.6596	-	-	KOG1056	Metabotropic glutamate receptor 7 precursor (mGluR7); Receptor for glutamate. The activity o [...]	-	-			41.0882	0.67551	0.105384	0.894616	homo
GRM8	9606.ENSP00000351142	OL-AC	7	1	121429	0.7576	-	-	KOG1056	Metabotropic glutamate receptor 8 precursor (mGluR8); Receptor for glutamate. The activity o [...]	-	-			41.0882	0.67551	0.105384	0.894616	homo
MKKS	9606.ENSP00000246062	OL-AC	0	0	0	0	-	-	KOG0360	McKusick-Kaufman/Bardet-Biedl syndromes putative chaperonin (Bardet- Biedl syndrome 6 protei [...]	COG0459	McKusick-Kaufman/Bardet-Biedl syndromes putative chaperonin (Bardet- Biedl syndrome 6 protei [...]			1.86792	0.95899	0.701673	0.298327	homo
OBP2A	9606.ENSP00000342097	OL-AC	0	0	0	0	NOG130697	Odorant-binding protein 2a precursor (OBPIIa); Probably binds and transports small hydrophob [...]	-	-	-	-			1	0.21507	0.21507	0.78493	homo
OBP2B	9606.ENSP00000361104	OL-AC	0	0	0	0	NOG28920	Odorant-binding protein 2b precursor (OBPIIb); Probably binds and transports small hydrophob [...]	-	-	-	-			1	0.30189	0.30189	0.69811	homo
SLC6A3	9606.ENSP00000270349	OL-AC	1	0	290000	0.1355	-	-	KOG3659	Sodium-dependent dopamine transporter (DA transporter) (DAT); Amine transporter. Terminates [...]	COG0733	Sodium-dependent dopamine transporter (DA transporter) (DAT); Amine transporter. Terminates [...]			8.58333	0.87023	0.297034	0.702966	homo
ZNF650	9606.ENSP00000272793	OL-AC	0	0	0	0	-	-	KOG1139	Zinc finger protein 650; E3 ubiquitin-protein ligase which is a component of the N-end rule [...]	-	-			1.54054	0.87658	0.706244	0.293756	homo
UGT2A1	9606.ENSP00000286604	OL-AC	53	0.3861	354906	0.501	-	-	KOG1192	UDP-glucuronosyltransferase 2A1 precursor (EC 2.4.1.17); UDP-glucuronosyltransferases cataly [...]	COG1819	UDP-glucuronosyltransferase 2A1 precursor (EC 2.4.1.17); UDP-glucuronosyltransferases cataly [...]			15.0682	0.79666	0.205231	0.794769	homo
Olfr1	10090.ENSMUSP00000090601	OL	0	0	0	0	NOG44681	olfactory receptor 1; Odorant receptor. Activated by a lily-derived aldehyde as well as othe [...]	-	-	-	-	65	21	3.09524	0.42959	0.244178	0.755822	mus
Olfr10	10090.ENSMUSP00000073963	OL	0	0	0	0	NOG39798	olfactory receptor 10; Odorant receptor (Potential)	-	-	-	-	58	16	3.625	0.3336	0.175215	0.824785	mus
Olfr734	10090.ENSMUSP00000057376	OL	270	1	2711963	0.9938	NOG67996	olfactory receptor 734	-	-	-	-	17	16	1.0625	0.4269	0.414154	0.585846	mus
Olfr1000	10090.ENSMUSP00000097505	OL	0	0	0	0	NOG47957	olfactory receptor 1000	-	-	-	-	14	6	2.33333	0.24721	0.161837	0.838163	mus
Olfr1002	10090.ENSMUSP00000097504	OL	0	0	0	0	NOG77729	olfactory receptor 1002; Potential odorant receptor	-	-	-	-	22	12	1.83333	0.36463	0.269297	0.730703	mus
Olfr1006	10090.ENSMUSP00000097501	OL	0	0	0	0	NOG43438	olfactory receptor 1006	-	-	-	-	23	15	1.53333	0.40458	0.326728	0.673272	mus
Olfr1008	10090.ENSMUSP00000061191	OL	0	0	0	0	NOG125539	olfactory receptor 1008	-	-	-	-	40	15	2.66667	0.34534	0.211477	0.788523	mus
Olfr1009	10090.ENSMUSP00000061475	OL	0	0	0	0	NOG77729	olfactory receptor 1009; Potential odorant receptor	-	-	-	-	22	12	1.83333	0.36463	0.269297	0.730703	mus
Olfr101	10090.ENSMUSP00000094935	OL	0	0	0	0	NOG78202	olfactory receptor 101	-	-	-	-	61	17	3.58824	0.40807	0.215424	0.784576	mus
Olfr1012	10090.ENSMUSP00000097500	OL	0	0	0	0	NOG46352	olfactory receptor 1012	-	-	-	-	34	17	2	0.40425	0.285848	0.714152	mus
Olfr1013	10090.ENSMUSP00000068173	OL	0	0	0	0	NOG46352	olfactory receptor 1013	-	-	-	-	34	17	2	0.40425	0.285848	0.714152	mus
Olfr1014	10090.ENSMUSP00000075600	OL	0	0	0	0	NOG46352	olfactory receptor 1014	-	-	-	-	34	17	2	0.40425	0.285848	0.714152	mus
Olfr1015	10090.ENSMUSP00000046301	OL	0	0	0	0	NOG147377	olfactory receptor 1015	-	-	-	-	3	3	1	0.17044	0.17044	0.82956	mus
Olfr1016	10090.ENSMUSP00000097499	OL	0	0	0	0	NOG46352	olfactory receptor 1016	-	-	-	-	34	17	2	0.40425	0.285848	0.714152	mus
Olfr1018	10090.ENSMUSP00000050833	OL	0	0	0	0	NOG78955	olfactory receptor 1018	-	-	-	-	8	7	1.14286	0.29572	0.27662	0.72338	mus
Olfr635	10090.ENSMUSP00000095788	OL	270	1	2711963	0.9938	NOG46377	olfactory receptor 635	-	-	-	-	25	15	1.66667	0.40686	0.315152	0.684848	mus
Olfr47	10090.ENSMUSP00000077204	OL	0	0	0	0	NOG45258	olfactory receptor 47	-	-	-	-	30	12	2.5	0.34838	0.220335	0.779665	mus
Olfr1020	10090.ENSMUSP00000058242	OL	270	1	2711963	0.9938	NOG47896	olfactory receptor 1020; Potential odorant receptor	-	-	-	-	20	17	1.17647	0.4325	0.398745	0.601255	mus
Olfr1022	10090.ENSMUSP00000059312	OL	0	0	0	0	NOG40421	olfactory receptor 1022	-	-	-	-	11	7	1.57143	0.29381	0.234379	0.765621	mus
Olfr1023	10090.ENSMUSP00000059849	OL	0	0	0	0	NOG40421	olfactory receptor 1023	-	-	-	-	11	7	1.57143	0.29381	0.234379	0.765621	mus
Olfr1024	10090.ENSMUSP00000097496	OL	0	0	0	0	NOG127781	olfactory receptor 1024	-	-	-	-	3	3	1	0.17044	0.17044	0.82956	mus
Olfr1026	10090.ENSMUSP00000049887	OL	0	0	0	0	NOG147067	olfactory receptor 1026	-	-	-	-	9	6	1.5	0.26919	0.219793	0.780207	mus
Olfr1029	10090.ENSMUSP00000080828	OL	0	0	0	0	NOG84714	olfactory receptor 1029	-	-	-	-	19	13	1.46154	0.38034	0.314606	0.685394	mus
Olfr103	10090.ENSMUSP00000094934	OL	0	0	0	0	NOG78202	olfactory receptor 103	-	-	-	-	61	17	3.58824	0.40807	0.215424	0.784576	mus
Olfr1030	10090.ENSMUSP00000053309	OL	0	0	0	0	NOG84714	olfactory receptor 1030; Potential odorant receptor	-	-	-	-	19	13	1.46154	0.38034	0.314606	0.685394	mus
Olfr1031	10090.ENSMUSP00000059256	OL	270	1	2711963	0.9938	NOG46524	olfactory receptor 1031	-	-	-	-	23	13	1.76923	0.35716	0.268516	0.731484	mus
Olfr1032	10090.ENSMUSP00000054494	OL	270	1	2711963	0.9938	NOG46936	olfactory receptor 1032	-	-	-	-	23	15	1.53333	0.40811	0.329579	0.670421	mus
Olfr1033	10090.ENSMUSP00000058779	OL	270	1	2711963	0.9938	NOG46936	olfactory receptor 1033	-	-	-	-	23	15	1.53333	0.40811	0.329579	0.670421	mus
Olfr1034	10090.ENSMUSP00000078279	OL	270	1	2711963	0.9938	NOG77483	olfactory receptor 1034	-	-	-	-	23	15	1.53333	0.37586	0.303535	0.696465	mus
Olfr1036	10090.ENSMUSP00000080065	OL	270	1	2711963	0.9938	NOG77483	olfactory receptor 1036	-	-	-	-	23	15	1.53333	0.37586	0.303535	0.696465	mus
Olfr1037	10090.ENSMUSP00000097495	OL	0	0	0	0	NOG78193	olfactory receptor 1037	-	-	-	-	30	16	1.875	0.39768	0.290424	0.709576	mus
Olfr1039	10090.ENSMUSP00000097494	OL	0	0	0	0	NOG146787	olfactory receptor 1039	-	-	-	-	12	7	1.71429	0.27121	0.20714	0.79286	mus
Olfr104	10090.ENSMUSP00000078869	OL	0	0	0	0	NOG78202	olfactory receptor 104	-	-	-	-	61	17	3.58824	0.40807	0.215424	0.784576	mus
Olfr1040	10090.ENSMUSP00000097493	OL	0	0	0	0	NOG146787	olfactory receptor 1040	-	-	-	-	12	7	1.71429	0.27121	0.20714	0.79286	mus
Olfr1042	10090.ENSMUSP00000097492	OL	0	0	0	0	NOG146787	olfactory receptor 1042	-	-	-	-	12	7	1.71429	0.27121	0.20714	0.79286	mus
Olfr1043	10090.ENSMUSP00000097491	OL	0	0	0	0	NOG146787	olfactory receptor 1043	-	-	-	-	12	7	1.71429	0.27121	0.20714	0.79286	mus
Olfr1044	10090.ENSMUSP00000097490	OL	0	0	0	0	NOG43965	olfactory receptor 1044; Potential odorant receptor	-	-	-	-	33	18	1.83333	0.42395	0.313108	0.686892	mus
Olfr1045	10090.ENSMUSP00000097488	OL	0	0	0	0	NOG40548	olfactory receptor 1045	-	-	-	-	43	20	2.15	0.43903	0.299416	0.700584	mus
Olfr1046	10090.ENSMUSP00000097486	OL	0	0	0	0	NOG46490	olfactory receptor 1046	-	-	-	-	14	12	1.16667	0.3787	0.350608	0.649392	mus
Olfr1047	10090.ENSMUSP00000097485	OL	0	0	0	0	NOG129290	olfactory receptor 1047	-	-	-	-	98	17	5.76471	0.33176	0.138177	0.861823	mus
Olfr1048	10090.ENSMUSP00000097484	OL	0	0	0	0	NOG125539	olfactory receptor 1048	-	-	-	-	40	15	2.66667	0.34534	0.211477	0.788523	mus
Olfr1049	10090.ENSMUSP00000097483	OL	0	0	0	0	NOG125539	olfactory receptor 1049	-	-	-	-	40	15	2.66667	0.34534	0.211477	0.788523	mus
Olfr105	10090.ENSMUSP00000072951	OL	0	0	0	0	NOG78202	olfactory receptor 105	-	-	-	-	61	17	3.58824	0.40807	0.215424	0.784576	mus
Olfr1051	10090.ENSMUSP00000097482	OL	0	0	0	0	NOG125539	olfactory receptor 1051	-	-	-	-	40	15	2.66667	0.34534	0.211477	0.788523	mus
Olfr1052	10090.ENSMUSP00000058454	OL	270	1	2711963	0.9938	NOG42357	olfactory receptor 1052; Potential odorant receptor	-	-	-	-	31	17	1.82353	0.41787	0.309446	0.690554	mus
Olfr1054	10090.ENSMUSP00000097480	OL	0	0	0	0	NOG145161	olfactory receptor 1054	-	-	-	-	4	3	1.33333	0.1613	0.13969	0.86031	mus
Olfr1055	10090.ENSMUSP00000097479	OL	0	0	0	0	NOG148487	olfactory receptor 1055	-	-	-	-	8	6	1.33333	0.26884	0.232823	0.767177	mus
Olfr1056	10090.ENSMUSP00000097478	OL	0	0	0	0	NOG148487	olfactory receptor 1056	-	-	-	-	8	6	1.33333	0.26884	0.232823	0.767177	mus
Olfr1057	10090.ENSMUSP00000097477	OL	0	0	0	0	NOG40548	olfactory receptor 1062	-	-	-	-	43	20	2.15	0.43903	0.299416	0.700584	mus
Olfr1058	10090.ENSMUSP00000099691	OL	0	0	0	0	NOG129290	olfactory receptor 1058	-	-	-	-	98	17	5.76471	0.33176	0.138177	0.861823	mus
Olfr106	10090.ENSMUSP00000071701	OL	0	0	0	0	NOG78202	olfactory receptor 106	-	-	-	-	61	17	3.58824	0.40807	0.215424	0.784576	mus
Olfr802	10090.ENSMUSP00000074275	OL	270	1	2711963	0.9938	NOG82448	olfactory receptor 802	-	-	-	-	32	17	1.88235	0.42	0.306125	0.693875	mus
Olfr1061	10090.ENSMUSP00000097474	OL	0	0	0	0	NOG129290	olfactory receptor 1515	-	-	-	-	98	17	5.76471	0.33176	0.138177	0.861823	mus
Olfr73	10090.ENSMUSP00000097426	OL	0	0	0	0	NOG133219	olfactory receptor 73	-	-	-	-	33	13	2.53846	0.27585	0.173136	0.826864	mus
Olfr506	10090.ENSMUSP00000076566	OL	0	0	0	0	NOG42406	olfactory receptor 506	-	-	-	-	112	21	5.33333	0.37779	0.163588	0.836412	mus
Olfr1066	10090.ENSMUSP00000097470	OL	0	0	0	0	NOG129290	olfactory receptor 1066	-	-	-	-	98	17	5.76471	0.33176	0.138177	0.861823	mus
Olfr107	10090.ENSMUSP00000076267	OL	0	0	0	0	NOG87706	olfactory receptor 107	-	-	-	-	16	3	5.33333	0.14693	0.0636226	0.936377	mus
Olfr808	10090.ENSMUSP00000059714	OL	0	0	0	0	NOG147390	olfactory receptor 808	-	-	-	-	9	8	1.125	0.31698	0.298852	0.701148	mus
Olfr1076	10090.ENSMUSP00000075612	OL	0	0	0	0	NOG129290	olfactory receptor 1076	-	-	-	-	98	17	5.76471	0.33176	0.138177	0.861823	mus
Olfr1079	10090.ENSMUSP00000097467	OL	0	0	0	0	NOG129290	olfactory receptor 1079	-	-	-	-	98	17	5.76471	0.33176	0.138177	0.861823	mus
Olfr108	10090.ENSMUSP00000077337	OL	0	0	0	0	NOG87706	olfactory receptor 108	-	-	-	-	16	3	5.33333	0.14693	0.0636226	0.936377	mus
Olfr1080	10090.ENSMUSP00000097466	OL	0	0	0	0	NOG129290	olfactory receptor 1080	-	-	-	-	98	17	5.76471	0.33176	0.138177	0.861823	mus
Olfr1352	10090.ENSMUSP00000054355	OL	0	0	0	0	NOG150292	olfactory receptor 1352	-	-	-	-	111	21	5.28571	0.44183	0.192178	0.807822	mus
Olfr1084	10090.ENSMUSP00000097465	OL	0	0	0	0	NOG129290	olfactory receptor 1084	-	-	-	-	98	17	5.76471	0.33176	0.138177	0.861823	mus
Olfr514	10090.ENSMUSP00000081807	OL	0	0	0	0	NOG150795	olfactory receptor 514	-	-	-	-	47	19	2.47368	0.41471	0.263677	0.736323	mus
Olfr1086	10090.ENSMUSP00000097463	OL	270	1	2711963	0.9938	NOG41770	olfactory receptor 1086; Potential odorant receptor	-	-	-	-	18	9	2	0.29517	0.208717	0.791283	mus
Olfr1087	10090.ENSMUSP00000097462	OL	0	0	0	0	NOG129290	olfactory receptor 1087	-	-	-	-	98	17	5.76471	0.33176	0.138177	0.861823	mus
Olfr1089	10090.ENSMUSP00000097461	OL	0	0	0	0	NOG129290	olfactory receptor 1089	-	-	-	-	98	17	5.76471	0.33176	0.138177	0.861823	mus
Olfr109	10090.ENSMUSP00000031086	OL	0	0	0	0	NOG78202	olfactory receptor 109	-	-	-	-	61	17	3.58824	0.40807	0.215424	0.784576	mus
Olfr1090	10090.ENSMUSP00000097460	OL	0	0	0	0	NOG129290	olfactory receptor 1090	-	-	-	-	98	17	5.76471	0.33176	0.138177	0.861823	mus
Olfr1093	10090.ENSMUSP00000049733	OL	0	0	0	0	NOG40304	olfactory receptor 1093	-	-	-	-	31	17	1.82353	0.41093	0.304307	0.695693	mus
Olfr1094	10090.ENSMUSP00000052802	OL	270	1	2711963	0.9938	NOG40304	olfactory receptor 1094; Potential odorant receptor	-	-	-	-	31	17	1.82353	0.41093	0.304307	0.695693	mus
Olfr568	10090.ENSMUSP00000095818	OL	270	1	2711963	0.9938	NOG76064	olfactory receptor 568	-	-	-	-	10	9	1.11111	0.33572	0.318492	0.681508	mus
Olfr1097	10090.ENSMUSP00000097458	OL	0	0	0	0	NOG78193	olfactory receptor 1097	-	-	-	-	30	16	1.875	0.39768	0.290424	0.709576	mus
Olfr1098	10090.ENSMUSP00000097457	OL	0	0	0	0	NOG78193	olfactory receptor 1098	-	-	-	-	30	16	1.875	0.39768	0.290424	0.709576	mus
Olfr1099	10090.ENSMUSP00000097456	OL	0	0	0	0	NOG78193	olfactory receptor 1099	-	-	-	-	30	16	1.875	0.39768	0.290424	0.709576	mus
Olfr11	10090.ENSMUSP00000043099	OL	270	1	2711963	0.9938	NOG147018	olfactory receptor 11; Odorant receptor (Potential)	-	-	-	-	4	4	1	0.21507	0.21507	0.78493	mus
Olfr110	10090.ENSMUSP00000055006	OL	0	0	0	0	NOG147928	olfactory receptor 110	-	-	-	-	50	17	2.94118	0.40283	0.234888	0.765112	mus
Olfr1100	10090.ENSMUSP00000092517	OL	0	0	0	0	NOG45310	olfactory receptor 1100	-	-	-	-	58	15	3.86667	0.30134	0.153246	0.846754	mus
Olfr1101	10090.ENSMUSP00000097455	OL	0	0	0	0	NOG41770	olfactory receptor 1101	-	-	-	-	18	9	2	0.29517	0.208717	0.791283	mus
Olfr1102	10090.ENSMUSP00000052861	OL	0	0	0	0	NOG40304	olfactory receptor 1102; Potential odorant receptor	-	-	-	-	31	17	1.82353	0.41093	0.304307	0.695693	mus
Olfr1104	10090.ENSMUSP00000097454	OL	0	0	0	0	NOG147617	olfactory receptor 1104	-	-	-	-	12	10	1.2	0.34967	0.319204	0.680796	mus
Olfr1105	10090.ENSMUSP00000097453	OL	0	0	0	0	NOG150848	olfactory receptor 1105	-	-	-	-	3	3	1	0.17044	0.17044	0.82956	mus
Olfr1106	10090.ENSMUSP00000097452	OL	0	0	0	0	NOG42357	olfactory receptor 1106	-	-	-	-	31	17	1.82353	0.41787	0.309446	0.690554	mus
Olfr1107	10090.ENSMUSP00000097450	OL	0	0	0	0	NOG46809	olfactory receptor 1107	-	-	-	-	25	13	1.92308	0.35463	0.255727	0.744273	mus
Olfr1109	10090.ENSMUSP00000097449	OL	0	0	0	0	NOG46809	olfactory receptor 1109	-	-	-	-	25	13	1.92308	0.35463	0.255727	0.744273	mus
Olfr111	10090.ENSMUSP00000094933	OL	0	0	0	0	NOG147928	olfactory receptor 111	-	-	-	-	50	17	2.94118	0.40283	0.234888	0.765112	mus
Olfr1110	10090.ENSMUSP00000097447	OL	0	0	0	0	NOG46809	olfactory receptor 1110	-	-	-	-	25	13	1.92308	0.35463	0.255727	0.744273	mus
Olfr1111	10090.ENSMUSP00000097446	OL	270	1	2711963	0.9938	NOG42328	olfactory receptor 1111	-	-	-	-	12	8	1.5	0.28147	0.229819	0.770181	mus
Olfr1112	10090.ENSMUSP00000052341	OL	270	1	2711963	0.9938	NOG83565	olfactory receptor 1112	-	-	-	-	9	9	1	0.34088	0.34088	0.65912	mus
Olfr1113	10090.ENSMUSP00000078883	OL	0	0	0	0	NOG147928	olfactory receptor 1113	-	-	-	-	50	17	2.94118	0.40283	0.234888	0.765112	mus
Olfr1115	10090.ENSMUSP00000080647	OL	0	0	0	0	NOG147928	olfactory receptor 1115	-	-	-	-	50	17	2.94118	0.40283	0.234888	0.765112	mus
Olfr112	10090.ENSMUSP00000082684	OL	0	0	0	0	NOG132856	olfactory receptor 112	-	-	-	-	429	22	19.5	0.30323	0.0686681	0.931332	mus
Olfr1120	10090.ENSMUSP00000051931	OL	0	0	0	0	NOG74490	olfactory receptor 1120	-	-	-	-	78	19	4.10526	0.40882	0.201772	0.798228	mus
Olfr1121	10090.ENSMUSP00000058201	OL	0	0	0	0	NOG74490	olfactory receptor 1121	-	-	-	-	78	19	4.10526	0.40882	0.201772	0.798228	mus
Olfr1122	10090.ENSMUSP00000052190	OL	0	0	0	0	NOG74490	olfactory receptor 1122	-	-	-	-	78	19	4.10526	0.40882	0.201772	0.798228	mus
Olfr1123	10090.ENSMUSP00000058786	OL	270	1	2711963	0.9938	NOG74490	olfactory receptor 1123	-	-	-	-	78	19	4.10526	0.40882	0.201772	0.798228	mus
Olfr1124	10090.ENSMUSP00000062513	OL	0	0	0	0	NOG147928	olfactory receptor 1125	-	-	-	-	50	17	2.94118	0.40283	0.234888	0.765112	mus
Olfr1126	10090.ENSMUSP00000071313	OL	0	0	0	0	NOG74490	olfactory receptor 1126	-	-	-	-	78	19	4.10526	0.40882	0.201772	0.798228	mus
Olfr1128	10090.ENSMUSP00000099684	OL	0	0	0	0	NOG118475	olfactory receptor 1128	-	-	-	-	9	6	1.5	0.26017	0.212428	0.787572	mus
Olfr1129	10090.ENSMUSP00000079823	OL	0	0	0	0	NOG74490	olfactory receptor 1129	-	-	-	-	78	19	4.10526	0.40882	0.201772	0.798228	mus
Olfr1083	10090.ENSMUSP00000097464	OL	0	0	0	0	NOG129290	olfactory receptor 1085	-	-	-	-	98	17	5.76471	0.33176	0.138177	0.861823	mus
Olfr1130	10090.ENSMUSP00000078649	OL	0	0	0	0	NOG74490	olfactory receptor 1130	-	-	-	-	78	19	4.10526	0.40882	0.201772	0.798228	mus
Olfr1131	10090.ENSMUSP00000088214	OL	270	1	2711963	0.9938	NOG40895	olfactory receptor 1131	-	-	-	-	79	19	4.15789	0.36906	0.180992	0.819008	mus
Olfr1132	10090.ENSMUSP00000088213	OL	270	1	2711963	0.9938	NOG40895	olfactory receptor 1132	-	-	-	-	79	19	4.15789	0.36906	0.180992	0.819008	mus
Olfr1133	10090.ENSMUSP00000097441	OL	0	0	0	0	NOG118475	olfactory receptor 1133	-	-	-	-	9	6	1.5	0.26017	0.212428	0.787572	mus
Olfr1134	10090.ENSMUSP00000097440	OL	0	0	0	0	NOG118475	olfactory receptor 1134	-	-	-	-	9	6	1.5	0.26017	0.212428	0.787572	mus
Olfr1135	10090.ENSMUSP00000097439	OL	0	0	0	0	NOG40895	olfactory receptor 1135	-	-	-	-	79	19	4.15789	0.36906	0.180992	0.819008	mus
Olfr1136	10090.ENSMUSP00000097438	OL	0	0	0	0	NOG40895	olfactory receptor 1136	-	-	-	-	79	19	4.15789	0.36906	0.180992	0.819008	mus
Olfr1137	10090.ENSMUSP00000097437	OL	0	0	0	0	NOG40895	olfactory receptor 1137	-	-	-	-	79	19	4.15789	0.36906	0.180992	0.819008	mus
Olfr1138	10090.ENSMUSP00000097435	OL	0	0	0	0	NOG40895	olfactory receptor 1138	-	-	-	-	79	19	4.15789	0.36906	0.180992	0.819008	mus
Olfr114	10090.ENSMUSP00000076181	OL	0	0	0	0	NOG132856	olfactory receptor 114	-	-	-	-	429	22	19.5	0.30323	0.0686681	0.931332	mus
Olfr1140	10090.ENSMUSP00000088212	OL	0	0	0	0	NOG40895	olfactory receptor 1140	-	-	-	-	79	19	4.15789	0.36906	0.180992	0.819008	mus
Olfr1141	10090.ENSMUSP00000097433	OL	0	0	0	0	NOG40895	olfactory receptor 1141	-	-	-	-	79	19	4.15789	0.36906	0.180992	0.819008	mus
Olfr1143	10090.ENSMUSP00000088210	OL	0	0	0	0	NOG40895	olfactory receptor 1143	-	-	-	-	79	19	4.15789	0.36906	0.180992	0.819008	mus
Olfr1145	10090.ENSMUSP00000088209	OL	0	0	0	0	NOG74490	olfactory receptor 1145	-	-	-	-	78	19	4.10526	0.40882	0.201772	0.798228	mus
Olfr1148	10090.ENSMUSP00000076778	OL	0	0	0	0	NOG74490	olfactory receptor 1148	-	-	-	-	78	19	4.10526	0.40882	0.201772	0.798228	mus
Olfr1151	10090.ENSMUSP00000055394	OL	270	1	2711963	0.9938	NOG40895	olfactory receptor 1151	-	-	-	-	79	19	4.15789	0.36906	0.180992	0.819008	mus
Olfr1152	10090.ENSMUSP00000054645	OL	0	0	0	0	NOG40895	olfactory receptor 1152	-	-	-	-	79	19	4.15789	0.36906	0.180992	0.819008	mus
Olfr1153	10090.ENSMUSP00000057839	OL	0	0	0	0	NOG40895	olfactory receptor 1153	-	-	-	-	79	19	4.15789	0.36906	0.180992	0.819008	mus
Olfr1154	10090.ENSMUSP00000097432	OL	0	0	0	0	NOG77329	olfactory receptor 1154	-	-	-	-	12	6	2	0.23886	0.1689	0.8311	mus
Olfr1155	10090.ENSMUSP00000097431	OL	270	1	2711963	0.9938	NOG145393	olfactory receptor 1155	-	-	-	-	2	2	1	0.10754	0.10754	0.89246	mus
Olfr1156	10090.ENSMUSP00000097430	OL	270	1	2711963	0.9938	NOG39978	olfactory receptor 1156	-	-	-	-	37	18	2.05556	0.43155	0.301	0.699	mus
Olfr1157	10090.ENSMUSP00000097429	OL	270	1	2711963	0.9938	NOG39978	olfactory receptor 1157	-	-	-	-	37	18	2.05556	0.43155	0.301	0.699	mus
Olfr1158	10090.ENSMUSP00000074000	OL	0	0	0	0	NOG77329	olfactory receptor 1158	-	-	-	-	12	6	2	0.23886	0.1689	0.8311	mus
Olfr116	10090.ENSMUSP00000072115	OL	0	0	0	0	NOG132856	olfactory receptor 116	-	-	-	-	429	22	19.5	0.30323	0.0686681	0.931332	mus
Olfr1160	10090.ENSMUSP00000097427	OL	0	0	0	0	NOG77329	olfactory receptor 1160	-	-	-	-	12	6	2	0.23886	0.1689	0.8311	mus
Olfr1161	10090.ENSMUSP00000060977	OL	0	0	0	0	NOG133219	olfactory receptor 1161	-	-	-	-	33	13	2.53846	0.27585	0.173136	0.826864	mus
Olfr1162	10090.ENSMUSP00000097425	OL	270	1	2711963	0.9938	NOG145188	olfactory receptor 1162	-	-	-	-	16	13	1.23077	0.38982	0.351379	0.648621	mus
Olfr1163	10090.ENSMUSP00000097423	OL	270	1	2711963	0.9938	NOG145188	olfactory receptor 1163	-	-	-	-	16	13	1.23077	0.38982	0.351379	0.648621	mus
Olfr1164	10090.ENSMUSP00000097422	OL	0	0	0	0	NOG39566	olfactory receptor 1164	-	-	-	-	39	13	3	0.35118	0.202754	0.797246	mus
Olfr1166	10090.ENSMUSP00000097421	OL	0	0	0	0	NOG39566	olfactory receptor 1166	-	-	-	-	39	13	3	0.35118	0.202754	0.797246	mus
Olfr1167	10090.ENSMUSP00000097420	OL	0	0	0	0	NOG39566	olfactory receptor 1167	-	-	-	-	39	13	3	0.35118	0.202754	0.797246	mus
Olfr1168	10090.ENSMUSP00000078549	OL	0	0	0	0	NOG39566	olfactory receptor 1168	-	-	-	-	39	13	3	0.35118	0.202754	0.797246	mus
Olfr117	10090.ENSMUSP00000073320	OL	0	0	0	0	NOG72461	olfactory receptor 117	-	-	-	-	15	5	3	0.24618	0.142132	0.857868	mus
Olfr1170	10090.ENSMUSP00000097419	OL	0	0	0	0	NOG39566	olfactory receptor 1170	-	-	-	-	39	13	3	0.35118	0.202754	0.797246	mus
Olfr1173	10090.ENSMUSP00000097418	OL	0	0	0	0	NOG39566	olfactory receptor 1173	-	-	-	-	39	13	3	0.35118	0.202754	0.797246	mus
Olfr1176	10090.ENSMUSP00000053353	OL	0	0	0	0	NOG39566	olfactory receptor 1176	-	-	-	-	39	13	3	0.35118	0.202754	0.797246	mus
Olfr1178	10090.ENSMUSP00000075066	OL	0	0	0	0	NOG131464	olfactory receptor 1178	-	-	-	-	51	19	2.68421	0.41627	0.254078	0.745922	mus
Olfr1179	10090.ENSMUSP00000097413	OL	0	0	0	0	NOG131464	olfactory receptor 1179	-	-	-	-	51	19	2.68421	0.41627	0.254078	0.745922	mus
Olfr1420	10090.ENSMUSP00000072563	OL	270	1	2711963	0.9938	NOG47552	olfactory receptor 1420	-	-	-	-	13	13	1	0.39793	0.39793	0.60207	mus
Olfr1180	10090.ENSMUSP00000097412	OL	270	1	2711963	0.9938	NOG131464	olfactory receptor 1180	-	-	-	-	51	19	2.68421	0.41627	0.254078	0.745922	mus
Olfr1181	10090.ENSMUSP00000097411	OL	0	0	0	0	NOG79946	olfactory receptor 1181	-	-	-	-	25	7	3.57143	0.27836	0.147294	0.852706	mus
Olfr1183	10090.ENSMUSP00000099678	OL	0	0	0	0	NOG148280	olfactory receptor 1183	-	-	-	-	18	8	2.25	0.27871	0.185807	0.814193	mus
Olfr1184	10090.ENSMUSP00000058679	OL	0	0	0	0	NOG79946	olfactory receptor 1184	-	-	-	-	25	7	3.57143	0.27836	0.147294	0.852706	mus
Olfr1186	10090.ENSMUSP00000074542	OL	0	0	0	0	NOG42331	olfactory receptor 1186	-	-	-	-	87	21	4.14286	0.4023	0.197651	0.802349	mus
Olfr1188	10090.ENSMUSP00000088202	OL	0	0	0	0	NOG123243	olfactory receptor 1188	-	-	-	-	13	9	1.44444	0.32551	0.270841	0.729159	mus
Olfr1189	10090.ENSMUSP00000088201	OL	270	1	2711963	0.9938	NOG136221	olfactory receptor 1189	-	-	-	-	23	11	2.09091	0.34847	0.240989	0.759011	mus
Olfr119	10090.ENSMUSP00000092919	OL	0	0	0	0	NOG150600	olfactory receptor 119	-	-	-	-	22	9	2.44444	0.28444	0.181929	0.818071	mus
Olfr1193	10090.ENSMUSP00000080399	OL	270	1	2711963	0.9938	NOG47746	olfactory receptor 1193	-	-	-	-	73	24	3.04167	0.46316	0.265568	0.734432	mus
Olfr1195	10090.ENSMUSP00000097406	OL	0	0	0	0	NOG42331	olfactory receptor 1195	-	-	-	-	87	21	4.14286	0.4023	0.197651	0.802349	mus
Olfr1196	10090.ENSMUSP00000097405	OL	0	0	0	0	NOG84905	olfactory receptor 1196	-	-	-	-	21	7	3	0.25977	0.149978	0.850022	mus
Olfr1197	10090.ENSMUSP00000097403	OL	0	0	0	0	NOG84905	olfactory receptor 1197	-	-	-	-	21	7	3	0.25977	0.149978	0.850022	mus
Olfr1198	10090.ENSMUSP00000097402	OL	0	0	0	0	NOG73827	olfactory receptor 1198	-	-	-	-	15	10	1.5	0.34303	0.280083	0.719917	mus
Olfr19	10090.ENSMUSP00000053393	OL	270	1	2711963	0.9938	NOG147368	olfactory receptor 19; Odorant receptor (Potential)	-	-	-	-	41	13	3.15385	0.36135	0.203473	0.796527	mus
Olfr12	10090.ENSMUSP00000080027	OL	0	0	0	0	NOG39077	olfactory receptor 12; Odorant receptor (Potential)	-	-	-	-	58	7	8.28571	0.25224	0.0876292	0.912371	mus
Olfr120	10090.ENSMUSP00000094931	OL	0	0	0	0	NOG150600	olfactory receptor 120	-	-	-	-	22	9	2.44444	0.28444	0.181929	0.818071	mus
Olfr1200	10090.ENSMUSP00000097399	OL	0	0	0	0	NOG84905	olfactory receptor 1200	-	-	-	-	21	7	3	0.25977	0.149978	0.850022	mus
Olfr1201	10090.ENSMUSP00000073163	OL	0	0	0	0	NOG42331	olfactory receptor 1201	-	-	-	-	87	21	4.14286	0.4023	0.197651	0.802349	mus
Olfr1202	10090.ENSMUSP00000071935	OL	0	0	0	0	NOG43086	olfactory receptor 1202	-	-	-	-	42	14	3	0.3856	0.222626	0.777374	mus
Olfr1204	10090.ENSMUSP00000077701	OL	0	0	0	0	NOG43086	olfactory receptor 1204	-	-	-	-	42	14	3	0.3856	0.222626	0.777374	mus
Olfr527	10090.ENSMUSP00000072405	OL	0	0	0	0	NOG83434	olfactory receptor 527	-	-	-	-	23	13	1.76923	0.373	0.280425	0.719575	mus
Olfr533	10090.ENSMUSP00000071667	OL	0	0	0	0	NOG45616	olfactory receptor 533	-	-	-	-	52	16	3.25	0.3444	0.191039	0.808961	mus
Olfr1208	10090.ENSMUSP00000097398	OL	0	0	0	0	NOG73827	olfactory receptor 1208	-	-	-	-	15	10	1.5	0.34303	0.280083	0.719917	mus
Olfr1209	10090.ENSMUSP00000097397	OL	270	1	2711963	0.9938	NOG42331	olfactory receptor 1209	-	-	-	-	87	21	4.14286	0.4023	0.197651	0.802349	mus
Olfr121	10090.ENSMUSP00000084377	OL	0	0	0	0	NOG150600	olfactory receptor 121	-	-	-	-	22	9	2.44444	0.28444	0.181929	0.818071	mus
Olfr1211	10090.ENSMUSP00000097396	OL	270	1	2711963	0.9938	NOG129537	olfactory receptor 1211	-	-	-	-	27	11	2.45455	0.31909	0.20367	0.79633	mus
Olfr1212	10090.ENSMUSP00000052837	OL	0	0	0	0	-	-	-	-	-	-	-	-	-	-	-	NA	mus
Olfr153	10090.ENSMUSP00000076681	OL	0	0	0	0	NOG40895	olfactory receptor 153	-	-	-	-	79	19	4.15789	0.36906	0.180992	0.819008	mus
Olfr1214	10090.ENSMUSP00000097392	OL	0	0	0	0	NOG129537	olfactory receptor 1214	-	-	-	-	27	11	2.45455	0.31909	0.20367	0.79633	mus
Olfr1215	10090.ENSMUSP00000097390	OL	0	0	0	0	NOG129537	olfactory receptor 1215	-	-	-	-	27	11	2.45455	0.31909	0.20367	0.79633	mus
Olfr1216	10090.ENSMUSP00000097388	OL	0	0	0	0	-	-	-	-	-	-	-	-	-	-	-	NA	mus
Olfr1217	10090.ENSMUSP00000097387	OL	0	0	0	0	-	-	-	-	-	-	-	-	-	-	-	NA	mus
Olfr1218	10090.ENSMUSP00000097386	OL	0	0	0	0	NOG129537	olfactory receptor 1218	-	-	-	-	27	11	2.45455	0.31909	0.20367	0.79633	mus
Olfr1219	10090.ENSMUSP00000097385	OL	0	0	0	0	-	-	-	-	-	-	-	-	-	-	-	NA	mus
Olfr1480	10090.ENSMUSP00000072076	OL	0	0	0	0	NOG45899	olfactory receptor 1480	-	-	-	-	104	20	5.2	0.41424	0.181656	0.818344	mus
Olfr1220	10090.ENSMUSP00000097384	OL	0	0	0	0	-	-	-	-	-	-	-	-	-	-	-	NA	mus
Olfr1221	10090.ENSMUSP00000097383	OL	0	0	0	0	-	-	-	-	-	-	-	-	-	-	-	NA	mus
Olfr1222	10090.ENSMUSP00000097382	OL	0	0	0	0	-	-	-	-	-	-	-	-	-	-	-	NA	mus
Olfr1223	10090.ENSMUSP00000097381	OL	0	0	0	0	NOG129537	olfactory receptor 1223	-	-	-	-	27	11	2.45455	0.31909	0.20367	0.79633	mus
Olfr1225	10090.ENSMUSP00000097379	OL	0	0	0	0	-	-	-	-	-	-	-	-	-	-	-	NA	mus
Olfr1226	10090.ENSMUSP00000097378	OL	0	0	0	0	-	-	-	-	-	-	-	-	-	-	-	NA	mus
Olfr1228	10090.ENSMUSP00000097377	OL	0	0	0	0	NOG129537	olfactory receptor 1228	-	-	-	-	27	11	2.45455	0.31909	0.20367	0.79633	mus
Olfr1229	10090.ENSMUSP00000097376	OL	270	1	2711963	0.9938	NOG148213	olfactory receptor 1229	-	-	-	-	4	3	1.33333	0.1613	0.13969	0.86031	mus
Olfr123	10090.ENSMUSP00000058678	OL	0	0	0	0	NOG72461	olfactory receptor 123	-	-	-	-	15	5	3	0.24618	0.142132	0.857868	mus
Olfr1230	10090.ENSMUSP00000097375	OL	270	1	2711963	0.9938	NOG136221	olfactory receptor 1230	-	-	-	-	23	11	2.09091	0.34847	0.240989	0.759011	mus
Olfr1231	10090.ENSMUSP00000097374	OL	0	0	0	0	NOG83405	olfactory receptor 1231	-	-	-	-	14	7	2	0.22508	0.159156	0.840844	mus
Olfr1232	10090.ENSMUSP00000097373	OL	0	0	0	0	NOG148213	olfactory receptor 1232	-	-	-	-	4	3	1.33333	0.1613	0.13969	0.86031	mus
Olfr1233	10090.ENSMUSP00000097372	OL	0	0	0	0	NOG123243	olfactory receptor 1233	-	-	-	-	13	9	1.44444	0.32551	0.270841	0.729159	mus
Olfr1234	10090.ENSMUSP00000097371	OL	270	1	2711963	0.9938	NOG145939	olfactory receptor 1234	-	-	-	-	57	20	2.85	0.42719	0.253046	0.746954	mus
Olfr1238	10090.ENSMUSP00000097369	OL	270	1	2711963	0.9938	NOG145939	olfactory receptor 1238	-	-	-	-	57	20	2.85	0.42719	0.253046	0.746954	mus
Olfr1239	10090.ENSMUSP00000097368	OL	0	0	0	0	NOG145939	olfactory receptor 1239	-	-	-	-	57	20	2.85	0.42719	0.253046	0.746954	mus
Olfr124	10090.ENSMUSP00000050544	OL	0	0	0	0	NOG135349	olfactory receptor 124	-	-	-	-	8	8	1	0.32261	0.32261	0.67739	mus
Olfr1240	10090.ENSMUSP00000097367	OL	270	1	2711963	0.9938	NOG145939	olfactory receptor 1240	-	-	-	-	57	20	2.85	0.42719	0.253046	0.746954	mus
Olfr1241	10090.ENSMUSP00000097366	OL	0	0	0	0	-	-	-	-	-	-	-	-	-	-	-	NA	mus
Olfr1242	10090.ENSMUSP00000097365	OL	0	0	0	0	-	-	-	-	-	-	-	-	-	-	-	NA	mus
Olfr1243	10090.ENSMUSP00000097363	OL	0	0	0	0	-	-	-	-	-	-	-	-	-	-	-	NA	mus
Olfr1245	10090.ENSMUSP00000097361	OL	0	0	0	0	-	-	-	-	-	-	-	-	-	-	-	NA	mus
Olfr1246	10090.ENSMUSP00000097360	OL	0	0	0	0	-	-	-	-	-	-	-	-	-	-	-	NA	mus
Olfr1247	10090.ENSMUSP00000097359	OL	270	1	2711963	0.9938	-	-	-	-	-	-	-	-	-	-	-	NA	mus
Olfr1248	10090.ENSMUSP00000097358	OL	0	0	0	0	-	-	-	-	-	-	-	-	-	-	-	NA	mus
Olfr1249	10090.ENSMUSP00000097357	OL	0	0	0	0	-	-	-	-	-	-	-	-	-	-	-	NA	mus
Olfr125	10090.ENSMUSP00000055221	OL	270	1	2711963	0.9938	NOG132856	olfactory receptor 125	-	-	-	-	429	22	19.5	0.30323	0.0686681	0.931332	mus
Olfr1250	10090.ENSMUSP00000097356	OL	0	0	0	0	-	-	-	-	-	-	-	-	-	-	-	NA	mus
Olfr1251	10090.ENSMUSP00000097355	OL	0	0	0	0	-	-	-	-	-	-	-	-	-	-	-	NA	mus
Olfr1252	10090.ENSMUSP00000097354	OL	0	0	0	0	-	-	-	-	-	-	-	-	-	-	-	NA	mus
Olfr1254	10090.ENSMUSP00000097352	OL	0	0	0	0	NOG148434	olfactory receptor 1254	-	-	-	-	3	3	1	0.17044	0.17044	0.82956	mus
Olfr1255	10090.ENSMUSP00000060602	OL	0	0	0	0	NOG148489	olfactory receptor 1255	-	-	-	-	26	16	1.625	0.41135	0.322689	0.677311	mus
Olfr1256	10090.ENSMUSP00000097351	OL	270	1	2711963	0.9938	NOG117994	olfactory receptor 1256	-	-	-	-	38	15	2.53333	0.37077	0.232948	0.767052	mus
Olfr1257	10090.ENSMUSP00000056439	OL	0	0	0	0	NOG43086	olfactory receptor 1257	-	-	-	-	42	14	3	0.3856	0.222626	0.777374	mus
Olfr1258	10090.ENSMUSP00000099669	OL	0	0	0	0	NOG43086	olfactory receptor 1258	-	-	-	-	42	14	3	0.3856	0.222626	0.777374	mus
Olfr1259	10090.ENSMUSP00000088194	OL	270	1	2711963	0.9938	NOG148489	olfactory receptor 1259	-	-	-	-	26	16	1.625	0.41135	0.322689	0.677311	mus
Olfr126	10090.ENSMUSP00000076203	OL	0	0	0	0	NOG132856	olfactory receptor 126	-	-	-	-	429	22	19.5	0.30323	0.0686681	0.931332	mus
Olfr1260	10090.ENSMUSP00000053523	OL	270	1	2711963	0.9938	NOG42721	olfactory receptor 1260	-	-	-	-	58	16	3.625	0.22273	0.116984	0.883016	mus
Olfr1261	10090.ENSMUSP00000076959	OL	0	0	0	0	NOG42026	olfactory receptor 1261	-	-	-	-	30	14	2.14286	0.369	0.252075	0.747925	mus
Olfr1262	10090.ENSMUSP00000052387	OL	0	0	0	0	NOG42026	olfactory receptor 1262	-	-	-	-	30	14	2.14286	0.369	0.252075	0.747925	mus
Olfr1263	10090.ENSMUSP00000080494	OL	0	0	0	0	NOG42026	olfactory receptor 1263	-	-	-	-	30	14	2.14286	0.369	0.252075	0.747925	mus
Olfr1264	10090.ENSMUSP00000097347	OL	270	1	2711963	0.9938	NOG114884	olfactory receptor 1264	-	-	-	-	20	15	1.33333	0.411	0.355937	0.644063	mus
Olfr1265	10090.ENSMUSP00000079190	OL	270	1	2711963	0.9938	NOG43600	olfactory receptor 1265	-	-	-	-	27	15	1.8	0.39875	0.297211	0.702789	mus
Olfr1269	10090.ENSMUSP00000097345	OL	270	1	2711963	0.9938	NOG43600	olfactory receptor 1269	-	-	-	-	27	15	1.8	0.39875	0.297211	0.702789	mus
Olfr127	10090.ENSMUSP00000075669	OL	0	0	0	0	NOG132856	olfactory receptor 127	-	-	-	-	429	22	19.5	0.30323	0.0686681	0.931332	mus
Olfr1270	10090.ENSMUSP00000097343	OL	270	1	2711963	0.9938	NOG47746	olfactory receptor 1270	-	-	-	-	73	24	3.04167	0.46316	0.265568	0.734432	mus
Olfr1271	10090.ENSMUSP00000097340	OL	0	0	0	0	NOG47746	olfactory receptor 1271	-	-	-	-	73	24	3.04167	0.46316	0.265568	0.734432	mus
Olfr1272	10090.ENSMUSP00000097339	OL	0	0	0	0	NOG47746	olfactory receptor 1272	-	-	-	-	73	24	3.04167	0.46316	0.265568	0.734432	mus
Olfr1275	10090.ENSMUSP00000097215	OL	0	0	0	0	NOG70190	olfactory receptor 1275	-	-	-	-	26	13	2	0.38029	0.268906	0.731094	mus
Olfr1276	10090.ENSMUSP00000073046	OL	0	0	0	0	NOG70190	olfactory receptor 1276	-	-	-	-	26	13	2	0.38029	0.268906	0.731094	mus
Olfr1277	10090.ENSMUSP00000097214	OL	0	0	0	0	NOG71345	olfactory receptor 1277	-	-	-	-	45	15	3	0.36933	0.213233	0.786767	mus
Olfr1278	10090.ENSMUSP00000087802	OL	0	0	0	0	NOG70190	olfactory receptor 1278	-	-	-	-	26	13	2	0.38029	0.268906	0.731094	mus
Olfr1279	10090.ENSMUSP00000087801	OL	0	0	0	0	NOG146707	olfactory receptor 1279	-	-	-	-	16	11	1.45455	0.35786	0.296721	0.703279	mus
Olfr128	10090.ENSMUSP00000079121	OL	0	0	0	0	NOG132856	olfactory receptor 128	-	-	-	-	429	22	19.5	0.30323	0.0686681	0.931332	mus
Olfr1280	10090.ENSMUSP00000087800	OL	0	0	0	0	NOG71345	olfactory receptor 1280	-	-	-	-	45	15	3	0.36933	0.213233	0.786767	mus
Olfr1281	10090.ENSMUSP00000087798	OL	0	0	0	0	NOG71345	olfactory receptor 1281	-	-	-	-	45	15	3	0.36933	0.213233	0.786767	mus
Olfr1282	10090.ENSMUSP00000097213	OL	0	0	0	0	NOG71345	olfactory receptor 1282	-	-	-	-	45	15	3	0.36933	0.213233	0.786767	mus
Olfr257	10090.ENSMUSP00000078672	OL	0	0	0	0	NOG77860	olfactory receptor 285	-	-	-	-	51	17	3	0.38451	0.221997	0.778003	mus
Olfr1284	10090.ENSMUSP00000052153	OL	0	0	0	0	NOG146707	olfactory receptor 1284	-	-	-	-	16	11	1.45455	0.35786	0.296721	0.703279	mus
Olfr1285	10090.ENSMUSP00000073594	OL	0	0	0	0	NOG71345	olfactory receptor 1285	-	-	-	-	45	15	3	0.36933	0.213233	0.786767	mus
Olfr1286	10090.ENSMUSP00000097212	OL	0	0	0	0	NOG71345	olfactory receptor 1286	-	-	-	-	45	15	3	0.36933	0.213233	0.786767	mus
Olfr1287	10090.ENSMUSP00000074850	OL	0	0	0	0	NOG71345	olfactory receptor 1287	-	-	-	-	45	15	3	0.36933	0.213233	0.786767	mus
Olfr1288	10090.ENSMUSP00000059005	OL	0	0	0	0	NOG76229	olfactory receptor 1288	-	-	-	-	10	9	1.11111	0.33572	0.318492	0.681508	mus
Olfr1289	10090.ENSMUSP00000077188	OL	270	1	2711963	0.9938	NOG146672	olfactory receptor 1289	-	-	-	-	18	11	1.63636	0.35125	0.274585	0.725415	mus
Olfr1450	10090.ENSMUSP00000080666	OL	0	0	0	0	NOG78952	olfactory receptor 1450	-	-	-	-	11	7	1.57143	0.28643	0.228492	0.771508	mus
Olfr1290	10090.ENSMUSP00000097211	OL	0	0	0	0	NOG71345	olfactory receptor 1290	-	-	-	-	45	15	3	0.36933	0.213233	0.786767	mus
Olfr1294	10090.ENSMUSP00000097209	OL	0	0	0	0	-	-	-	-	-	-	-	-	-	-	-	NA	mus
Olfr1295	10090.ENSMUSP00000097208	OL	0	0	0	0	-	-	-	-	-	-	-	-	-	-	-	NA	mus
Olfr1297	10090.ENSMUSP00000097207	OL	0	0	0	0	-	-	-	-	-	-	-	-	-	-	-	NA	mus
Olfr1298	10090.ENSMUSP00000099610	OL	0	0	0	0	NOG71345	olfactory receptor 1298	-	-	-	-	45	15	3	0.36933	0.213233	0.786767	mus
Olfr314	10090.ENSMUSP00000075729	OL	270	1	2711963	0.9938	NOG47682	olfactory receptor 314	-	-	-	-	50	14	3.57143	0.35016	0.185287	0.814713	mus
Olfr13	10090.ENSMUSP00000053813	OL	270	1	2711963	0.9938	NOG120592	olfactory receptor 13; Odorant receptor (Potential)	-	-	-	-	14	10	1.4	0.34798	0.294097	0.705903	mus
Olfr130	10090.ENSMUSP00000084369	OL	0	0	0	0	NOG72461	olfactory receptor 130	-	-	-	-	15	5	3	0.24618	0.142132	0.857868	mus
Olfr1301	10090.ENSMUSP00000078993	OL	0	0	0	0	NOG41945	olfactory receptor 1301	-	-	-	-	28	16	1.75	0.39556	0.299015	0.700985	mus
Olfr1302	10090.ENSMUSP00000061674	OL	0	0	0	0	NOG146119	olfactory receptor 1302	-	-	-	-	3	3	1	0.17044	0.17044	0.82956	mus
Olfr1303	10090.ENSMUSP00000097204	OL	270	1	2711963	0.9938	NOG148479	olfactory receptor 1303	-	-	-	-	20	13	1.53846	0.37468	0.302077	0.697923	mus
Olfr1305	10090.ENSMUSP00000097203	OL	0	0	0	0	NOG145174	olfactory receptor 1305	-	-	-	-	4	4	1	0.21507	0.21507	0.78493	mus
Olfr1306	10090.ENSMUSP00000097202	OL	0	0	0	0	NOG116959	olfactory receptor 1306	-	-	-	-	47	17	2.76471	0.39146	0.23543	0.76457	mus
Olfr1307	10090.ENSMUSP00000097201	OL	0	0	0	0	NOG116959	olfactory receptor 1307	-	-	-	-	47	17	2.76471	0.39146	0.23543	0.76457	mus
Olfr1308	10090.ENSMUSP00000097200	OL	0	0	0	0	NOG116959	olfactory receptor 1308	-	-	-	-	47	17	2.76471	0.39146	0.23543	0.76457	mus
Olfr1309	10090.ENSMUSP00000097199	OL	270	1	2711963	0.9938	NOG47042	olfactory receptor 1309	-	-	-	-	26	17	1.52941	0.42477	0.343472	0.656528	mus
Olfr131	10090.ENSMUSP00000061861	OL	0	0	0	0	NOG136927	olfactory receptor 131	-	-	-	-	7	6	1.16667	0.27117	0.251054	0.748946	mus
Olfr1310	10090.ENSMUSP00000097197	OL	270	1	2711963	0.9938	NOG45865	olfactory receptor 1310	-	-	-	-	10	10	1	0.35723	0.35723	0.64277	mus
Olfr1311	10090.ENSMUSP00000097196	OL	0	0	0	0	NOG47042	olfactory receptor 1311	-	-	-	-	26	17	1.52941	0.42477	0.343472	0.656528	mus
Olfr1312	10090.ENSMUSP00000097195	OL	0	0	0	0	NOG116959	olfactory receptor 1312	-	-	-	-	47	17	2.76471	0.39146	0.23543	0.76457	mus
Olfr1313	10090.ENSMUSP00000097194	OL	0	0	0	0	NOG116959	olfactory receptor 1313	-	-	-	-	47	17	2.76471	0.39146	0.23543	0.76457	mus
Olfr1314	10090.ENSMUSP00000097193	OL	0	0	0	0	NOG116959	olfactory receptor 1314	-	-	-	-	47	17	2.76471	0.39146	0.23543	0.76457	mus
Olfr1316	10090.ENSMUSP00000097191	OL	0	0	0	0	NOG116959	olfactory receptor 1316	-	-	-	-	47	17	2.76471	0.39146	0.23543	0.76457	mus
Olfr1317	10090.ENSMUSP00000058587	OL	0	0	0	0	NOG147013	olfactory receptor 1317	-	-	-	-	23	12	1.91667	0.35383	0.255577	0.744423	mus
Olfr1318	10090.ENSMUSP00000051938	OL	0	0	0	0	NOG147013	olfactory receptor 1318	-	-	-	-	23	12	1.91667	0.35383	0.255577	0.744423	mus
Olfr132	10090.ENSMUSP00000084368	OL	0	0	0	0	NOG115807	olfactory receptor 132	-	-	-	-	54	20	2.7	0.4376	0.266315	0.733685	mus
Olfr1320	10090.ENSMUSP00000094186	OL	0	0	0	0	NOG47967	olfactory receptor 1320	-	-	-	-	18	10	1.8	0.32675	0.243545	0.756455	mus
Olfr1321	10090.ENSMUSP00000086263	OL	0	0	0	0	NOG146972	olfactory receptor 1321	-	-	-	-	20	3	6.66667	0.06119	0.0236988	0.976301	mus
Olfr1322	10090.ENSMUSP00000065196	OL	0	0	0	0	-	-	-	-	-	-	-	-	-	-	-	NA	mus
Olfr1323	10090.ENSMUSP00000050768	OL	0	0	0	0	NOG74474	olfactory receptor 1323	-	-	-	-	7	7	1	0.30189	0.30189	0.69811	mus
Olfr1324	10090.ENSMUSP00000052365	OL	0	0	0	0	NOG149035	olfactory receptor 1324	-	-	-	-	3	3	1	0.17044	0.17044	0.82956	mus
Olfr1325	10090.ENSMUSP00000052441	OL	0	0	0	0	NOG69813	olfactory receptor 1325	-	-	-	-	23	12	1.91667	0.29918	0.216102	0.783898	mus
Olfr1328	10090.ENSMUSP00000080626	OL	0	0	0	0	NOG120213	olfactory receptor 1328	-	-	-	-	21	4	5.25	0.18557	0.0809894	0.919011	mus
Olfr1329	10090.ENSMUSP00000071870	OL	0	0	0	0	NOG120213	olfactory receptor 1329	-	-	-	-	21	4	5.25	0.18557	0.0809894	0.919011	mus
Olfr133	10090.ENSMUSP00000078209	OL	0	0	0	0	NOG147598	olfactory receptor 133	-	-	-	-	18	4	4.5	0.15172	0.0715215	0.928479	mus
Olfr1330	10090.ENSMUSP00000092425	OL	0	0	0	0	NOG120213	olfactory receptor 1330	-	-	-	-	21	4	5.25	0.18557	0.0809894	0.919011	mus
Olfr1331	10090.ENSMUSP00000092426	OL	0	0	0	0	NOG120213	olfactory receptor 1331	-	-	-	-	21	4	5.25	0.18557	0.0809894	0.919011	mus
Olfr1333	10090.ENSMUSP00000075398	OL	0	0	0	0	NOG120213	olfactory receptor 1333	-	-	-	-	21	4	5.25	0.18557	0.0809894	0.919011	mus
Olfr1336	10090.ENSMUSP00000056956	OL	0	0	0	0	NOG68719	olfactory receptor 1336	-	-	-	-	4	4	1	0.21507	0.21507	0.78493	mus
Olfr1337	10090.ENSMUSP00000076483	OL	0	0	0	0	NOG120213	olfactory receptor 1337	-	-	-	-	21	4	5.25	0.18557	0.0809894	0.919011	mus
Olfr1338	10090.ENSMUSP00000092427	OL	0	0	0	0	NOG120213	olfactory receptor 1338	-	-	-	-	21	4	5.25	0.18557	0.0809894	0.919011	mus
Olfr1339	10090.ENSMUSP00000092428	OL	0	0	0	0	NOG146150	olfactory receptor 1339	-	-	-	-	9	7	1.28571	0.28407	0.250527	0.749473	mus
Olfr134	10090.ENSMUSP00000074423	OL	0	0	0	0	NOG147598	olfactory receptor 134	-	-	-	-	18	4	4.5	0.15172	0.0715215	0.928479	mus
Olfr1340	10090.ENSMUSP00000092430	OL	0	0	0	0	NOG146150	olfactory receptor 1340	-	-	-	-	9	7	1.28571	0.28407	0.250527	0.749473	mus
Olfr1341	10090.ENSMUSP00000095522	OL	0	0	0	0	NOG82425	olfactory receptor 1341	-	-	-	-	9	8	1.125	0.31698	0.298852	0.701148	mus
Olfr1342	10090.ENSMUSP00000053925	OL	0	0	0	0	NOG148378	olfactory receptor 1342	-	-	-	-	6	6	1	0.27798	0.27798	0.72202	mus
Olfr1344	10090.ENSMUSP00000050428	OL	0	0	0	0	NOG113082	olfactory receptor 1344	-	-	-	-	3	3	1	0.17044	0.17044	0.82956	mus
Olfr1346	10090.ENSMUSP00000050553	OL	0	0	0	0	-	-	-	-	-	-	-	-	-	-	-	NA	mus
Olfr1347	10090.ENSMUSP00000046590	OL	0	0	0	0	NOG85237	olfactory receptor 1347	-	-	-	-	12	8	1.5	0.31382	0.256233	0.743767	mus
Olfr1348	10090.ENSMUSP00000083498	OL	0	0	0	0	NOG85237	olfactory receptor 1348	-	-	-	-	12	8	1.5	0.31382	0.256233	0.743767	mus
Olfr1349	10090.ENSMUSP00000056639	OL	270	1	2711963	0.9938	NOG78206	olfactory receptor 1349	-	-	-	-	6	5	1.2	0.24213	0.221033	0.778967	mus
Olfr135	10090.ENSMUSP00000075595	OL	0	0	0	0	NOG147598	olfactory receptor 135	-	-	-	-	18	4	4.5	0.15172	0.0715215	0.928479	mus
Olfr1350	10090.ENSMUSP00000069927	OL	0	0	0	0	NOG83140	olfactory receptor 1350	-	-	-	-	18	7	2.57143	0.26017	0.162244	0.837756	mus
Olfr1351	10090.ENSMUSP00000079555	OL	0	0	0	0	NOG150292	olfactory receptor 1351	-	-	-	-	111	21	5.28571	0.44183	0.192178	0.807822	mus
Olfr1352	10090.ENSMUSP00000054355	OL	0	0	0	0	NOG150292	olfactory receptor 1352	-	-	-	-	111	21	5.28571	0.44183	0.192178	0.807822	mus
Olfr1353	10090.ENSMUSP00000038992	OL	0	0	0	0	-	-	-	-	-	-	-	-	-	-	-	NA	mus
Olfr1354	10090.ENSMUSP00000093126	OL	0	0	0	0	NOG150292	olfactory receptor 1354	-	-	-	-	111	21	5.28571	0.44183	0.192178	0.807822	mus
Olfr1355	10090.ENSMUSP00000077517	OL	0	0	0	0	-	-	-	-	-	-	-	-	-	-	-	NA	mus
Olfr1356	10090.ENSMUSP00000054345	OL	0	0	0	0	NOG41548	olfactory receptor 1356	-	-	-	-	46	17	2.70588	0.38843	0.236134	0.763866	mus
Olfr1357	10090.ENSMUSP00000093127	OL	270	1	2711963	0.9938	NOG44361	olfactory receptor 1357	-	-	-	-	10	8	1.25	0.31421	0.281038	0.718962	mus
Olfr1358	10090.ENSMUSP00000093128	OL	270	1	2711963	0.9938	NOG130923	olfactory receptor 1358	-	-	-	-	4	3	1.33333	0.1613	0.13969	0.86031	mus
Olfr1359	10090.ENSMUSP00000074361	OL	270	1	2711963	0.9938	NOG39029	olfactory receptor 1359	-	-	-	-	52	18	2.88889	0.42061	0.247465	0.752535	mus
Olfr136	10090.ENSMUSP00000076443	OL	0	0	0	0	NOG147598	olfactory receptor 136	-	-	-	-	18	4	4.5	0.15172	0.0715215	0.928479	mus
Olfr1360	10090.ENSMUSP00000077010	OL	270	1	2711963	0.9938	NOG39029	olfactory receptor 1359	-	-	-	-	52	18	2.88889	0.42061	0.247465	0.752535	mus
Olfr1361	10090.ENSMUSP00000062356	OL	0	0	0	0	NOG41945	olfactory receptor 1361	-	-	-	-	28	16	1.75	0.39556	0.299015	0.700985	mus
Olfr1362	10090.ENSMUSP00000061660	OL	0	0	0	0	NOG41945	olfactory receptor 1362	-	-	-	-	28	16	1.75	0.39556	0.299015	0.700985	mus
Olfr1364	10090.ENSMUSP00000059544	OL	0	0	0	0	NOG67819	olfactory receptor 1364	-	-	-	-	28	16	1.75	0.41319	0.312342	0.687658	mus
Olfr1366	10090.ENSMUSP00000061102	OL	0	0	0	0	NOG46041	olfactory receptor 1366	-	-	-	-	13	10	1.3	0.33175	0.290964	0.709036	mus
Olfr1367	10090.ENSMUSP00000055870	OL	0	0	0	0	NOG124373	olfactory receptor 1367	-	-	-	-	97	20	4.85	0.3752	0.17037	0.82963	mus
Olfr1368	10090.ENSMUSP00000050942	OL	0	0	0	0	NOG84433	olfactory receptor 1368	-	-	-	-	6	5	1.2	0.24213	0.221033	0.778967	mus
Olfr137	10090.ENSMUSP00000051537	OL	270	1	2711963	0.9938	NOG146261	olfactory receptor 137	-	-	-	-	27	15	1.8	0.37941	0.282796	0.717204	mus
Olfr1370	10090.ENSMUSP00000054533	OL	0	0	0	0	NOG39029	olfactory receptor 1370	-	-	-	-	52	18	2.88889	0.42061	0.247465	0.752535	mus
Olfr1371	10090.ENSMUSP00000075241	OL	0	0	0	0	NOG39798	olfactory receptor 1371	-	-	-	-	58	16	3.625	0.3336	0.175215	0.824785	mus
Olfr1373	10090.ENSMUSP00000077384	OL	0	0	0	0	NOG39798	olfactory receptor 1373	-	-	-	-	58	16	3.625	0.3336	0.175215	0.824785	mus
Olfr1377	10090.ENSMUSP00000074672	OL	0	0	0	0	NOG147674	olfactory receptor 1377	-	-	-	-	15	10	1.5	0.34303	0.280083	0.719917	mus
Olfr1378	10090.ENSMUSP00000058119	OL	0	0	0	0	NOG150292	olfactory receptor 1378	-	-	-	-	111	21	5.28571	0.44183	0.192178	0.807822	mus
Olfr138	10090.ENSMUSP00000071767	OL	0	0	0	0	NOG147598	olfactory receptor 138	-	-	-	-	18	4	4.5	0.15172	0.0715215	0.928479	mus
Olfr1380	10090.ENSMUSP00000071373	OL	0	0	0	0	NOG39798	olfactory receptor 1380	-	-	-	-	58	16	3.625	0.3336	0.175215	0.824785	mus
Olfr1381	10090.ENSMUSP00000072493	OL	0	0	0	0	NOG39798	olfactory receptor 1381	-	-	-	-	58	16	3.625	0.3336	0.175215	0.824785	mus
Olfr1382	10090.ENSMUSP00000074130	OL	0	0	0	0	NOG39798	olfactory receptor 1382	-	-	-	-	58	16	3.625	0.3336	0.175215	0.824785	mus
Olfr1383	10090.ENSMUSP00000076407	OL	0	0	0	0	NOG39798	olfactory receptor 1383	-	-	-	-	58	16	3.625	0.3336	0.175215	0.824785	mus
Olfr1384	10090.ENSMUSP00000051954	OL	0	0	0	0	NOG39798	olfactory receptor 1384	-	-	-	-	58	16	3.625	0.3336	0.175215	0.824785	mus
Olfr1385	10090.ENSMUSP00000071710	OL	270	1	2711963	0.9938	NOG39798	olfactory receptor 1385	-	-	-	-	58	16	3.625	0.3336	0.175215	0.824785	mus
Olfr1386	10090.ENSMUSP00000071801	OL	270	1	2711963	0.9938	NOG39798	olfactory receptor 1386	-	-	-	-	58	16	3.625	0.3336	0.175215	0.824785	mus
Olfr1387	10090.ENSMUSP00000073494	OL	0	0	0	0	NOG39798	olfactory receptor 1387	-	-	-	-	58	16	3.625	0.3336	0.175215	0.824785	mus
Olfr1388	10090.ENSMUSP00000053834	OL	0	0	0	0	NOG39798	olfactory receptor 1388	-	-	-	-	58	16	3.625	0.3336	0.175215	0.824785	mus
Olfr1389	10090.ENSMUSP00000052151	OL	0	0	0	0	NOG39798	olfactory receptor 1389	-	-	-	-	58	16	3.625	0.3336	0.175215	0.824785	mus
Olfr139	10090.ENSMUSP00000049558	OL	0	0	0	0	NOG146065	Olfactory receptor 139 (Olfactory receptor 1) (Olfactory receptor 255- 2) (Odorant receptor [...]	-	-	-	-	3	3	1	0.17044	0.17044	0.82956	mus
Olfr1390	10090.ENSMUSP00000053611	OL	0	0	0	0	NOG39798	olfactory receptor 1390	-	-	-	-	58	16	3.625	0.3336	0.175215	0.824785	mus
Olfr1391	10090.ENSMUSP00000052092	OL	0	0	0	0	NOG39798	olfactory receptor 1391	-	-	-	-	58	16	3.625	0.3336	0.175215	0.824785	mus
Olfr1392	10090.ENSMUSP00000060333	OL	0	0	0	0	NOG39798	olfactory receptor 1392	-	-	-	-	58	16	3.625	0.3336	0.175215	0.824785	mus
Olfr1393	10090.ENSMUSP00000077962	OL	0	0	0	0	NOG39798	olfactory receptor 1393	-	-	-	-	58	16	3.625	0.3336	0.175215	0.824785	mus
Olfr1394	10090.ENSMUSP00000063062	OL	0	0	0	0	NOG42540	olfactory receptor 1394	-	-	-	-	47	15	3.13333	0.39917	0.225504	0.774496	mus
Olfr1395	10090.ENSMUSP00000050142	OL	0	0	0	0	NOG44407	olfactory receptor 1395	-	-	-	-	9	8	1.125	0.31698	0.298852	0.701148	mus
Olfr1396	10090.ENSMUSP00000056876	OL	270	1	2711963	0.9938	NOG39955	olfactory receptor 1396	-	-	-	-	19	15	1.26667	0.41153	0.365654	0.634346	mus
Olfr140	10090.ENSMUSP00000097346	OL	0	0	0	0	NOG114884	olfactory receptor 140; Odorant receptor (Potential)	-	-	-	-	20	15	1.33333	0.411	0.355937	0.644063	mus
Olfr1402	10090.ENSMUSP00000057416	OL	0	0	0	0	NOG147928	olfactory receptor 1402	-	-	-	-	50	17	2.94118	0.40283	0.234888	0.765112	mus
Olfr1404	10090.ENSMUSP00000050406	OL	0	0	0	0	NOG148711	olfactory receptor 1404	-	-	-	-	12	10	1.2	0.34967	0.319204	0.680796	mus
Olfr1406	10090.ENSMUSP00000072231	OL	0	0	0	0	NOG79167	olfactory receptor 1406	-	-	-	-	22	17	1.29412	0.43067	0.37858	0.62142	mus
Olfr1408	10090.ENSMUSP00000073345	OL	0	0	0	0	NOG79167	olfactory receptor 1408	-	-	-	-	22	17	1.29412	0.43067	0.37858	0.62142	mus
Olfr731	10090.ENSMUSP00000050705	OL	0	0	0	0	NOG145515	olfactory receptor 731	-	-	-	-	5	5	1	0.24969	0.24969	0.75031	mus
Olfr1410	10090.ENSMUSP00000078720	OL	0	0	0	0	NOG39077	olfactory receptor 1410	-	-	-	-	58	7	8.28571	0.25224	0.0876292	0.912371	mus
Olfr1411	10090.ENSMUSP00000073422	OL	0	0	0	0	NOG39077	olfactory receptor 1411	-	-	-	-	58	7	8.28571	0.25224	0.0876292	0.912371	mus
Olfr1412	10090.ENSMUSP00000060291	OL	0	0	0	0	NOG39077	olfactory receptor 1412	-	-	-	-	58	7	8.28571	0.25224	0.0876292	0.912371	mus
Olfr1413	10090.ENSMUSP00000074402	OL	0	0	0	0	NOG39077	olfactory receptor 1413	-	-	-	-	58	7	8.28571	0.25224	0.0876292	0.912371	mus
Olfr1414	10090.ENSMUSP00000054752	OL	270	1	2711963	0.9938	NOG47186	olfactory receptor 1414	-	-	-	-	20	11	1.81818	0.34911	0.258907	0.741093	mus
Olfr1415	10090.ENSMUSP00000084047	OL	0	0	0	0	NOG47186	olfactory receptor 1415	-	-	-	-	20	11	1.81818	0.34911	0.258907	0.741093	mus
Olfr1416	10090.ENSMUSP00000084048	OL	0	0	0	0	NOG47186	olfactory receptor 1416	-	-	-	-	20	11	1.81818	0.34911	0.258907	0.741093	mus
Olfr1417	10090.ENSMUSP00000062542	OL	0	0	0	0	NOG83208	olfactory receptor 1417	-	-	-	-	10	6	1.66667	0.26308	0.203781	0.796219	mus
Olfr1418	10090.ENSMUSP00000078800	OL	0	0	0	0	NOG83208	olfactory receptor 1418	-	-	-	-	10	6	1.66667	0.26308	0.203781	0.796219	mus
Olfr1419	10090.ENSMUSP00000085163	OL	0	0	0	0	NOG73047	olfactory receptor 1419	-	-	-	-	2	2	1	0.10754	0.10754	0.89246	mus
Olfr142	10090.ENSMUSP00000097341	OL	0	0	0	0	NOG47746	olfactory receptor 142; Odorant receptor (Potential)	-	-	-	-	73	24	3.04167	0.46316	0.265568	0.734432	mus
Olfr1420	10090.ENSMUSP00000072563	OL	270	1	2711963	0.9938	NOG47552	olfactory receptor 1420	-	-	-	-	13	13	1	0.39793	0.39793	0.60207	mus
Olfr1423	10090.ENSMUSP00000085134	OL	270	1	2711963	0.9938	NOG47369	olfactory receptor 1423	-	-	-	-	67	19	3.52632	0.44326	0.236047	0.763953	mus
Olfr1424	10090.ENSMUSP00000085132	OL	0	0	0	0	NOG47369	olfactory receptor 1424	-	-	-	-	67	19	3.52632	0.44326	0.236047	0.763953	mus
Olfr1425	10090.ENSMUSP00000085130	OL	270	1	2711963	0.9938	NOG47369	olfactory receptor 1425	-	-	-	-	67	19	3.52632	0.44326	0.236047	0.763953	mus
Olfr1426	10090.ENSMUSP00000060659	OL	270	1	2711963	0.9938	NOG47369	olfactory receptor 1426	-	-	-	-	67	19	3.52632	0.44326	0.236047	0.763953	mus
Olfr1427	10090.ENSMUSP00000085127	OL	0	0	0	0	NOG47369	olfactory receptor 1427	-	-	-	-	67	19	3.52632	0.44326	0.236047	0.763953	mus
Olfr1428	10090.ENSMUSP00000085126	OL	270	1	2711963	0.9938	NOG148673	olfactory receptor 1428	-	-	-	-	14	13	1.07692	0.39407	0.379736	0.620264	mus
Olfr143	10090.ENSMUSP00000091388	OL	0	0	0	0	NOG68623	olfactory receptor 143; Odorant receptor (Potential)	-	-	-	-	15	5	3	0.18693	0.107924	0.892076	mus
Olfr1431	10090.ENSMUSP00000072158	OL	0	0	0	0	NOG127675	olfactory receptor 1431	-	-	-	-	56	18	3.11111	0.41493	0.235243	0.764757	mus
Olfr1432	10090.ENSMUSP00000085121	OL	0	0	0	0	NOG75829	olfactory receptor 1432	-	-	-	-	74	12	6.16667	0.2898	0.116701	0.883299	mus
Olfr1433	10090.ENSMUSP00000085115	OL	270	1	2711963	0.9938	NOG127675	olfactory receptor 1434	-	-	-	-	56	18	3.11111	0.41493	0.235243	0.764757	mus
Olfr811	10090.ENSMUSP00000075768	OL	0	0	0	0	NOG147395	olfactory receptor 811	-	-	-	-	4	4	1	0.21507	0.21507	0.78493	mus
Olfr1436	10090.ENSMUSP00000085113	OL	0	0	0	0	NOG127675	olfactory receptor 1436	-	-	-	-	56	18	3.11111	0.41493	0.235243	0.764757	mus
Olfr1437	10090.ENSMUSP00000056003	OL	0	0	0	0	NOG127675	olfactory receptor 1437	-	-	-	-	56	18	3.11111	0.41493	0.235243	0.764757	mus
Olfr1440	10090.ENSMUSP00000054798	OL	0	0	0	0	NOG127675	olfactory receptor 1440	-	-	-	-	56	18	3.11111	0.41493	0.235243	0.764757	mus
Olfr1441	10090.ENSMUSP00000061963	OL	0	0	0	0	NOG130355	olfactory receptor 1441	-	-	-	-	6	6	1	0.27798	0.27798	0.72202	mus
Olfr1442	10090.ENSMUSP00000050632	OL	0	0	0	0	NOG45899	olfactory receptor 1442	-	-	-	-	104	20	5.2	0.41424	0.181656	0.818344	mus
Olfr1443	10090.ENSMUSP00000059886	OL	0	0	0	0	NOG45899	olfactory receptor 1443	-	-	-	-	104	20	5.2	0.41424	0.181656	0.818344	mus
Olfr1444	10090.ENSMUSP00000062460	OL	0	0	0	0	NOG71436	olfactory receptor 1444; Potential odorant receptor	-	-	-	-	9	9	1	0.34088	0.34088	0.65912	mus
Olfr1445	10090.ENSMUSP00000058933	OL	270	1	2711963	0.9938	NOG45899	olfactory receptor 1445	-	-	-	-	104	20	5.2	0.41424	0.181656	0.818344	mus
Olfr1446	10090.ENSMUSP00000079994	OL	0	0	0	0	-	-	-	-	-	-	-	-	-	-	-	NA	mus
Olfr1447	10090.ENSMUSP00000071419	OL	0	0	0	0	-	-	-	-	-	-	-	-	-	-	-	NA	mus
Olfr1448	10090.ENSMUSP00000055664	OL	270	1	2711963	0.9938	NOG45899	olfactory receptor 1448	-	-	-	-	104	20	5.2	0.41424	0.181656	0.818344	mus
Olfr1449	10090.ENSMUSP00000056181	OL	0	0	0	0	NOG78952	olfactory receptor 1449	-	-	-	-	11	7	1.57143	0.28643	0.228492	0.771508	mus
Olfr145	10090.ENSMUSP00000083229	OL	270	1	2711963	0.9938	NOG44152	olfactory receptor 145; Odorant receptor (Potential)	-	-	-	-	39	17	2.29412	0.41746	0.275618	0.724382	mus
Olfr1450	10090.ENSMUSP00000080666	OL	0	0	0	0	NOG78952	olfactory receptor 1450	-	-	-	-	11	7	1.57143	0.28643	0.228492	0.771508	mus
Olfr1451	10090.ENSMUSP00000049885	OL	270	1	2711963	0.9938	NOG45899	olfactory receptor 1451	-	-	-	-	104	20	5.2	0.41424	0.181656	0.818344	mus
Olfr1453	10090.ENSMUSP00000085071	OL	0	0	0	0	NOG45899	olfactory receptor 1453	-	-	-	-	104	20	5.2	0.41424	0.181656	0.818344	mus
Olfr1454	10090.ENSMUSP00000073409	OL	0	0	0	0	NOG45899	olfactory receptor 1454	-	-	-	-	104	20	5.2	0.41424	0.181656	0.818344	mus
Olfr1457	10090.ENSMUSP00000074665	OL	0	0	0	0	NOG45899	olfactory receptor 1457	-	-	-	-	104	20	5.2	0.41424	0.181656	0.818344	mus
Olfr1458	10090.ENSMUSP00000076019	OL	0	0	0	0	NOG45899	olfactory receptor 1458	-	-	-	-	104	20	5.2	0.41424	0.181656	0.818344	mus
Olfr1459	10090.ENSMUSP00000077414	OL	0	0	0	0	NOG45899	olfactory receptor 1459	-	-	-	-	104	20	5.2	0.41424	0.181656	0.818344	mus
Olfr146	10090.ENSMUSP00000073352	OL	0	0	0	0	NOG124373	olfactory receptor 146; Odorant receptor (Potential)	-	-	-	-	97	20	4.85	0.3752	0.17037	0.82963	mus
Olfr1461	10090.ENSMUSP00000053269	OL	0	0	0	0	-	-	-	-	-	-	-	-	-	-	-	NA	mus
Olfr1462	10090.ENSMUSP00000076107	OL	0	0	0	0	NOG45899	olfactory receptor 1462	-	-	-	-	104	20	5.2	0.41424	0.181656	0.818344	mus
Olfr1463	10090.ENSMUSP00000070872	OL	0	0	0	0	-	-	-	-	-	-	-	-	-	-	-	NA	mus
Olfr1465	10090.ENSMUSP00000079039	OL	0	0	0	0	NOG45899	olfactory receptor 1465	-	-	-	-	104	20	5.2	0.41424	0.181656	0.818344	mus
Olfr1466	10090.ENSMUSP00000075265	OL	0	0	0	0	-	-	-	-	-	-	-	-	-	-	-	NA	mus
Olfr1467	10090.ENSMUSP00000061580	OL	0	0	0	0	NOG45899	olfactory receptor 1467	-	-	-	-	104	20	5.2	0.41424	0.181656	0.818344	mus
Olfr1469	10090.ENSMUSP00000076741	OL	270	1	2711963	0.9938	NOG45899	olfactory receptor 1469	-	-	-	-	104	20	5.2	0.41424	0.181656	0.818344	mus
Olfr147	10090.ENSMUSP00000051933	OL	270	1	2711963	0.9938	NOG44371	olfactory receptor 147; Odorant receptor (Potential)	-	-	-	-	90	16	5.625	0.35322	0.148931	0.851069	mus
Olfr1471	10090.ENSMUSP00000093917	OL	0	0	0	0	NOG80114	olfactory receptor 1471	-	-	-	-	25	13	1.92308	0.36323	0.261929	0.738071	mus
Olfr1472	10090.ENSMUSP00000076707	OL	0	0	0	0	-	-	-	-	-	-	-	-	-	-	-	NA	mus
Olfr1474	10090.ENSMUSP00000093916	OL	0	0	0	0	-	-	-	-	-	-	-	-	-	-	-	NA	mus
Olfr1475	10090.ENSMUSP00000079616	OL	0	0	0	0	-	-	-	-	-	-	-	-	-	-	-	NA	mus
Olfr1477	10090.ENSMUSP00000093915	OL	0	0	0	0	NOG45899	olfactory receptor 1477	-	-	-	-	104	20	5.2	0.41424	0.181656	0.818344	mus
Olfr148	10090.ENSMUSP00000096473	OL	0	0	0	0	NOG148821	olfactory receptor 148; Odorant receptor (Potential)	-	-	-	-	11	6	1.83333	0.2547	0.188109	0.811891	mus
Olfr1480	10090.ENSMUSP00000072076	OL	0	0	0	0	NOG45899	olfactory receptor 1480	-	-	-	-	104	20	5.2	0.41424	0.181656	0.818344	mus
Olfr1484	10090.ENSMUSP00000073811	OL	0	0	0	0	NOG45899	olfactory receptor 1484	-	-	-	-	104	20	5.2	0.41424	0.181656	0.818344	mus
Olfr1487	10090.ENSMUSP00000076128	OL	0	0	0	0	NOG45899	olfactory receptor 1487	-	-	-	-	104	20	5.2	0.41424	0.181656	0.818344	mus
Olfr1489	10090.ENSMUSP00000062444	OL	0	0	0	0	NOG45899	olfactory receptor 1489	-	-	-	-	104	20	5.2	0.41424	0.181656	0.818344	mus
Olfr149	10090.ENSMUSP00000080686	OL	0	0	0	0	NOG87115	olfactory receptor 149; Odorant receptor (Potential)	-	-	-	-	26	17	1.52941	0.42477	0.343472	0.656528	mus
Olfr1490	10090.ENSMUSP00000079057	OL	270	1	2711963	0.9938	NOG42006	olfactory receptor 1490	-	-	-	-	17	14	1.21429	0.4016	0.364445	0.635555	mus
Olfr1491	10090.ENSMUSP00000057902	OL	0	0	0	0	NOG40008	olfactory receptor 1491	-	-	-	-	22	12	1.83333	0.3407	0.251624	0.748376	mus
Olfr1494	10090.ENSMUSP00000056291	OL	270	1	2711963	0.9938	NOG40008	olfactory receptor 1494	-	-	-	-	22	12	1.83333	0.3407	0.251624	0.748376	mus
Olfr1495	10090.ENSMUSP00000057468	OL	0	0	0	0	NOG40008	olfactory receptor 1495	-	-	-	-	22	12	1.83333	0.3407	0.251624	0.748376	mus
Olfr1496	10090.ENSMUSP00000054924	OL	270	1	2711963	0.9938	NOG80114	olfactory receptor 1496	-	-	-	-	25	13	1.92308	0.36323	0.261929	0.738071	mus
Olfr1497	10090.ENSMUSP00000053465	OL	0	0	0	0	NOG47340	olfactory receptor 1497	-	-	-	-	15	14	1.07143	0.40579	0.39203	0.60797	mus
Olfr1499	10090.ENSMUSP00000059747	OL	0	0	0	0	NOG44332	olfactory receptor 1499	-	-	-	-	31	16	1.9375	0.40137	0.288353	0.711647	mus
Olfr15	10090.ENSMUSP00000079720	OL	270	1	2711963	0.9938	NOG40930	olfactory receptor 15; Odorant receptor (Potential). May be involved in the molecular proces [...]	-	-	-	-	15	11	1.36364	0.35196	0.3014	0.6986	mus
Olfr150	10090.ENSMUSP00000077635	OL	0	0	0	0	NOG124373	olfactory receptor 150; Odorant receptor (Potential)	-	-	-	-	97	20	4.85	0.3752	0.17037	0.82963	mus
Olfr1500	10090.ENSMUSP00000067303	OL	0	0	0	0	NOG44319	olfactory receptor 1500	-	-	-	-	16	15	1.06667	0.4167	0.403467	0.596533	mus
Olfr1501	10090.ENSMUSP00000073620	OL	0	0	0	0	NOG86317	olfactory receptor 1501	-	-	-	-	7	5	1.4	0.24044	0.203209	0.796791	mus
Olfr204	10090.ENSMUSP00000072332	OL	0	0	0	0	NOG73470	olfactory receptor 204	-	-	-	-	33	9	3.66667	0.26585	0.138836	0.861164	mus
Olfr1504	10090.ENSMUSP00000077400	OL	0	0	0	0	NOG86317	olfactory receptor 1504	-	-	-	-	7	5	1.4	0.24044	0.203209	0.796791	mus
Olfr1505	10090.ENSMUSP00000080235	OL	0	0	0	0	NOG44332	olfactory receptor 1505	-	-	-	-	31	16	1.9375	0.40137	0.288353	0.711647	mus
Olfr32	10090.ENSMUSP00000097344	OL	0	0	0	0	NOG47746	olfactory receptor 32	-	-	-	-	73	24	3.04167	0.46316	0.265568	0.734432	mus
Olfr1507	10090.ENSMUSP00000073260	OL	0	0	0	0	NOG149798	olfactory receptor 1507	-	-	-	-	7	5	1.4	0.24044	0.203209	0.796791	mus
Olfr1508	10090.ENSMUSP00000077128	OL	270	1	2711963	0.9938	NOG149798	olfactory receptor 1508	-	-	-	-	7	5	1.4	0.24044	0.203209	0.796791	mus
Olfr1509	10090.ENSMUSP00000046688	OL	0	0	0	0	NOG148538	olfactory receptor 1509	-	-	-	-	6	6	1	0.27798	0.27798	0.72202	mus
Olfr151	10090.ENSMUSP00000072257	OL	270	1	2711963	0.9938	NOG145371	olfactory receptor 160; Odorant receptor (Potential)	-	-	-	-	23	14	1.64286	0.37653	0.293764	0.706236	mus
Olfr1510	10090.ENSMUSP00000078424	OL	270	1	2711963	0.9938	NOG147514	olfactory receptor 1510	-	-	-	-	13	10	1.3	0.3483	0.305479	0.694521	mus
Olfr1511	10090.ENSMUSP00000077302	OL	270	1	2711963	0.9938	NOG147514	olfactory receptor 1511	-	-	-	-	13	10	1.3	0.3483	0.305479	0.694521	mus
Olfr1512	10090.ENSMUSP00000071208	OL	270	1	2711963	0.9938	NOG44637	olfactory receptor 1512	-	-	-	-	15	12	1.25	0.37712	0.337306	0.662694	mus
Olfr1513	10090.ENSMUSP00000087171	OL	0	0	0	0	NOG44637	olfactory receptor 1513	-	-	-	-	15	12	1.25	0.37712	0.337306	0.662694	mus
Olfr152	10090.ENSMUSP00000088211	OL	270	1	2711963	0.9938	NOG46580	olfactory receptor 152	-	-	-	-	20	16	1.25	0.41769	0.373593	0.626407	mus
Olfr153	10090.ENSMUSP00000076681	OL	0	0	0	0	NOG40895	olfactory receptor 153	-	-	-	-	79	19	4.15789	0.36906	0.180992	0.819008	mus
Olfr54	10090.ENSMUSP00000072016	OL	0	0	0	0	NOG149787	olfactory receptor 54	-	-	-	-	3	2	1.5	0.09875	0.080629	0.919371	mus
Olfr154	10090.ENSMUSP00000097502	OL	0	0	0	0	NOG77729	olfactory receptor 154; Potential odorant receptor	-	-	-	-	22	12	1.83333	0.36463	0.269297	0.730703	mus
Olfr155	10090.ENSMUSP00000092726	OL	0	0	0	0	NOG115418	olfactory receptor 155	-	-	-	-	4	4	1	0.21507	0.21507	0.78493	mus
Olfr156	10090.ENSMUSP00000078431	OL	0	0	0	0	NOG87339	olfactory receptor 156	-	-	-	-	45	19	2.36842	0.43125	0.28022	0.71978	mus
Olfr157	10090.ENSMUSP00000078226	OL	0	0	0	0	NOG87339	olfactory receptor 157	-	-	-	-	45	19	2.36842	0.43125	0.28022	0.71978	mus
Olfr159	10090.ENSMUSP00000060784	OL	0	0	0	0	NOG87339	olfactory receptor 159	-	-	-	-	45	19	2.36842	0.43125	0.28022	0.71978	mus
Olfr16	10090.ENSMUSP00000041524	OL	270	1	2711963	0.9938	NOG40781	olfactory receptor 16	-	-	-	-	9	8	1.125	0.31698	0.298852	0.701148	mus
Olfr1254	10090.ENSMUSP00000097352	OL	0	0	0	0	NOG148434	olfactory receptor 1254	-	-	-	-	3	3	1	0.17044	0.17044	0.82956	mus
Olfr161	10090.ENSMUSP00000058956	OL	0	0	0	0	NOG150110	olfactory receptor 161	-	-	-	-	58	15	3.86667	0.34287	0.174366	0.825634	mus
Olfr164	10090.ENSMUSP00000056970	OL	270	1	2711963	0.9938	NOG42540	olfactory receptor 164	-	-	-	-	47	15	3.13333	0.39917	0.225504	0.774496	mus
Olfr165	10090.ENSMUSP00000062079	OL	0	0	0	0	NOG42540	olfactory receptor 165	-	-	-	-	47	15	3.13333	0.39917	0.225504	0.774496	mus
Olfr166	10090.ENSMUSP00000074299	OL	270	1	2711963	0.9938	NOG44451	olfactory receptor 166	-	-	-	-	91	19	4.78947	0.422	0.192827	0.807173	mus
Olfr167	10090.ENSMUSP00000055344	OL	270	1	2711963	0.9938	NOG44451	olfactory receptor 167	-	-	-	-	91	19	4.78947	0.422	0.192827	0.807173	mus
Olfr168	10090.ENSMUSP00000077632	OL	270	1	2711963	0.9938	NOG44451	olfactory receptor 168	-	-	-	-	91	19	4.78947	0.422	0.192827	0.807173	mus
Olfr169	10090.ENSMUSP00000087516	OL	270	1	2711963	0.9938	NOG42559	olfactory receptor 169	-	-	-	-	15	11	1.36364	0.35737	0.306033	0.693967	mus
Olfr17	10090.ENSMUSP00000095741	OL	270	1	2711963	0.9938	NOG38940	olfactory receptor 17	-	-	-	-	24	16	1.5	0.37655	0.307452	0.692548	mus
Olfr170	10090.ENSMUSP00000077674	OL	0	0	0	0	NOG42559	olfactory receptor 170	-	-	-	-	15	11	1.36364	0.35737	0.306033	0.693967	mus
Olfr171	10090.ENSMUSP00000078814	OL	0	0	0	0	NOG42559	olfactory receptor 171	-	-	-	-	15	11	1.36364	0.35737	0.306033	0.693967	mus
Olfr172	10090.ENSMUSP00000093690	OL	270	1	2711963	0.9938	NOG44330	olfactory receptor 172	-	-	-	-	56	17	3.29412	0.40478	0.223023	0.776977	mus
Olfr173	10090.ENSMUSP00000052798	OL	270	1	2711963	0.9938	NOG44330	olfactory receptor 173	-	-	-	-	56	17	3.29412	0.40478	0.223023	0.776977	mus
Olfr812	10090.ENSMUSP00000053359	OL	0	0	0	0	NOG79829	olfactory receptor 812	-	-	-	-	57	18	3.16667	0.40434	0.227219	0.772781	mus
Olfr58	10090.ENSMUSP00000078603	OL	0	0	0	0	NOG46199	olfactory receptor 58	-	-	-	-	58	12	4.83333	0.34704	0.157854	0.842146	mus
Olfr178	10090.ENSMUSP00000049578	OL	0	0	0	0	NOG125919	olfactory receptor 178	-	-	-	-	10	6	1.66667	0.25496	0.197491	0.802509	mus
Olfr179	10090.ENSMUSP00000071913	OL	270	1	2711963	0.9938	NOG67819	olfactory receptor 179	-	-	-	-	28	16	1.75	0.41319	0.312342	0.687658	mus
Olfr18	10090.ENSMUSP00000083664	OL	270	1	2711963	0.9938	NOG46199	olfactory receptor 18; Odorant receptor (Potential)	-	-	-	-	58	12	4.83333	0.34704	0.157854	0.842146	mus
Olfr180	10090.ENSMUSP00000093688	OL	0	0	0	0	NOG125919	olfactory receptor 180; Potential odorant receptor	-	-	-	-	10	6	1.66667	0.25496	0.197491	0.802509	mus
Olfr181	10090.ENSMUSP00000074825	OL	0	0	0	0	NOG125919	olfactory receptor 181; Potential odorant receptor	-	-	-	-	10	6	1.66667	0.25496	0.197491	0.802509	mus
Olfr183	10090.ENSMUSP00000080602	OL	0	0	0	0	NOG40374	olfactory receptor 183; Potential odorant receptor	-	-	-	-	48	15	3.2	0.36644	0.204846	0.795154	mus
Olfr186	10090.ENSMUSP00000056448	OL	0	0	0	0	NOG40374	olfactory receptor 186; Potential odorant receptor	-	-	-	-	48	15	3.2	0.36644	0.204846	0.795154	mus
Olfr187	10090.ENSMUSP00000052477	OL	0	0	0	0	NOG40374	olfactory receptor 187; Potential odorant receptor	-	-	-	-	48	15	3.2	0.36644	0.204846	0.795154	mus
Olfr19	10090.ENSMUSP00000053393	OL	270	1	2711963	0.9938	NOG147368	olfactory receptor 19; Odorant receptor (Potential)	-	-	-	-	41	13	3.15385	0.36135	0.203473	0.796527	mus
Olfr190	10090.ENSMUSP00000071224	OL	0	0	0	0	NOG40374	olfactory receptor 190	-	-	-	-	48	15	3.2	0.36644	0.204846	0.795154	mus
Olfr191	10090.ENSMUSP00000077604	OL	0	0	0	0	NOG40374	olfactory receptor 191	-	-	-	-	48	15	3.2	0.36644	0.204846	0.795154	mus
Olfr1008	10090.ENSMUSP00000061191	OL	0	0	0	0	NOG125539	olfactory receptor 1008	-	-	-	-	40	15	2.66667	0.34534	0.211477	0.788523	mus
Olfr193	10090.ENSMUSP00000075611	OL	0	0	0	0	NOG40374	olfactory receptor 193	-	-	-	-	48	15	3.2	0.36644	0.204846	0.795154	mus
Olfr194	10090.ENSMUSP00000072407	OL	0	0	0	0	NOG73470	olfactory receptor 194	-	-	-	-	33	9	3.66667	0.26585	0.138836	0.861164	mus
Olfr195	10090.ENSMUSP00000073737	OL	0	0	0	0	NOG44330	olfactory receptor 195	-	-	-	-	56	17	3.29412	0.40478	0.223023	0.776977	mus
Olfr196	10090.ENSMUSP00000076285	OL	270	1	2711963	0.9938	NOG40374	olfactory receptor 196	-	-	-	-	48	15	3.2	0.36644	0.204846	0.795154	mus
Olfr1099	10090.ENSMUSP00000097456	OL	0	0	0	0	NOG78193	olfactory receptor 1099	-	-	-	-	30	16	1.875	0.39768	0.290424	0.709576	mus
Olfr198	10090.ENSMUSP00000065535	OL	270	1	2711963	0.9938	NOG73470	olfactory receptor 198	-	-	-	-	33	9	3.66667	0.26585	0.138836	0.861164	mus
Olfr199	10090.ENSMUSP00000097249	OL	0	0	0	0	NOG73470	olfactory receptor 199	-	-	-	-	33	9	3.66667	0.26585	0.138836	0.861164	mus
Olfr2	10090.ENSMUSP00000091656	OL	270	1	2711963	0.9938	NOG48149	olfactory receptor 2	-	-	-	-	50	21	2.38095	0.44725	0.289851	0.710149	mus
Olfr20	10090.ENSMUSP00000074011	OL	0	0	0	0	NOG44681	olfactory receptor 20	-	-	-	-	65	21	3.09524	0.42959	0.244178	0.755822	mus
Olfr201	10090.ENSMUSP00000097248	OL	0	0	0	0	NOG73470	olfactory receptor 201	-	-	-	-	33	9	3.66667	0.26585	0.138836	0.861164	mus
Olfr202	10090.ENSMUSP00000059496	OL	270	1	2711963	0.9938	NOG73470	olfactory receptor 202	-	-	-	-	33	9	3.66667	0.26585	0.138836	0.861164	mus
Olfr203	10090.ENSMUSP00000086719	OL	0	0	0	0	NOG73470	olfactory receptor 203	-	-	-	-	33	9	3.66667	0.26585	0.138836	0.861164	mus
Olfr204	10090.ENSMUSP00000072332	OL	0	0	0	0	NOG73470	olfactory receptor 204	-	-	-	-	33	9	3.66667	0.26585	0.138836	0.861164	mus
Olfr205	10090.ENSMUSP00000073762	OL	0	0	0	0	NOG73470	olfactory receptor 205	-	-	-	-	33	9	3.66667	0.26585	0.138836	0.861164	mus
Olfr206	10090.ENSMUSP00000081849	OL	0	0	0	0	NOG73470	olfactory receptor 206	-	-	-	-	33	9	3.66667	0.26585	0.138836	0.861164	mus
Olfr888	10090.ENSMUSP00000074713	OL	0	0	0	0	NOG76317	olfactory receptor 888	-	-	-	-	39	10	3.9	0.30088	0.152357	0.847643	mus
Olfr898	10090.ENSMUSP00000075824	OL	0	0	0	0	NOG68623	olfactory receptor 898	-	-	-	-	15	5	3	0.18693	0.107924	0.892076	mus
Olfr609	10090.ENSMUSP00000051749	OL	0	0	0	0	NOG45255	olfactory receptor 609	-	-	-	-	18	15	1.2	0.41257	0.376623	0.623377	mus
Olfr211	10090.ENSMUSP00000066524	OL	0	0	0	0	NOG45616	olfactory receptor 211	-	-	-	-	52	16	3.25	0.3444	0.191039	0.808961	mus
Olfr212	10090.ENSMUSP00000075164	OL	0	0	0	0	NOG127544	olfactory receptor 212	-	-	-	-	20	6	3.33333	0.23203	0.127088	0.872912	mus
Olfr1445	10090.ENSMUSP00000058933	OL	270	1	2711963	0.9938	NOG45899	olfactory receptor 1445	-	-	-	-	104	20	5.2	0.41424	0.181656	0.818344	mus
Olfr214	10090.ENSMUSP00000052730	OL	0	0	0	0	NOG127544	olfactory receptor 214	-	-	-	-	20	6	3.33333	0.23203	0.127088	0.872912	mus
Olfr215	10090.ENSMUSP00000052425	OL	0	0	0	0	NOG127544	olfactory receptor 215	-	-	-	-	20	6	3.33333	0.23203	0.127088	0.872912	mus
Olfr218	10090.ENSMUSP00000053317	OL	270	1	2711963	0.9938	NOG148711	olfactory receptor 218	-	-	-	-	12	10	1.2	0.34967	0.319204	0.680796	mus
Olfr220	10090.ENSMUSP00000083023	OL	0	0	0	0	NOG45783	olfactory receptor 220	-	-	-	-	12	12	1	0.38551	0.38551	0.61449	mus
Olfr221	10090.ENSMUSP00000063109	OL	270	1	2711963	0.9938	NOG46852	olfactory receptor 1514	-	-	-	-	8	8	1	0.32261	0.32261	0.67739	mus
Olfr222	10090.ENSMUSP00000071835	OL	270	1	2711963	0.9938	NOG39029	olfactory receptor 222	-	-	-	-	52	18	2.88889	0.42061	0.247465	0.752535	mus
Olfr223	10090.ENSMUSP00000054824	OL	0	0	0	0	NOG140413	olfactory receptor 223	-	-	-	-	4	4	1	0.21507	0.21507	0.78493	mus
Olfr224	10090.ENSMUSP00000079881	OL	270	1	2711963	0.9938	NOG45249	olfactory receptor 224	-	-	-	-	51	17	3	0.40375	0.233105	0.766895	mus
Olfr225	10090.ENSMUSP00000051482	OL	0	0	0	0	NOG41945	olfactory receptor 225	-	-	-	-	28	16	1.75	0.39556	0.299015	0.700985	mus
Olfr228	10090.ENSMUSP00000097468	OL	0	0	0	0	NOG129290	olfactory receptor 228	-	-	-	-	98	17	5.76471	0.33176	0.138177	0.861823	mus
Olfr229	10090.ENSMUSP00000076080	OL	0	0	0	0	NOG124373	olfactory receptor 973	-	-	-	-	97	20	4.85	0.3752	0.17037	0.82963	mus
Olfr23	10090.ENSMUSP00000090596	OL	0	0	0	0	NOG44681	olfactory receptor 23	-	-	-	-	65	21	3.09524	0.42959	0.244178	0.755822	mus
Olfr231	10090.ENSMUSP00000059596	OL	270	1	2711963	0.9938	NOG46470	olfactory receptor 244	-	-	-	-	12	12	1	0.38551	0.38551	0.61449	mus
Olfr623	10090.ENSMUSP00000070658	OL	0	0	0	0	NOG42936	olfactory receptor 623	-	-	-	-	52	19	2.73684	0.43289	0.261669	0.738331	mus
Olfr913	10090.ENSMUSP00000079876	OL	0	0	0	0	NOG44371	olfactory receptor 913	-	-	-	-	90	16	5.625	0.35322	0.148931	0.851069	mus
Olfr1395	10090.ENSMUSP00000050142	OL	0	0	0	0	NOG44407	olfactory receptor 1395	-	-	-	-	9	8	1.125	0.31698	0.298852	0.701148	mus
Olfr24	10090.ENSMUSP00000064189	OL	270	1	2711963	0.9938	NOG146353	olfactory receptor 24; Odorant receptor (Potential)	-	-	-	-	16	14	1.14286	0.40326	0.377215	0.622785	mus
Olfr914	10090.ENSMUSP00000053405	OL	0	0	0	0	NOG44371	olfactory receptor 914	-	-	-	-	90	16	5.625	0.35322	0.148931	0.851069	mus
Olfr243	10090.ENSMUSP00000095796	OL	0	0	0	0	NOG86443	olfactory receptor 627	-	-	-	-	95	21	4.52381	0.43317	0.20366	0.79634	mus
Olfr287	10090.ENSMUSP00000097806	OL	270	1	2711963	0.9938	NOG45259	olfactory receptor 288	-	-	-	-	23	14	1.64286	0.3917	0.3056	0.6944	mus
Olfr657	10090.ENSMUSP00000095773	OL	270	1	2711963	0.9938	NOG40164	olfactory receptor 657	-	-	-	-	22	12	1.83333	0.35117	0.259356	0.740644	mus
Olfr25	10090.ENSMUSP00000071393	OL	0	0	0	0	NOG68623	olfactory receptor 25	-	-	-	-	15	5	3	0.18693	0.107924	0.892076	mus
Olfr250	10090.ENSMUSP00000051631	OL	0	0	0	0	NOG68623	olfactory receptor 250	-	-	-	-	15	5	3	0.18693	0.107924	0.892076	mus
Olfr251	10090.ENSMUSP00000072514	OL	0	0	0	0	NOG68623	olfactory receptor 251	-	-	-	-	15	5	3	0.18693	0.107924	0.892076	mus
Olfr934	10090.ENSMUSP00000073835	OL	0	0	0	0	NOG87115	olfactory receptor 934	-	-	-	-	26	17	1.52941	0.42477	0.343472	0.656528	mus
Olfr935	10090.ENSMUSP00000079572	OL	0	0	0	0	NOG124373	olfactory receptor 935	-	-	-	-	97	20	4.85	0.3752	0.17037	0.82963	mus
Olfr938	10090.ENSMUSP00000055053	OL	0	0	0	0	NOG124373	olfactory receptor 938	-	-	-	-	97	20	4.85	0.3752	0.17037	0.82963	mus
Olfr259	10090.ENSMUSP00000097448	OL	0	0	0	0	NOG46809	olfactory receptor 259	-	-	-	-	25	13	1.92308	0.35463	0.255727	0.744273	mus
Olfr26	10090.ENSMUSP00000080385	OL	270	1	2711963	0.9938	NOG44891	olfactory receptor 26	-	-	-	-	40	10	4	0.20946	0.10473	0.89527	mus
Olfr262	10090.ENSMUSP00000085120	OL	270	1	2711963	0.9938	NOG127675	olfactory receptor 262	-	-	-	-	56	18	3.11111	0.41493	0.235243	0.764757	mus
Olfr266	10090.ENSMUSP00000054070	OL	0	0	0	0	NOG47967	olfactory receptor 266	-	-	-	-	18	10	1.8	0.32675	0.243545	0.756455	mus
Olfr267	10090.ENSMUSP00000062002	OL	270	1	2711963	0.9938	NOG146062	olfactory receptor 267	-	-	-	-	10	10	1	0.35723	0.35723	0.64277	mus
Olfr270	10090.ENSMUSP00000092699	OL	0	0	0	0	NOG72440	olfactory receptor 270	-	-	-	-	15	10	1.5	0.33762	0.275666	0.724334	mus
Olfr272	10090.ENSMUSP00000055721	OL	0	0	0	0	NOG43489	olfactory receptor 272	-	-	-	-	21	18	1.16667	0.43774	0.405268	0.594732	mus
Olfr273	10090.ENSMUSP00000052080	OL	0	0	0	0	NOG42676	olfactory receptor 273	-	-	-	-	27	15	1.8	0.39339	0.293216	0.706784	mus
Olfr15	10090.ENSMUSP00000079720	OL	270	1	2711963	0.9938	NOG40930	olfactory receptor 15; Odorant receptor (Potential). May be involved in the molecular proces [...]	-	-	-	-	15	11	1.36364	0.35196	0.3014	0.6986	mus
Olfr631	10090.ENSMUSP00000059317	OL	270	1	2711963	0.9938	NOG38847	olfactory receptor 631	-	-	-	-	11	11	1	0.37201	0.37201	0.62799	mus
Olfr281	10090.ENSMUSP00000060754	OL	0	0	0	0	NOG77860	olfactory receptor 281	-	-	-	-	51	17	3	0.38451	0.221997	0.778003	mus
Olfr282	10090.ENSMUSP00000075248	OL	0	0	0	0	NOG79435	olfactory receptor 282	-	-	-	-	7	6	1.16667	0.27117	0.251054	0.748946	mus
Olfr283	10090.ENSMUSP00000051239	OL	0	0	0	0	NOG44625	olfactory receptor 283	-	-	-	-	8	7	1.14286	0.29572	0.27662	0.72338	mus
Olfr284	10090.ENSMUSP00000065626	OL	0	0	0	0	NOG147196	olfactory receptor 284	-	-	-	-	5	5	1	0.24969	0.24969	0.75031	mus
Olfr646	10090.ENSMUSP00000095784	OL	270	1	2711963	0.9938	NOG48158	olfactory receptor 646	-	-	-	-	23	17	1.35294	0.42681	0.36694	0.63306	mus
Olfr286	10090.ENSMUSP00000073296	OL	270	1	2711963	0.9938	NOG45259	olfactory receptor 286	-	-	-	-	23	14	1.64286	0.3917	0.3056	0.6944	mus
Olfr195	10090.ENSMUSP00000073737	OL	0	0	0	0	NOG44330	olfactory receptor 195	-	-	-	-	56	17	3.29412	0.40478	0.223023	0.776977	mus
Olfr651	10090.ENSMUSP00000095778	OL	0	0	0	0	NOG86134	olfactory receptor 651	-	-	-	-	48	20	2.4	0.43527	0.280966	0.719034	mus
Olfr290	10090.ENSMUSP00000073172	OL	0	0	0	0	NOG74246	olfactory receptor 290	-	-	-	-	37	17	2.17647	0.4003	0.271337	0.728663	mus
Olfr291	10090.ENSMUSP00000077303	OL	0	0	0	0	NOG74246	olfactory receptor 291	-	-	-	-	37	17	2.17647	0.4003	0.271337	0.728663	mus
Olfr292	10090.ENSMUSP00000079060	OL	270	1	2711963	0.9938	NOG44311	olfactory receptor 292	-	-	-	-	77	14	5.5	0.33429	0.142542	0.857458	mus
Olfr293	10090.ENSMUSP00000080193	OL	0	0	0	0	NOG44311	olfactory receptor 293	-	-	-	-	77	14	5.5	0.33429	0.142542	0.857458	mus
Olfr294	10090.ENSMUSP00000077662	OL	270	1	2711963	0.9938	NOG132856	olfactory receptor 294	-	-	-	-	429	22	19.5	0.30323	0.0686681	0.931332	mus
Olfr295	10090.ENSMUSP00000077542	OL	270	1	2711963	0.9938	NOG44311	olfactory receptor 295	-	-	-	-	77	14	5.5	0.33429	0.142542	0.857458	mus
Fzd2	10090.ENSMUSP00000091463	OL	42	0.4634	332857	0.5292	-	-	KOG3577	frizzled homolog 2 (Drosophila); Receptor for Wnt proteins. Most of frizzled receptors are c [...]	-	-	467	34	13.7353	0.86303	0.232866	0.767134	mus
Olfr298	10090.ENSMUSP00000076973	OL	0	0	0	0	NOG132856	olfactory receptor 298	-	-	-	-	429	22	19.5	0.30323	0.0686681	0.931332	mus
Olfr299	10090.ENSMUSP00000062434	OL	0	0	0	0	NOG44311	olfactory receptor 299	-	-	-	-	77	14	5.5	0.33429	0.142542	0.857458	mus
Olfr3	10090.ENSMUSP00000097728	OL	270	1	2711963	0.9938	NOG46978	olfactory receptor 3; Odorant receptor (Potential)	-	-	-	-	61	18	3.38889	0.39436	0.214222	0.785778	mus
Olfr30	10090.ENSMUSP00000055961	OL	0	0	0	0	NOG79224	olfactory receptor 30	-	-	-	-	27	19	1.42105	0.43662	0.366268	0.633732	mus
Olfr301	10090.ENSMUSP00000072955	OL	270	1	2711963	0.9938	NOG44311	olfactory receptor 301	-	-	-	-	77	14	5.5	0.33429	0.142542	0.857458	mus
Olfr943	10090.ENSMUSP00000071545	OL	0	0	0	0	NOG47818	olfactory receptor 943	-	-	-	-	32	8	4	0.30624	0.15312	0.84688	mus
Olfr303	10090.ENSMUSP00000062459	OL	0	0	0	0	NOG73549	olfactory receptor 303	-	-	-	-	12	8	1.5	0.31382	0.256233	0.743767	mus
Olfr304	10090.ENSMUSP00000076449	OL	270	1	2711963	0.9938	NOG132856	olfactory receptor 304	-	-	-	-	429	22	19.5	0.30323	0.0686681	0.931332	mus
Olfr305	10090.ENSMUSP00000068650	OL	270	1	2711963	0.9938	NOG132856	olfactory receptor 305	-	-	-	-	429	22	19.5	0.30323	0.0686681	0.931332	mus
Olfr307	10090.ENSMUSP00000063538	OL	270	1	2711963	0.9938	NOG132856	olfactory receptor 307	-	-	-	-	429	22	19.5	0.30323	0.0686681	0.931332	mus
Olfr308	10090.ENSMUSP00000049454	OL	270	1	2711963	0.9938	NOG146470	olfactory receptor 308	-	-	-	-	20	14	1.42857	0.39618	0.331468	0.668532	mus
Olfr309	10090.ENSMUSP00000061929	OL	0	0	0	0	NOG83434	olfactory receptor 309	-	-	-	-	23	13	1.76923	0.373	0.280425	0.719575	mus
Olfr31	10090.ENSMUSP00000098434	OL	270	1	2711963	0.9938	NOG150007	olfactory receptor 31	-	-	-	-	11	10	1.1	0.35246	0.336057	0.663943	mus
Olfr310	10090.ENSMUSP00000080589	OL	0	0	0	0	NOG44311	olfactory receptor 310	-	-	-	-	77	14	5.5	0.33429	0.142542	0.857458	mus
Olfr311	10090.ENSMUSP00000071553	OL	0	0	0	0	NOG83140	olfactory receptor 311	-	-	-	-	18	7	2.57143	0.26017	0.162244	0.837756	mus
Olfr312	10090.ENSMUSP00000077344	OL	0	0	0	0	NOG83140	olfactory receptor 312	-	-	-	-	18	7	2.57143	0.26017	0.162244	0.837756	mus
Olfr313	10090.ENSMUSP00000080852	OL	0	0	0	0	NOG83140	olfactory receptor 313	-	-	-	-	18	7	2.57143	0.26017	0.162244	0.837756	mus
Olfr314	10090.ENSMUSP00000075729	OL	270	1	2711963	0.9938	NOG47682	olfactory receptor 314	-	-	-	-	50	14	3.57143	0.35016	0.185287	0.814713	mus
Olfr315	10090.ENSMUSP00000080248	OL	0	0	0	0	NOG47682	olfactory receptor 315	-	-	-	-	50	14	3.57143	0.35016	0.185287	0.814713	mus
Olfr316	10090.ENSMUSP00000072766	OL	270	1	2711963	0.9938	NOG45573	olfactory receptor 316	-	-	-	-	30	7	4.28571	0.22571	0.109028	0.890972	mus
Olfr225	10090.ENSMUSP00000051482	OL	0	0	0	0	NOG41945	olfactory receptor 225	-	-	-	-	28	16	1.75	0.39556	0.299015	0.700985	mus
Olfr318	10090.ENSMUSP00000073919	OL	270	1	2711963	0.9938	NOG45573	olfactory receptor 318	-	-	-	-	30	7	4.28571	0.22571	0.109028	0.890972	mus
Olfr319	10090.ENSMUSP00000076232	OL	0	0	0	0	NOG45573	olfactory receptor 319	-	-	-	-	30	7	4.28571	0.22571	0.109028	0.890972	mus
Olfr32	10090.ENSMUSP00000097344	OL	0	0	0	0	NOG47746	olfactory receptor 32	-	-	-	-	73	24	3.04167	0.46316	0.265568	0.734432	mus
Olfr320	10090.ENSMUSP00000080924	OL	270	1	2711963	0.9938	NOG45573	olfactory receptor 320	-	-	-	-	30	7	4.28571	0.22571	0.109028	0.890972	mus
Olfr323	10090.ENSMUSP00000068147	OL	0	0	0	0	NOG128310	olfactory receptor 323	-	-	-	-	25	11	2.27273	0.2473	0.16404	0.83596	mus
Olfr324	10090.ENSMUSP00000056457	OL	0	0	0	0	NOG150849	olfactory receptor 324	-	-	-	-	3	3	1	0.17044	0.17044	0.82956	mus
Olfr325	10090.ENSMUSP00000076168	OL	270	1	2711963	0.9938	NOG45249	olfactory receptor 325	-	-	-	-	51	17	3	0.40375	0.233105	0.766895	mus
Olfr328	10090.ENSMUSP00000073588	OL	270	1	2711963	0.9938	NOG45249	olfactory receptor 328	-	-	-	-	51	17	3	0.40375	0.233105	0.766895	mus
Olfr33	10090.ENSMUSP00000081877	OL	0	0	0	0	NOG122777	olfactory receptor 33	-	-	-	-	14	7	2	0.2845	0.201172	0.798828	mus
Olfr330	10090.ENSMUSP00000063194	OL	270	1	2711963	0.9938	NOG45249	olfactory receptor 330	-	-	-	-	51	17	3	0.40375	0.233105	0.766895	mus
Olfr331	10090.ENSMUSP00000080440	OL	270	1	2711963	0.9938	NOG45249	olfactory receptor 331	-	-	-	-	51	17	3	0.40375	0.233105	0.766895	mus
Olfr332	10090.ENSMUSP00000063076	OL	0	0	0	0	NOG44451	olfactory receptor 332	-	-	-	-	91	19	4.78947	0.422	0.192827	0.807173	mus
Olfr338	10090.ENSMUSP00000088528	OL	0	0	0	0	NOG46978	olfactory receptor 338	-	-	-	-	61	18	3.38889	0.39436	0.214222	0.785778	mus
Olfr339	10090.ENSMUSP00000071383	OL	0	0	0	0	NOG46978	olfactory receptor 339	-	-	-	-	61	18	3.38889	0.39436	0.214222	0.785778	mus
Olfr340	10090.ENSMUSP00000072632	OL	0	0	0	0	NOG46978	olfactory receptor 340	-	-	-	-	61	18	3.38889	0.39436	0.214222	0.785778	mus
Olfr341	10090.ENSMUSP00000097731	OL	0	0	0	0	NOG46978	olfactory receptor 341	-	-	-	-	61	18	3.38889	0.39436	0.214222	0.785778	mus
Olfr342	10090.ENSMUSP00000073818	OL	0	0	0	0	NOG46978	olfactory receptor 342	-	-	-	-	61	18	3.38889	0.39436	0.214222	0.785778	mus
Olfr344	10090.ENSMUSP00000074919	OL	0	0	0	0	NOG46978	olfactory receptor 344	-	-	-	-	61	18	3.38889	0.39436	0.214222	0.785778	mus
Olfr345	10090.ENSMUSP00000076122	OL	0	0	0	0	NOG46978	olfactory receptor 345	-	-	-	-	61	18	3.38889	0.39436	0.214222	0.785778	mus
Olfr346	10090.ENSMUSP00000077897	OL	0	0	0	0	NOG46978	olfactory receptor 346	-	-	-	-	61	18	3.38889	0.39436	0.214222	0.785778	mus
Olfr347	10090.ENSMUSP00000077819	OL	0	0	0	0	-	-	-	-	-	-	-	-	-	-	-	NA	mus
Olfr348	10090.ENSMUSP00000054037	OL	0	0	0	0	NOG46978	olfactory receptor 348	-	-	-	-	61	18	3.38889	0.39436	0.214222	0.785778	mus
Olfr350	10090.ENSMUSP00000053105	OL	270	1	2711963	0.9938	NOG46978	olfactory receptor 350	-	-	-	-	61	18	3.38889	0.39436	0.214222	0.785778	mus
Olfr351	10090.ENSMUSP00000097727	OL	270	1	2711963	0.9938	NOG149121	olfactory receptor 351	-	-	-	-	9	6	1.5	0.26919	0.219793	0.780207	mus
Olfr352	10090.ENSMUSP00000070758	OL	0	0	0	0	NOG46978	olfactory receptor 352	-	-	-	-	61	18	3.38889	0.39436	0.214222	0.785778	mus
Olfr353	10090.ENSMUSP00000097726	OL	0	0	0	0	NOG149121	olfactory receptor 353	-	-	-	-	9	6	1.5	0.26919	0.219793	0.780207	mus
Olfr354	10090.ENSMUSP00000068986	OL	270	1	2711963	0.9938	NOG150582	olfactory receptor 354	-	-	-	-	10	10	1	0.35723	0.35723	0.64277	mus
Olfr355	10090.ENSMUSP00000097725	OL	270	1	2711963	0.9938	NOG44632	olfactory receptor 355	-	-	-	-	52	20	2.6	0.43643	0.270662	0.729338	mus
Olfr356	10090.ENSMUSP00000092631	OL	0	0	0	0	NOG146837	olfactory receptor 356	-	-	-	-	4	4	1	0.21507	0.21507	0.78493	mus
Olfr357	10090.ENSMUSP00000066272	OL	270	1	2711963	0.9938	NOG147348	olfactory receptor 357	-	-	-	-	14	14	1	0.40943	0.40943	0.59057	mus
Olfr358	10090.ENSMUSP00000097724	OL	0	0	0	0	NOG74917	olfactory receptor 358	-	-	-	-	10	4	2.5	0.20383	0.128913	0.871087	mus
Olfr1474	10090.ENSMUSP00000093916	OL	0	0	0	0	-	-	-	-	-	-	-	-	-	-	-	-	mus
Olfr361	10090.ENSMUSP00000097723	OL	0	0	0	0	NOG74917	olfactory receptor 361	-	-	-	-	10	4	2.5	0.20383	0.128913	0.871087	mus
Olfr362	10090.ENSMUSP00000097722	OL	270	1	2711963	0.9938	NOG46614	olfactory receptor 362	-	-	-	-	12	12	1	0.38551	0.38551	0.61449	mus
Olfr365	10090.ENSMUSP00000073801	OL	270	1	2711963	0.9938	NOG44632	olfactory receptor 365	-	-	-	-	52	20	2.6	0.43643	0.270662	0.729338	mus
Olfr366	10090.ENSMUSP00000088524	OL	0	0	0	0	NOG148689	olfactory receptor 366	-	-	-	-	17	11	1.54545	0.34081	0.274148	0.725852	mus
Olfr368	10090.ENSMUSP00000054082	OL	270	1	2711963	0.9938	NOG42277	olfactory receptor 368	-	-	-	-	10	10	1	0.35723	0.35723	0.64277	mus
Olfr370	10090.ENSMUSP00000055435	OL	270	1	2711963	0.9938	NOG40813	olfactory receptor 370	-	-	-	-	27	18	1.5	0.43662	0.356499	0.643501	mus
Olfr371	10090.ENSMUSP00000077921	OL	270	1	2711963	0.9938	NOG41548	olfactory receptor 371	-	-	-	-	46	17	2.70588	0.38843	0.236134	0.763866	mus
Olfr1180	10090.ENSMUSP00000097412	OL	270	1	2711963	0.9938	NOG131464	olfactory receptor 1180	-	-	-	-	51	19	2.68421	0.41627	0.254078	0.745922	mus
Olfr654	10090.ENSMUSP00000095775	OL	0	0	0	0	NOG129273	olfactory receptor 654	-	-	-	-	9	6	1.5	0.26017	0.212428	0.787572	mus
Olfr374	10090.ENSMUSP00000054673	OL	0	0	0	0	NOG150110	olfactory receptor 374	-	-	-	-	58	15	3.86667	0.34287	0.174366	0.825634	mus
Olfr376	10090.ENSMUSP00000077977	OL	0	0	0	0	NOG44681	olfactory receptor 376	-	-	-	-	65	21	3.09524	0.42959	0.244178	0.755822	mus
Olfr378	10090.ENSMUSP00000066971	OL	0	0	0	0	NOG44681	olfactory receptor 378	-	-	-	-	65	21	3.09524	0.42959	0.244178	0.755822	mus
Olfr38	10090.ENSMUSP00000093654	OL	0	0	0	0	NOG79840	olfactory receptor 38	-	-	-	-	39	17	2.29412	0.40463	0.267147	0.732853	mus
Olfr380	10090.ENSMUSP00000074971	OL	270	1	2711963	0.9938	-	-	-	-	-	-	-	-	-	-	-	NA	mus
Olfr381	10090.ENSMUSP00000077467	OL	0	0	0	0	-	-	-	-	-	-	-	-	-	-	-	NA	mus
Olfr382	10090.ENSMUSP00000091575	OL	0	0	0	0	-	-	-	-	-	-	-	-	-	-	-	NA	mus
Olfr384	10090.ENSMUSP00000072758	OL	0	0	0	0	NOG148448	olfactory receptor 386	-	-	-	-	7	6	1.16667	0.27117	0.251054	0.748946	mus
Olfr385	10090.ENSMUSP00000071484	OL	0	0	0	0	NOG148448	olfactory receptor 385	-	-	-	-	7	6	1.16667	0.27117	0.251054	0.748946	mus
Olfr389	10090.ENSMUSP00000091574	OL	0	0	0	0	-	-	-	-	-	-	-	-	-	-	-	NA	mus
Olfr39	10090.ENSMUSP00000071641	OL	270	1	2711963	0.9938	NOG150292	olfactory receptor 39	-	-	-	-	111	21	5.28571	0.44183	0.192178	0.807822	mus
Olfr390	10090.ENSMUSP00000090598	OL	0	0	0	0	NOG44681	olfactory receptor 390	-	-	-	-	65	21	3.09524	0.42959	0.244178	0.755822	mus
Olfr392	10090.ENSMUSP00000079683	OL	0	0	0	0	-	-	-	-	-	-	-	-	-	-	-	NA	mus
Olfr393	10090.ENSMUSP00000099582	OL	0	0	0	0	NOG151323	olfactory receptor 393	-	-	-	-	6	3	2	0.15691	0.110952	0.889048	mus
Olfr394	10090.ENSMUSP00000071415	OL	0	0	0	0	NOG151323	olfactory receptor 394	-	-	-	-	6	3	2	0.15691	0.110952	0.889048	mus
Olfr395	10090.ENSMUSP00000072756	OL	0	0	0	0	-	-	-	-	-	-	-	-	-	-	-	NA	mus
Olfr397	10090.ENSMUSP00000090595	OL	0	0	0	0	NOG44681	olfactory receptor 397	-	-	-	-	65	21	3.09524	0.42959	0.244178	0.755822	mus
Olfr398	10090.ENSMUSP00000059548	OL	0	0	0	0	NOG69904	olfactory receptor 398	-	-	-	-	5	5	1	0.24969	0.24969	0.75031	mus
Olfr399	10090.ENSMUSP00000056508	OL	270	1	2711963	0.9938	NOG145719	olfactory receptor 399	-	-	-	-	11	10	1.1	0.35246	0.336057	0.663943	mus
Olfr401	10090.ENSMUSP00000078756	OL	0	0	0	0	NOG46142	olfactory receptor 401	-	-	-	-	56	20	2.8	0.45783	0.273606	0.726394	mus
Olfr402	10090.ENSMUSP00000073356	OL	270	1	2711963	0.9938	NOG46142	olfactory receptor 402	-	-	-	-	56	20	2.8	0.45783	0.273606	0.726394	mus
Olfr403	10090.ENSMUSP00000075971	OL	270	1	2711963	0.9938	NOG150319	olfactory receptor 403	-	-	-	-	43	17	2.52941	0.39286	0.247018	0.752982	mus
Olfr410	10090.ENSMUSP00000079235	OL	270	1	2711963	0.9938	NOG46142	olfactory receptor 410	-	-	-	-	56	20	2.8	0.45783	0.273606	0.726394	mus
Olfr411	10090.ENSMUSP00000050456	OL	0	0	0	0	NOG46142	olfactory receptor 411	-	-	-	-	56	20	2.8	0.45783	0.273606	0.726394	mus
Olfr412	10090.ENSMUSP00000076967	OL	270	1	2711963	0.9938	NOG41734	olfactory receptor 412	-	-	-	-	16	10	1.6	0.34442	0.272288	0.727712	mus
Olfr414	10090.ENSMUSP00000052426	OL	270	1	2711963	0.9938	NOG40033	olfactory receptor 414	-	-	-	-	14	11	1.27273	0.36334	0.322066	0.677934	mus
Olfr417	10090.ENSMUSP00000083024	OL	0	0	0	0	NOG44200	olfactory receptor 417	-	-	-	-	20	15	1.33333	0.411	0.355937	0.644063	mus
Olfr419	10090.ENSMUSP00000050893	OL	0	0	0	0	NOG78381	olfactory receptor 419	-	-	-	-	12	12	1	0.38551	0.38551	0.61449	mus
Olfr420	10090.ENSMUSP00000069662	OL	270	1	2711963	0.9938	NOG86364	olfactory receptor 420	-	-	-	-	11	10	1.1	0.35246	0.336057	0.663943	mus
Olfr944	10090.ENSMUSP00000078595	OL	0	0	0	0	-	-	-	-	-	-	-	-	-	-	-	-	mus
Olfr424	10090.ENSMUSP00000054305	OL	0	0	0	0	NOG124413	olfactory receptor 424	-	-	-	-	21	14	1.5	0.39678	0.32397	0.67603	mus
Olfr951	10090.ENSMUSP00000077615	OL	0	0	0	0	NOG47818	olfactory receptor 951	-	-	-	-	32	8	4	0.30624	0.15312	0.84688	mus
Olfr658	10090.ENSMUSP00000086711	OL	270	1	2711963	0.9938	NOG44192	olfactory receptor 658	-	-	-	-	46	20	2.3	0.43469	0.286626	0.713374	mus
Olfr429	10090.ENSMUSP00000051323	OL	270	1	2711963	0.9938	NOG45732	olfactory receptor 429	-	-	-	-	25	19	1.31579	0.44776	0.390348	0.609652	mus
Olfr43	10090.ENSMUSP00000077966	OL	270	1	2711963	0.9938	NOG150319	olfactory receptor 43	-	-	-	-	43	17	2.52941	0.39286	0.247018	0.752982	mus
Olfr432	10090.ENSMUSP00000060341	OL	0	0	0	0	NOG39021	olfactory receptor 432	-	-	-	-	28	17	1.64706	0.41281	0.321659	0.678341	mus
Olfr433	10090.ENSMUSP00000056772	OL	0	0	0	0	NOG39021	olfactory receptor 433	-	-	-	-	28	17	1.64706	0.41281	0.321659	0.678341	mus
Olfr434	10090.ENSMUSP00000076039	OL	0	0	0	0	NOG45258	olfactory receptor 434	-	-	-	-	30	12	2.5	0.34838	0.220335	0.779665	mus
Olfr435	10090.ENSMUSP00000058912	OL	0	0	0	0	NOG45258	olfactory receptor 435	-	-	-	-	30	12	2.5	0.34838	0.220335	0.779665	mus
Olfr437	10090.ENSMUSP00000058147	OL	0	0	0	0	NOG148596	olfactory receptor 437	-	-	-	-	9	5	1.8	0.23627	0.176105	0.823895	mus
Olfr44	10090.ENSMUSP00000076935	OL	0	0	0	0	NOG124373	olfactory receptor 44	-	-	-	-	97	20	4.85	0.3752	0.17037	0.82963	mus
Olfr441	10090.ENSMUSP00000093648	OL	0	0	0	0	NOG45258	olfactory receptor 441	-	-	-	-	30	12	2.5	0.34838	0.220335	0.779665	mus
Olfr444	10090.ENSMUSP00000093649	OL	0	0	0	0	NOG45258	olfactory receptor 444	-	-	-	-	30	12	2.5	0.34838	0.220335	0.779665	mus
Olfr446	10090.ENSMUSP00000099005	OL	0	0	0	0	NOG149322	olfactory receptor 446	-	-	-	-	3	3	1	0.17044	0.17044	0.82956	mus
Olfr447	10090.ENSMUSP00000052312	OL	0	0	0	0	NOG120592	olfactory receptor 447	-	-	-	-	14	10	1.4	0.34798	0.294097	0.705903	mus
Olfr448	10090.ENSMUSP00000059195	OL	0	0	0	0	NOG45258	olfactory receptor 448	-	-	-	-	30	12	2.5	0.34838	0.220335	0.779665	mus
Olfr449	10090.ENSMUSP00000059233	OL	270	1	2711963	0.9938	NOG48149	olfactory receptor 449	-	-	-	-	50	21	2.38095	0.44725	0.289851	0.710149	mus
Olfr45	10090.ENSMUSP00000081492	OL	0	0	0	0	NOG45616	olfactory receptor 45	-	-	-	-	52	16	3.25	0.3444	0.191039	0.808961	mus
Olfr450	10090.ENSMUSP00000068823	OL	0	0	0	0	NOG79840	olfactory receptor 450	-	-	-	-	39	17	2.29412	0.40463	0.267147	0.732853	mus
Olfr452	10090.ENSMUSP00000074914	OL	0	0	0	0	NOG79840	olfactory receptor 452	-	-	-	-	39	17	2.29412	0.40463	0.267147	0.732853	mus
Olfr453	10090.ENSMUSP00000052043	OL	270	1	2711963	0.9938	NOG79840	olfactory receptor 453	-	-	-	-	39	17	2.29412	0.40463	0.267147	0.732853	mus
Olfr456	10090.ENSMUSP00000060839	OL	0	0	0	0	NOG149734	olfactory receptor 456	-	-	-	-	9	5	1.8	0.22725	0.169382	0.830618	mus
Olfr457	10090.ENSMUSP00000087616	OL	0	0	0	0	NOG149734	olfactory receptor 457	-	-	-	-	9	5	1.8	0.22725	0.169382	0.830618	mus
Olfr458	10090.ENSMUSP00000087617	OL	0	0	0	0	NOG149734	olfactory receptor 458	-	-	-	-	9	5	1.8	0.22725	0.169382	0.830618	mus
Olfr459	10090.ENSMUSP00000061622	OL	0	0	0	0	NOG119442	olfactory receptor 459	-	-	-	-	27	13	2.07692	0.36804	0.255379	0.744621	mus
Olfr46	10090.ENSMUSP00000072445	OL	0	0	0	0	NOG45616	olfactory receptor 46	-	-	-	-	52	16	3.25	0.3444	0.191039	0.808961	mus
Olfr460	10090.ENSMUSP00000054887	OL	0	0	0	0	NOG119442	olfactory receptor 460	-	-	-	-	27	13	2.07692	0.36804	0.255379	0.744621	mus
Olfr461	10090.ENSMUSP00000086917	OL	0	0	0	0	NOG119442	olfactory receptor 461	-	-	-	-	27	13	2.07692	0.36804	0.255379	0.744621	mus
Olfr462	10090.ENSMUSP00000055334	OL	270	1	2711963	0.9938	NOG42916	olfactory receptor 462	-	-	-	-	54	20	2.7	0.43423	0.264264	0.735736	mus
Olfr463	10090.ENSMUSP00000080146	OL	270	1	2711963	0.9938	NOG42916	olfactory receptor 463	-	-	-	-	54	20	2.7	0.43423	0.264264	0.735736	mus
Olfr464	10090.ENSMUSP00000074415	OL	0	0	0	0	NOG42916	olfactory receptor 464	-	-	-	-	54	20	2.7	0.43423	0.264264	0.735736	mus
Olfr466	10090.ENSMUSP00000062692	OL	0	0	0	0	NOG39077	olfactory receptor 466	-	-	-	-	58	7	8.28571	0.25224	0.0876292	0.912371	mus
Olfr467	10090.ENSMUSP00000081811	OL	0	0	0	0	NOG41250	olfactory receptor 467	-	-	-	-	59	19	3.10526	0.39891	0.226374	0.773626	mus
Olfr469	10090.ENSMUSP00000075122	OL	0	0	0	0	NOG42406	olfactory receptor 469; Potential odorant receptor	-	-	-	-	112	21	5.33333	0.37779	0.163588	0.836412	mus
Olfr47	10090.ENSMUSP00000077204	OL	0	0	0	0	NOG45258	olfactory receptor 47	-	-	-	-	30	12	2.5	0.34838	0.220335	0.779665	mus
Olfr470	10090.ENSMUSP00000081812	OL	0	0	0	0	NOG42406	olfactory receptor 470; Potential odorant receptor	-	-	-	-	112	21	5.33333	0.37779	0.163588	0.836412	mus
Olfr471	10090.ENSMUSP00000081813	OL	0	0	0	0	NOG41250	olfactory receptor 471	-	-	-	-	59	19	3.10526	0.39891	0.226374	0.773626	mus
Olfr472	10090.ENSMUSP00000081815	OL	0	0	0	0	NOG41250	olfactory receptor 472; Potential odorant receptor	-	-	-	-	59	19	3.10526	0.39891	0.226374	0.773626	mus
Olfr473	10090.ENSMUSP00000081816	OL	0	0	0	0	NOG41250	olfactory receptor 473; Potential odorant receptor	-	-	-	-	59	19	3.10526	0.39891	0.226374	0.773626	mus
Olfr474	10090.ENSMUSP00000055931	OL	0	0	0	0	NOG41250	olfactory receptor 474; Potential odorant receptor	-	-	-	-	59	19	3.10526	0.39891	0.226374	0.773626	mus
Olfr476	10090.ENSMUSP00000076485	OL	0	0	0	0	NOG41250	olfactory receptor 476; Potential odorant receptor	-	-	-	-	59	19	3.10526	0.39891	0.226374	0.773626	mus
Olfr477	10090.ENSMUSP00000091654	OL	0	0	0	0	NOG41250	olfactory receptor 477; Potential odorant receptor	-	-	-	-	59	19	3.10526	0.39891	0.226374	0.773626	mus
Olfr478	10090.ENSMUSP00000058931	OL	0	0	0	0	NOG42406	olfactory receptor 478; Potential odorant receptor	-	-	-	-	112	21	5.33333	0.37779	0.163588	0.836412	mus
Olfr479	10090.ENSMUSP00000056631	OL	0	0	0	0	NOG41862	olfactory receptor 479	-	-	-	-	28	17	1.64706	0.42479	0.330994	0.669006	mus
Olfr48	10090.ENSMUSP00000097350	OL	0	0	0	0	NOG148489	olfactory receptor 48	-	-	-	-	26	16	1.625	0.41135	0.322689	0.677311	mus
Olfr480	10090.ENSMUSP00000071583	OL	270	1	2711963	0.9938	NOG41250	olfactory receptor 480; Probable odorant receptor, which recognizes only aliphatic alcohols, [...]	-	-	-	-	59	19	3.10526	0.39891	0.226374	0.773626	mus
Olfr481	10090.ENSMUSP00000063555	OL	0	0	0	0	NOG147470	olfactory receptor 481; Potential odorant receptor	-	-	-	-	3	3	1	0.17044	0.17044	0.82956	mus
Olfr482	10090.ENSMUSP00000079948	OL	0	0	0	0	NOG42406	olfactory receptor 482; Potential odorant receptor	-	-	-	-	112	21	5.33333	0.37779	0.163588	0.836412	mus
Olfr1342	10090.ENSMUSP00000053925	OL	0	0	0	0	NOG148378	olfactory receptor 1342	-	-	-	-	6	6	1	0.27798	0.27798	0.72202	mus
Olfr484	10090.ENSMUSP00000073267	OL	0	0	0	0	NOG42406	olfactory receptor 484; Potential odorant receptor	-	-	-	-	112	21	5.33333	0.37779	0.163588	0.836412	mus
Olfr1188	10090.ENSMUSP00000088202	OL	0	0	0	0	NOG123243	olfactory receptor 1188	-	-	-	-	13	9	1.44444	0.32551	0.270841	0.729159	mus
Olfr486	10090.ENSMUSP00000071918	OL	0	0	0	0	NOG42406	olfactory receptor 486; Potential odorant receptor	-	-	-	-	112	21	5.33333	0.37779	0.163588	0.836412	mus
Olfr487	10090.ENSMUSP00000080657	OL	0	0	0	0	NOG42406	olfactory receptor 487	-	-	-	-	112	21	5.33333	0.37779	0.163588	0.836412	mus
Olfr488	10090.ENSMUSP00000072735	OL	0	0	0	0	NOG42406	olfactory receptor 488; Potential odorant receptor	-	-	-	-	112	21	5.33333	0.37779	0.163588	0.836412	mus
Olfr49	10090.ENSMUSP00000054361	OL	0	0	0	0	NOG83193	olfactory receptor 49	-	-	-	-	13	6	2.16667	0.2303	0.156458	0.843542	mus
Olfr490	10090.ENSMUSP00000074137	OL	0	0	0	0	NOG42406	olfactory receptor 490; Potential odorant receptor	-	-	-	-	112	21	5.33333	0.37779	0.163588	0.836412	mus
Olfr491	10090.ENSMUSP00000061188	OL	270	1	2711963	0.9938	NOG41250	olfactory receptor 491; Potential odorant receptor	-	-	-	-	59	19	3.10526	0.39891	0.226374	0.773626	mus
Olfr669	10090.ENSMUSP00000095767	OL	270	1	2711963	0.9938	NOG68125	olfactory receptor 669	-	-	-	-	4	4	1	0.21507	0.21507	0.78493	mus
Olfr493	10090.ENSMUSP00000079005	OL	0	0	0	0	NOG42406	olfactory receptor 493; Potential odorant receptor	-	-	-	-	112	21	5.33333	0.37779	0.163588	0.836412	mus
Olfr494	10090.ENSMUSP00000072810	OL	0	0	0	0	NOG42406	olfactory receptor 494; Potential odorant receptor	-	-	-	-	112	21	5.33333	0.37779	0.163588	0.836412	mus
Olfr495	10090.ENSMUSP00000071440	OL	0	0	0	0	NOG42406	olfactory receptor 495; Potential odorant receptor	-	-	-	-	112	21	5.33333	0.37779	0.163588	0.836412	mus
Olfr497	10090.ENSMUSP00000075741	OL	0	0	0	0	NOG42406	olfactory receptor 497; Potential odorant receptor	-	-	-	-	112	21	5.33333	0.37779	0.163588	0.836412	mus
Olfr498	10090.ENSMUSP00000074343	OL	0	0	0	0	NOG42406	olfactory receptor 498; Potential odorant receptor	-	-	-	-	112	21	5.33333	0.37779	0.163588	0.836412	mus
Olfr5	10090.ENSMUSP00000083499	OL	0	0	0	0	-	-	-	-	-	-	-	-	-	-	-	NA	mus
Olfr50	10090.ENSMUSP00000071985	OL	0	0	0	0	NOG46978	olfactory receptor 50	-	-	-	-	61	18	3.38889	0.39436	0.214222	0.785778	mus
Olfr502	10090.ENSMUSP00000077963	OL	270	1	2711963	0.9938	NOG42406	olfactory receptor 502; Potential odorant receptor	-	-	-	-	112	21	5.33333	0.37779	0.163588	0.836412	mus
Olfr503	10090.ENSMUSP00000077296	OL	0	0	0	0	NOG44192	olfactory receptor 503	-	-	-	-	46	20	2.3	0.43469	0.286626	0.713374	mus
Olfr504	10090.ENSMUSP00000075025	OL	0	0	0	0	NOG40164	olfactory receptor 504	-	-	-	-	22	12	1.83333	0.35117	0.259356	0.740644	mus
Olfr506	10090.ENSMUSP00000076566	OL	0	0	0	0	NOG42406	olfactory receptor 506	-	-	-	-	112	21	5.33333	0.37779	0.163588	0.836412	mus
Olfr507	10090.ENSMUSP00000078926	OL	0	0	0	0	NOG42406	olfactory receptor 507; Potential odorant receptor	-	-	-	-	112	21	5.33333	0.37779	0.163588	0.836412	mus
Olfr508	10090.ENSMUSP00000072686	OL	270	1	2711963	0.9938	NOG41250	olfactory receptor 508; Potential odorant receptor	-	-	-	-	59	19	3.10526	0.39891	0.226374	0.773626	mus
Olfr509	10090.ENSMUSP00000053819	OL	0	0	0	0	NOG41862	olfactory receptor 509	-	-	-	-	28	17	1.64706	0.42479	0.330994	0.669006	mus
Olfr51	10090.ENSMUSP00000075832	OL	0	0	0	0	NOG147674	olfactory receptor 51	-	-	-	-	15	10	1.5	0.34303	0.280083	0.719917	mus
Olfr510	10090.ENSMUSP00000075637	OL	0	0	0	0	NOG42406	olfactory receptor 510; Potential odorant receptor	-	-	-	-	112	21	5.33333	0.37779	0.163588	0.836412	mus
Olfr512	10090.ENSMUSP00000074291	OL	0	0	0	0	NOG150795	olfactory receptor 512	-	-	-	-	47	19	2.47368	0.41471	0.263677	0.736323	mus
Olfr513	10090.ENSMUSP00000050578	OL	0	0	0	0	NOG85922	olfactory receptor 513	-	-	-	-	12	12	1	0.38551	0.38551	0.61449	mus
Olfr514	10090.ENSMUSP00000081807	OL	0	0	0	0	NOG150795	olfactory receptor 514	-	-	-	-	47	19	2.47368	0.41471	0.263677	0.736323	mus
Olfr516	10090.ENSMUSP00000071358	OL	270	1	2711963	0.9938	NOG150795	olfactory receptor 516	-	-	-	-	47	19	2.47368	0.41471	0.263677	0.736323	mus
Olfr517	10090.ENSMUSP00000081805	OL	0	0	0	0	NOG150795	olfactory receptor 517	-	-	-	-	47	19	2.47368	0.41471	0.263677	0.736323	mus
Olfr518	10090.ENSMUSP00000050503	OL	270	1	2711963	0.9938	NOG150795	olfactory receptor 518	-	-	-	-	47	19	2.47368	0.41471	0.263677	0.736323	mus
Olfr519	10090.ENSMUSP00000081804	OL	0	0	0	0	NOG150795	olfactory receptor 519	-	-	-	-	47	19	2.47368	0.41471	0.263677	0.736323	mus
Olfr52	10090.ENSMUSP00000097489	OL	0	0	0	0	NOG43965	olfactory receptor 52	-	-	-	-	33	18	1.83333	0.42395	0.313108	0.686892	mus
Olfr520	10090.ENSMUSP00000095864	OL	0	0	0	0	NOG87248	olfactory receptor 520	-	-	-	-	22	11	2	0.34699	0.245359	0.754641	mus
Olfr521	10090.ENSMUSP00000095863	OL	0	0	0	0	NOG87248	olfactory receptor 521	-	-	-	-	22	11	2	0.34699	0.245359	0.754641	mus
Olfr522	10090.ENSMUSP00000057288	OL	0	0	0	0	NOG48149	olfactory receptor 522	-	-	-	-	50	21	2.38095	0.44725	0.289851	0.710149	mus
Olfr523	10090.ENSMUSP00000052678	OL	0	0	0	0	NOG146470	olfactory receptor 523	-	-	-	-	20	14	1.42857	0.39618	0.331468	0.668532	mus
Olfr524	10090.ENSMUSP00000053565	OL	0	0	0	0	NOG147084	olfactory receptor 524	-	-	-	-	4	4	1	0.21507	0.21507	0.78493	mus
Olfr525	10090.ENSMUSP00000077243	OL	0	0	0	0	NOG71986	olfactory receptor 525	-	-	-	-	13	5	2.6	0.22948	0.142317	0.857683	mus
Olfr527	10090.ENSMUSP00000072405	OL	0	0	0	0	NOG83434	olfactory receptor 527	-	-	-	-	23	13	1.76923	0.373	0.280425	0.719575	mus
Olfr53	10090.ENSMUSP00000081493	OL	0	0	0	0	NOG45616	olfactory receptor 53	-	-	-	-	52	16	3.25	0.3444	0.191039	0.808961	mus
Olfr530	10090.ENSMUSP00000073808	OL	0	0	0	0	-	-	-	-	-	-	-	-	-	-	-	NA	mus
Olfr531	10090.ENSMUSP00000079048	OL	0	0	0	0	NOG83434	olfactory receptor 531	-	-	-	-	23	13	1.76923	0.373	0.280425	0.719575	mus
Olfr532	10090.ENSMUSP00000072959	OL	0	0	0	0	NOG71986	olfactory receptor 532	-	-	-	-	13	5	2.6	0.22948	0.142317	0.857683	mus
Olfr533	10090.ENSMUSP00000071667	OL	0	0	0	0	NOG45616	olfactory receptor 533	-	-	-	-	52	16	3.25	0.3444	0.191039	0.808961	mus
Olfr535	10090.ENSMUSP00000074435	OL	0	0	0	0	NOG45616	olfactory receptor 535	-	-	-	-	52	16	3.25	0.3444	0.191039	0.808961	mus
Olfr536	10090.ENSMUSP00000067699	OL	0	0	0	0	-	-	-	-	-	-	-	-	-	-	-	NA	mus
Olfr538	10090.ENSMUSP00000081495	OL	0	0	0	0	NOG45616	olfactory receptor 538	-	-	-	-	52	16	3.25	0.3444	0.191039	0.808961	mus
Olfr539	10090.ENSMUSP00000077990	OL	0	0	0	0	NOG45616	olfactory receptor 539	-	-	-	-	52	16	3.25	0.3444	0.191039	0.808961	mus
Olfr54	10090.ENSMUSP00000072016	OL	0	0	0	0	NOG149787	olfactory receptor 54	-	-	-	-	3	2	1.5	0.09875	0.080629	0.919371	mus
Olfr541	10090.ENSMUSP00000079508	OL	0	0	0	0	NOG45616	olfactory receptor 541	-	-	-	-	52	16	3.25	0.3444	0.191039	0.808961	mus
Olfr543	10090.ENSMUSP00000051348	OL	270	1	2711963	0.9938	NOG68614	olfactory receptor 543	-	-	-	-	5	4	1.25	0.20668	0.18486	0.81514	mus
Olfr544	10090.ENSMUSP00000051280	OL	270	1	2711963	0.9938	NOG42004	olfactory receptor 544	-	-	-	-	5	4	1.25	0.20668	0.18486	0.81514	mus
Olfr545	10090.ENSMUSP00000052396	OL	270	1	2711963	0.9938	NOG42004	olfactory receptor 545	-	-	-	-	5	4	1.25	0.20668	0.18486	0.81514	mus
Olfr547	10090.ENSMUSP00000095831	OL	0	0	0	0	NOG44020	olfactory receptor 547	-	-	-	-	50	19	2.63158	0.43263	0.266691	0.733309	mus
Olfr549	10090.ENSMUSP00000095829	OL	0	0	0	0	NOG147425	olfactory receptor 549	-	-	-	-	4	4	1	0.21507	0.21507	0.78493	mus
Olfr1402	10090.ENSMUSP00000057416	OL	0	0	0	0	NOG147928	olfactory receptor 1402	-	-	-	-	50	17	2.94118	0.40283	0.234888	0.765112	mus
Olfr550	10090.ENSMUSP00000095828	OL	0	0	0	0	NOG82058	olfactory receptor 550	-	-	-	-	4	4	1	0.21507	0.21507	0.78493	mus
Olfr551	10090.ENSMUSP00000095827	OL	0	0	0	0	NOG41113	olfactory receptor 551	-	-	-	-	19	17	1.11765	0.42989	0.406635	0.593365	mus
Olfr552	10090.ENSMUSP00000095826	OL	270	1	2711963	0.9938	NOG47490	olfactory receptor 552	-	-	-	-	28	18	1.55556	0.42629	0.341792	0.658208	mus
Olfr553	10090.ENSMUSP00000095825	OL	0	0	0	0	NOG81318	olfactory receptor 553	-	-	-	-	22	16	1.375	0.4172	0.355789	0.644211	mus
Olfr554	10090.ENSMUSP00000095824	OL	270	1	2711963	0.9938	NOG81318	olfactory receptor 554	-	-	-	-	22	16	1.375	0.4172	0.355789	0.644211	mus
Olfr555	10090.ENSMUSP00000095823	OL	270	1	2711963	0.9938	NOG44901	olfactory receptor 555	-	-	-	-	16	14	1.14286	0.40326	0.377215	0.622785	mus
Olfr556	10090.ENSMUSP00000095822	OL	270	1	2711963	0.9938	NOG124898	olfactory receptor 556	-	-	-	-	19	12	1.58333	0.35714	0.283826	0.716174	mus
Olfr557	10090.ENSMUSP00000095821	OL	270	1	2711963	0.9938	NOG85407	olfactory receptor 557	-	-	-	-	12	12	1	0.38551	0.38551	0.61449	mus
Olfr558	10090.ENSMUSP00000091674	OL	270	1	2711963	0.9938	NOG145581	olfactory receptor 558	-	-	-	-	14	14	1	0.40943	0.40943	0.59057	mus
Olfr559	10090.ENSMUSP00000095820	OL	0	0	0	0	NOG122777	olfactory receptor 559	-	-	-	-	14	7	2	0.2845	0.201172	0.798828	mus
Olfr366	10090.ENSMUSP00000088524	OL	0	0	0	0	NOG148689	olfactory receptor 366	-	-	-	-	17	11	1.54545	0.34081	0.274148	0.725852	mus
Olfr954	10090.ENSMUSP00000079205	OL	0	0	0	0	NOG47818	olfactory receptor 954	-	-	-	-	32	8	4	0.30624	0.15312	0.84688	mus
Olfr561	10090.ENSMUSP00000095819	OL	0	0	0	0	NOG77492	olfactory receptor 561	-	-	-	-	15	13	1.15385	0.38604	0.359383	0.640617	mus
Olfr566	10090.ENSMUSP00000071344	OL	0	0	0	0	NOG42966	olfactory receptor 566	-	-	-	-	22	14	1.57143	0.39765	0.317215	0.682785	mus
Olfr568	10090.ENSMUSP00000095818	OL	270	1	2711963	0.9938	NOG76064	olfactory receptor 568	-	-	-	-	10	9	1.11111	0.33572	0.318492	0.681508	mus
Olfr569	10090.ENSMUSP00000077321	OL	270	1	2711963	0.9938	NOG41309	olfactory receptor 569	-	-	-	-	23	13	1.76923	0.37882	0.284801	0.715199	mus
Olfr57	10090.ENSMUSP00000080872	OL	0	0	0	0	NOG147368	olfactory receptor 57	-	-	-	-	41	13	3.15385	0.36135	0.203473	0.796527	mus
Olfr570	10090.ENSMUSP00000095817	OL	0	0	0	0	NOG145059	olfactory receptor 570	-	-	-	-	7	4	1.75	0.17899	0.135304	0.864696	mus
Olfr571	10090.ENSMUSP00000062385	OL	270	1	2711963	0.9938	NOG40020	olfactory receptor 571	-	-	-	-	13	13	1	0.39793	0.39793	0.60207	mus
Olfr572	10090.ENSMUSP00000095816	OL	0	0	0	0	NOG124730	olfactory receptor 572	-	-	-	-	10	7	1.42857	0.2712	0.226902	0.773098	mus
Olfr574	10090.ENSMUSP00000095815	OL	270	1	2711963	0.9938	NOG133886	olfactory receptor 574	-	-	-	-	17	14	1.21429	0.4016	0.364445	0.635555	mus
Olfr575	10090.ENSMUSP00000081873	OL	0	0	0	0	NOG147285	olfactory receptor 575	-	-	-	-	17	16	1.0625	0.4269	0.414154	0.585846	mus
Olfr576	10090.ENSMUSP00000095814	OL	270	1	2711963	0.9938	NOG146771	olfactory receptor 576	-	-	-	-	19	14	1.35714	0.39593	0.339865	0.660135	mus
Olfr577	10090.ENSMUSP00000059586	OL	270	1	2711963	0.9938	NOG45255	olfactory receptor 577	-	-	-	-	18	15	1.2	0.41257	0.376623	0.623377	mus
Olfr578	10090.ENSMUSP00000058167	OL	270	1	2711963	0.9938	NOG39219	olfactory receptor 578	-	-	-	-	13	12	1.08333	0.38139	0.366428	0.633572	mus
Olfr58	10090.ENSMUSP00000078603	OL	0	0	0	0	NOG46199	olfactory receptor 58	-	-	-	-	58	12	4.83333	0.34704	0.157854	0.842146	mus
Olfr582	10090.ENSMUSP00000095813	OL	0	0	0	0	NOG41309	olfactory receptor 582	-	-	-	-	23	13	1.76923	0.37882	0.284801	0.715199	mus
Olfr583	10090.ENSMUSP00000095812	OL	0	0	0	0	NOG42966	olfactory receptor 583	-	-	-	-	22	14	1.57143	0.39765	0.317215	0.682785	mus
Olfr584	10090.ENSMUSP00000095811	OL	270	1	2711963	0.9938	NOG41309	olfactory receptor 584	-	-	-	-	23	13	1.76923	0.37882	0.284801	0.715199	mus
Olfr1285	10090.ENSMUSP00000073594	OL	0	0	0	0	NOG71345	olfactory receptor 1285	-	-	-	-	45	15	3	0.36933	0.213233	0.786767	mus
Olfr586	10090.ENSMUSP00000081872	OL	0	0	0	0	NOG68728	olfactory receptor 586	-	-	-	-	25	11	2.27273	0.30128	0.199846	0.800154	mus
Olfr589	10090.ENSMUSP00000060166	OL	270	1	2711963	0.9938	NOG74131	olfactory receptor 589	-	-	-	-	23	11	2.09091	0.34448	0.23823	0.76177	mus
Olfr59	10090.ENSMUSP00000079351	OL	0	0	0	0	NOG149705	olfactory receptor 59	-	-	-	-	23	17	1.35294	0.43034	0.369975	0.630025	mus
Olfr591	10090.ENSMUSP00000073884	OL	0	0	0	0	NOG151040	olfactory receptor 591	-	-	-	-	12	9	1.33333	0.33174	0.287296	0.712704	mus
Olfr592	10090.ENSMUSP00000095808	OL	0	0	0	0	NOG119554	olfactory receptor 592	-	-	-	-	26	14	1.85714	0.37988	0.278756	0.721244	mus
Olfr593	10090.ENSMUSP00000095807	OL	0	0	0	0	NOG71951	olfactory receptor 593	-	-	-	-	19	8	2.375	0.29143	0.189105	0.810895	mus
Olfr594	10090.ENSMUSP00000095806	OL	270	1	2711963	0.9938	NOG74131	olfactory receptor 594	-	-	-	-	23	11	2.09091	0.34448	0.23823	0.76177	mus
Olfr597	10090.ENSMUSP00000095804	OL	0	0	0	0	NOG119625	olfactory receptor 598	-	-	-	-	5	4	1.25	0.20668	0.18486	0.81514	mus
Olfr1252	10090.ENSMUSP00000097354	OL	0	0	0	0	-	-	-	-	-	-	-	-	-	-	-	-	mus
Olfr599	10090.ENSMUSP00000095803	OL	0	0	0	0	NOG114286	olfactory receptor 599	-	-	-	-	8	6	1.33333	0.26884	0.232823	0.767177	mus
Olfr6	10090.ENSMUSP00000048740	OL	0	0	0	0	NOG48149	olfactory receptor 6; Odorant receptor (Potential)	-	-	-	-	50	21	2.38095	0.44725	0.289851	0.710149	mus
Olfr60	10090.ENSMUSP00000074916	OL	0	0	0	0	NOG45616	olfactory receptor 60	-	-	-	-	52	16	3.25	0.3444	0.191039	0.808961	mus
Olfr600	10090.ENSMUSP00000053887	OL	0	0	0	0	NOG84613	olfactory receptor 600	-	-	-	-	10	8	1.25	0.31421	0.281038	0.718962	mus
Olfr601	10090.ENSMUSP00000079328	OL	0	0	0	0	NOG83727	olfactory receptor 601	-	-	-	-	10	7	1.42857	0.29271	0.244899	0.755101	mus
Olfr603	10090.ENSMUSP00000071744	OL	0	0	0	0	NOG149268	olfactory receptor 604	-	-	-	-	11	9	1.22222	0.33291	0.301129	0.698871	mus
Olfr605	10090.ENSMUSP00000079489	OL	0	0	0	0	NOG83727	olfactory receptor 605	-	-	-	-	10	7	1.42857	0.29271	0.244899	0.755101	mus
Olfr606	10090.ENSMUSP00000095802	OL	0	0	0	0	NOG71954	olfactory receptor 606	-	-	-	-	15	10	1.5	0.34844	0.2845	0.7155	mus
Olfr607	10090.ENSMUSP00000041119	OL	0	0	0	0	NOG85168	olfactory receptor 607	-	-	-	-	6	5	1.2	0.24213	0.221033	0.778967	mus
Olfr608	10090.ENSMUSP00000095801	OL	0	0	0	0	NOG125273	olfactory receptor 608	-	-	-	-	19	8	2.375	0.29256	0.189838	0.810162	mus
Olfr609	10090.ENSMUSP00000051749	OL	0	0	0	0	NOG45255	olfactory receptor 609	-	-	-	-	18	15	1.2	0.41257	0.376623	0.623377	mus
Olfr61	10090.ENSMUSP00000081494	OL	0	0	0	0	NOG45616	olfactory receptor 61	-	-	-	-	52	16	3.25	0.3444	0.191039	0.808961	mus
Olfr610	10090.ENSMUSP00000052577	OL	0	0	0	0	NOG77906	olfactory receptor 610	-	-	-	-	6	5	1.2	0.24213	0.221033	0.778967	mus
Olfr611	10090.ENSMUSP00000077246	OL	0	0	0	0	NOG70811	olfactory receptor 611	-	-	-	-	11	7	1.57143	0.28643	0.228492	0.771508	mus
Olfr612	10090.ENSMUSP00000081869	OL	0	0	0	0	NOG70811	olfactory receptor 612	-	-	-	-	11	7	1.57143	0.28643	0.228492	0.771508	mus
Olfr1351	10090.ENSMUSP00000079555	OL	0	0	0	0	NOG150292	olfactory receptor 1351	-	-	-	-	111	21	5.28571	0.44183	0.192178	0.807822	mus
Olfr68	10090.ENSMUSP00000072329	OL	270	1	2711963	0.9938	NOG86443	olfactory receptor 68	-	-	-	-	95	21	4.52381	0.43317	0.20366	0.79634	mus
Olfr616	10090.ENSMUSP00000056570	OL	0	0	0	0	NOG147123	olfactory receptor 616	-	-	-	-	10	8	1.25	0.30609	0.273775	0.726225	mus
Olfr617	10090.ENSMUSP00000040319	OL	0	0	0	0	NOG69010	olfactory receptor 617	-	-	-	-	31	17	1.82353	0.41651	0.308439	0.691561	mus
Olfr618	10090.ENSMUSP00000095799	OL	0	0	0	0	NOG151040	olfactory receptor 618	-	-	-	-	12	9	1.33333	0.33174	0.287296	0.712704	mus
Olfr619	10090.ENSMUSP00000095798	OL	0	0	0	0	NOG69010	olfactory receptor 619	-	-	-	-	31	17	1.82353	0.41651	0.308439	0.691561	mus
Olfr62	10090.ENSMUSP00000099727	OL	0	0	0	0	NOG146150	olfactory receptor 62	-	-	-	-	9	7	1.28571	0.28407	0.250527	0.749473	mus
Olfr620	10090.ENSMUSP00000061764	OL	0	0	0	0	NOG148145	olfactory receptor 620	-	-	-	-	55	21	2.61905	0.44423	0.274496	0.725504	mus
Olfr622	10090.ENSMUSP00000058312	OL	0	0	0	0	NOG125273	olfactory receptor 622	-	-	-	-	19	8	2.375	0.29256	0.189838	0.810162	mus
Olfr623	10090.ENSMUSP00000070658	OL	0	0	0	0	NOG42936	olfactory receptor 623	-	-	-	-	52	19	2.73684	0.43289	0.261669	0.738331	mus
Olfr624	10090.ENSMUSP00000049938	OL	270	1	2711963	0.9938	NOG148145	olfactory receptor 624	-	-	-	-	55	21	2.61905	0.44423	0.274496	0.725504	mus
Olfr628	10090.ENSMUSP00000095795	OL	0	0	0	0	NOG86443	olfactory receptor 628	-	-	-	-	95	21	4.52381	0.43317	0.20366	0.79634	mus
Olfr629	10090.ENSMUSP00000052662	OL	0	0	0	0	NOG125273	olfactory receptor 629	-	-	-	-	19	8	2.375	0.29256	0.189838	0.810162	mus
Olfr63	10090.ENSMUSP00000067207	OL	270	1	2711963	0.9938	NOG42955	olfactory receptor 63; Odorant receptor (Potential)	-	-	-	-	21	9	2.33333	0.30711	0.201051	0.798949	mus
Olfr630	10090.ENSMUSP00000049569	OL	0	0	0	0	NOG71954	olfactory receptor 630	-	-	-	-	15	10	1.5	0.34844	0.2845	0.7155	mus
Olfr631	10090.ENSMUSP00000059317	OL	270	1	2711963	0.9938	NOG38847	olfactory receptor 631	-	-	-	-	11	11	1	0.37201	0.37201	0.62799	mus
Olfr632	10090.ENSMUSP00000095791	OL	0	0	0	0	NOG128495	olfactory receptor 632	-	-	-	-	5	3	1.66667	0.14743	0.114199	0.885801	mus
Olfr633	10090.ENSMUSP00000095790	OL	0	0	0	0	NOG145556	olfactory receptor 633	-	-	-	-	6	6	1	0.27798	0.27798	0.72202	mus
Olfr635	10090.ENSMUSP00000095788	OL	270	1	2711963	0.9938	NOG46377	olfactory receptor 635	-	-	-	-	25	15	1.66667	0.40686	0.315152	0.684848	mus
Olfr638	10090.ENSMUSP00000095786	OL	270	1	2711963	0.9938	NOG46377	olfactory receptor 638	-	-	-	-	25	15	1.66667	0.40686	0.315152	0.684848	mus
Olfr639	10090.ENSMUSP00000081860	OL	0	0	0	0	NOG75946	olfactory receptor 639	-	-	-	-	5	4	1.25	0.20668	0.18486	0.81514	mus
Olfr64	10090.ENSMUSP00000080444	OL	270	1	2711963	0.9938	NOG42936	olfactory receptor 65	-	-	-	-	52	19	2.73684	0.43289	0.261669	0.738331	mus
Olfr640	10090.ENSMUSP00000081858	OL	270	1	2711963	0.9938	NOG46991	olfactory receptor 640	-	-	-	-	25	16	1.5625	0.40686	0.325488	0.674512	mus
Olfr641	10090.ENSMUSP00000095785	OL	270	1	2711963	0.9938	NOG148345	olfactory receptor 641	-	-	-	-	23	19	1.21053	0.44551	0.40492	0.59508	mus
Olfr642	10090.ENSMUSP00000061462	OL	0	0	0	0	NOG46991	olfactory receptor 642	-	-	-	-	25	16	1.5625	0.40686	0.325488	0.674512	mus
Olfr643	10090.ENSMUSP00000073707	OL	0	0	0	0	NOG46991	olfactory receptor 643	-	-	-	-	25	16	1.5625	0.40686	0.325488	0.674512	mus
Olfr644	10090.ENSMUSP00000076633	OL	0	0	0	0	NOG46991	olfactory receptor 644	-	-	-	-	25	16	1.5625	0.40686	0.325488	0.674512	mus
Olfr645	10090.ENSMUSP00000062821	OL	0	0	0	0	NOG148757	olfactory receptor 645	-	-	-	-	2	2	1	0.10754	0.10754	0.89246	mus
Olfr646	10090.ENSMUSP00000095784	OL	270	1	2711963	0.9938	NOG48158	olfactory receptor 646	-	-	-	-	23	17	1.35294	0.42681	0.36694	0.63306	mus
Olfr648	10090.ENSMUSP00000062529	OL	270	1	2711963	0.9938	NOG86134	olfactory receptor 648	-	-	-	-	48	20	2.4	0.43527	0.280966	0.719034	mus
Olfr649	10090.ENSMUSP00000050903	OL	0	0	0	0	NOG148238	olfactory receptor 649	-	-	-	-	8	5	1.6	0.23181	0.183262	0.816738	mus
Olfr65	10090.ENSMUSP00000058834	OL	270	1	2711963	0.9938	NOG42936	olfactory receptor 64	-	-	-	-	52	19	2.73684	0.43289	0.261669	0.738331	mus
Olfr651	10090.ENSMUSP00000095778	OL	0	0	0	0	NOG86134	olfactory receptor 651	-	-	-	-	48	20	2.4	0.43527	0.280966	0.719034	mus
Olfr652	10090.ENSMUSP00000095777	OL	0	0	0	0	NOG86134	olfactory receptor 652	-	-	-	-	48	20	2.4	0.43527	0.280966	0.719034	mus
Olfr653	10090.ENSMUSP00000095776	OL	0	0	0	0	NOG144964	olfactory receptor 653	-	-	-	-	12	10	1.2	0.3429	0.313023	0.686977	mus
Olfr654	10090.ENSMUSP00000095775	OL	0	0	0	0	NOG129273	olfactory receptor 654	-	-	-	-	9	6	1.5	0.26017	0.212428	0.787572	mus
Olfr655	10090.ENSMUSP00000054108	OL	0	0	0	0	NOG70443	olfactory receptor 655	-	-	-	-	6	6	1	0.27798	0.27798	0.72202	mus
Olfr656	10090.ENSMUSP00000095774	OL	0	0	0	0	NOG133526	olfactory receptor 656	-	-	-	-	6	6	1	0.27798	0.27798	0.72202	mus
Olfr657	10090.ENSMUSP00000095773	OL	270	1	2711963	0.9938	NOG40164	olfactory receptor 657	-	-	-	-	22	12	1.83333	0.35117	0.259356	0.740644	mus
Olfr658	10090.ENSMUSP00000086711	OL	270	1	2711963	0.9938	NOG44192	olfactory receptor 658	-	-	-	-	46	20	2.3	0.43469	0.286626	0.713374	mus
Olfr659	10090.ENSMUSP00000095772	OL	0	0	0	0	NOG44192	olfactory receptor 659	-	-	-	-	46	20	2.3	0.43469	0.286626	0.713374	mus
Olfr66	10090.ENSMUSP00000078119	OL	270	1	2711963	0.9938	NOG42936	olfactory receptor 66	-	-	-	-	52	19	2.73684	0.43289	0.261669	0.738331	mus
Olfr1446	10090.ENSMUSP00000079994	OL	0	0	0	0	-	-	-	-	-	-	-	-	-	-	-	-	mus
Olfr661	10090.ENSMUSP00000095770	OL	0	0	0	0	NOG147616	olfactory receptor 661	-	-	-	-	6	4	1.5	0.19276	0.157388	0.842612	mus
Olfr1248	10090.ENSMUSP00000097358	OL	0	0	0	0	-	-	-	-	-	-	-	-	-	-	-	-	mus
Olfr664	10090.ENSMUSP00000065722	OL	270	1	2711963	0.9938	NOG45467	olfactory receptor 664	-	-	-	-	15	13	1.15385	0.39146	0.364429	0.635571	mus
Olfr665	10090.ENSMUSP00000095768	OL	0	0	0	0	NOG48028	olfactory receptor 665	-	-	-	-	30	19	1.57895	0.43623	0.347161	0.652839	mus
Olfr666	10090.ENSMUSP00000079893	OL	270	1	2711963	0.9938	NOG48028	olfactory receptor 666	-	-	-	-	30	19	1.57895	0.43623	0.347161	0.652839	mus
B3gnt2	10090.ENSMUSP00000060247	OL	0	0	0	0	-	-	KOG2287	UDP-GlcNAc:betaGal beta-1,3-N-acetylglucosaminyltransferase 2; Catalyzes the initiation and [...]	-	-	425	38	11.1842	0.86453	0.25851	0.74149	mus
Olfr1006	10090.ENSMUSP00000097501	OL	0	0	0	0	NOG43438	olfactory receptor 1006	-	-	-	-	23	15	1.53333	0.40458	0.326728	0.673272	mus
Olfr669	10090.ENSMUSP00000095767	OL	270	1	2711963	0.9938	NOG68125	olfactory receptor 669	-	-	-	-	4	4	1	0.21507	0.21507	0.78493	mus
Olfr67	10090.ENSMUSP00000091670	OL	0	0	0	0	NOG69010	olfactory receptor 67	-	-	-	-	31	17	1.82353	0.41651	0.308439	0.691561	mus
Olfr670	10090.ENSMUSP00000060289	OL	0	0	0	0	NOG148222	olfactory receptor 670	-	-	-	-	7	7	1	0.30189	0.30189	0.69811	mus
Olfr671	10090.ENSMUSP00000077774	OL	270	1	2711963	0.9938	NOG79452	olfactory receptor 671	-	-	-	-	25	13	1.92308	0.3843	0.277122	0.722878	mus
Olfr672	10090.ENSMUSP00000054607	OL	0	0	0	0	NOG149343	olfactory receptor 672	-	-	-	-	10	8	1.25	0.31421	0.281038	0.718962	mus
Olfr675	10090.ENSMUSP00000072847	OL	270	1	2711963	0.9938	NOG79452	olfactory receptor 675	-	-	-	-	25	13	1.92308	0.3843	0.277122	0.722878	mus
Olfr676	10090.ENSMUSP00000095765	OL	0	0	0	0	NOG146654	olfactory receptor 676	-	-	-	-	4	4	1	0.21507	0.21507	0.78493	mus
Olfr677	10090.ENSMUSP00000095764	OL	270	1	2711963	0.9938	NOG148093	olfactory receptor 677	-	-	-	-	24	17	1.41176	0.43032	0.362169	0.637831	mus
Olfr678	10090.ENSMUSP00000095763	OL	270	1	2711963	0.9938	NOG41008	olfactory receptor 678	-	-	-	-	22	18	1.22222	0.43676	0.395065	0.604935	mus
Olfr679	10090.ENSMUSP00000095761	OL	0	0	0	0	NOG40290	olfactory receptor 679	-	-	-	-	44	19	2.31579	0.43497	0.285831	0.714169	mus
Olfr68	10090.ENSMUSP00000072329	OL	270	1	2711963	0.9938	NOG86443	olfactory receptor 68	-	-	-	-	95	21	4.52381	0.43317	0.20366	0.79634	mus
Olfr681	10090.ENSMUSP00000095760	OL	0	0	0	0	NOG40290	olfactory receptor 681	-	-	-	-	44	19	2.31579	0.43497	0.285831	0.714169	mus
Olfr683	10090.ENSMUSP00000060527	OL	0	0	0	0	NOG25303	olfactory receptor 683	-	-	-	-	47	20	2.35	0.44314	0.289073	0.710927	mus
Olfr684	10090.ENSMUSP00000055880	OL	270	1	2711963	0.9938	NOG25303	olfactory receptor 684	-	-	-	-	47	20	2.35	0.44314	0.289073	0.710927	mus
Olfr685	10090.ENSMUSP00000061561	OL	270	1	2711963	0.9938	NOG47361	olfactory receptor 685	-	-	-	-	16	13	1.23077	0.38982	0.351379	0.648621	mus
Olfr686	10090.ENSMUSP00000049601	OL	0	0	0	0	NOG82884	olfactory receptor 686	-	-	-	-	5	5	1	0.24969	0.24969	0.75031	mus
Olfr687	10090.ENSMUSP00000095758	OL	270	1	2711963	0.9938	NOG40832	olfactory receptor 687	-	-	-	-	32	13	2.46154	0.35608	0.226957	0.773043	mus
Olfr688	10090.ENSMUSP00000095757	OL	270	1	2711963	0.9938	NOG40832	olfactory receptor 688	-	-	-	-	32	13	2.46154	0.35608	0.226957	0.773043	mus
Olfr689	10090.ENSMUSP00000095756	OL	270	1	2711963	0.9938	NOG40832	olfactory receptor 689	-	-	-	-	32	13	2.46154	0.35608	0.226957	0.773043	mus
Olfr69	10090.ENSMUSP00000079713	OL	270	1	2711963	0.9938	NOG86443	olfactory receptor 69	-	-	-	-	95	21	4.52381	0.43317	0.20366	0.79634	mus
Olfr690	10090.ENSMUSP00000061272	OL	0	0	0	0	NOG150456	olfactory receptor 690	-	-	-	-	5	5	1	0.24969	0.24969	0.75031	mus
Olfr691	10090.ENSMUSP00000061078	OL	0	0	0	0	NOG146850	olfactory receptor 691	-	-	-	-	10	7	1.42857	0.28459	0.238105	0.761895	mus
Olfr692	10090.ENSMUSP00000095755	OL	270	1	2711963	0.9938	NOG44016	olfactory receptor 692	-	-	-	-	12	12	1	0.38551	0.38551	0.61449	mus
Olfr693	10090.ENSMUSP00000059679	OL	0	0	0	0	NOG41022	olfactory receptor 693	-	-	-	-	54	19	2.84211	0.40521	0.240359	0.759641	mus
Olfr694	10090.ENSMUSP00000080740	OL	0	0	0	0	NOG41022	olfactory receptor 694	-	-	-	-	54	19	2.84211	0.40521	0.240359	0.759641	mus
Olfr695	10090.ENSMUSP00000079726	OL	0	0	0	0	NOG41022	olfactory receptor 695	-	-	-	-	54	19	2.84211	0.40521	0.240359	0.759641	mus
Olfr697	10090.ENSMUSP00000055207	OL	0	0	0	0	NOG41022	olfactory receptor 697	-	-	-	-	54	19	2.84211	0.40521	0.240359	0.759641	mus
Olfr698	10090.ENSMUSP00000074509	OL	0	0	0	0	NOG41022	olfactory receptor 698	-	-	-	-	54	19	2.84211	0.40521	0.240359	0.759641	mus
Olfr699	10090.ENSMUSP00000068023	OL	0	0	0	0	NOG41022	olfactory receptor 699	-	-	-	-	54	19	2.84211	0.40521	0.240359	0.759641	mus
Olfr70	10090.ENSMUSP00000060748	OL	0	0	0	0	NOG75110	olfactory receptor 70	-	-	-	-	10	6	1.66667	0.23238	0.180001	0.819999	mus
Olfr700	10090.ENSMUSP00000078855	OL	0	0	0	0	NOG41022	olfactory receptor 700	-	-	-	-	54	19	2.84211	0.40521	0.240359	0.759641	mus
Olfr701	10090.ENSMUSP00000064987	OL	270	1	2711963	0.9938	NOG41022	olfactory receptor 701	-	-	-	-	54	19	2.84211	0.40521	0.240359	0.759641	mus
Olfr702	10090.ENSMUSP00000079704	OL	0	0	0	0	NOG149129	olfactory receptor 702	-	-	-	-	10	6	1.66667	0.26308	0.203781	0.796219	mus
Olfr703	10090.ENSMUSP00000095746	OL	0	0	0	0	NOG41022	olfactory receptor 703	-	-	-	-	54	19	2.84211	0.40521	0.240359	0.759641	mus
Olfr704	10090.ENSMUSP00000095745	OL	0	0	0	0	NOG41022	olfactory receptor 704	-	-	-	-	54	19	2.84211	0.40521	0.240359	0.759641	mus
Olfr705	10090.ENSMUSP00000050694	OL	270	1	2711963	0.9938	NOG41022	olfactory receptor 705	-	-	-	-	54	19	2.84211	0.40521	0.240359	0.759641	mus
Olfr706	10090.ENSMUSP00000057180	OL	270	1	2711963	0.9938	NOG41022	olfactory receptor 706	-	-	-	-	54	19	2.84211	0.40521	0.240359	0.759641	mus
Olfr707	10090.ENSMUSP00000086062	OL	270	1	2711963	0.9938	NOG74246	olfactory receptor 707	-	-	-	-	37	17	2.17647	0.4003	0.271337	0.728663	mus
Olfr71	10090.ENSMUSP00000060230	OL	0	0	0	0	NOG134444	olfactory receptor 71	-	-	-	-	21	16	1.3125	0.40702	0.355276	0.644724	mus
Olfr710	10090.ENSMUSP00000062956	OL	0	0	0	0	NOG149129	olfactory receptor 710	-	-	-	-	10	6	1.66667	0.26308	0.203781	0.796219	mus
Olfr711	10090.ENSMUSP00000055724	OL	270	1	2711963	0.9938	NOG48149	olfactory receptor 711	-	-	-	-	50	21	2.38095	0.44725	0.289851	0.710149	mus
Olfr713	10090.ENSMUSP00000095743	OL	270	1	2711963	0.9938	NOG148577	olfactory receptor 713	-	-	-	-	30	17	1.76471	0.42013	0.316262	0.683738	mus
Olfr714	10090.ENSMUSP00000095742	OL	0	0	0	0	NOG148577	olfactory receptor 714	-	-	-	-	30	17	1.76471	0.42013	0.316262	0.683738	mus
Olfr715	10090.ENSMUSP00000079834	OL	270	1	2711963	0.9938	NOG41948	olfactory receptor 715	-	-	-	-	20	13	1.53846	0.38137	0.30747	0.69253	mus
Olfr716	10090.ENSMUSP00000095740	OL	270	1	2711963	0.9938	NOG74246	olfactory receptor 716	-	-	-	-	37	17	2.17647	0.4003	0.271337	0.728663	mus
Olfr720	10090.ENSMUSP00000046509	OL	0	0	0	0	NOG81984	olfactory receptor 720	-	-	-	-	14	13	1.07692	0.39407	0.379736	0.620264	mus
Olfr722	10090.ENSMUSP00000059721	OL	270	1	2711963	0.9938	NOG43237	olfactory receptor 722	-	-	-	-	32	17	1.88235	0.42672	0.311023	0.688977	mus
Olfr723	10090.ENSMUSP00000073416	OL	270	1	2711963	0.9938	NOG147201	olfactory receptor 723	-	-	-	-	17	16	1.0625	0.4269	0.414154	0.585846	mus
Olfr724	10090.ENSMUSP00000074546	OL	270	1	2711963	0.9938	NOG147201	olfactory receptor 724	-	-	-	-	17	16	1.0625	0.4269	0.414154	0.585846	mus
Olfr725	10090.ENSMUSP00000087282	OL	0	0	0	0	NOG150980	olfactory receptor 725	-	-	-	-	29	15	1.93333	0.39218	0.282054	0.717946	mus
Olfr726	10090.ENSMUSP00000072207	OL	0	0	0	0	NOG150980	olfactory receptor 726	-	-	-	-	29	15	1.93333	0.39218	0.282054	0.717946	mus
Olfr727	10090.ENSMUSP00000078145	OL	270	1	2711963	0.9938	NOG150980	olfactory receptor 727	-	-	-	-	29	15	1.93333	0.39218	0.282054	0.717946	mus
Olfr728	10090.ENSMUSP00000052079	OL	270	1	2711963	0.9938	NOG148675	olfactory receptor 728	-	-	-	-	19	15	1.26667	0.41153	0.365654	0.634346	mus
Olfr729	10090.ENSMUSP00000051755	OL	270	1	2711963	0.9938	NOG146473	olfactory receptor 729	-	-	-	-	14	13	1.07692	0.39407	0.379736	0.620264	mus
Olfr73	10090.ENSMUSP00000097426	OL	0	0	0	0	NOG133219	olfactory receptor 73	-	-	-	-	33	13	2.53846	0.27585	0.173136	0.826864	mus
Olfr730	10090.ENSMUSP00000060325	OL	270	1	2711963	0.9938	NOG148173	olfactory receptor 730	-	-	-	-	13	12	1.08333	0.38139	0.366428	0.633572	mus
Olfr731	10090.ENSMUSP00000050705	OL	0	0	0	0	NOG145515	olfactory receptor 731	-	-	-	-	5	5	1	0.24969	0.24969	0.75031	mus
Olfr732	10090.ENSMUSP00000075285	OL	270	1	2711963	0.9938	NOG43237	olfactory receptor 732	-	-	-	-	32	17	1.88235	0.42672	0.311023	0.688977	mus
Olfr733	10090.ENSMUSP00000071195	OL	0	0	0	0	NOG43237	olfactory receptor 733	-	-	-	-	32	17	1.88235	0.42672	0.311023	0.688977	mus
Olfr734	10090.ENSMUSP00000057376	OL	270	1	2711963	0.9938	NOG67996	olfactory receptor 734	-	-	-	-	17	16	1.0625	0.4269	0.414154	0.585846	mus
Olfr735	10090.ENSMUSP00000056851	OL	270	1	2711963	0.9938	NOG146555	olfactory receptor 735	-	-	-	-	9	8	1.125	0.31698	0.298852	0.701148	mus
Olfr736	10090.ENSMUSP00000062700	OL	0	0	0	0	NOG150830	olfactory receptor 736	-	-	-	-	6	6	1	0.27798	0.27798	0.72202	mus
Olfr738	10090.ENSMUSP00000059540	OL	0	0	0	0	NOG72414	olfactory receptor 738	-	-	-	-	47	17	2.76471	0.40071	0.240994	0.759006	mus
Olfr739	10090.ENSMUSP00000074740	OL	0	0	0	0	NOG72414	olfactory receptor 739	-	-	-	-	47	17	2.76471	0.40071	0.240994	0.759006	mus
Olfr74	10090.ENSMUSP00000097428	OL	270	1	2711963	0.9938	NOG133219	olfactory receptor 74	-	-	-	-	33	13	2.53846	0.27585	0.173136	0.826864	mus
Olfr740	10090.ENSMUSP00000087276	OL	0	0	0	0	NOG72414	olfactory receptor 740	-	-	-	-	47	17	2.76471	0.40071	0.240994	0.759006	mus
Olfr741	10090.ENSMUSP00000071824	OL	0	0	0	0	NOG72414	olfactory receptor 741	-	-	-	-	47	17	2.76471	0.40071	0.240994	0.759006	mus
Olfr742	10090.ENSMUSP00000087273	OL	0	0	0	0	NOG72414	olfactory receptor 742	-	-	-	-	47	17	2.76471	0.40071	0.240994	0.759006	mus
Olfr649	10090.ENSMUSP00000050903	OL	0	0	0	0	NOG148238	olfactory receptor 649	-	-	-	-	8	5	1.6	0.23181	0.183262	0.816738	mus
Olfr744	10090.ENSMUSP00000066496	OL	0	0	0	0	NOG72414	olfactory receptor 744	-	-	-	-	47	17	2.76471	0.40071	0.240994	0.759006	mus
Olfr745	10090.ENSMUSP00000050184	OL	0	0	0	0	NOG40487	olfactory receptor 745	-	-	-	-	11	11	1	0.37201	0.37201	0.62799	mus
Olfr746	10090.ENSMUSP00000079451	OL	0	0	0	0	NOG149319	olfactory receptor 746	-	-	-	-	21	15	1.4	0.40064	0.338603	0.661397	mus
Olfr747	10090.ENSMUSP00000077220	OL	0	0	0	0	NOG75876	olfactory receptor 747	-	-	-	-	18	14	1.28571	0.38867	0.342775	0.657225	mus
Olfr748	10090.ENSMUSP00000073251	OL	0	0	0	0	NOG149319	olfactory receptor 748	-	-	-	-	21	15	1.4	0.40064	0.338603	0.661397	mus
Olfr749	10090.ENSMUSP00000074242	OL	0	0	0	0	NOG75876	olfactory receptor 749	-	-	-	-	18	14	1.28571	0.38867	0.342775	0.657225	mus
Olfr750	10090.ENSMUSP00000036596	OL	270	1	2711963	0.9938	NOG150844	olfactory receptor 750	-	-	-	-	17	15	1.13333	0.40947	0.384631	0.615369	mus
Olfr76	10090.ENSMUSP00000085124	OL	270	1	2711963	0.9938	NOG43073	olfactory receptor 76	-	-	-	-	28	17	1.64706	0.38435	0.299483	0.700517	mus
Olfr761	10090.ENSMUSP00000092917	OL	0	0	0	0	NOG132856	olfactory receptor 761	-	-	-	-	429	22	19.5	0.30323	0.0686681	0.931332	mus
Olfr763	10090.ENSMUSP00000076671	OL	0	0	0	0	NOG27118	olfactory receptor 763	-	-	-	-	21	13	1.61538	0.37243	0.293027	0.706973	mus
Olfr611	10090.ENSMUSP00000077246	OL	0	0	0	0	NOG70811	olfactory receptor 611	-	-	-	-	11	7	1.57143	0.28643	0.228492	0.771508	mus
Olfr765	10090.ENSMUSP00000071490	OL	270	1	2711963	0.9938	NOG41315	olfactory receptor 765	-	-	-	-	44	18	2.44444	0.43217	0.276417	0.723583	mus
Olfr766	10090.ENSMUSP00000089620	OL	0	0	0	0	NOG133746	olfactory receptor 766	-	-	-	-	2	2	1	0.10754	0.10754	0.89246	mus
Olfr767	10090.ENSMUSP00000080775	OL	270	1	2711963	0.9938	NOG41315	olfactory receptor 767	-	-	-	-	44	18	2.44444	0.43217	0.276417	0.723583	mus
Olfr768	10090.ENSMUSP00000089619	OL	0	0	0	0	NOG147433	olfactory receptor 768	-	-	-	-	3	3	1	0.17044	0.17044	0.82956	mus
Olfr769	10090.ENSMUSP00000059078	OL	0	0	0	0	NOG43260	olfactory receptor 769	-	-	-	-	146	19	7.68421	0.42721	0.154114	0.845886	mus
Olfr77	10090.ENSMUSP00000058810	OL	0	0	0	0	NOG150292	olfactory receptor 77	-	-	-	-	111	21	5.28571	0.44183	0.192178	0.807822	mus
Olfr770	10090.ENSMUSP00000055193	OL	0	0	0	0	NOG43260	olfactory receptor 770	-	-	-	-	146	19	7.68421	0.42721	0.154114	0.845886	mus
Olfr771	10090.ENSMUSP00000077948	OL	0	0	0	0	NOG43260	olfactory receptor 771	-	-	-	-	146	19	7.68421	0.42721	0.154114	0.845886	mus
Olfr772	10090.ENSMUSP00000079096	OL	0	0	0	0	NOG43260	olfactory receptor 772	-	-	-	-	146	19	7.68421	0.42721	0.154114	0.845886	mus
Olfr1223	10090.ENSMUSP00000097381	OL	0	0	0	0	NOG129537	olfactory receptor 1223	-	-	-	-	27	11	2.45455	0.31909	0.20367	0.79633	mus
Olfr1221	10090.ENSMUSP00000097383	OL	0	0	0	0	-	-	-	-	-	-	-	-	-	-	-	-	mus
Olfr687	10090.ENSMUSP00000095758	OL	270	1	2711963	0.9938	NOG40832	olfactory receptor 687	-	-	-	-	32	13	2.46154	0.35608	0.226957	0.773043	mus
Olfr777	10090.ENSMUSP00000079191	OL	0	0	0	0	NOG43260	olfactory receptor 777	-	-	-	-	146	19	7.68421	0.42721	0.154114	0.845886	mus
Olfr779	10090.ENSMUSP00000089616	OL	0	0	0	0	NOG79829	olfactory receptor 779	-	-	-	-	57	18	3.16667	0.40434	0.227219	0.772781	mus
Olfr78	10090.ENSMUSP00000058085	OL	270	1	2711963	0.9938	NOG42859	olfactory receptor 78	-	-	-	-	15	15	1	0.42013	0.42013	0.57987	mus
Olfr780	10090.ENSMUSP00000054927	OL	0	0	0	0	NOG150258	olfactory receptor 780	-	-	-	-	27	13	2.07692	0.37445	0.259827	0.740173	mus
Olfr781	10090.ENSMUSP00000075041	OL	0	0	0	0	NOG149419	olfactory receptor 781	-	-	-	-	22	12	1.83333	0.35677	0.263492	0.736508	mus
Olfr782	10090.ENSMUSP00000076282	OL	0	0	0	0	NOG79829	olfactory receptor 782	-	-	-	-	57	18	3.16667	0.40434	0.227219	0.772781	mus
Olfr784	10090.ENSMUSP00000080953	OL	0	0	0	0	NOG79829	olfactory receptor 784	-	-	-	-	57	18	3.16667	0.40434	0.227219	0.772781	mus
Olfr786	10090.ENSMUSP00000075827	OL	270	1	2711963	0.9938	NOG82448	olfactory receptor 786	-	-	-	-	32	17	1.88235	0.42	0.306125	0.693875	mus
Olfr787	10090.ENSMUSP00000077005	OL	0	0	0	0	NOG84491	olfactory receptor 787	-	-	-	-	5	3	1.66667	0.16366	0.12677	0.87323	mus
Olfr788	10090.ENSMUSP00000054710	OL	270	1	2711963	0.9938	NOG41836	olfactory receptor 788	-	-	-	-	31	12	2.58333	0.34311	0.213473	0.786527	mus
Olfr790	10090.ENSMUSP00000052235	OL	0	0	0	0	NOG151135	olfactory receptor 790	-	-	-	-	29	15	1.93333	0.3968	0.285377	0.714623	mus
Olfr791	10090.ENSMUSP00000052722	OL	270	1	2711963	0.9938	NOG43260	olfactory receptor 791	-	-	-	-	146	19	7.68421	0.42721	0.154114	0.845886	mus
Olfr792	10090.ENSMUSP00000096707	OL	0	0	0	0	-	-	-	-	-	-	-	-	-	-	-	NA	mus
Olfr794	10090.ENSMUSP00000049790	OL	0	0	0	0	NOG43260	olfactory receptor 794	-	-	-	-	146	19	7.68421	0.42721	0.154114	0.845886	mus
Olfr796	10090.ENSMUSP00000040207	OL	270	1	2711963	0.9938	NOG27118	olfactory receptor 796	-	-	-	-	21	13	1.61538	0.37243	0.293027	0.706973	mus
Olfr798	10090.ENSMUSP00000078739	OL	0	0	0	0	-	-	-	-	-	-	-	-	-	-	-	NA	mus
Olfr799	10090.ENSMUSP00000071126	OL	0	0	0	0	NOG149419	olfactory receptor 799	-	-	-	-	22	12	1.83333	0.35677	0.263492	0.736508	mus
Olfr8	10090.ENSMUSP00000080282	OL	0	0	0	0	-	-	-	-	-	-	-	-	-	-	-	NA	mus
Olfr800	10090.ENSMUSP00000075930	OL	0	0	0	0	NOG43260	olfactory receptor 800	-	-	-	-	146	19	7.68421	0.42721	0.154114	0.845886	mus
Olfr801	10090.ENSMUSP00000071941	OL	0	0	0	0	-	-	-	-	-	-	-	-	-	-	-	NA	mus
Olfr802	10090.ENSMUSP00000074275	OL	270	1	2711963	0.9938	NOG82448	olfactory receptor 802	-	-	-	-	32	17	1.88235	0.42	0.306125	0.693875	mus
Olfr803	10090.ENSMUSP00000055860	OL	0	0	0	0	NOG41836	olfactory receptor 803	-	-	-	-	31	12	2.58333	0.34311	0.213473	0.786527	mus
Olfr222	10090.ENSMUSP00000071835	OL	270	1	2711963	0.9938	NOG39029	olfactory receptor 222	-	-	-	-	52	18	2.88889	0.42061	0.247465	0.752535	mus
Olfr805	10090.ENSMUSP00000092874	OL	0	0	0	0	NOG79829	olfactory receptor 805	-	-	-	-	57	18	3.16667	0.40434	0.227219	0.772781	mus
Olfr806	10090.ENSMUSP00000092873	OL	0	0	0	0	NOG79829	olfactory receptor 806	-	-	-	-	57	18	3.16667	0.40434	0.227219	0.772781	mus
Olfr807	10090.ENSMUSP00000049924	OL	0	0	0	0	NOG43260	olfactory receptor 807	-	-	-	-	146	19	7.68421	0.42721	0.154114	0.845886	mus
Olfr808	10090.ENSMUSP00000059714	OL	0	0	0	0	NOG147390	olfactory receptor 808	-	-	-	-	9	8	1.125	0.31698	0.298852	0.701148	mus
Olfr809	10090.ENSMUSP00000054949	OL	0	0	0	0	NOG151268	olfactory receptor 809	-	-	-	-	16	11	1.45455	0.35786	0.296721	0.703279	mus
Olfr810	10090.ENSMUSP00000089612	OL	0	0	0	0	NOG147653	olfactory receptor 810	-	-	-	-	9	4	2.25	0.21238	0.141587	0.858413	mus
Olfr811	10090.ENSMUSP00000075768	OL	0	0	0	0	NOG147395	olfactory receptor 811	-	-	-	-	4	4	1	0.21507	0.21507	0.78493	mus
Olfr812	10090.ENSMUSP00000053359	OL	0	0	0	0	NOG79829	olfactory receptor 812	-	-	-	-	57	18	3.16667	0.40434	0.227219	0.772781	mus
Olfr813	10090.ENSMUSP00000063431	OL	0	0	0	0	NOG151268	olfactory receptor 813	-	-	-	-	16	11	1.45455	0.35786	0.296721	0.703279	mus
Olfr814	10090.ENSMUSP00000080106	OL	0	0	0	0	NOG145553	olfactory receptor 814	-	-	-	-	21	13	1.61538	0.38267	0.301084	0.698916	mus
Olfr815	10090.ENSMUSP00000071488	OL	0	0	0	0	NOG145553	olfactory receptor 815	-	-	-	-	21	13	1.61538	0.38267	0.301084	0.698916	mus
Olfr816	10090.ENSMUSP00000071534	OL	0	0	0	0	NOG147653	olfactory receptor 816	-	-	-	-	9	4	2.25	0.21238	0.141587	0.858413	mus
Olfr818	10090.ENSMUSP00000073918	OL	0	0	0	0	-	-	-	-	-	-	-	-	-	-	-	NA	mus
Olfr819	10090.ENSMUSP00000092869	OL	0	0	0	0	NOG43500	olfactory receptor 819	-	-	-	-	8	4	2	0.20492	0.1449	0.8551	mus
Olfr820	10090.ENSMUSP00000052995	OL	0	0	0	0	NOG82766	olfactory receptor 820	-	-	-	-	14	6	2.33333	0.253	0.165627	0.834373	mus
Olfr821	10090.ENSMUSP00000056626	OL	0	0	0	0	NOG149956	olfactory receptor 821	-	-	-	-	16	12	1.33333	0.3713	0.321556	0.678444	mus
Olfr822	10090.ENSMUSP00000079316	OL	0	0	0	0	NOG151135	olfactory receptor 822	-	-	-	-	29	15	1.93333	0.3968	0.285377	0.714623	mus
Olfr823	10090.ENSMUSP00000080189	OL	0	0	0	0	NOG39077	olfactory receptor 823	-	-	-	-	58	7	8.28571	0.25224	0.0876292	0.912371	mus
Olfr824	10090.ENSMUSP00000073794	OL	0	0	0	0	NOG39077	olfactory receptor 824	-	-	-	-	58	7	8.28571	0.25224	0.0876292	0.912371	mus
Olfr825	10090.ENSMUSP00000076091	OL	0	0	0	0	NOG39616	olfactory receptor 825	-	-	-	-	44	20	2.2	0.44684	0.301259	0.698741	mus
Olfr826	10090.ENSMUSP00000077436	OL	0	0	0	0	NOG39616	olfactory receptor 826	-	-	-	-	44	20	2.2	0.44684	0.301259	0.698741	mus
Olfr827	10090.ENSMUSP00000089609	OL	0	0	0	0	NOG39616	olfactory receptor 827	-	-	-	-	44	20	2.2	0.44684	0.301259	0.698741	mus
Olfr1289	10090.ENSMUSP00000077188	OL	270	1	2711963	0.9938	NOG146672	olfactory receptor 1289	-	-	-	-	18	11	1.63636	0.35125	0.274585	0.725415	mus
Olfr829	10090.ENSMUSP00000058101	OL	0	0	0	0	NOG80984	olfactory receptor 829	-	-	-	-	58	9	6.44444	0.22391	0.0882025	0.911797	mus
Olfr830	10090.ENSMUSP00000077903	OL	0	0	0	0	NOG128713	olfactory receptor 830	-	-	-	-	48	11	4.36364	0.33374	0.159766	0.840234	mus
Olfr832	10090.ENSMUSP00000056724	OL	270	1	2711963	0.9938	NOG128713	olfactory receptor 832	-	-	-	-	48	11	4.36364	0.33374	0.159766	0.840234	mus
Olfr834	10090.ENSMUSP00000083680	OL	270	1	2711963	0.9938	NOG128713	olfactory receptor 834	-	-	-	-	48	11	4.36364	0.33374	0.159766	0.840234	mus
Olfr835	10090.ENSMUSP00000052610	OL	0	0	0	0	NOG80984	olfactory receptor 835	-	-	-	-	58	9	6.44444	0.22391	0.0882025	0.911797	mus
Olfr836	10090.ENSMUSP00000074514	OL	0	0	0	0	NOG128713	olfactory receptor 836	-	-	-	-	48	11	4.36364	0.33374	0.159766	0.840234	mus
Olfr1084	10090.ENSMUSP00000097465	OL	0	0	0	0	NOG129290	olfactory receptor 1084	-	-	-	-	98	17	5.76471	0.33176	0.138177	0.861823	mus
Olfr843	10090.ENSMUSP00000051027	OL	0	0	0	0	-	-	-	-	-	-	-	-	-	-	-	NA	mus
Olfr844	10090.ENSMUSP00000061570	OL	0	0	0	0	NOG128713	olfactory receptor 844	-	-	-	-	48	11	4.36364	0.33374	0.159766	0.840234	mus
Olfr845	10090.ENSMUSP00000071239	OL	270	1	2711963	0.9938	NOG128713	olfactory receptor 845	-	-	-	-	48	11	4.36364	0.33374	0.159766	0.840234	mus
Olfr846	10090.ENSMUSP00000077830	OL	0	0	0	0	NOG80984	olfactory receptor 846	-	-	-	-	58	9	6.44444	0.22391	0.0882025	0.911797	mus
Olfr847	10090.ENSMUSP00000078568	OL	0	0	0	0	NOG80984	olfactory receptor 847	-	-	-	-	58	9	6.44444	0.22391	0.0882025	0.911797	mus
Olfr849	10090.ENSMUSP00000064123	OL	0	0	0	0	NOG128713	olfactory receptor 849	-	-	-	-	48	11	4.36364	0.33374	0.159766	0.840234	mus
Olfr850	10090.ENSMUSP00000076569	OL	0	0	0	0	NOG128713	olfactory receptor 850	-	-	-	-	48	11	4.36364	0.33374	0.159766	0.840234	mus
Olfr851	10090.ENSMUSP00000066500	OL	0	0	0	0	-	-	-	-	-	-	-	-	-	-	-	NA	mus
Olfr853	10090.ENSMUSP00000053262	OL	0	0	0	0	NOG128713	olfactory receptor 853	-	-	-	-	48	11	4.36364	0.33374	0.159766	0.840234	mus
Olfr854	10090.ENSMUSP00000072248	OL	270	1	2711963	0.9938	NOG128713	olfactory receptor 854	-	-	-	-	48	11	4.36364	0.33374	0.159766	0.840234	mus
Olfr855	10090.ENSMUSP00000054790	OL	0	0	0	0	NOG145134	olfactory receptor 855	-	-	-	-	4	3	1.33333	0.1613	0.13969	0.86031	mus
Olfr1160	10090.ENSMUSP00000097427	OL	0	0	0	0	NOG77329	olfactory receptor 1160	-	-	-	-	12	6	2	0.23886	0.1689	0.8311	mus
Olfr707	10090.ENSMUSP00000086062	OL	270	1	2711963	0.9938	NOG74246	olfactory receptor 707	-	-	-	-	37	17	2.17647	0.4003	0.271337	0.728663	mus
Olfr860	10090.ENSMUSP00000076281	OL	0	0	0	0	NOG46199	olfactory receptor 860	-	-	-	-	58	12	4.83333	0.34704	0.157854	0.842146	mus
Olfr862	10090.ENSMUSP00000073437	OL	0	0	0	0	NOG46199	olfactory receptor 862	-	-	-	-	58	12	4.83333	0.34704	0.157854	0.842146	mus
Olfr866	10090.ENSMUSP00000054864	OL	0	0	0	0	NOG44891	olfactory receptor 866	-	-	-	-	40	10	4	0.20946	0.10473	0.89527	mus
Olfr867	10090.ENSMUSP00000057469	OL	0	0	0	0	NOG150292	olfactory receptor 867; Possible olfactory or taste receptor	-	-	-	-	111	21	5.28571	0.44183	0.192178	0.807822	mus
Olfr868	10090.ENSMUSP00000050040	OL	0	0	0	0	-	-	-	-	-	-	-	-	-	-	-	NA	mus
Olfr869	10090.ENSMUSP00000075135	OL	0	0	0	0	NOG46199	olfactory receptor 869	-	-	-	-	58	12	4.83333	0.34704	0.157854	0.842146	mus
Olfr870	10090.ENSMUSP00000091405	OL	0	0	0	0	NOG151150	olfactory receptor 870	-	-	-	-	7	6	1.16667	0.27117	0.251054	0.748946	mus
Olfr871	10090.ENSMUSP00000072865	OL	0	0	0	0	NOG151150	olfactory receptor 871	-	-	-	-	7	6	1.16667	0.27117	0.251054	0.748946	mus
Olfr872	10090.ENSMUSP00000083665	OL	0	0	0	0	NOG46199	olfactory receptor 872	-	-	-	-	58	12	4.83333	0.34704	0.157854	0.842146	mus
Olfr873	10090.ENSMUSP00000054778	OL	270	1	2711963	0.9938	NOG46199	olfactory receptor 873	-	-	-	-	58	12	4.83333	0.34704	0.157854	0.842146	mus
Olfr874	10090.ENSMUSP00000076009	OL	270	1	2711963	0.9938	NOG44152	olfactory receptor 874	-	-	-	-	39	17	2.29412	0.41746	0.275618	0.724382	mus
Olfr875	10090.ENSMUSP00000079467	OL	0	0	0	0	NOG44152	olfactory receptor 875	-	-	-	-	39	17	2.29412	0.41746	0.275618	0.724382	mus
Olfr876	10090.ENSMUSP00000083231	OL	0	0	0	0	NOG44152	olfactory receptor 876	-	-	-	-	39	17	2.29412	0.41746	0.275618	0.724382	mus
Olfr877	10090.ENSMUSP00000083230	OL	0	0	0	0	NOG76188	olfactory receptor 877	-	-	-	-	6	6	1	0.27798	0.27798	0.72202	mus
Olfr878	10090.ENSMUSP00000083228	OL	270	1	2711963	0.9938	NOG75803	olfactory receptor 878	-	-	-	-	14	13	1.07692	0.39407	0.379736	0.620264	mus
Olfr881	10090.ENSMUSP00000074193	OL	0	0	0	0	NOG76317	olfactory receptor 881	-	-	-	-	39	10	3.9	0.30088	0.152357	0.847643	mus
Olfr883	10090.ENSMUSP00000072741	OL	0	0	0	0	NOG76317	olfactory receptor 883	-	-	-	-	39	10	3.9	0.30088	0.152357	0.847643	mus
Olfr884	10090.ENSMUSP00000076912	OL	0	0	0	0	NOG76317	olfactory receptor 884	-	-	-	-	39	10	3.9	0.30088	0.152357	0.847643	mus
Olfr885	10090.ENSMUSP00000080646	OL	0	0	0	0	NOG76317	olfactory receptor 885	-	-	-	-	39	10	3.9	0.30088	0.152357	0.847643	mus
Olfr887	10090.ENSMUSP00000074248	OL	0	0	0	0	NOG76317	olfactory receptor 887	-	-	-	-	39	10	3.9	0.30088	0.152357	0.847643	mus
Olfr888	10090.ENSMUSP00000074713	OL	0	0	0	0	NOG76317	olfactory receptor 888	-	-	-	-	39	10	3.9	0.30088	0.152357	0.847643	mus
Olfr889	10090.ENSMUSP00000072137	OL	0	0	0	0	NOG76317	olfactory receptor 889	-	-	-	-	39	10	3.9	0.30088	0.152357	0.847643	mus
Olfr890	10090.ENSMUSP00000078733	OL	0	0	0	0	NOG76317	olfactory receptor 890	-	-	-	-	39	10	3.9	0.30088	0.152357	0.847643	mus
Olfr891	10090.ENSMUSP00000055451	OL	0	0	0	0	NOG68623	olfactory receptor 891	-	-	-	-	15	5	3	0.18693	0.107924	0.892076	mus
Olfr893	10090.ENSMUSP00000091390	OL	0	0	0	0	NOG68623	olfactory receptor 893	-	-	-	-	15	5	3	0.18693	0.107924	0.892076	mus
Olfr894	10090.ENSMUSP00000091389	OL	0	0	0	0	NOG68623	olfactory receptor 894	-	-	-	-	15	5	3	0.18693	0.107924	0.892076	mus
Olfr895	10090.ENSMUSP00000091387	OL	0	0	0	0	NOG68623	olfactory receptor 895	-	-	-	-	15	5	3	0.18693	0.107924	0.892076	mus
Olfr898	10090.ENSMUSP00000075824	OL	0	0	0	0	NOG68623	olfactory receptor 898	-	-	-	-	15	5	3	0.18693	0.107924	0.892076	mus
Olfr978	10090.ENSMUSP00000060106	OL	270	1	2711963	0.9938	NOG41301	olfactory receptor 978	-	-	-	-	37	13	2.84615	0.37586	0.222791	0.777209	mus
Olfr9	10090.ENSMUSP00000089622	OL	0	0	0	0	NOG27118	olfactory receptor 9; Odorant receptor (Potential)	-	-	-	-	21	13	1.61538	0.37243	0.293027	0.706973	mus
Olfr90	10090.ENSMUSP00000065322	OL	270	1	2711963	0.9938	NOG115807	olfactory receptor 90	-	-	-	-	54	20	2.7	0.4376	0.266315	0.733685	mus
Olfr995	10090.ENSMUSP00000097508	OL	270	1	2711963	0.9938	NOG45497	olfactory receptor 995	-	-	-	-	36	15	2.4	0.39022	0.251886	0.748114	mus
Olfr901	10090.ENSMUSP00000066714	OL	0	0	0	0	NOG76317	olfactory receptor 901	-	-	-	-	39	10	3.9	0.30088	0.152357	0.847643	mus
Olfr902	10090.ENSMUSP00000055975	OL	0	0	0	0	NOG44371	olfactory receptor 902	-	-	-	-	90	16	5.625	0.35322	0.148931	0.851069	mus
Olfr904	10090.ENSMUSP00000057148	OL	0	0	0	0	NOG44371	olfactory receptor 904	-	-	-	-	90	16	5.625	0.35322	0.148931	0.851069	mus
Olfr905	10090.ENSMUSP00000057998	OL	0	0	0	0	NOG44371	olfactory receptor 905	-	-	-	-	90	16	5.625	0.35322	0.148931	0.851069	mus
Olfr906	10090.ENSMUSP00000039040	OL	0	0	0	0	NOG44371	olfactory receptor 906	-	-	-	-	90	16	5.625	0.35322	0.148931	0.851069	mus
Olfr907	10090.ENSMUSP00000051531	OL	0	0	0	0	NOG44371	olfactory receptor 907	-	-	-	-	90	16	5.625	0.35322	0.148931	0.851069	mus
Olfr1111	10090.ENSMUSP00000097446	OL	270	1	2711963	0.9938	NOG42328	olfactory receptor 1111	-	-	-	-	12	8	1.5	0.28147	0.229819	0.770181	mus
Olfr1170	10090.ENSMUSP00000097419	OL	0	0	0	0	NOG39566	olfactory receptor 1170	-	-	-	-	39	13	3	0.35118	0.202754	0.797246	mus
Olfr910	10090.ENSMUSP00000072947	OL	0	0	0	0	NOG44371	olfactory receptor 910	-	-	-	-	90	16	5.625	0.35322	0.148931	0.851069	mus
Olfr912	10090.ENSMUSP00000071604	OL	0	0	0	0	NOG44371	olfactory receptor 912	-	-	-	-	90	16	5.625	0.35322	0.148931	0.851069	mus
Olfr913	10090.ENSMUSP00000079876	OL	0	0	0	0	NOG44371	olfactory receptor 913	-	-	-	-	90	16	5.625	0.35322	0.148931	0.851069	mus
Olfr914	10090.ENSMUSP00000053405	OL	0	0	0	0	NOG44371	olfactory receptor 914	-	-	-	-	90	16	5.625	0.35322	0.148931	0.851069	mus
Olfr998	10090.ENSMUSP00000059970	OL	0	0	0	0	NOG47957	olfactory receptor 998; Potential odorant receptor	-	-	-	-	14	6	2.33333	0.24721	0.161837	0.838163	mus
Olfr916	10090.ENSMUSP00000079959	OL	0	0	0	0	NOG44371	olfactory receptor 916	-	-	-	-	90	16	5.625	0.35322	0.148931	0.851069	mus
Olfr917	10090.ENSMUSP00000075857	OL	0	0	0	0	NOG44371	olfactory receptor 917	-	-	-	-	90	16	5.625	0.35322	0.148931	0.851069	mus
Olfr918	10090.ENSMUSP00000057210	OL	0	0	0	0	NOG120041	olfactory receptor 918	-	-	-	-	2	2	1	0.10754	0.10754	0.89246	mus
Olfr919	10090.ENSMUSP00000071372	OL	0	0	0	0	NOG124373	olfactory receptor 919	-	-	-	-	97	20	4.85	0.3752	0.17037	0.82963	mus
Olfr920	10090.ENSMUSP00000074300	OL	0	0	0	0	NOG44371	olfactory receptor 920	-	-	-	-	90	16	5.625	0.35322	0.148931	0.851069	mus
Olfr921	10090.ENSMUSP00000051879	OL	0	0	0	0	NOG44371	olfactory receptor 921	-	-	-	-	90	16	5.625	0.35322	0.148931	0.851069	mus
Olfr922	10090.ENSMUSP00000057086	OL	0	0	0	0	NOG151154	olfactory receptor 922	-	-	-	-	5	4	1.25	0.20668	0.18486	0.81514	mus
Olfr923	10090.ENSMUSP00000062073	OL	0	0	0	0	NOG44371	olfactory receptor 923	-	-	-	-	90	16	5.625	0.35322	0.148931	0.851069	mus
Olfr924	10090.ENSMUSP00000072744	OL	270	1	2711963	0.9938	NOG130634	olfactory receptor 924	-	-	-	-	15	12	1.25	0.37171	0.332468	0.667532	mus
Olfr926	10090.ENSMUSP00000077405	OL	270	1	2711963	0.9938	NOG130634	olfactory receptor 926	-	-	-	-	15	12	1.25	0.37171	0.332468	0.667532	mus
Olfr93	10090.ENSMUSP00000053499	OL	0	0	0	0	NOG115807	olfactory receptor 93	-	-	-	-	54	20	2.7	0.4376	0.266315	0.733685	mus
Olfr930	10090.ENSMUSP00000076151	OL	270	1	2711963	0.9938	-	-	-	-	-	-	-	-	-	-	-	NA	mus
Olfr933	10090.ENSMUSP00000075102	OL	270	1	2711963	0.9938	NOG44891	olfactory receptor 933	-	-	-	-	40	10	4	0.20946	0.10473	0.89527	mus
Olfr934	10090.ENSMUSP00000073835	OL	0	0	0	0	NOG87115	olfactory receptor 934	-	-	-	-	26	17	1.52941	0.42477	0.343472	0.656528	mus
Olfr935	10090.ENSMUSP00000079572	OL	0	0	0	0	NOG124373	olfactory receptor 935	-	-	-	-	97	20	4.85	0.3752	0.17037	0.82963	mus
Olfr936	10090.ENSMUSP00000080928	OL	0	0	0	0	NOG124373	olfactory receptor 936	-	-	-	-	97	20	4.85	0.3752	0.17037	0.82963	mus
Olfr937	10090.ENSMUSP00000058346	OL	0	0	0	0	NOG124373	olfactory receptor 937	-	-	-	-	97	20	4.85	0.3752	0.17037	0.82963	mus
Olfr938	10090.ENSMUSP00000055053	OL	0	0	0	0	NOG124373	olfactory receptor 938	-	-	-	-	97	20	4.85	0.3752	0.17037	0.82963	mus
Olfr94	10090.ENSMUSP00000055232	OL	270	1	2711963	0.9938	NOG43426	olfactory receptor 94	-	-	-	-	9	8	1.125	0.31698	0.298852	0.701148	mus
Olfr943	10090.ENSMUSP00000071545	OL	0	0	0	0	NOG47818	olfactory receptor 943	-	-	-	-	32	8	4	0.30624	0.15312	0.84688	mus
Olfr944	10090.ENSMUSP00000078595	OL	0	0	0	0	-	-	-	-	-	-	-	-	-	-	-	NA	mus
Olfr945	10090.ENSMUSP00000076169	OL	0	0	0	0	-	-	-	-	-	-	-	-	-	-	-	NA	mus
Olfr948	10090.ENSMUSP00000075834	OL	0	0	0	0	NOG47818	olfactory receptor 948	-	-	-	-	32	8	4	0.30624	0.15312	0.84688	mus
Olfr95	10090.ENSMUSP00000058929	OL	270	1	2711963	0.9938	NOG145065	olfactory receptor 95	-	-	-	-	9	9	1	0.34088	0.34088	0.65912	mus
Olfr951	10090.ENSMUSP00000077615	OL	0	0	0	0	NOG47818	olfactory receptor 951	-	-	-	-	32	8	4	0.30624	0.15312	0.84688	mus
Olfr952	10090.ENSMUSP00000073558	OL	0	0	0	0	NOG124373	olfactory receptor 952	-	-	-	-	97	20	4.85	0.3752	0.17037	0.82963	mus
Olfr954	10090.ENSMUSP00000079205	OL	0	0	0	0	NOG47818	olfactory receptor 954	-	-	-	-	32	8	4	0.30624	0.15312	0.84688	mus
Olfr955	10090.ENSMUSP00000073602	OL	0	0	0	0	NOG124373	olfactory receptor 955	-	-	-	-	97	20	4.85	0.3752	0.17037	0.82963	mus
Olfr957	10090.ENSMUSP00000054536	OL	0	0	0	0	NOG124373	olfactory receptor 957	-	-	-	-	97	20	4.85	0.3752	0.17037	0.82963	mus
Olfr958	10090.ENSMUSP00000049930	OL	0	0	0	0	NOG115464	olfactory receptor 958; Potential odorant receptor	-	-	-	-	12	11	1.09091	0.36759	0.35194	0.64806	mus
Olfr959	10090.ENSMUSP00000078176	OL	0	0	0	0	NOG87115	olfactory receptor 959	-	-	-	-	26	17	1.52941	0.42477	0.343472	0.656528	mus
Olfr96	10090.ENSMUSP00000077338	OL	0	0	0	0	NOG151097	olfactory receptor 96	-	-	-	-	8	6	1.33333	0.26884	0.232823	0.767177	mus
Olfr960	10090.ENSMUSP00000076315	OL	0	0	0	0	NOG43587	olfactory receptor 960	-	-	-	-	27	13	2.07692	0.34389	0.238622	0.761378	mus
Olfr961	10090.ENSMUSP00000075863	OL	0	0	0	0	NOG43587	olfactory receptor 961	-	-	-	-	27	13	2.07692	0.34389	0.238622	0.761378	mus
Olfr963	10090.ENSMUSP00000073139	OL	0	0	0	0	NOG43587	olfactory receptor 963	-	-	-	-	27	13	2.07692	0.34389	0.238622	0.761378	mus
Olfr965	10090.ENSMUSP00000069696	OL	0	0	0	0	NOG124373	olfactory receptor 965	-	-	-	-	97	20	4.85	0.3752	0.17037	0.82963	mus
Olfr967	10090.ENSMUSP00000064201	OL	0	0	0	0	NOG124373	olfactory receptor 967	-	-	-	-	97	20	4.85	0.3752	0.17037	0.82963	mus
Olfr968	10090.ENSMUSP00000096472	OL	0	0	0	0	NOG124373	olfactory receptor 968	-	-	-	-	97	20	4.85	0.3752	0.17037	0.82963	mus
Olfr969	10090.ENSMUSP00000074151	OL	0	0	0	0	NOG124373	olfactory receptor 969	-	-	-	-	97	20	4.85	0.3752	0.17037	0.82963	mus
Olfr97	10090.ENSMUSP00000094937	OL	0	0	0	0	NOG87706	olfactory receptor 97	-	-	-	-	16	3	5.33333	0.14693	0.0636226	0.936377	mus
Olfr970	10090.ENSMUSP00000071132	OL	0	0	0	0	NOG124373	olfactory receptor 970	-	-	-	-	97	20	4.85	0.3752	0.17037	0.82963	mus
Olfr971	10090.ENSMUSP00000074913	OL	0	0	0	0	NOG124373	olfactory receptor 971	-	-	-	-	97	20	4.85	0.3752	0.17037	0.82963	mus
Olfr972	10090.ENSMUSP00000078700	OL	0	0	0	0	NOG124373	olfactory receptor 972	-	-	-	-	97	20	4.85	0.3752	0.17037	0.82963	mus
Olfr974	10090.ENSMUSP00000062985	OL	0	0	0	0	NOG116514	olfactory receptor 974	-	-	-	-	10	7	1.42857	0.29271	0.244899	0.755101	mus
Olfr975	10090.ENSMUSP00000059776	OL	0	0	0	0	NOG148600	olfactory receptor 975	-	-	-	-	4	4	1	0.21507	0.21507	0.78493	mus
Olfr976	10090.ENSMUSP00000053184	OL	0	0	0	0	-	-	-	-	-	-	-	-	-	-	-	NA	mus
Olfr978	10090.ENSMUSP00000060106	OL	270	1	2711963	0.9938	NOG41301	olfactory receptor 978	-	-	-	-	37	13	2.84615	0.37586	0.222791	0.777209	mus
Olfr979	10090.ENSMUSP00000079648	OL	270	1	2711963	0.9938	NOG41301	olfactory receptor 979	-	-	-	-	37	13	2.84615	0.37586	0.222791	0.777209	mus
Olfr98	10090.ENSMUSP00000094936	OL	0	0	0	0	NOG87706	olfactory receptor 98	-	-	-	-	16	3	5.33333	0.14693	0.0636226	0.936377	mus
Olfr980	10090.ENSMUSP00000091386	OL	0	0	0	0	NOG41301	olfactory receptor 980	-	-	-	-	37	13	2.84615	0.37586	0.222791	0.777209	mus
Olfr981	10090.ENSMUSP00000057952	OL	270	1	2711963	0.9938	NOG68506	olfactory receptor 981	-	-	-	-	13	13	1	0.39793	0.39793	0.60207	mus
Olfr982	10090.ENSMUSP00000052705	OL	270	1	2711963	0.9938	NOG74082	olfactory receptor 982	-	-	-	-	9	9	1	0.34088	0.34088	0.65912	mus
Olfr983	10090.ENSMUSP00000083206	OL	0	0	0	0	NOG76317	olfactory receptor 983	-	-	-	-	39	10	3.9	0.30088	0.152357	0.847643	mus
Olfr984	10090.ENSMUSP00000060787	OL	270	1	2711963	0.9938	NOG147236	olfactory receptor 984	-	-	-	-	10	10	1	0.35723	0.35723	0.64277	mus
Olfr985	10090.ENSMUSP00000058372	OL	270	1	2711963	0.9938	NOG123563	olfactory receptor 985	-	-	-	-	23	15	1.53333	0.37788	0.305166	0.694834	mus
Olfr986	10090.ENSMUSP00000056713	OL	270	1	2711963	0.9938	NOG42217	olfactory receptor 986	-	-	-	-	25	14	1.78571	0.33929	0.253902	0.746098	mus
Olfr987	10090.ENSMUSP00000097513	OL	0	0	0	0	NOG45497	olfactory receptor 987	-	-	-	-	36	15	2.4	0.39022	0.251886	0.748114	mus
Olfr988	10090.ENSMUSP00000097512	OL	0	0	0	0	NOG45497	olfactory receptor 988	-	-	-	-	36	15	2.4	0.39022	0.251886	0.748114	mus
Olfr99	10090.ENSMUSP00000076781	OL	0	0	0	0	NOG87706	olfactory receptor 99	-	-	-	-	16	3	5.33333	0.14693	0.0636226	0.936377	mus
Olfr992	10090.ENSMUSP00000097511	OL	2	0	1	0	NOG45497	olfactory receptor 992	-	-	-	-	36	15	2.4	0.39022	0.251886	0.748114	mus
Olfr993	10090.ENSMUSP00000097510	OL	270	1	2711963	0.9938	NOG45497	olfactory receptor 993	-	-	-	-	36	15	2.4	0.39022	0.251886	0.748114	mus
Olfr994	10090.ENSMUSP00000097509	OL	0	0	0	0	NOG45497	olfactory receptor 994	-	-	-	-	36	15	2.4	0.39022	0.251886	0.748114	mus
Olfr995	10090.ENSMUSP00000097508	OL	270	1	2711963	0.9938	NOG45497	olfactory receptor 995	-	-	-	-	36	15	2.4	0.39022	0.251886	0.748114	mus
Olfr996	10090.ENSMUSP00000076330	OL	0	0	0	0	NOG47957	olfactory receptor 996	-	-	-	-	14	6	2.33333	0.24721	0.161837	0.838163	mus
Olfr998	10090.ENSMUSP00000059970	OL	0	0	0	0	NOG47957	olfactory receptor 998; Potential odorant receptor	-	-	-	-	14	6	2.33333	0.24721	0.161837	0.838163	mus
Adcy3	10090.ENSMUSP00000020984	OL-AC	95	0.4114	1026105	0.5078	-	-	KOG3619	adenylate cyclase 3; Mediates odorant detection (possibly) via modulation of intracellular c [...]	COG2114	adenylate cyclase 3; Mediates odorant detection (possibly) via modulation of intracellular c [...]	294	37	7.94595	0.86441	0.306653	0.693347	mus
B3gnt2	10090.ENSMUSP00000060247	OL-AC	0	0	0	0	-	-	KOG2287	UDP-GlcNAc:betaGal beta-1,3-N-acetylglucosaminyltransferase 2; Catalyzes the initiation and [...]	-	-	425	38	11.1842	0.86453	0.25851	0.74149	mus
Bbs1	10090.ENSMUSP00000055321	OL-AC	0	0	0	0	NOG69487	Bardet-Biedl syndrome 1 homolog (human)	-	-	-	-	23	20	1.15	0.45486	0.424159	0.575841	mus
Bbs4	10090.ENSMUSP00000026265	OL-AC	0	0	0	0	-	-	KOG1124	Bardet-Biedl syndrome 4 homolog (human); May be required for the dynein-mediated transport o [...]	COG0457	Bardet-Biedl syndrome 4 homolog (human); May be required for the dynein-mediated transport o [...]	673	53	12.6981	0.9237	0.259216	0.740784	mus
Cnga2	10090.ENSMUSP00000006020	OL-AC	0	0	0	0	-	-	KOG0500	cyclic nucleotide gated channel alpha 2; Odorant signal transduction is probably mediated by [...]	-	-	136	37	3.67568	0.87579	0.456805	0.543195	mus
Cnga4	10090.ENSMUSP00000033187	OL-AC	13	0.4359	323077	0.7257	-	-	KOG0500	cyclic nucleotide gated channel alpha 4; Second messenger, cAMP, causes the opening of catio [...]	-	-	136	37	3.67568	0.87579	0.456805	0.543195	mus
Drd2	10090.ENSMUSP00000075170	OL-AC	8	0.3214	317500	0.5786	-	-	KOG3656	dopamine receptor 2; This is one of the five types (D1 to D5) of receptors for dopamine. The [...]	-	-	4774	34	140.412	0.84789	0.0715546	0.928445	mus
Fzd2	10090.ENSMUSP00000091463	OL-AC	42	0.4634	332857	0.5292	-	-	KOG3577	frizzled homolog 2 (Drosophila); Receptor for Wnt proteins. Most of frizzled receptors are c [...]	-	-	467	34	13.7353	0.86303	0.232866	0.767134	mus
Gjb4	10090.ENSMUSP00000053307	OL-AC	17	1	198235	0.9195	NOG39157	gap junction membrane channel protein beta 4; One gap junction consists of a cluster of clos [...]	-	-	-	-	46	24	1.91667	0.4823	0.348372	0.651628	mus
Gnal	10090.ENSMUSP00000025402	OL-AC	327	0.6931	2348869	0.9199	-	-	KOG0099	guanine nucleotide binding protein, alpha stimulating, olfactory type; Guanine nucleotide-bi [...]	-	-	72	34	2.11765	0.85792	0.589549	0.410451	mus
Grm7	10090.ENSMUSP00000064404	OL-AC	7	0.8571	211429	0.804	-	-	KOG1056	glutamate receptor, metabotropic 7; Receptor for glutamate. The activity of this receptor is [...]	-	-	1397	34	41.0882	0.67551	0.105384	0.894616	mus
Grm8	10090.ENSMUSP00000087998	OL-AC	8	0.6429	190000	0.7303	-	-	KOG1056	glutamate receptor, metabotropic 8; Receptor for glutamate. The activity of this receptor is [...]	-	-	1397	34	41.0882	0.67551	0.105384	0.894616	mus
Mkks	10090.ENSMUSP00000028730	OL-AC	0	0	0	0	-	-	KOG0360	McKusick-Kaufman syndrome protein; May play a role in protein processing in limb, cardiac an [...]	COG0459	McKusick-Kaufman syndrome protein; May play a role in protein processing in limb, cardiac an [...]	99	53	1.86792	0.95899	0.701673	0.298327	mus
Omp	10090.ENSMUSP00000095882	OL-AC	2	0	1	0	NOG81738	olfactory marker protein; May act as a modulator of the olfactory signal- transduction cascade	-	-	-	-	6	6	1	0.27798	0.27798	0.72202	mus
Slc6a3	10090.ENSMUSP00000022100	OL-AC	0	0	0	0	-	-	KOG3659	solute carrier family 6 (neurotransmitter transporter, dopamine), member 3; Amine transporte [...]	COG0733	solute carrier family 6 (neurotransmitter transporter, dopamine), member 3; Amine transporte [...]	309	36	8.58333	0.87023	0.297034	0.702966	mus
Olfr2	10090.ENSMUSP00000091656	OL-AC	270	1	2711963	0.9938	NOG48149	olfactory receptor 2	-	-	-	-	50	21	2.38095	0.44725	0.289851	0.710149	mus
Olfr710	10090.ENSMUSP00000062956	OL-AC	0	0	0	0	NOG149129	olfactory receptor 710	-	-	-	-	10	6	1.66667	0.26308	0.203781	0.796219	mus
Tas1r3	10090.ENSMUSP00000030949	TS1	4	0.5	1015000	0.4805	-	-	KOG1056	taste receptor, type 1, member 3; Putative taste receptor. TAS1R1/TAS1R3 responds to the uma [...]	-	-	1397	34	41.0882	0.67551	0.105384	0.894616	mus
Tas1r2	10090.ENSMUSP00000030510	TS1	4	0.3333	1102500	0.3998	-	-	KOG1056	taste receptor, type 1, member 2; Putative taste receptor. TAS1R2/TAS1R3 recognizes diverse [...]	-	-	1397	34	41.0882	0.67551	0.105384	0.894616	mus
Tas1r1	10090.ENSMUSP00000030792	TS1	2	1	225000	0.2549	-	-	KOG1056	taste receptor, type 1, member 1; Putative taste receptor. TAS1R1/TAS1R3 responds to the uma [...]	-	-	1397	34	41.0882	0.67551	0.105384	0.894616	mus
Tas2r7	10090.ENSMUSP00000063954	TS2	1	0	410000	0.0098	NOG45213	taste receptor, type 2, member 130; Gustducin-coupled receptor implicated in the perception [...]	-	-	-	-	25	15	1.66667	0.40036	0.310117	0.689883	mus
Tas2r41	10090.ENSMUSP00000056581	TS2	1	0	410000	0.0098	NOG29380	taste receptor, type 2, member 126; Receptor that may play a role in the perception of bitte [...]	-	-	-	-	9	8	1.125	0.31698	0.298852	0.701148	mus
Tas2r40	10090.ENSMUSP00000067734	TS2	1	0	410000	0.0098	NOG28890	taste receptor, type 2, member 144; Gustducin-coupled receptor implicated in the perception [...]	-	-	-	-	16	9	1.77778	0.29835	0.223762	0.776238	mus
Tas2r4	10090.ENSMUSP00000044089	TS2	1	0	410000	0.0098	NOG42218	taste receptor, type 2, member 108; Gustducin-coupled receptor for denatonium and N(6)- prop [...]	-	-	-	-	15	15	1	0.42013	0.42013	0.57987	mus
Tas2r39	10090.ENSMUSP00000062919	TS2	1	0	410000	0.0098	NOG28890	taste receptor, type 2, member 139; Putative taste receptor which may play a role in the per [...]	-	-	-	-	16	9	1.77778	0.29835	0.223762	0.776238	mus
Tas2r38	10090.ENSMUSP00000075876	TS2	1	0	410000	0.0098	NOG43295	taste receptor, type 2, member 138; Putative taste receptor which may play a role in the per [...]	-	-	-	-	18	16	1.125	0.42001	0.395989	0.604011	mus
Tas2r3	10090.ENSMUSP00000063743	TS2	1	0	410000	0.0098	NOG27838	taste receptor, type 2, member 137; Gustducin-coupled receptor implicated in the perception [...]	-	-	-	-	15	15	1	0.42013	0.42013	0.57987	mus
Tas2r16	10090.ENSMUSP00000053700	TS2	1	0	410000	0.0098	NOG39234	taste receptor, type 2, member 118; Gustducin-coupled receptor implicated in the perception [...]	-	-	-	-	15	12	1.25	0.37712	0.337306	0.662694	mus
Tas2r143	10090.ENSMUSP00000057910	TS2	1	0	410000	0.0098	NOG39234	taste receptor, type 2, member 143; Putative taste receptor which may play a role in the per [...]	-	-	-	-	15	12	1.25	0.37712	0.337306	0.662694	mus
Tas2r140	10090.ENSMUSP00000093040	TS2	1	0	410000	0.0098	NOG46292	taste receptor, type 2, member 140; Receptor that may play a role in the perception of bitte [...]	-	-	-	-	15	5	3	0.16764	0.096787	0.903213	mus
Tas2r136	10090.ENSMUSP00000070791	TS2	1	0	410000	0.0098	NOG43462	taste receptor, type 2, member 136; Putative taste receptor which may play a role in the per [...]	-	-	-	-	19	7	2.71429	0.26508	0.160897	0.839103	mus
Tas2r135	10090.ENSMUSP00000070247	TS2	1	0	410000	0.0098	NOG45884	taste receptor, type 2, member 135; Putative taste receptor which may play a role in the per [...]	-	-	-	-	10	10	1	0.35723	0.35723	0.64277	mus
Tas2r134	10090.ENSMUSP00000064657	TS2	1	0	410000	0.0098	NOG114055	taste receptor, type 2, member 134; Putative taste receptor which may play a role in the per [...]	-	-	-	-	4	4	1	0.21507	0.21507	0.78493	mus
Tas2r131	10090.ENSMUSP00000080736	TS2	1	0	410000	0.0098	NOG43990	taste receptor, type 2, member 131	-	-	-	-	9	9	1	0.34088	0.34088	0.65912	mus
Tas2r13	10090.ENSMUSP00000093044	TS2	1	0	410000	0.0098	NOG42620	taste receptor, type 2, member 121; Receptor that may play a role in the perception of bitte [...]	-	-	-	-	5	5	1	0.24969	0.24969	0.75031	mus
Tas2r129	10090.ENSMUSP00000067640	TS2	1	0	410000	0.0098	NOG46292	taste receptor, type 2, member 129; Putative taste receptor which may play a role in the per [...]	-	-	-	-	15	5	3	0.16764	0.096787	0.903213	mus
Tas2r125	10090.ENSMUSP00000075483	TS2	1	0	410000	0.0098	NOG46292	taste receptor, type 2, member 125; Putative taste receptor which may play a role in the per [...]	-	-	-	-	15	5	3	0.16764	0.096787	0.903213	mus
Tas2r124	10090.ENSMUSP00000075509	TS2	1	0	410000	0.0098	NOG28890	taste receptor, type 2, member 124; Putative taste receptor which may play a role in the per [...]	-	-	-	-	16	9	1.77778	0.29835	0.223762	0.776238	mus
Tas2r123	10090.ENSMUSP00000071615	TS2	1	0	410000	0.0098	NOG46292	taste receptor, type 2, member 123; Gustducin-coupled receptor implicated in the perception [...]	-	-	-	-	15	5	3	0.16764	0.096787	0.903213	mus
Tas2r120	10090.ENSMUSP00000071626	TS2	1	0	410000	0.0098	NOG43462	taste receptor, type 2, member 120; Putative taste receptor which may play a role in the per [...]	-	-	-	-	19	7	2.71429	0.26508	0.160897	0.839103	mus
Tas2r119	10090.ENSMUSP00000050277	TS2	1	0	410000	0.0098	NOG48043	taste receptor, type 2, member 119; Gustducin-coupled receptor implicated in the perception [...]	-	-	-	-	14	14	1	0.40943	0.40943	0.59057	mus
Tas2r117	10090.ENSMUSP00000069768	TS2	1	0	410000	0.0098	NOG46292	taste receptor, type 2, member 117; Putative taste receptor which may play a role in the per [...]	-	-	-	-	15	5	3	0.16764	0.096787	0.903213	mus
Tas2r116	10090.ENSMUSP00000032315	TS2	1	0	410000	0.0098	NOG46292	taste receptor, type 2, member 116; Putative taste receptor which may play a role in the per [...]	-	-	-	-	15	5	3	0.16764	0.096787	0.903213	mus
Tas2r115	10090.ENSMUSP00000093043	TS2	1	0	410000	0.0098	-	-	-	-	-	-	-	-	-	-	-	NA	mus
Tas2r114	10090.ENSMUSP00000079453	TS2	1	0	410000	0.0098	NOG46344	taste receptor, type 2, member 114; Putative taste receptor which may play a role in the per [...]	-	-	-	-	25	13	1.92308	0.3692	0.266234	0.733766	mus
Tas2r113	10090.ENSMUSP00000078044	TS2	1	0	410000	0.0098	NOG46292	taste receptor, type 2, member 113; Putative taste receptor which may play a role in the per [...]	-	-	-	-	15	5	3	0.16764	0.096787	0.903213	mus
Tas2r110	10090.ENSMUSP00000080674	TS2	1	0	410000	0.0098	NOG46292	taste receptor, type 2, member 110; Gustducin-coupled receptor implicated in the perception [...]	-	-	-	-	15	5	3	0.16764	0.096787	0.903213	mus
Tas2r109	10090.ENSMUSP00000069300	TS2	1	0	410000	0.0098	NOG46292	taste receptor, type 2, member 109; Putative taste receptor which may play a role in the per [...]	-	-	-	-	15	5	3	0.16764	0.096787	0.903213	mus
Tas2r107	10090.ENSMUSP00000067082	TS2	1	0	410000	0.0098	NOG46344	Taste receptor type 2 member 107 (T2R107) (mT2R43) (T2R4) (STC5-1); Putative taste receptor [...]	-	-	-	-	25	13	1.92308	0.3692	0.266234	0.733766	mus
Tas2r106	10090.ENSMUSP00000076043	TS2	1	0	410000	0.0098	NOG46344	taste receptor, type 2, member 106; Putative taste receptor which may play a role in the per [...]	-	-	-	-	25	13	1.92308	0.3692	0.266234	0.733766	mus
Tas2r105	10090.ENSMUSP00000058006	TS2	1	0	410000	0.0098	NOG46344	taste receptor, type 2, member 105; Gustducin-coupled cycloheximide receptor implicated in t [...]	-	-	-	-	25	13	1.92308	0.3692	0.266234	0.733766	mus
Tas2r104	10090.ENSMUSP00000072237	TS2	1	0	410000	0.0098	NOG117869	taste receptor, type 2, member 104; Putative taste receptor which may play a role in the per [...]	-	-	-	-	2	2	1	0.10754	0.10754	0.89246	mus
Tas2r103	10090.ENSMUSP00000032317	TS2	0	0	0	0	NOG46292	taste receptor, type 2, member 103; Gustducin-coupled receptor implicated in the perception [...]	-	-	-	-	15	5	3	0.16764	0.096787	0.903213	mus
Tas2r102	10090.ENSMUSP00000068332	TS2	1	0	410000	0.0098	NOG28890	taste receptor, type 2, member 102; Putative taste receptor which may play a role in the per [...]	-	-	-	-	16	9	1.77778	0.29835	0.223762	0.776238	mus
Wnt10b	10090.ENSMUSP00000023732	TS-AC	16	0.65	354375	0.4233	-	-	KOG3913	wingless related MMTV integration site 10b; Ligand for members of the frizzled family of sev [...]	-	-	528	34	15.5294	0.86418	0.219294	0.780706	mus
Scnn1g	10090.ENSMUSP00000000221	TS-AC	3	0.6667	76667	0.5621	-	-	KOG4294	sodium channel, nonvoltage-gated 1 gamma; Sodium permeable non-voltage-sensitive ion channel [...]	-	-	329	34	9.67647	0.82691	0.265827	0.734173	mus
Scnn1b	10090.ENSMUSP00000033161	TS-AC	3	0.6667	76667	0.5621	-	-	KOG4294	sodium channel, nonvoltage-gated 1 beta; Sodium permeable non-voltage-sensitive ion channel [...]	-	-	329	34	9.67647	0.82691	0.265827	0.734173	mus
Scnn1a	10090.ENSMUSP00000080164	TS-AC	2	1	30000	0.6667	-	-	KOG4294	sodium channel, nonvoltage-gated, type I, alpha; Sodium permeable non-voltage-sensitive ion [...]	-	-	329	34	9.67647	0.82691	0.265827	0.734173	mus
Rtp4	10090.ENSMUSP00000041091	TS-AC	0	0	0	0	NOG42817	receptor transporter protein 4	-	-	-	-	19	18	1.05556	0.44549	0.433607	0.566393	mus
Rtp3	10090.ENSMUSP00000081985	TS-AC	0	0	0	0	NOG43194	receptor transporter protein 3	-	-	-	-	19	18	1.05556	0.44549	0.433607	0.566393	mus
Plcb2	10090.ENSMUSP00000099583	TS-AC	5	0.6	834000	0.6272	-	-	KOG1265	phospholipase C, beta 2; The production of the second messenger molecules diacylglycerol (DA [...]	-	-	135	35	3.85714	0.86868	0.44231	0.55769	mus
P2rx2	10090.ENSMUSP00000054233	TS-AC	14	1	275000	0.7133	NOG68669	purinergic receptor P2X, ligand-gated ion channel, 2	-	-	-	-	23	23	1	0.48645	0.48645	0.51355	mus
Lef1	10090.ENSMUSP00000029611	TS-AC	15	0.4	824000	0.6717	-	-	KOG3248	lymphoid enhancer binding factor 1; Participates in the Wnt signaling pathway. Activates tra [...]	-	-	127	34	3.73529	0.84749	0.438503	0.561497	mus
Itpr3	10090.ENSMUSP00000038150	TS-AC	46	0.3623	767826	0.4572	-	-	KOG3533	inositol 1,4,5-triphosphate receptor 3; Receptor for inositol 1,4,5-trisphosphate, a second [...]	-	-	98	36	2.72222	0.86449	0.52396	0.47604	mus
Gpr120	10090.ENSMUSP00000063660	TS-AC	0	0	0	0	-	-	KOG3656	G protein-coupled receptor 120; Receptor for unsaturated long-chain free fatty acid (FAA). B [...]	-	-	4774	34	140.412	0.84789	0.0715546	0.928445	mus
Gng13	10090.ENSMUSP00000026836	TS-AC	9	0.75	1152222	0.51	-	-	KOG4119	guanine nucleotide binding protein 13, gamma; Guanine nucleotide-binding proteins (G protein [...]	-	-	276	33	8.36364	0.83864	0.289987	0.710013	mus
Gnb1	10090.ENSMUSP00000030940	TS-AC	334	0.6654	2333772	0.8916	-	-	KOG0286	guanine nucleotide binding protein, beta 1; Guanine nucleotide-binding proteins (G proteins) [...]	COG2319	guanine nucleotide binding protein, beta 1; Guanine nucleotide-binding proteins (G proteins) [...]	191	49	3.89796	0.91809	0.465015	0.534985	mus
Gnat3	10090.ENSMUSP00000030561	TS-AC	41	0.0098	117805	0.1266	-	-	KOG0082	guanine nucleotide binding protein, alpha transducing 3; Guanine nucleotide-binding protein [...]	-	-	362	49	7.38775	0.92493	0.340293	0.659707	mus
Gnat2	10090.ENSMUSP00000009252	TS-AC	38	0.4922	933158	0.5809	-	-	KOG0082	guanine nucleotide binding protein, alpha transducing 2; Guanine nucleotide-binding proteins [...]	-	-	362	49	7.38775	0.92493	0.340293	0.659707	mus
Gnat1	10090.ENSMUSP00000010205	TS-AC	27	0.6268	870000	0.5714	-	-	KOG0082	guanine nucleotide binding protein, alpha transducing 1; Guanine nucleotide-binding proteins [...]	-	-	362	49	7.38775	0.92493	0.340293	0.659707	mus
ENSMUSG00000074323	10090.ENSMUSP00000096333	TS-AC	0	0	0	0	NOG73315	annotation not available	-	-	-	-	45	2	22.5	0.06092	0.0128431	0.987157	mus
ENSMUSG00000027071	10090.ENSMUSP00000028465	TS-AC	14	1	275000	0.7133	NOG40178	purinergic receptor P2X, ligand-gated ion channel, 3; Receptor for ATP that acts as a ligand [...]	-	-	-	-	30	25	1.2	0.48912	0.446503	0.553497	mus
V1ra8	10090.ENSMUSP00000077479	VN	0	0	0	0	NOG77521	vomeronasal 1 receptor, A8; Putative pheromone receptor implicated in the regulation of soci [...]	-	-	-	-	49	5	9.8	0.14976	0.0478391	0.952161	mus
V1rh19	10090.ENSMUSP00000089329	VN	0	0	0	0	-	-	-	-	-	-	-	-	-	-	-	NA	mus
V1rc29	10090.ENSMUSP00000087363	VN	0	0	0	0	-	-	-	-	-	-	-	-	-	-	-	NA	mus
V1rc16	10090.ENSMUSP00000080952	VN	0	0	0	0	-	-	-	-	-	-	-	-	-	-	-	NA	mus
V1rc26	10090.ENSMUSP00000073098	VN	0	0	0	0	-	-	-	-	-	-	-	-	-	-	-	NA	mus
V1re12	10090.ENSMUSP00000061885	VN	0	0	0	0	NOG78462	vomeronasal 1 receptor, E12	-	-	-	-	105	22	4.77273	0.39563	0.181095	0.818905	mus
V1rh17	10090.ENSMUSP00000089333	VN	0	0	0	0	-	-	-	-	-	-	-	-	-	-	-	NA	mus
V1rh2	10090.ENSMUSP00000074566	VN	0	0	0	0	-	-	-	-	-	-	-	-	-	-	-	NA	mus
ENSMUSG00000068426	10090.ENSMUSP00000087264	VN	0	0	0	0	-	-	-	-	-	-	-	-	-	-	-	NA	mus
V1rh15	10090.ENSMUSP00000072206	VN	0	0	0	0	-	-	-	-	-	-	-	-	-	-	-	NA	mus
V1ri1	10090.ENSMUSP00000072426	VN	0	0	0	0	-	-	-	-	-	-	-	-	-	-	-	NA	mus
V1ri9	10090.ENSMUSP00000058480	VN	0	0	0	0	NOG78462	vomeronasal 1 receptor, I9	-	-	-	-	105	22	4.77273	0.39563	0.181095	0.818905	mus
V1ri6	10090.ENSMUSP00000089330	VN	0	0	0	0	NOG78462	vomeronasal 1 receptor, I6	-	-	-	-	105	22	4.77273	0.39563	0.181095	0.818905	mus
V1rh21	10090.ENSMUSP00000089328	VN	0	0	0	0	NOG81553	vomeronasal 1 receptor, H21	-	-	-	-	5	2	2.5	0.10441	0.0660347	0.933965	mus
V1ri3	10090.ENSMUSP00000089327	VN	0	0	0	0	-	-	-	-	-	-	-	-	-	-	-	NA	mus
V1rh4	10090.ENSMUSP00000089326	VN	0	0	0	0	-	-	-	-	-	-	-	-	-	-	-	NA	mus
V1rh3	10090.ENSMUSP00000089325	VN	0	0	0	0	-	-	-	-	-	-	-	-	-	-	-	NA	mus
V1ri4	10090.ENSMUSP00000089324	VN	0	0	0	0	NOG78462	vomeronasal 1 receptor, I4	-	-	-	-	105	22	4.77273	0.39563	0.181095	0.818905	mus
V1ri7	10090.ENSMUSP00000077711	VN	0	0	0	0	NOG78462	vomeronasal 1 receptor, I7	-	-	-	-	105	22	4.77273	0.39563	0.181095	0.818905	mus
V1rh11	10090.ENSMUSP00000089322	VN	0	0	0	0	NOG46301	vomeronasal 1 receptor, H11	-	-	-	-	65	14	4.64286	0.35464	0.164587	0.835413	mus
V1rh8	10090.ENSMUSP00000073934	VN	0	0	0	0	-	-	-	-	-	-	-	-	-	-	-	NA	mus
V1rh7	10090.ENSMUSP00000075392	VN	0	0	0	0	-	-	-	-	-	-	-	-	-	-	-	NA	mus
V1rh9	10090.ENSMUSP00000093663	VN	0	0	0	0	-	-	-	-	-	-	-	-	-	-	-	NA	mus
V1rc28	10090.ENSMUSP00000079950	VN	0	0	0	0	-	-	-	-	-	-	-	-	-	-	-	NA	mus
V1rh10	10090.ENSMUSP00000071925	VN	0	0	0	0	-	-	-	-	-	-	-	-	-	-	-	NA	mus
V1rh20	10090.ENSMUSP00000073405	VN	0	0	0	0	NOG81553	vomeronasal 1 receptor, H20	-	-	-	-	5	2	2.5	0.10441	0.0660347	0.933965	mus
V1rh18	10090.ENSMUSP00000093655	VN	0	0	0	0	NOG147412	vomeronasal 1 receptor, H18	-	-	-	-	2	2	1	0.10754	0.10754	0.89246	mus
V1rh6	10090.ENSMUSP00000076163	VN	0	0	0	0	-	-	-	-	-	-	-	-	-	-	-	NA	mus
V1rh5	10090.ENSMUSP00000073868	VN	0	0	0	0	-	-	-	-	-	-	-	-	-	-	-	NA	mus
V1ri2	10090.ENSMUSP00000072739	VN	0	0	0	0	-	-	-	-	-	-	-	-	-	-	-	NA	mus
V1ri10	10090.ENSMUSP00000079139	VN	0	0	0	0	NOG78462	vomeronasal 1 receptor, I10	-	-	-	-	105	22	4.77273	0.39563	0.181095	0.818905	mus
V1rh14	10090.ENSMUSP00000089314	VN	0	0	0	0	-	-	-	-	-	-	-	-	-	-	-	NA	mus
V1ri5	10090.ENSMUSP00000074519	VN	0	0	0	0	-	-	-	-	-	-	-	-	-	-	-	NA	mus
V1rh13	10090.ENSMUSP00000075537	VN	0	0	0	0	-	-	-	-	-	-	-	-	-	-	-	NA	mus
V1rc23	10090.ENSMUSP00000078796	VN	0	0	0	0	-	-	-	-	-	-	-	-	-	-	-	NA	mus
V1rh12	10090.ENSMUSP00000072222	VN	0	0	0	0	-	-	-	-	-	-	-	-	-	-	-	NA	mus
V1rh16	10090.ENSMUSP00000076365	VN	0	0	0	0	-	-	-	-	-	-	-	-	-	-	-	NA	mus
V1re5	10090.ENSMUSP00000056068	VN	0	0	0	0	NOG117283	vomeronasal 1 receptor, E5	-	-	-	-	7	3	2.33333	0.14827	0.0970656	0.902934	mus
V1re2	10090.ENSMUSP00000058266	VN	0	0	0	0	NOG84328	vomeronasal 1 receptor, E2	-	-	-	-	9	3	3	0.16458	0.0950203	0.90498	mus
V1re3	10090.ENSMUSP00000072243	VN	0	0	0	0	NOG84328	vomeronasal 1 receptor, E3	-	-	-	-	9	3	3	0.16458	0.0950203	0.90498	mus
V1re1	10090.ENSMUSP00000076045	VN	0	0	0	0	NOG84328	vomeronasal 1 receptor, E1	-	-	-	-	9	3	3	0.16458	0.0950203	0.90498	mus
V1rc24	10090.ENSMUSP00000087343	VN	0	0	0	0	-	-	-	-	-	-	-	-	-	-	-	NA	mus
V1re8	10090.ENSMUSP00000061330	VN	0	0	0	0	-	-	-	-	-	-	-	-	-	-	-	NA	mus
V1re7	10090.ENSMUSP00000056228	VN	0	0	0	0	-	-	-	-	-	-	-	-	-	-	-	NA	mus
V1re4	10090.ENSMUSP00000076261	VN	0	0	0	0	NOG84328	vomeronasal 1 receptor, E4	-	-	-	-	9	3	3	0.16458	0.0950203	0.90498	mus
V1rf5	10090.ENSMUSP00000062473	VN	0	0	0	0	NOG78462	vomeronasal 1 receptor, F5	-	-	-	-	105	22	4.77273	0.39563	0.181095	0.818905	mus
V1rf1	10090.ENSMUSP00000078579	VN	0	0	0	0	NOG78462	vomeronasal 1 receptor, F1	-	-	-	-	105	22	4.77273	0.39563	0.181095	0.818905	mus
V1rf2	10090.ENSMUSP00000061689	VN	0	0	0	0	NOG78462	vomeronasal 1 receptor, F2	-	-	-	-	105	22	4.77273	0.39563	0.181095	0.818905	mus
V1rf4	10090.ENSMUSP00000064103	VN	0	0	0	0	NOG78462	vomeronasal 1 receptor, F4	-	-	-	-	105	22	4.77273	0.39563	0.181095	0.818905	mus
V1rf3	10090.ENSMUSP00000076531	VN	0	0	0	0	NOG78462	vomeronasal 1 receptor, F3	-	-	-	-	105	22	4.77273	0.39563	0.181095	0.818905	mus
V1rc18	10090.ENSMUSP00000073301	VN	0	0	0	0	-	-	-	-	-	-	-	-	-	-	-	NA	mus
V1rc17	10090.ENSMUSP00000052301	VN	0	0	0	0	-	-	-	-	-	-	-	-	-	-	-	NA	mus
V1rc33	10090.ENSMUSP00000093547	VN	0	0	0	0	-	-	-	-	-	-	-	-	-	-	-	NA	mus
V1rc25	10090.ENSMUSP00000059442	VN	0	0	0	0	-	-	-	-	-	-	-	-	-	-	-	NA	mus
V1rc15	10090.ENSMUSP00000078536	VN	0	0	0	0	-	-	-	-	-	-	-	-	-	-	-	NA	mus
V1rc14	10090.ENSMUSP00000078619	VN	0	0	0	0	-	-	-	-	-	-	-	-	-	-	-	NA	mus
V1rc12	10090.ENSMUSP00000071362	VN	0	0	0	0	-	-	-	-	-	-	-	-	-	-	-	NA	mus
V1rc11	10090.ENSMUSP00000075159	VN	0	0	0	0	-	-	-	-	-	-	-	-	-	-	-	NA	mus
V1rc10	10090.ENSMUSP00000076691	VN	0	0	0	0	-	-	-	-	-	-	-	-	-	-	-	NA	mus
V1rc13	10090.ENSMUSP00000087263	VN	0	0	0	0	-	-	-	-	-	-	-	-	-	-	-	NA	mus
V1rc21	10090.ENSMUSP00000094369	VN	0	0	0	0	-	-	-	-	-	-	-	-	-	-	-	NA	mus
V1rb7	10090.ENSMUSP00000074655	VN	0	0	0	0	NOG77521	vomeronasal 1 receptor, B7; Putative pheromone receptor implicated in the regulation of soci [...]	-	-	-	-	49	5	9.8	0.14976	0.0478391	0.952161	mus
V1ra6	10090.ENSMUSP00000086840	VN	0	0	0	0	NOG77521	vomeronasal 1 receptor, A6; Putative pheromone receptor implicated in the regulation of soci [...]	-	-	-	-	49	5	9.8	0.14976	0.0478391	0.952161	mus
V1ra5	10090.ENSMUSP00000086839	VN	0	0	0	0	NOG77521	vomeronasal 1 receptor, A5; Putative pheromone receptor implicated in the regulation of soci [...]	-	-	-	-	49	5	9.8	0.14976	0.0478391	0.952161	mus
V1ra2	10090.ENSMUSP00000052123	VN	0	0	0	0	NOG77521	vomeronasal 1 receptor, A2; Putative pheromone receptor implicated in the regulation of soci [...]	-	-	-	-	49	5	9.8	0.14976	0.0478391	0.952161	mus
V1rb8	10090.ENSMUSP00000075197	VN	0	0	0	0	NOG77521	vomeronasal 1 receptor, B8; Putative pheromone receptor implicated in the regulation of soci [...]	-	-	-	-	49	5	9.8	0.14976	0.0478391	0.952161	mus
V1ra4	10090.ENSMUSP00000074422	VN	0	0	0	0	NOG77521	vomeronasal 1 receptor, A4; Putative pheromone receptor implicated in the regulation of soci [...]	-	-	-	-	49	5	9.8	0.14976	0.0478391	0.952161	mus
V1ra3	10090.ENSMUSP00000073121	VN	0	0	0	0	NOG77521	vomeronasal 1 receptor, A3; Putative pheromone receptor implicated in the regulation of soci [...]	-	-	-	-	49	5	9.8	0.14976	0.0478391	0.952161	mus
V1rb2	10090.ENSMUSP00000071762	VN	0	0	0	0	NOG77521	vomeronasal 1, receptor B2; Putative pheromone receptor implicated in the regulation of soci [...]	-	-	-	-	49	5	9.8	0.14976	0.0478391	0.952161	mus
V1rb1	10090.ENSMUSP00000080407	VN	0	0	0	0	NOG77521	vomeronasal 1 receptor, B1; Putative pheromone receptor implicated in the regulation of soci [...]	-	-	-	-	49	5	9.8	0.14976	0.0478391	0.952161	mus
V1ra1	10090.ENSMUSP00000072637	VN	0	0	0	0	NOG77521	vomeronasal 1 receptor, A1; Putative pheromone receptor implicated in the regulation of soci [...]	-	-	-	-	49	5	9.8	0.14976	0.0478391	0.952161	mus
V1ra7	10090.ENSMUSP00000078760	VN	0	0	0	0	NOG77521	vomeronasal 1 receptor, A7; Putative pheromone receptor implicated in the regulation of soci [...]	-	-	-	-	49	5	9.8	0.14976	0.0478391	0.952161	mus
V1rb3	10090.ENSMUSP00000075455	VN	0	0	0	0	NOG77521	vomeronasal 1 receptor, B3; Putative pheromone receptor implicated in the regulation of soci [...]	-	-	-	-	49	5	9.8	0.14976	0.0478391	0.952161	mus
V1ra9	10090.ENSMUSP00000063052	VN	0	0	0	0	NOG77521	vomeronasal 1 receptor, A9; Putative pheromone receptor implicated in the regulation of soci [...]	-	-	-	-	49	5	9.8	0.14976	0.0478391	0.952161	mus
V1rc20	10090.ENSMUSP00000078611	VN	0	0	0	0	NOG131722	vomeronasal 1 receptor, C20	-	-	-	-	2	2	1	0.10754	0.10754	0.89246	mus
V1re11	10090.ENSMUSP00000055861	VN	0	0	0	0	NOG78462	vomeronasal 1 receptor, E11	-	-	-	-	105	22	4.77273	0.39563	0.181095	0.818905	mus
V1re10	10090.ENSMUSP00000060746	VN	0	0	0	0	-	-	-	-	-	-	-	-	-	-	-	NA	mus
V1rc31	10090.ENSMUSP00000093562	VN	0	0	0	0	-	-	-	-	-	-	-	-	-	-	-	NA	mus
V1rl1	10090.ENSMUSP00000054445	VN	0	0	0	0	NOG78462	vomeronasal 1 receptor, L1	-	-	-	-	105	22	4.77273	0.39563	0.181095	0.818905	mus
V1rg2	10090.ENSMUSP00000055353	VN	0	0	0	0	NOG113005	vomeronasal 1 receptor, G2	-	-	-	-	111	11	10.0909	0.21194	0.0667187	0.933281	mus
V1rg5	10090.ENSMUSP00000055148	VN	0	0	0	0	NOG113005	vomeronasal 1 receptor, G5	-	-	-	-	111	11	10.0909	0.21194	0.0667187	0.933281	mus
V1rg6	10090.ENSMUSP00000051510	VN	0	0	0	0	NOG113005	vomeronasal 1 receptor, G6	-	-	-	-	111	11	10.0909	0.21194	0.0667187	0.933281	mus
V1rg4	10090.ENSMUSP00000055518	VN	0	0	0	0	NOG113005	vomeronasal 1 receptor, G4	-	-	-	-	111	11	10.0909	0.21194	0.0667187	0.933281	mus
V1rg7	10090.ENSMUSP00000077186	VN	0	0	0	0	NOG113005	vomeronasal 1 receptor, G7	-	-	-	-	111	11	10.0909	0.21194	0.0667187	0.933281	mus
V1rc32	10090.ENSMUSP00000093561	VN	0	0	0	0	-	-	-	-	-	-	-	-	-	-	-	NA	mus
V1rg3	10090.ENSMUSP00000074564	VN	0	0	0	0	NOG113005	vomeronasal 1 receptor, G3	-	-	-	-	111	11	10.0909	0.21194	0.0667187	0.933281	mus
V1rg9	10090.ENSMUSP00000083409	VN	0	0	0	0	NOG113005	vomeronasal 1 receptor, G9	-	-	-	-	111	11	10.0909	0.21194	0.0667187	0.933281	mus
V1rg12	10090.ENSMUSP00000072580	VN	0	0	0	0	NOG78462	vomeronasal 1 receptor, G12	-	-	-	-	105	22	4.77273	0.39563	0.181095	0.818905	mus
V1rg8	10090.ENSMUSP00000083406	VN	0	0	0	0	NOG113005	vomeronasal 1 receptor, G8	-	-	-	-	111	11	10.0909	0.21194	0.0667187	0.933281	mus
V1rg11	10090.ENSMUSP00000083405	VN	0	0	0	0	NOG78462	vomeronasal 1 receptor, G11	-	-	-	-	105	22	4.77273	0.39563	0.181095	0.818905	mus
V1rk1	10090.ENSMUSP00000092422	VN	0	0	0	0	NOG46301	vomeronasal 1 receptor, K1	-	-	-	-	65	14	4.64286	0.35464	0.164587	0.835413	mus
V1rj2	10090.ENSMUSP00000096413	VN	0	0	0	0	NOG46301	vomeronasal 1 receptor, J2	-	-	-	-	65	14	4.64286	0.35464	0.164587	0.835413	mus
Vmn2r1	10090.ENSMUSP00000029406	VN	1	0.0000	10000	0.0000	-	-	KOG1056	predicted gene, EG56544; Putative pheromone receptor	-	-	1397	34	41.0882	0.67551	0.105384	0.894616	mus
Vmn2r26	10090.ENSMUSP00000032238	VN	0	0	0	0	-	-	KOG1056	vomeronasal 2, receptor, 1b; Putative pheromone receptor	-	-	1397	34	41.0882	0.67551	0.105384	0.894616	mus
Trpc2	10090.ENSMUSP00000081903	VN-AC	1	0.0000	510000	0.3020	-	-	KOG3609	transient receptor potential cation channel, subfamily C, member 2; Thought to form a recept [...]	-	-	238	35	6.8	0.87575	0.335835	0.664165	mus
Olr1740-ps	10116.ENSRNOP00000049422	OL	0	0	0	0	NOG87706	Olfactory receptor 10 (Fragment)	-	-	-	-	16	3	5.33333	0.14693	0.0636226	0.936377	rattus
Olr1740-ps	10116.ENSRNOP00000049422	OL	0	0	0	0	NOG87706	Olfactory receptor 10 (Fragment)	-	-	-	-	16	3	5.33333	0.14693	0.0636226	0.936377	rattus
Olr1174	10116.ENSRNOP00000047732	OL	0	0	0	0	NOG150292	Olfactory receptor 1174 (Putative gustatory receptor PTE33); Possible taste receptor	-	-	-	-	111	21	5.28571	0.44183	0.192178	0.807822	rattus
ENSRNOG00000029100	10116.ENSRNOP00000042535	OL	0	0	0	0	NOG74246	olfactory receptor Olr10	-	-	-	-	37	17	2.17647	0.4003	0.271337	0.728663	rattus
ENSRNOG00000031888	10116.ENSRNOP00000042387	OL	0	0	0	0	NOG148280	olfactory receptor 640 (predicted) (Olr640_predicted), mRNA	-	-	-	-	18	8	2.25	0.27871	0.185807	0.814193	rattus
ENSRNOG00000028797	10116.ENSRNOP00000049929	OL	0	0	0	0	NOG147653	olfactory receptor Olr1002	-	-	-	-	9	4	2.25	0.21238	0.141587	0.858413	rattus
ENSRNOG00000031850	10116.ENSRNOP00000058143	OL	0	0	0	0	-	-	-	-	-	-	-	-	-	-	-	-	rattus
ENSRNOG00000029129	10116.ENSRNOP00000046881	OL	0	0	0	0	NOG79829	olfactory receptor Olr1007	-	-	-	-	57	18	3.16667	0.40434	0.227219	0.772781	rattus
ENSRNOG00000031820	10116.ENSRNOP00000040143	OL	0	0	0	0	NOG125273	olfactory receptor Olr101	-	-	-	-	19	8	2.375	0.29256	0.189838	0.810162	rattus
ENSRNOG00000039965	10116.ENSRNOP00000058125	OL	289	1	2895329	0.9972	NOG41836	olfactory receptor Olr1012	-	-	-	-	31	12	2.58333	0.34311	0.213473	0.786527	rattus
ENSRNOG00000003361	10116.ENSRNOP00000004472	OL	0	0	0	0	NOG151135	olfactory receptor Olr1014	-	-	-	-	29	15	1.93333	0.3968	0.285377	0.714623	rattus
ENSRNOG00000003347	10116.ENSRNOP00000004458	OL	289	1	2895329	0.9972	NOG27118	olfactory receptor Olr1016	-	-	-	-	21	13	1.61538	0.37243	0.293027	0.706973	rattus
ENSRNOG00000030737	10116.ENSRNOP00000043467	OL	0	0	0	0	-	-	-	-	-	-	-	-	-	-	-	-	rattus
ENSRNOG00000033964	10116.ENSRNOP00000050205	OL	0	0	0	0	NOG41836	olfactory receptor Olr1022	-	-	-	-	31	12	2.58333	0.34311	0.213473	0.786527	rattus
ENSRNOG00000029518	10116.ENSRNOP00000040908	OL	0	0	0	0	-	-	-	-	-	-	-	-	-	-	-	-	rattus
ENSRNOG00000032428	10116.ENSRNOP00000039478	OL	0	0	0	0	NOG150258	olfactory receptor Olr1006	-	-	-	-	27	13	2.07692	0.37445	0.259827	0.740173	rattus
ENSRNOG00000030169	10116.ENSRNOP00000048041	OL	0	0	0	0	NOG125273	olfactory receptor Olr103	-	-	-	-	19	8	2.375	0.29256	0.189838	0.810162	rattus
ENSRNOG00000015876	10116.ENSRNOP00000021254	OL	0	0	0	0	NOG45255	olfactory receptor Olr104	-	-	-	-	18	15	1.2	0.41257	0.376623	0.623377	rattus
ENSRNOG00000033846	10116.ENSRNOP00000046748	OL	0	0	0	0	NOG149419	olfactory receptor Olr1049	-	-	-	-	22	12	1.83333	0.35677	0.263492	0.736508	rattus
ENSRNOG00000015885	10116.ENSRNOP00000021264	OL	0	0	0	0	NOG77906	olfactory receptor Olr105	-	-	-	-	6	5	1.2	0.24213	0.221033	0.778967	rattus
ENSRNOG00000032476	10116.ENSRNOP00000047762	OL	0	0	0	0	NOG147653	olfactory receptor Olr1029	-	-	-	-	9	4	2.25	0.21238	0.141587	0.858413	rattus
ENSRNOG00000033400	10116.ENSRNOP00000058082	OL	0	0	0	0	-	-	-	-	-	-	-	-	-	-	-	-	rattus
ENSRNOG00000030191	10116.ENSRNOP00000050994	OL	0	0	0	0	-	-	-	-	-	-	-	-	-	-	-	-	rattus
ENSRNOG00000031687	10116.ENSRNOP00000040940	OL	0	0	0	0	NOG145553	olfactory receptor Olr1057	-	-	-	-	21	13	1.61538	0.38267	0.301084	0.698916	rattus
ENSRNOG00000034068	10116.ENSRNOP00000050149	OL	0	0	0	0	-	-	-	-	-	-	-	-	-	-	-	-	rattus
ENSRNOG00000032025	10116.ENSRNOP00000047678	OL	0	0	0	0	-	-	-	-	-	-	-	-	-	-	-	-	rattus
ENSRNOG00000015893	10116.ENSRNOP00000021273	OL	0	0	0	0	NOG70811	olfactory receptor Olr106	-	-	-	-	11	7	1.57143	0.28643	0.228492	0.771508	rattus
ENSRNOG00000031181	10116.ENSRNOP00000050826	OL	0	0	0	0	-	-	-	-	-	-	-	-	-	-	-	-	rattus
ENSRNOG00000032290	10116.ENSRNOP00000040890	OL	0	0	0	0	NOG147395	olfactory receptor Olr1059	-	-	-	-	4	4	1	0.21507	0.21507	0.78493	rattus
ENSRNOG00000030311	10116.ENSRNOP00000046366	OL	0	0	0	0	NOG82766	olfactory receptor Olr1063	-	-	-	-	14	6	2.33333	0.253	0.165627	0.834373	rattus
ENSRNOG00000030970	10116.ENSRNOP00000044913	OL	0	0	0	0	NOG82766	olfactory receptor Olr1065	-	-	-	-	14	6	2.33333	0.253	0.165627	0.834373	rattus
ENSRNOG00000031672	10116.ENSRNOP00000045616	OL	0	0	0	0	NOG39077	olfactory receptor Olr1067	-	-	-	-	58	7	8.28571	0.25224	0.0876292	0.912371	rattus
ENSRNOG00000029363	10116.ENSRNOP00000050166	OL	0	0	0	0	NOG39077	olfactory receptor Olr1068	-	-	-	-	58	7	8.28571	0.25224	0.0876292	0.912371	rattus
ENSRNOG00000033263	10116.ENSRNOP00000040528	OL	0	0	0	0	NOG39077	olfactory receptor Olr1069	-	-	-	-	58	7	8.28571	0.25224	0.0876292	0.912371	rattus
ENSRNOG00000015901	10116.ENSRNOP00000021282	OL	0	0	0	0	NOG87840	olfactory receptor Olr107	-	-	-	-	7	5	1.4	0.24044	0.203209	0.796791	rattus
ENSRNOG00000008464	10116.ENSRNOP00000011188	OL	0	0	0	0	NOG39616	olfactory receptor Olr1071	-	-	-	-	44	20	2.2	0.44684	0.301259	0.698741	rattus
ENSRNOG00000008460	10116.ENSRNOP00000011176	OL	0	0	0	0	NOG39616	olfactory receptor Olr1072	-	-	-	-	44	20	2.2	0.44684	0.301259	0.698741	rattus
Olr1073	10116.ENSRNOP00000046729	OL	0	0	0	0	-	-	-	-	-	-	-	-	-	-	-	-	rattus
ENSRNOG00000039449	10116.ENSRNOP00000057201	OL	289	1	2895329	0.9972	NOG147368	olfactory receptor Olr1075	-	-	-	-	41	13	3.15385	0.36135	0.203473	0.796527	rattus
ENSRNOG00000039448	10116.ENSRNOP00000057200	OL	0	0	0	0	-	-	-	-	-	-	-	-	-	-	-	-	rattus
Olr1077	10116.ENSRNOP00000057194	OL	0	0	0	0	NOG150292	olfactory receptor Olr1077	-	-	-	-	111	21	5.28571	0.44183	0.192178	0.807822	rattus
Olr1079	10116.ENSRNOP00000051359	OL	0	0	0	0	-	-	-	-	-	-	-	-	-	-	-	-	rattus
ENSRNOG00000015909	10116.ENSRNOP00000021296	OL	0	0	0	0	NOG87840	olfactory receptor Olr108	-	-	-	-	7	5	1.4	0.24044	0.203209	0.796791	rattus
ENSRNOG00000039444	10116.ENSRNOP00000057189	OL	0	0	0	0	-	-	-	-	-	-	-	-	-	-	-	-	rattus
ENSRNOG00000032228	10116.ENSRNOP00000042583	OL	0	0	0	0	-	-	-	-	-	-	-	-	-	-	-	-	rattus
Olr1083	10116.ENSRNOP00000043181	OL	0	0	0	0	-	-	-	-	-	-	-	-	-	-	-	-	rattus
ENSRNOG00000030739	10116.ENSRNOP00000040176	OL	0	0	0	0	NOG146637	annotation not available	-	-	-	-	14	8	1.75	0.28373	0.21448	0.78552	rattus
Olr1085	10116.ENSRNOP00000048409	OL	0	0	0	0	-	-	-	-	-	-	-	-	-	-	-	-	rattus
ENSRNOG00000007348	10116.ENSRNOP00000009615	OL	289	1	2895329	0.9972	NOG44361	olfactory receptor Olr1087	-	-	-	-	10	8	1.25	0.31421	0.281038	0.718962	rattus
ENSRNOG00000015919	10116.ENSRNOP00000021304	OL	0	0	0	0	NOG147123	olfactory receptor Olr109	-	-	-	-	10	8	1.25	0.30609	0.273775	0.726225	rattus
Olr1082	10116.ENSRNOP00000049068	OL	0	0	0	0	-	-	-	-	-	-	-	-	-	-	-	-	rattus
ENSRNOG00000026395	10116.ENSRNOP00000056921	OL	289	1	2895329	0.9972	NOG79272	olfactory receptor Olr1091	-	-	-	-	37	15	2.46667	0.39704	0.252801	0.747199	rattus
ENSRNOG00000033049	10116.ENSRNOP00000049724	OL	289	1	2895329	0.9972	NOG79272	olfactory receptor Olr1092	-	-	-	-	37	15	2.46667	0.39704	0.252801	0.747199	rattus
ENSRNOG00000024877	10116.ENSRNOP00000036046	OL	289	1	2895329	0.9972	NOG145556	annotation not available	-	-	-	-	6	6	1	0.27798	0.27798	0.72202	rattus
ENSRNOG00000031289	10116.ENSRNOP00000049679	OL	289	1	2895329	0.9972	NOG79272	olfactory receptor Olr1095	-	-	-	-	37	15	2.46667	0.39704	0.252801	0.747199	rattus
ENSRNOG00000014386	10116.ENSRNOP00000019271	OL	289	1	2895329	0.9972	NOG79224	olfactory receptor Olr1096	-	-	-	-	27	19	1.42105	0.43662	0.366268	0.633732	rattus
ENSRNOG00000032046	10116.ENSRNOP00000039599	OL	0	0	0	0	NOG74246	olfactory receptor Olr11	-	-	-	-	37	17	2.17647	0.4003	0.271337	0.728663	rattus
ENSRNOG00000015924	10116.ENSRNOP00000021307	OL	0	0	0	0	NOG69010	olfactory receptor Olr110	-	-	-	-	31	17	1.82353	0.41651	0.308439	0.691561	rattus
ENSRNOG00000029831	10116.ENSRNOP00000052440	OL	289	1	2895329	0.9972	NOG45259	annotation not available	-	-	-	-	23	14	1.64286	0.3917	0.3056	0.6944	rattus
ENSRNOG00000031284	10116.ENSRNOP00000045455	OL	0	0	0	0	NOG77860	olfactory receptor Olr1104	-	-	-	-	51	17	3	0.38451	0.221997	0.778003	rattus
ENSRNOG00000032139	10116.ENSRNOP00000045463	OL	0	0	0	0	NOG43500	olfactory receptor Olr1061	-	-	-	-	8	4	2	0.20492	0.1449	0.8551	rattus
ENSRNOG00000033022	10116.ENSRNOP00000052428	OL	0	0	0	0	NOG44625	olfactory receptor Olr1106	-	-	-	-	8	7	1.14286	0.29572	0.27662	0.72338	rattus
Olr1107	10116.ENSRNOP00000052423	OL	0	0	0	0	NOG79435	olfactory receptor Olr1107	-	-	-	-	7	6	1.16667	0.27117	0.251054	0.748946	rattus
Olr1108	10116.ENSRNOP00000052418	OL	0	0	0	0	-	-	-	-	-	-	-	-	-	-	-	-	rattus
ENSRNOG00000015926	10116.ENSRNOP00000021316	OL	0	0	0	0	NOG151040	olfactory receptor Olr111	-	-	-	-	12	9	1.33333	0.33174	0.287296	0.712704	rattus
ENSRNOG00000031503	10116.ENSRNOP00000045931	OL	0	0	0	0	NOG47967	olfactory receptor Olr1111	-	-	-	-	18	10	1.8	0.32675	0.243545	0.756455	rattus
ENSRNOG00000033766	10116.ENSRNOP00000040197	OL	0	0	0	0	NOG80984	olfactory receptor Olr1115	-	-	-	-	58	9	6.44444	0.22391	0.0882025	0.911797	rattus
ENSRNOG00000032839	10116.ENSRNOP00000039463	OL	0	0	0	0	NOG147196	olfactory receptor Olr1105	-	-	-	-	5	5	1	0.24969	0.24969	0.75031	rattus
ENSRNOG00000030856	10116.ENSRNOP00000049941	OL	0	0	0	0	NOG80984	olfactory receptor Olr1118	-	-	-	-	58	9	6.44444	0.22391	0.0882025	0.911797	rattus
ENSRNOG00000034283	10116.ENSRNOP00000047464	OL	0	0	0	0	-	-	-	-	-	-	-	-	-	-	-	-	rattus
ENSRNOG00000015933	10116.ENSRNOP00000021324	OL	0	0	0	0	NOG69010	olfactory receptor Olr112	-	-	-	-	31	17	1.82353	0.41651	0.308439	0.691561	rattus
ENSRNOG00000006428	10116.ENSRNOP00000008415	OL	289	1	2895329	0.9972	NOG146353	olfactory receptor Olr1121	-	-	-	-	16	14	1.14286	0.40326	0.377215	0.622785	rattus
ENSRNOG00000006439	10116.ENSRNOP00000008423	OL	0	0	0	0	NOG80984	olfactory receptor Olr1122	-	-	-	-	58	9	6.44444	0.22391	0.0882025	0.911797	rattus
ENSRNOG00000030080	10116.ENSRNOP00000042413	OL	0	0	0	0	-	-	-	-	-	-	-	-	-	-	-	-	rattus
ENSRNOG00000026489	10116.ENSRNOP00000030252	OL	289	1	2895329	0.9972	NOG128713	olfactory receptor Olr1125	-	-	-	-	48	11	4.36364	0.33374	0.159766	0.840234	rattus
ENSRNOG00000030845	10116.ENSRNOP00000058043	OL	289	1	2895329	0.9972	-	-	-	-	-	-	-	-	-	-	-	-	rattus
ENSRNOG00000029054	10116.ENSRNOP00000051313	OL	0	0	0	0	NOG80984	olfactory receptor Olr1128	-	-	-	-	58	9	6.44444	0.22391	0.0882025	0.911797	rattus
ENSRNOG00000039922	10116.ENSRNOP00000058039	OL	0	0	0	0	-	-	-	-	-	-	-	-	-	-	-	-	rattus
ENSRNOG00000015940	10116.ENSRNOP00000021334	OL	0	0	0	0	NOG148145	olfactory receptor Olr113	-	-	-	-	55	21	2.61905	0.44423	0.274496	0.725504	rattus
ENSRNOG00000039921	10116.ENSRNOP00000058038	OL	0	0	0	0	-	-	-	-	-	-	-	-	-	-	-	-	rattus
ENSRNOG00000039919	10116.ENSRNOP00000058036	OL	0	0	0	0	NOG80984	olfactory receptor Olr1132	-	-	-	-	58	9	6.44444	0.22391	0.0882025	0.911797	rattus
ENSRNOG00000030603	10116.ENSRNOP00000048387	OL	0	0	0	0	NOG80984	olfactory receptor Olr1135	-	-	-	-	58	9	6.44444	0.22391	0.0882025	0.911797	rattus
ENSRNOG00000033500	10116.ENSRNOP00000042208	OL	0	0	0	0	-	-	-	-	-	-	-	-	-	-	-	-	rattus
ENSRNOG00000030952	10116.ENSRNOP00000048884	OL	0	0	0	0	-	-	-	-	-	-	-	-	-	-	-	-	rattus
ENSRNOG00000026354	10116.ENSRNOP00000033351	OL	0	0	0	0	NOG128713	olfactory receptor Olr1139	-	-	-	-	48	11	4.36364	0.33374	0.159766	0.840234	rattus
ENSRNOG00000032466	10116.ENSRNOP00000040714	OL	0	0	0	0	NOG80984	olfactory receptor Olr1117	-	-	-	-	58	9	6.44444	0.22391	0.0882025	0.911797	rattus
ENSRNOG00000028914	10116.ENSRNOP00000048285	OL	0	0	0	0	-	-	-	-	-	-	-	-	-	-	-	-	rattus
ENSRNOG00000032357	10116.ENSRNOP00000043696	OL	289	1	2895329	0.9972	NOG148145	olfactory receptor Olr114	-	-	-	-	55	21	2.61905	0.44423	0.274496	0.725504	rattus
ENSRNOG00000030753	10116.ENSRNOP00000040651	OL	0	0	0	0	NOG128713	olfactory receptor Olr1144	-	-	-	-	48	11	4.36364	0.33374	0.159766	0.840234	rattus
Olr1145	10116.ENSRNOP00000058028	OL	0	0	0	0	NOG128713	Putative gustatory receptor clone PTE03 (Fragment); Possible taste receptor	-	-	-	-	48	11	4.36364	0.33374	0.159766	0.840234	rattus
ENSRNOG00000026354	10116.ENSRNOP00000033351	OL	0	0	0	0	NOG128713	olfactory receptor Olr1139	-	-	-	-	48	11	4.36364	0.33374	0.159766	0.840234	rattus
ENSRNOG00000006577	10116.ENSRNOP00000008595	OL	0	0	0	0	NOG80984	olfactory receptor Olr1147	-	-	-	-	58	9	6.44444	0.22391	0.0882025	0.911797	rattus
ENSRNOG00000006584	10116.ENSRNOP00000008605	OL	0	0	0	0	NOG80984	olfactory receptor Olr1148	-	-	-	-	58	9	6.44444	0.22391	0.0882025	0.911797	rattus
ENSRNOG00000030368	10116.ENSRNOP00000044653	OL	289	1	2895329	0.9972	NOG128713	olfactory receptor Olr1149	-	-	-	-	48	11	4.36364	0.33374	0.159766	0.840234	rattus
ENSRNOG00000031857	10116.ENSRNOP00000045147	OL	0	0	0	0	-	-	-	-	-	-	-	-	-	-	-	-	rattus
ENSRNOG00000033287	10116.ENSRNOP00000040034	OL	0	0	0	0	NOG128713	olfactory receptor Olr1151	-	-	-	-	48	11	4.36364	0.33374	0.159766	0.840234	rattus
ENSRNOG00000031878	10116.ENSRNOP00000040410	OL	0	0	0	0	NOG125273	olfactory receptor Olr115	-	-	-	-	19	8	2.375	0.29256	0.189838	0.810162	rattus
ENSRNOG00000029802	10116.ENSRNOP00000039215	OL	0	0	0	0	NOG145134	olfactory receptor Olr1156	-	-	-	-	4	3	1.33333	0.1613	0.13969	0.86031	rattus
ENSRNOG00000026232	10116.ENSRNOP00000034510	OL	0	0	0	0	NOG149901	olfactory receptor Olr1158	-	-	-	-	3	3	1	0.17044	0.17044	0.82956	rattus
ENSRNOG00000029896	10116.ENSRNOP00000042989	OL	0	0	0	0	NOG46199	olfactory receptor Olr1160	-	-	-	-	58	12	4.83333	0.34704	0.157854	0.842146	rattus
ENSRNOG00000033982	10116.ENSRNOP00000048976	OL	0	0	0	0	NOG46199	olfactory receptor Olr1159	-	-	-	-	58	12	4.83333	0.34704	0.157854	0.842146	rattus
ENSRNOG00000030569	10116.ENSRNOP00000051324	OL	0	0	0	0	NOG150292	olfactory receptor Olr1163	-	-	-	-	111	21	5.28571	0.44183	0.192178	0.807822	rattus
ENSRNOG00000031235	10116.ENSRNOP00000039781	OL	0	0	0	0	NOG46199	olfactory receptor Olr1165	-	-	-	-	58	12	4.83333	0.34704	0.157854	0.842146	rattus
ENSRNOG00000031548	10116.ENSRNOP00000043669	OL	0	0	0	0	NOG44891	olfactory receptor Olr1166	-	-	-	-	40	10	4	0.20946	0.10473	0.89527	rattus
ENSRNOG00000032512	10116.ENSRNOP00000046681	OL	289	1	2895329	0.9972	NOG128713	olfactory receptor Olr1155	-	-	-	-	48	11	4.36364	0.33374	0.159766	0.840234	rattus
ENSRNOG00000033493	10116.ENSRNOP00000041811	OL	0	0	0	0	NOG44891	olfactory receptor Olr1171	-	-	-	-	40	10	4	0.20946	0.10473	0.89527	rattus
ENSRNOG00000029271	10116.ENSRNOP00000049577	OL	0	0	0	0	NOG150292	olfactory receptor Olr1172	-	-	-	-	111	21	5.28571	0.44183	0.192178	0.807822	rattus
Olr1174	10116.ENSRNOP00000047732	OL	0	0	0	0	NOG150292	Olfactory receptor 1174 (Putative gustatory receptor PTE33); Possible taste receptor	-	-	-	-	111	21	5.28571	0.44183	0.192178	0.807822	rattus
ENSRNOG00000031863	10116.ENSRNOP00000045059	OL	0	0	0	0	NOG46199	olfactory receptor Olr1169	-	-	-	-	58	12	4.83333	0.34704	0.157854	0.842146	rattus
ENSRNOG00000033150	10116.ENSRNOP00000048842	OL	0	0	0	0	-	-	-	-	-	-	-	-	-	-	-	-	rattus
ENSRNOG00000039892	10116.ENSRNOP00000057983	OL	0	0	0	0	NOG46199	olfactory receptor Olr1185	-	-	-	-	58	12	4.83333	0.34704	0.157854	0.842146	rattus
ENSRNOG00000030613	10116.ENSRNOP00000043766	OL	289	1	2895329	0.9972	NOG150292	olfactory receptor Olr1186	-	-	-	-	111	21	5.28571	0.44183	0.192178	0.807822	rattus
ENSRNOG00000033350	10116.ENSRNOP00000042005	OL	0	0	0	0	NOG42936	olfactory receptor Olr119	-	-	-	-	52	19	2.73684	0.43289	0.261669	0.738331	rattus
ENSRNOG00000033025	10116.ENSRNOP00000046756	OL	0	0	0	0	NOG151150	olfactory receptor Olr1192	-	-	-	-	7	6	1.16667	0.27117	0.251054	0.748946	rattus
ENSRNOG00000033151	10116.ENSRNOP00000049209	OL	289	1	2895329	0.9972	NOG145371	olfactory receptor Olr1194	-	-	-	-	23	14	1.64286	0.37653	0.293764	0.706236	rattus
ENSRNOG00000030895	10116.ENSRNOP00000039551	OL	289	1	2895329	0.9972	NOG145371	olfactory receptor Olr1195	-	-	-	-	23	14	1.64286	0.37653	0.293764	0.706236	rattus
ENSRNOG00000029715	10116.ENSRNOP00000045461	OL	289	1	2895329	0.9972	NOG44152	olfactory receptor Olr1196	-	-	-	-	39	17	2.29412	0.41746	0.275618	0.724382	rattus
ENSRNOG00000029319	10116.ENSRNOP00000044950	OL	0	0	0	0	NOG44152	olfactory receptor Olr1197	-	-	-	-	39	17	2.29412	0.41746	0.275618	0.724382	rattus
ENSRNOG00000029319	10116.ENSRNOP00000044950	OL	0	0	0	0	NOG44152	olfactory receptor Olr1197	-	-	-	-	39	17	2.29412	0.41746	0.275618	0.724382	rattus
ENSRNOG00000033042	10116.ENSRNOP00000044208	OL	0	0	0	0	NOG44152	olfactory receptor 1198 (predicted) (Olr1198_predicted), mRNA	-	-	-	-	39	17	2.29412	0.41746	0.275618	0.724382	rattus
ENSRNOG00000033042	10116.ENSRNOP00000044208	OL	0	0	0	0	NOG44152	olfactory receptor 1198 (predicted) (Olr1198_predicted), mRNA	-	-	-	-	39	17	2.29412	0.41746	0.275618	0.724382	rattus
ENSRNOG00000011563	10116.ENSRNOP00000015369	OL	0	0	0	0	NOG44152	olfactory receptor Olr1199	-	-	-	-	39	17	2.29412	0.41746	0.275618	0.724382	rattus
ENSRNOG00000033009	10116.ENSRNOP00000050244	OL	0	0	0	0	NOG83434	olfactory receptor Olr12	-	-	-	-	23	13	1.76923	0.373	0.280425	0.719575	rattus
ENSRNOG00000031550	10116.ENSRNOP00000049692	OL	289	1	2895329	0.9972	NOG148145	olfactory receptor Olr120	-	-	-	-	55	21	2.61905	0.44423	0.274496	0.725504	rattus
ENSRNOG00000030265	10116.ENSRNOP00000050864	OL	0	0	0	0	NOG76188	olfactory receptor Olr1200	-	-	-	-	6	6	1	0.27798	0.27798	0.72202	rattus
ENSRNOG00000033539	10116.ENSRNOP00000044142	OL	289	1	2895329	0.9972	NOG44152	olfactory receptor Olr1201	-	-	-	-	39	17	2.29412	0.41746	0.275618	0.724382	rattus
ENSRNOG00000032787	10116.ENSRNOP00000039490	OL	0	0	0	0	NOG44891	olfactory receptor Olr1177	-	-	-	-	40	10	4	0.20946	0.10473	0.89527	rattus
ENSRNOG00000031123	10116.ENSRNOP00000044838	OL	0	0	0	0	NOG76317	olfactory receptor Olr1203	-	-	-	-	39	10	3.9	0.30088	0.152357	0.847643	rattus
ENSRNOG00000030103	10116.ENSRNOP00000041953	OL	0	0	0	0	NOG76317	olfactory receptor Olr1204	-	-	-	-	39	10	3.9	0.30088	0.152357	0.847643	rattus
ENSRNOG00000031451	10116.ENSRNOP00000047863	OL	0	0	0	0	NOG76317	olfactory receptor Olr1206	-	-	-	-	39	10	3.9	0.30088	0.152357	0.847643	rattus
ENSRNOG00000030395	10116.ENSRNOP00000051204	OL	0	0	0	0	NOG125273	olfactory receptor Olr121	-	-	-	-	19	8	2.375	0.29256	0.189838	0.810162	rattus
ENSRNOG00000030794	10116.ENSRNOP00000042998	OL	0	0	0	0	NOG76317	olfactory receptor Olr1213	-	-	-	-	39	10	3.9	0.30088	0.152357	0.847643	rattus
ENSRNOG00000031929	10116.ENSRNOP00000049975	OL	289	1	2895329	0.9972	NOG75803	olfactory receptor Olr1202	-	-	-	-	14	13	1.07692	0.39407	0.379736	0.620264	rattus
ENSRNOG00000034113	10116.ENSRNOP00000041159	OL	0	0	0	0	NOG76317	olfactory receptor Olr1217	-	-	-	-	39	10	3.9	0.30088	0.152357	0.847643	rattus
ENSRNOG00000032483	10116.ENSRNOP00000042306	OL	0	0	0	0	NOG76317	olfactory receptor Olr1214	-	-	-	-	39	10	3.9	0.30088	0.152357	0.847643	rattus
ENSRNOG00000031105	10116.ENSRNOP00000047714	OL	0	0	0	0	-	-	-	-	-	-	-	-	-	-	-	-	rattus
ENSRNOG00000029978	10116.ENSRNOP00000046309	OL	0	0	0	0	NOG86443	olfactory receptor Olr122	-	-	-	-	95	21	4.52381	0.43317	0.20366	0.79634	rattus
ENSRNOG00000031467	10116.ENSRNOP00000040436	OL	0	0	0	0	-	-	-	-	-	-	-	-	-	-	-	-	rattus
ENSRNOG00000030341	10116.ENSRNOP00000042474	OL	0	0	0	0	NOG68623	olfactory receptor Olr1222	-	-	-	-	15	5	3	0.18693	0.107924	0.892076	rattus
ENSRNOG00000032867	10116.ENSRNOP00000041702	OL	0	0	0	0	-	-	-	-	-	-	-	-	-	-	-	-	rattus
Olr1226	10116.ENSRNOP00000041367	OL	0	0	0	0	-	-	-	-	-	-	-	-	-	-	-	-	rattus
ENSRNOG00000030112	10116.ENSRNOP00000043602	OL	0	0	0	0	-	-	-	-	-	-	-	-	-	-	-	-	rattus
ENSRNOG00000032974	10116.ENSRNOP00000045749	OL	0	0	0	0	-	-	-	-	-	-	-	-	-	-	-	-	rattus
ENSRNOG00000030403	10116.ENSRNOP00000041311	OL	0	0	0	0	-	-	-	-	-	-	-	-	-	-	-	-	rattus
ENSRNOG00000033334	10116.ENSRNOP00000046516	OL	0	0	0	0	-	-	-	-	-	-	-	-	-	-	-	-	rattus
ENSRNOG00000029086	10116.ENSRNOP00000050333	OL	289	1	2895329	0.9972	NOG44371	olfactory receptor Olr1231	-	-	-	-	90	16	5.625	0.35322	0.148931	0.851069	rattus
ENSRNOG00000029540	10116.ENSRNOP00000044398	OL	0	0	0	0	NOG44371	olfactory receptor Olr1232	-	-	-	-	90	16	5.625	0.35322	0.148931	0.851069	rattus
ENSRNOG00000031241	10116.ENSRNOP00000048202	OL	0	0	0	0	-	-	-	-	-	-	-	-	-	-	-	-	rattus
ENSRNOG00000034165	10116.ENSRNOP00000048594	OL	0	0	0	0	-	-	-	-	-	-	-	-	-	-	-	-	rattus
ENSRNOG00000029246	10116.ENSRNOP00000041806	OL	289	1	2895329	0.9972	NOG44371	olfactory receptor Olr1235	-	-	-	-	90	16	5.625	0.35322	0.148931	0.851069	rattus
ENSRNOG00000025356	10116.ENSRNOP00000032072	OL	0	0	0	0	NOG76317	olfactory receptor Olr1236	-	-	-	-	39	10	3.9	0.30088	0.152357	0.847643	rattus
ENSRNOG00000029053	10116.ENSRNOP00000050466	OL	0	0	0	0	NOG44371	olfactory receptor Olr1237	-	-	-	-	90	16	5.625	0.35322	0.148931	0.851069	rattus
ENSRNOG00000029351	10116.ENSRNOP00000049672	OL	0	0	0	0	NOG44371	olfactory receptor Olr1238	-	-	-	-	90	16	5.625	0.35322	0.148931	0.851069	rattus
ENSRNOG00000031192	10116.ENSRNOP00000048770	OL	0	0	0	0	NOG44371	olfactory receptor Olr1239	-	-	-	-	90	16	5.625	0.35322	0.148931	0.851069	rattus
ENSRNOG00000016018	10116.ENSRNOP00000021429	OL	0	0	0	0	NOG125273	olfactory receptor Olr124	-	-	-	-	19	8	2.375	0.29256	0.189838	0.810162	rattus
ENSRNOG00000034072	10116.ENSRNOP00000049603	OL	0	0	0	0	NOG44371	olfactory receptor Olr1240	-	-	-	-	90	16	5.625	0.35322	0.148931	0.851069	rattus
ENSRNOG00000031722	10116.ENSRNOP00000047481	OL	0	0	0	0	NOG44371	olfactory receptor Olr1241	-	-	-	-	90	16	5.625	0.35322	0.148931	0.851069	rattus
ENSRNOG00000031909	10116.ENSRNOP00000040975	OL	0	0	0	0	NOG76317	olfactory receptor Olr1218	-	-	-	-	39	10	3.9	0.30088	0.152357	0.847643	rattus
ENSRNOG00000032313	10116.ENSRNOP00000045540	OL	0	0	0	0	NOG44371	olfactory receptor Olr1242	-	-	-	-	90	16	5.625	0.35322	0.148931	0.851069	rattus
ENSRNOG00000030076	10116.ENSRNOP00000046436	OL	0	0	0	0	NOG44371	olfactory receptor Olr1244	-	-	-	-	90	16	5.625	0.35322	0.148931	0.851069	rattus
ENSRNOG00000029002	10116.ENSRNOP00000049405	OL	0	0	0	0	NOG44371	olfactory receptor Olr1245	-	-	-	-	90	16	5.625	0.35322	0.148931	0.851069	rattus
ENSRNOG00000030728	10116.ENSRNOP00000043150	OL	0	0	0	0	NOG44371	olfactory receptor 1249 (predicted) (Olr1249_predicted), mRNA	-	-	-	-	90	16	5.625	0.35322	0.148931	0.851069	rattus
ENSRNOG00000030728	10116.ENSRNOP00000043150	OL	0	0	0	0	NOG44371	olfactory receptor 1249 (predicted) (Olr1249_predicted), mRNA	-	-	-	-	90	16	5.625	0.35322	0.148931	0.851069	rattus
ENSRNOG00000030728	10116.ENSRNOP00000043150	OL	0	0	0	0	NOG44371	olfactory receptor 1249 (predicted) (Olr1249_predicted), mRNA	-	-	-	-	90	16	5.625	0.35322	0.148931	0.851069	rattus
ENSRNOG00000033753	10116.ENSRNOP00000049026	OL	0	0	0	0	NOG44371	olfactory receptor Olr1247	-	-	-	-	90	16	5.625	0.35322	0.148931	0.851069	rattus
ENSRNOG00000016027	10116.ENSRNOP00000021436	OL	0	0	0	0	NOG71954	olfactory receptor Olr125	-	-	-	-	15	10	1.5	0.34844	0.2845	0.7155	rattus
ENSRNOG00000030996	10116.ENSRNOP00000041022	OL	0	0	0	0	NOG44371	olfactory receptor Olr1250	-	-	-	-	90	16	5.625	0.35322	0.148931	0.851069	rattus
ENSRNOG00000029208	10116.ENSRNOP00000056896	OL	0	0	0	0	NOG44371	olfactory receptor Olr1251	-	-	-	-	90	16	5.625	0.35322	0.148931	0.851069	rattus
ENSRNOG00000034224	10116.ENSRNOP00000042335	OL	0	0	0	0	NOG44371	olfactory receptor Olr1252	-	-	-	-	90	16	5.625	0.35322	0.148931	0.851069	rattus
ENSRNOG00000033416	10116.ENSRNOP00000044994	OL	0	0	0	0	NOG44371	olfactory receptor Olr1253	-	-	-	-	90	16	5.625	0.35322	0.148931	0.851069	rattus
ENSRNOG00000029251	10116.ENSRNOP00000042389	OL	0	0	0	0	NOG44371	olfactory receptor Olr1254	-	-	-	-	90	16	5.625	0.35322	0.148931	0.851069	rattus
ENSRNOG00000030953	10116.ENSRNOP00000051183	OL	0	0	0	0	NOG44371	olfactory receptor Olr1256	-	-	-	-	90	16	5.625	0.35322	0.148931	0.851069	rattus
ENSRNOG00000029338	10116.ENSRNOP00000044452	OL	0	0	0	0	NOG124373	olfactory receptor Olr1257	-	-	-	-	97	20	4.85	0.3752	0.17037	0.82963	rattus
ENSRNOG00000032654	10116.ENSRNOP00000045077	OL	0	0	0	0	NOG44371	olfactory receptor Olr1243	-	-	-	-	90	16	5.625	0.35322	0.148931	0.851069	rattus
ENSRNOG00000029612	10116.ENSRNOP00000050751	OL	289	1	2895329	0.9972	NOG86443	olfactory receptor Olr126	-	-	-	-	95	21	4.52381	0.43317	0.20366	0.79634	rattus
ENSRNOG00000028952	10116.ENSRNOP00000047145	OL	0	0	0	0	NOG44371	olfactory receptor Olr1260	-	-	-	-	90	16	5.625	0.35322	0.148931	0.851069	rattus
ENSRNOG00000030427	10116.ENSRNOP00000043809	OL	0	0	0	0	NOG44371	olfactory receptor Olr1261	-	-	-	-	90	16	5.625	0.35322	0.148931	0.851069	rattus
ENSRNOG00000033012	10116.ENSRNOP00000039083	OL	0	0	0	0	NOG44371	olfactory receptor Olr1262	-	-	-	-	90	16	5.625	0.35322	0.148931	0.851069	rattus
ENSRNOG00000030000	10116.ENSRNOP00000051536	OL	0	0	0	0	NOG151154	olfactory receptor Olr1264	-	-	-	-	5	4	1.25	0.20668	0.18486	0.81514	rattus
ENSRNOG00000031423	10116.ENSRNOP00000043172	OL	0	0	0	0	NOG44371	olfactory receptor Olr1265	-	-	-	-	90	16	5.625	0.35322	0.148931	0.851069	rattus
ENSRNOG00000031054	10116.ENSRNOP00000044756	OL	0	0	0	0	NOG44371	olfactory receptor Olr1266	-	-	-	-	90	16	5.625	0.35322	0.148931	0.851069	rattus
ENSRNOG00000034039	10116.ENSRNOP00000039523	OL	289	1	2895329	0.9972	NOG86443	olfactory receptor Olr127	-	-	-	-	95	21	4.52381	0.43317	0.20366	0.79634	rattus
Olr1271	10116.ENSRNOP00000016117	OL	289	1	2895329	0.9972	NOG44891	olfactory receptor Olr1271	-	-	-	-	40	10	4	0.20946	0.10473	0.89527	rattus
Olr1271	10116.ENSRNOP00000016117	OL	289	1	2895329	0.9972	NOG44891	olfactory receptor Olr1271	-	-	-	-	40	10	4	0.20946	0.10473	0.89527	rattus
ENSRNOG00000012139	10116.ENSRNOP00000016170	OL	0	0	0	0	NOG87115	olfactory receptor Olr1273	-	-	-	-	26	17	1.52941	0.42477	0.343472	0.656528	rattus
ENSRNOG00000032383	10116.ENSRNOP00000050487	OL	0	0	0	0	NOG44371	olfactory receptor Olr1259	-	-	-	-	90	16	5.625	0.35322	0.148931	0.851069	rattus
ENSRNOG00000030498	10116.ENSRNOP00000049183	OL	0	0	0	0	NOG124373	olfactory receptor Olr1275	-	-	-	-	97	20	4.85	0.3752	0.17037	0.82963	rattus
Olr1278	10116.ENSRNOP00000007560	OL	0	0	0	0	NOG124373	olfactory receptor Olr1278	-	-	-	-	97	20	4.85	0.3752	0.17037	0.82963	rattus
ENSRNOG00000016052	10116.ENSRNOP00000021468	OL	0	0	0	0	NOG69010	olfactory receptor Olr128	-	-	-	-	31	17	1.82353	0.41651	0.308439	0.691561	rattus
ENSRNOG00000032751	10116.ENSRNOP00000048133	OL	0	0	0	0	NOG124373	olfactory receptor Olr1274	-	-	-	-	97	20	4.85	0.3752	0.17037	0.82963	rattus
ENSRNOG00000032904	10116.ENSRNOP00000051051	OL	0	0	0	0	NOG124373	olfactory receptor Olr1285	-	-	-	-	97	20	4.85	0.3752	0.17037	0.82963	rattus
Olr1280	10116.ENSRNOP00000047419	OL	0	0	0	0	NOG124373	olfactory receptor Olr1280	-	-	-	-	97	20	4.85	0.3752	0.17037	0.82963	rattus
ENSRNOG00000032619	10116.ENSRNOP00000042893	OL	0	0	0	0	NOG47818	olfactory receptor Olr1286	-	-	-	-	32	8	4	0.30624	0.15312	0.84688	rattus
ENSRNOG00000025163	10116.ENSRNOP00000031107	OL	289	1	2895329	0.9972	NOG42936	olfactory receptor Olr129	-	-	-	-	52	19	2.73684	0.43289	0.261669	0.738331	rattus
ENSRNOG00000024783	10116.ENSRNOP00000035666	OL	0	0	0	0	NOG47818	olfactory receptor Olr1291	-	-	-	-	32	8	4	0.30624	0.15312	0.84688	rattus
ENSRNOG00000030512	10116.ENSRNOP00000043374	OL	0	0	0	0	-	-	-	-	-	-	-	-	-	-	-	-	rattus
ENSRNOG00000033008	10116.ENSRNOP00000040324	OL	0	0	0	0	NOG47818	olfactory receptor Olr1293	-	-	-	-	32	8	4	0.30624	0.15312	0.84688	rattus
ENSRNOG00000031526	10116.ENSRNOP00000050222	OL	0	0	0	0	NOG47818	olfactory receptor Olr1295	-	-	-	-	32	8	4	0.30624	0.15312	0.84688	rattus
ENSRNOG00000005870	10116.ENSRNOP00000007684	OL	0	0	0	0	NOG124373	olfactory receptor Olr1297	-	-	-	-	97	20	4.85	0.3752	0.17037	0.82963	rattus
ENSRNOG00000032318	10116.ENSRNOP00000040595	OL	0	0	0	0	NOG47818	olfactory receptor Olr1288	-	-	-	-	32	8	4	0.30624	0.15312	0.84688	rattus
ENSRNOG00000032371	10116.ENSRNOP00000039235	OL	289	1	2895329	0.9972	NOG146470	olfactory receptor Olr13	-	-	-	-	20	14	1.42857	0.39618	0.331468	0.668532	rattus
ENSRNOG00000039245	10116.ENSRNOP00000056854	OL	0	0	0	0	NOG124373	olfactory receptor Olr1301	-	-	-	-	97	20	4.85	0.3752	0.17037	0.82963	rattus
ENSRNOG00000039244	10116.ENSRNOP00000056849	OL	0	0	0	0	NOG124373	olfactory receptor Olr1302	-	-	-	-	97	20	4.85	0.3752	0.17037	0.82963	rattus
ENSRNOG00000039242	10116.ENSRNOP00000056848	OL	0	0	0	0	NOG124373	olfactory receptor Olr1303	-	-	-	-	97	20	4.85	0.3752	0.17037	0.82963	rattus
ENSRNOG00000039239	10116.ENSRNOP00000056844	OL	0	0	0	0	NOG124373	olfactory receptor Olr1304	-	-	-	-	97	20	4.85	0.3752	0.17037	0.82963	rattus
ENSRNOG00000039238	10116.ENSRNOP00000056843	OL	0	0	0	0	NOG124373	olfactory receptor Olr1305	-	-	-	-	97	20	4.85	0.3752	0.17037	0.82963	rattus
ENSRNOG00000039236	10116.ENSRNOP00000056842	OL	0	0	0	0	NOG115464	olfactory receptor Olr1306	-	-	-	-	12	11	1.09091	0.36759	0.35194	0.64806	rattus
Olr1307	10116.ENSRNOP00000056841	OL	0	0	0	0	NOG87115	olfactory receptor Olr1307	-	-	-	-	26	17	1.52941	0.42477	0.343472	0.656528	rattus
ENSRNOG00000005997	10116.ENSRNOP00000007862	OL	0	0	0	0	NOG148821	olfactory receptor Olr1308	-	-	-	-	11	6	1.83333	0.2547	0.188109	0.811891	rattus
ENSRNOG00000034153	10116.ENSRNOP00000044667	OL	0	0	0	0	NOG43587	olfactory receptor Olr1309	-	-	-	-	27	13	2.07692	0.34389	0.238622	0.761378	rattus
ENSRNOG00000030179	10116.ENSRNOP00000050796	OL	289	1	2895329	0.9972	NOG42936	olfactory receptor Olr131	-	-	-	-	52	19	2.73684	0.43289	0.261669	0.738331	rattus
ENSRNOG00000029102	10116.ENSRNOP00000051437	OL	0	0	0	0	NOG43587	olfactory receptor Olr1311	-	-	-	-	27	13	2.07692	0.34389	0.238622	0.761378	rattus
ENSRNOG00000031983	10116.ENSRNOP00000049307	OL	289	1	2895329	0.9972	NOG42936	olfactory receptor Olr130	-	-	-	-	52	19	2.73684	0.43289	0.261669	0.738331	rattus
ENSRNOG00000006035	10116.ENSRNOP00000007901	OL	0	0	0	0	NOG148821	olfactory receptor Olr1314	-	-	-	-	11	6	1.83333	0.2547	0.188109	0.811891	rattus
Olr1315	10116.ENSRNOP00000041013	OL	0	0	0	0	NOG87115	olfactory receptor Olr1315	-	-	-	-	26	17	1.52941	0.42477	0.343472	0.656528	rattus
ENSRNOG00000029527	10116.ENSRNOP00000039903	OL	0	0	0	0	NOG124373	olfactory receptor Olr1316	-	-	-	-	97	20	4.85	0.3752	0.17037	0.82963	rattus
ENSRNOG00000032821	10116.ENSRNOP00000045579	OL	0	0	0	0	NOG124373	annotation not available	-	-	-	-	97	20	4.85	0.3752	0.17037	0.82963	rattus
ENSRNOG00000031405	10116.ENSRNOP00000049294	OL	0	0	0	0	NOG124373	olfactory receptor Olr1319	-	-	-	-	97	20	4.85	0.3752	0.17037	0.82963	rattus
ENSRNOG00000029051	10116.ENSRNOP00000044375	OL	289	1	2895329	0.9972	NOG42936	olfactory receptor Olr132	-	-	-	-	52	19	2.73684	0.43289	0.261669	0.738331	rattus
ENSRNOG00000030329	10116.ENSRNOP00000046310	OL	0	0	0	0	NOG124373	olfactory receptor Olr1320	-	-	-	-	97	20	4.85	0.3752	0.17037	0.82963	rattus
ENSRNOG00000032457	10116.ENSRNOP00000056802	OL	0	0	0	0	NOG124373	olfactory receptor Olr1328	-	-	-	-	97	20	4.85	0.3752	0.17037	0.82963	rattus
ENSRNOG00000033179	10116.ENSRNOP00000051367	OL	0	0	0	0	-	-	-	-	-	-	-	-	-	-	-	-	rattus
ENSRNOG00000031942	10116.ENSRNOP00000046861	OL	0	0	0	0	NOG43587	olfactory receptor Olr1313	-	-	-	-	27	13	2.07692	0.34389	0.238622	0.761378	rattus
ENSRNOG00000006173	10116.ENSRNOP00000008086	OL	0	0	0	0	NOG116514	olfactory receptor Olr1329	-	-	-	-	10	7	1.42857	0.29271	0.244899	0.755101	rattus
ENSRNOG00000006183	10116.ENSRNOP00000008096	OL	0	0	0	0	NOG148600	olfactory receptor Olr1330	-	-	-	-	4	4	1	0.21507	0.21507	0.78493	rattus
ENSRNOG00000029113	10116.ENSRNOP00000050478	OL	0	0	0	0	-	-	-	-	-	-	-	-	-	-	-	-	rattus
ENSRNOG00000029468	10116.ENSRNOP00000047636	OL	0	0	0	0	-	-	-	-	-	-	-	-	-	-	-	-	rattus
ENSRNOG00000034213	10116.ENSRNOP00000046973	OL	289	1	2895329	0.9972	NOG41301	olfactory receptor Olr1334	-	-	-	-	37	13	2.84615	0.37586	0.222791	0.777209	rattus
ENSRNOG00000031094	10116.ENSRNOP00000050754	OL	0	0	0	0	NOG41301	olfactory receptor Olr1335	-	-	-	-	37	13	2.84615	0.37586	0.222791	0.777209	rattus
ENSRNOG00000006271	10116.ENSRNOP00000056779	OL	0	0	0	0	NOG76317	olfactory receptor Olr1338	-	-	-	-	39	10	3.9	0.30088	0.152357	0.847643	rattus
ENSRNOG00000029633	10116.ENSRNOP00000046049	OL	289	1	2895329	0.9972	NOG123563	annotation not available	-	-	-	-	23	15	1.53333	0.37788	0.305166	0.694834	rattus
ENSRNOG00000006303	10116.ENSRNOP00000008260	OL	289	1	2895329	0.9972	NOG42217	olfactory receptor Olr1341	-	-	-	-	25	14	1.78571	0.33929	0.253902	0.746098	rattus
ENSRNOG00000033406	10116.ENSRNOP00000043588	OL	0	0	0	0	NOG47186	olfactory receptor Olr1343	-	-	-	-	20	11	1.81818	0.34911	0.258907	0.741093	rattus
ENSRNOG00000033704	10116.ENSRNOP00000041104	OL	0	0	0	0	NOG47186	olfactory receptor Olr1344	-	-	-	-	20	11	1.81818	0.34911	0.258907	0.741093	rattus
ENSRNOG00000034098	10116.ENSRNOP00000044358	OL	289	1	2895329	0.9972	NOG47186	olfactory receptor Olr1345	-	-	-	-	20	11	1.81818	0.34911	0.258907	0.741093	rattus
Olr1346	10116.ENSRNOP00000040929	OL	0	0	0	0	NOG39077	olfactory receptor Olr1346	-	-	-	-	58	7	8.28571	0.25224	0.0876292	0.912371	rattus
ENSRNOG00000032457	10116.ENSRNOP00000056802	OL	0	0	0	0	NOG124373	olfactory receptor Olr1328	-	-	-	-	97	20	4.85	0.3752	0.17037	0.82963	rattus
ENSRNOG00000016546	10116.ENSRNOP00000022152	OL	0	0	0	0	NOG39077	olfactory receptor Olr1349	-	-	-	-	58	7	8.28571	0.25224	0.0876292	0.912371	rattus
ENSRNOG00000030424	10116.ENSRNOP00000042375	OL	0	0	0	0	NOG39077	olfactory receptor Olr1350	-	-	-	-	58	7	8.28571	0.25224	0.0876292	0.912371	rattus
Olr1347	10116.ENSRNOP00000043969	OL	0	0	0	0	NOG39077	olfactory receptor Olr1347	-	-	-	-	58	7	8.28571	0.25224	0.0876292	0.912371	rattus
ENSRNOG00000037404	10116.ENSRNOP00000053441	OL	0	0	0	0	NOG39077	olfactory receptor Olr1352	-	-	-	-	58	7	8.28571	0.25224	0.0876292	0.912371	rattus
ENSRNOG00000037403	10116.ENSRNOP00000053440	OL	0	0	0	0	NOG39077	olfactory receptor Olr1353	-	-	-	-	58	7	8.28571	0.25224	0.0876292	0.912371	rattus
ENSRNOG00000031293	10116.ENSRNOP00000049788	OL	289	1	2895329	0.9972	NOG150110	olfactory receptor Olr1355	-	-	-	-	58	15	3.86667	0.34287	0.174366	0.825634	rattus
Olr1356	10116.ENSRNOP00000057735	OL	289	1	2895329	0.9972	NOG40930	olfactory receptor Olr1356	-	-	-	-	15	11	1.36364	0.35196	0.3014	0.6986	rattus
ENSRNOG00000039758	10116.ENSRNOP00000057706	OL	289	1	2895329	0.9972	NOG150110	olfactory receptor Olr1369	-	-	-	-	58	15	3.86667	0.34287	0.174366	0.825634	rattus
ENSRNOG00000012539	10116.ENSRNOP00000016721	OL	0	0	0	0	NOG43237	annotation not available	-	-	-	-	32	17	1.88235	0.42672	0.311023	0.688977	rattus
Olr1361	10116.ENSRNOP00000004503	OL	289	1	2895329	0.9972	NOG150110	Olfactory receptor 1361 (Olfactory receptor-like protein F5); Odorant receptor (Potential)	-	-	-	-	58	15	3.86667	0.34287	0.174366	0.825634	rattus
Olr1362	10116.ENSRNOP00000057714	OL	289	1	2895329	0.9972	NOG150110	olfactory receptor Olr1362	-	-	-	-	58	15	3.86667	0.34287	0.174366	0.825634	rattus
ENSRNOG00000039764	10116.ENSRNOP00000057713	OL	289	1	2895329	0.9972	NOG150110	olfactory receptor Olr1364	-	-	-	-	58	15	3.86667	0.34287	0.174366	0.825634	rattus
ENSRNOG00000039763	10116.ENSRNOP00000057712	OL	289	1	2895329	0.9972	NOG150110	olfactory receptor Olr1365	-	-	-	-	58	15	3.86667	0.34287	0.174366	0.825634	rattus
Olr1361	10116.ENSRNOP00000004503	OL	289	1	2895329	0.9972	NOG150110	Olfactory receptor 1361 (Olfactory receptor-like protein F5); Odorant receptor (Potential)	-	-	-	-	58	15	3.86667	0.34287	0.174366	0.825634	rattus
ENSRNOG00000039758	10116.ENSRNOP00000057706	OL	289	1	2895329	0.9972	NOG150110	olfactory receptor Olr1369	-	-	-	-	58	15	3.86667	0.34287	0.174366	0.825634	rattus
Olr1361	10116.ENSRNOP00000004503	OL	289	1	2895329	0.9972	NOG150110	Olfactory receptor 1361 (Olfactory receptor-like protein F5); Odorant receptor (Potential)	-	-	-	-	58	15	3.86667	0.34287	0.174366	0.825634	rattus
ENSRNOG00000034041	10116.ENSRNOP00000050330	OL	289	1	2895329	0.9972	NOG46377	olfactory receptor Olr137	-	-	-	-	25	15	1.66667	0.40686	0.315152	0.684848	rattus
Olr1370	10116.ENSRNOP00000057705	OL	289	1	2895329	0.9972	NOG150110	olfactory receptor Olr1370	-	-	-	-	58	15	3.86667	0.34287	0.174366	0.825634	rattus
ENSRNOG00000028799	10116.ENSRNOP00000045283	OL	289	1	2895329	0.9972	NOG150110	olfactory receptor Olr1375	-	-	-	-	58	15	3.86667	0.34287	0.174366	0.825634	rattus
ENSRNOG00000039760	10116.ENSRNOP00000057708	OL	289	1	2895329	0.9972	NOG150110	olfactory receptor Olr1368	-	-	-	-	58	15	3.86667	0.34287	0.174366	0.825634	rattus
ENSRNOG00000028799	10116.ENSRNOP00000045283	OL	289	1	2895329	0.9972	NOG150110	olfactory receptor Olr1375	-	-	-	-	58	15	3.86667	0.34287	0.174366	0.825634	rattus
ENSRNOG00000031740	10116.ENSRNOP00000046848	OL	289	1	2895329	0.9972	NOG150110	olfactory receptor Olr1376	-	-	-	-	58	15	3.86667	0.34287	0.174366	0.825634	rattus
ENSRNOG00000030412	10116.ENSRNOP00000046341	OL	289	1	2895329	0.9972	NOG150110	olfactory receptor Olr1378	-	-	-	-	58	15	3.86667	0.34287	0.174366	0.825634	rattus
ENSRNOG00000032545	10116.ENSRNOP00000044647	OL	0	0	0	0	NOG39077	olfactory receptor Olr1351	-	-	-	-	58	7	8.28571	0.25224	0.0876292	0.912371	rattus
ENSRNOG00000030913	10116.ENSRNOP00000049955	OL	289	1	2895329	0.9972	NOG150110	olfactory receptor Olr1381	-	-	-	-	58	15	3.86667	0.34287	0.174366	0.825634	rattus
ENSRNOG00000039747	10116.ENSRNOP00000057692	OL	289	1	2895329	0.9972	NOG150110	olfactory receptor Olr1382	-	-	-	-	58	15	3.86667	0.34287	0.174366	0.825634	rattus
ENSRNOG00000033094	10116.ENSRNOP00000042980	OL	289	1	2895329	0.9972	NOG39955	olfactory receptor Olr1383	-	-	-	-	19	15	1.26667	0.41153	0.365654	0.634346	rattus
ENSRNOG00000033094	10116.ENSRNOP00000042980	OL	289	1	2895329	0.9972	NOG39955	olfactory receptor Olr1383	-	-	-	-	19	15	1.26667	0.41153	0.365654	0.634346	rattus
ENSRNOG00000033094	10116.ENSRNOP00000042980	OL	289	1	2895329	0.9972	NOG39955	olfactory receptor Olr1383	-	-	-	-	19	15	1.26667	0.41153	0.365654	0.634346	rattus
ENSRNOG00000028885	10116.ENSRNOP00000041808	OL	0	0	0	0	NOG39955	olfactory receptor Olr1386	-	-	-	-	19	15	1.26667	0.41153	0.365654	0.634346	rattus
ENSRNOG00000033170	10116.ENSRNOP00000043913	OL	0	0	0	0	NOG39798	olfactory receptor Olr1387	-	-	-	-	58	16	3.625	0.3336	0.175215	0.824785	rattus
ENSRNOG00000030615	10116.ENSRNOP00000045899	OL	0	0	0	0	NOG39798	olfactory receptor Olr1388	-	-	-	-	58	16	3.625	0.3336	0.175215	0.824785	rattus
ENSRNOG00000029488	10116.ENSRNOP00000039889	OL	0	0	0	0	NOG39798	olfactory receptor Olr1389	-	-	-	-	58	16	3.625	0.3336	0.175215	0.824785	rattus
ENSRNOG00000031147	10116.ENSRNOP00000039188	OL	289	1	2895329	0.9972	NOG46377	olfactory receptor Olr139	-	-	-	-	25	15	1.66667	0.40686	0.315152	0.684848	rattus
ENSRNOG00000030741	10116.ENSRNOP00000050507	OL	0	0	0	0	NOG39798	olfactory receptor Olr1392	-	-	-	-	58	16	3.625	0.3336	0.175215	0.824785	rattus
ENSRNOG00000031116	10116.ENSRNOP00000046614	OL	0	0	0	0	NOG39798	olfactory receptor Olr1393	-	-	-	-	58	16	3.625	0.3336	0.175215	0.824785	rattus
ENSRNOG00000031592	10116.ENSRNOP00000044678	OL	289	1	2895329	0.9972	NOG39798	olfactory receptor Olr1394	-	-	-	-	58	16	3.625	0.3336	0.175215	0.824785	rattus
ENSRNOG00000032842	10116.ENSRNOP00000040183	OL	289	1	2895329	0.9972	NOG150110	olfactory receptor Olr1380	-	-	-	-	58	15	3.86667	0.34287	0.174366	0.825634	rattus
ENSRNOG00000031992	10116.ENSRNOP00000050766	OL	289	1	2895329	0.9972	NOG39798	olfactory receptor Olr1395	-	-	-	-	58	16	3.625	0.3336	0.175215	0.824785	rattus
ENSRNOG00000029739	10116.ENSRNOP00000051543	OL	0	0	0	0	NOG39798	olfactory receptor Olr1397	-	-	-	-	58	16	3.625	0.3336	0.175215	0.824785	rattus
Olr1398	10116.ENSRNOP00000044744	OL	0	0	0	0	NOG39798	olfactory receptor Olr1398	-	-	-	-	58	16	3.625	0.3336	0.175215	0.824785	rattus
ENSRNOG00000034132	10116.ENSRNOP00000041479	OL	0	0	0	0	NOG39798	olfactory receptor Olr1399	-	-	-	-	58	16	3.625	0.3336	0.175215	0.824785	rattus
ENSRNOG00000030565	10116.ENSRNOP00000048210	OL	289	1	2895329	0.9972	NOG132856	olfactory receptor Olr14	-	-	-	-	429	22	19.5	0.30323	0.0686681	0.931332	rattus
ENSRNOG00000029618	10116.ENSRNOP00000046961	OL	289	1	2895329	0.9972	NOG46377	olfactory receptor Olr140	-	-	-	-	25	15	1.66667	0.40686	0.315152	0.684848	rattus
ENSRNOG00000031753	10116.ENSRNOP00000047443	OL	0	0	0	0	NOG39798	olfactory receptor Olr1400	-	-	-	-	58	16	3.625	0.3336	0.175215	0.824785	rattus
ENSRNOG00000033524	10116.ENSRNOP00000042669	OL	0	0	0	0	NOG39798	olfactory receptor Olr1401	-	-	-	-	58	16	3.625	0.3336	0.175215	0.824785	rattus
Olr1404	10116.ENSRNOP00000004865	OL	0	0	0	0	-	-	-	-	-	-	-	-	-	-	-	-	rattus
ENSRNOG00000030975	10116.ENSRNOP00000050082	OL	0	0	0	0	NOG147674	olfactory receptor Olr1405	-	-	-	-	15	10	1.5	0.34303	0.280083	0.719917	rattus
ENSRNOG00000029930	10116.ENSRNOP00000050783	OL	0	0	0	0	-	-	-	-	-	-	-	-	-	-	-	-	rattus
ENSRNOG00000034280	10116.ENSRNOP00000040863	OL	0	0	0	0	NOG147674	olfactory receptor Olr1407	-	-	-	-	15	10	1.5	0.34303	0.280083	0.719917	rattus
ENSRNOG00000030651	10116.ENSRNOP00000046782	OL	0	0	0	0	-	-	-	-	-	-	-	-	-	-	-	-	rattus
ENSRNOG00000030290	10116.ENSRNOP00000040792	OL	0	0	0	0	-	-	-	-	-	-	-	-	-	-	-	-	rattus
ENSRNOG00000016946	10116.ENSRNOP00000022733	OL	0	0	0	0	NOG75946	olfactory receptor Olr141	-	-	-	-	5	4	1.25	0.20668	0.18486	0.81514	rattus
ENSRNOG00000032382	10116.ENSRNOP00000047392	OL	289	1	2895329	0.9972	NOG39798	olfactory receptor Olr1396	-	-	-	-	58	16	3.625	0.3336	0.175215	0.824785	rattus
ENSRNOG00000032864	10116.ENSRNOP00000040909	OL	0	0	0	0	-	-	-	-	-	-	-	-	-	-	-	-	rattus
Olr1413	10116.ENSRNOP00000033671	OL	0	0	0	0	NOG79224	olfactory receptor Olr1413	-	-	-	-	27	19	1.42105	0.43662	0.366268	0.633732	rattus
ENSRNOG00000026714	10116.ENSRNOP00000037309	OL	0	0	0	0	NOG44451	olfactory receptor Olr1414	-	-	-	-	91	19	4.78947	0.422	0.192827	0.807173	rattus
ENSRNOG00000026695	10116.ENSRNOP00000035880	OL	0	0	0	0	NOG44451	olfactory receptor Olr1415	-	-	-	-	91	19	4.78947	0.422	0.192827	0.807173	rattus
ENSRNOG00000030652	10116.ENSRNOP00000045338	OL	0	0	0	0	NOG45249	olfactory receptor Olr1416	-	-	-	-	51	17	3	0.40375	0.233105	0.766895	rattus
ENSRNOG00000032495	10116.ENSRNOP00000042053	OL	0	0	0	0	-	-	-	-	-	-	-	-	-	-	-	-	rattus
ENSRNOG00000029989	10116.ENSRNOP00000041076	OL	0	0	0	0	NOG45249	olfactory receptor Olr1418	-	-	-	-	51	17	3	0.40375	0.233105	0.766895	rattus
ENSRNOG00000016954	10116.ENSRNOP00000022740	OL	289	1	2895329	0.9972	NOG46991	olfactory receptor Olr142	-	-	-	-	25	16	1.5625	0.40686	0.325488	0.674512	rattus
ENSRNOG00000032577	10116.ENSRNOP00000046998	OL	0	0	0	0	NOG45249	olfactory receptor Olr1417	-	-	-	-	51	17	3	0.40375	0.233105	0.766895	rattus
ENSRNOG00000030440	10116.ENSRNOP00000047798	OL	0	0	0	0	NOG45249	olfactory receptor Olr1422	-	-	-	-	51	17	3	0.40375	0.233105	0.766895	rattus
ENSRNOG00000033001	10116.ENSRNOP00000039350	OL	289	1	2895329	0.9972	NOG45249	olfactory receptor Olr1423	-	-	-	-	51	17	3	0.40375	0.233105	0.766895	rattus
ENSRNOG00000026657	10116.ENSRNOP00000050301	OL	289	1	2895329	0.9972	NOG45249	olfactory receptor Olr1428	-	-	-	-	51	17	3	0.40375	0.233105	0.766895	rattus
ENSRNOG00000032271	10116.ENSRNOP00000050734	OL	289	1	2895329	0.9972	NOG45249	olfactory receptor Olr1421	-	-	-	-	51	17	3	0.40375	0.233105	0.766895	rattus
ENSRNOG00000026657	10116.ENSRNOP00000050301	OL	289	1	2895329	0.9972	NOG45249	olfactory receptor Olr1428	-	-	-	-	51	17	3	0.40375	0.233105	0.766895	rattus
ENSRNOG00000016964	10116.ENSRNOP00000022759	OL	289	1	2895329	0.9972	NOG148345	olfactory receptor Olr143	-	-	-	-	23	19	1.21053	0.44551	0.40492	0.59508	rattus
ENSRNOG00000031194	10116.ENSRNOP00000039948	OL	0	0	0	0	NOG150849	olfactory receptor Olr1431	-	-	-	-	3	3	1	0.17044	0.17044	0.82956	rattus
ENSRNOG00000002858	10116.ENSRNOP00000055307	OL	0	0	0	0	NOG128310	olfactory receptor Olr1432	-	-	-	-	25	11	2.27273	0.2473	0.16404	0.83596	rattus
ENSRNOG00000038413	10116.ENSRNOP00000055299	OL	289	1	2895329	0.9972	NOG67819	olfactory receptor Olr1433	-	-	-	-	28	16	1.75	0.41319	0.312342	0.687658	rattus
ENSRNOG00000038411	10116.ENSRNOP00000055297	OL	0	0	0	0	NOG45573	olfactory receptor Olr1434	-	-	-	-	30	7	4.28571	0.22571	0.109028	0.890972	rattus
ENSRNOG00000029289	10116.ENSRNOP00000039895	OL	289	1	2895329	0.9972	NOG45573	olfactory receptor Olr1435	-	-	-	-	30	7	4.28571	0.22571	0.109028	0.890972	rattus
ENSRNOG00000031528	10116.ENSRNOP00000047976	OL	289	1	2895329	0.9972	NOG45573	olfactory receptor Olr1436	-	-	-	-	30	7	4.28571	0.22571	0.109028	0.890972	rattus
ENSRNOG00000030178	10116.ENSRNOP00000050506	OL	0	0	0	0	NOG45573	olfactory receptor Olr1437	-	-	-	-	30	7	4.28571	0.22571	0.109028	0.890972	rattus
ENSRNOG00000030488	10116.ENSRNOP00000043826	OL	0	0	0	0	NOG45573	olfactory receptor Olr1439	-	-	-	-	30	7	4.28571	0.22571	0.109028	0.890972	rattus
ENSRNOG00000016979	10116.ENSRNOP00000022773	OL	0	0	0	0	NOG46991	olfactory receptor Olr144	-	-	-	-	25	16	1.5625	0.40686	0.325488	0.674512	rattus
ENSRNOG00000030875	10116.ENSRNOP00000049731	OL	289	1	2895329	0.9972	NOG45573	olfactory receptor Olr1440	-	-	-	-	30	7	4.28571	0.22571	0.109028	0.890972	rattus
ENSRNOG00000031246	10116.ENSRNOP00000043505	OL	0	0	0	0	NOG45573	olfactory receptor Olr1442	-	-	-	-	30	7	4.28571	0.22571	0.109028	0.890972	rattus
ENSRNOG00000030041	10116.ENSRNOP00000044377	OL	0	0	0	0	NOG45573	olfactory receptor Olr1443	-	-	-	-	30	7	4.28571	0.22571	0.109028	0.890972	rattus
ENSRNOG00000031745	10116.ENSRNOP00000042706	OL	289	1	2895329	0.9972	NOG45573	olfactory receptor Olr1445	-	-	-	-	30	7	4.28571	0.22571	0.109028	0.890972	rattus
ENSRNOG00000030770	10116.ENSRNOP00000043553	OL	289	1	2895329	0.9972	NOG45573	olfactory receptor Olr1448	-	-	-	-	30	7	4.28571	0.22571	0.109028	0.890972	rattus
ENSRNOG00000031926	10116.ENSRNOP00000048031	OL	289	1	2895329	0.9972	NOG45249	olfactory receptor Olr1425	-	-	-	-	51	17	3	0.40375	0.233105	0.766895	rattus
ENSRNOG00000033659	10116.ENSRNOP00000043931	OL	289	1	2895329	0.9972	NOG45573	olfactory receptor Olr1450	-	-	-	-	30	7	4.28571	0.22571	0.109028	0.890972	rattus
ENSRNOG00000031114	10116.ENSRNOP00000045814	OL	0	0	0	0	NOG47682	olfactory receptor Olr1451	-	-	-	-	50	14	3.57143	0.35016	0.185287	0.814713	rattus
[truncated: 1,059 more rows]

## Sheet: Processed
StringName	StringID	tag	species	type	type2	k(i)	C(i)	<k(i)>v	<C(i)>v	Abundance	Diversity	Conservability	epi
OR10AC1P	9606.ENSP00000321222	OL	homo	OL	receptor	0	0	0	0	1	0.42013	0.42013	0.57987
OR51E2	9606.ENSP00000337929	OL	homo	OL	receptor	287	1	2879756	0.996	1	0.42013	0.42013	0.57987
OR4L1	9606.ENSP00000319217	OL	homo	OL	receptor	287	1	2879756	0.996	1.0625	0.4269	0.414154	0.585846
OR4M1	9606.ENSP00000319654	OL	homo	OL	receptor	287	1	2879756	0.996	1.0625	0.4269	0.414154	0.585846
OR4M2	9606.ENSP00000329467	OL	homo	OL	receptor	287	1	2879756	0.996	1.0625	0.4269	0.414154	0.585846
OR1Q1	9606.ENSP00000297913	OL	homo	OL	receptor	287	1	2879756	0.996	1	0.40943	0.40943	0.59057
OR51E1	9606.ENSP00000325744	OL	homo	OL	receptor	287	1	2879756	0.996	1	0.40943	0.40943	0.59057
OR13C8	9606.ENSP00000334068	OL	homo	OL	receptor	0	0	0	0	1.16667	0.43774	0.405268	0.594732
OR51I2	9606.ENSP00000341987	OL	homo	OL	receptor	287	1	2879756	0.996	1.21053	0.44551	0.40492	0.59508
OR9Q1	9606.ENSP00000334934	OL	homo	OL	receptor	0	0	0	0	1.06667	0.4167	0.403467	0.596533
OR5AP2	9606.ENSP00000303111	OL	homo	OL	receptor	287	1	2879756	0.996	1.17647	0.4325	0.398745	0.601255
OR10G6	9606.ENSP00000303817	OL	homo	OL	receptor	287	1	2879756	0.996	1	0.39793	0.39793	0.60207
OR10V1	9606.ENSP00000302199	OL	homo	OL	receptor	287	1	2879756	0.996	1	0.39793	0.39793	0.60207
OR51S1	9606.ENSP00000322754	OL	homo	OL	receptor	287	1	2879756	0.996	1	0.39793	0.39793	0.60207
OR52E5	9606.ENSP00000321398	OL	homo	OL	receptor	287	1	2879756	0.996	1.22222	0.43676	0.395065	0.604935
OR9Q2	9606.ENSP00000308714	OL	homo	OL	receptor	0	0	0	0	1.07143	0.40579	0.39203	0.60797
OR6N1	9606.ENSP00000335535	OL	homo	OL	receptor	287	1	2879756	0.996	1.31579	0.44776	0.390348	0.609652
OR6N2	9606.ENSP00000344101	OL	homo	OL	receptor	287	1	2879756	0.996	1.31579	0.44776	0.390348	0.609652
OR5AR1	9606.ENSP00000302639	OL	homo	OL	receptor	287	1	2879756	0.996	1.13333	0.41425	0.389121	0.610879
OR10Z1	9606.ENSP00000354707	OL	homo	OL	receptor	0	0	0	0	1	0.38551	0.38551	0.61449
OR1B1	9606.ENSP00000303151	OL	homo	OL	receptor	287	1	2879756	0.996	1	0.38551	0.38551	0.61449
OR51D1	9606.ENSP00000350222	OL	homo	OL	receptor	287	1	2879756	0.996	1	0.38551	0.38551	0.61449
OR52W1	9606.ENSP00000309673	OL	homo	OL	receptor	287	1	2879756	0.996	1	0.38551	0.38551	0.61449
OR6K6	9606.ENSP00000357126	OL	homo	OL	receptor	287	1	2879756	0.996	1	0.38551	0.38551	0.61449
OR6Y1	9606.ENSP00000304807	OL	homo	OL	receptor	287	1	2879756	0.996	1	0.38551	0.38551	0.61449
OR6S1	9606.ENSP00000313110	OL	homo	OL	receptor	287	1	2879756	0.996	1.13333	0.40947	0.384631	0.615369
OR2T6	9606.ENSP00000347965	OL	homo	OL	receptor	0	0	0	0	1.07692	0.39407	0.379736	0.620264
OR4D6	9606.ENSP00000300127	OL	homo	OL	receptor	287	1	2879756	0.996	1.07692	0.39407	0.379736	0.620264
OR4K5	9606.ENSP00000319511	OL	homo	OL	receptor	287	1	2879756	0.996	1.07692	0.39407	0.379736	0.620264
OR51L1	9606.ENSP00000322156	OL	homo	OL	receptor	287	1	2879756	0.996	1.07692	0.39407	0.379736	0.620264
OR8B4	9606.ENSP00000348449	OL	homo	OL	receptor	287	1	2879756	0.996	1.07692	0.39407	0.379736	0.620264
OR1M1	9606.ENSP00000303195	OL	homo	OL	receptor	287	1	2879756	0.996	1.14286	0.40326	0.377215	0.622785
OR51H1P	9606.ENSP00000322724	OL	homo	OL	receptor	287	1	2879756	0.996	1.14286	0.40326	0.377215	0.622785
OR51G2	9606.ENSP00000322593	OL	homo	OL	receptor	287	1	2879756	0.996	1.2	0.41257	0.376623	0.623377
OR5I1	9606.ENSP00000301532	OL	homo	OL	receptor	287	1	2879756	0.996	1.25	0.41769	0.373593	0.626407
OR4Q2	9606.ENSP00000372501	OL	homo	OL	receptor	0	0	0	0	1.2	0.40806	0.372506	0.627494
OR11H6	9606.ENSP00000319071	OL	homo	OL	receptor	0	0	0	0	1	0.37201	0.37201	0.62799
OR51M1	9606.ENSP00000333196	OL	homo	OL	receptor	287	1	2879756	0.996	1	0.37201	0.37201	0.62799
OR52D1	9606.ENSP00000326232	OL	homo	OL	receptor	287	1	2879756	0.996	1.35294	0.42681	0.36694	0.63306
OR4K2	9606.ENSP00000298642	OL	homo	OL	receptor	287	1	2879756	0.996	1.08333	0.38139	0.366428	0.633572
OR51G1	9606.ENSP00000322546	OL	homo	OL	receptor	287	1	2879756	0.996	1.08333	0.38139	0.366428	0.633572
OR2Z1	9606.ENSP00000316284	OL	homo	OL	receptor	287	1	2879756	0.996	1.42105	0.43662	0.366268	0.633732
OR2V2	9606.ENSP00000332185	OL	homo	OL	receptor	287	1	2879756	0.996	1.26667	0.41153	0.365654	0.634346
OR4K1	9606.ENSP00000285600	OL	homo	OL	receptor	287	1	2879756	0.996	1.26667	0.41153	0.365654	0.634346
OR10W1	9606.ENSP00000311220	OL	homo	OL	receptor	287	1	2879756	0.996	1.21429	0.4016	0.364445	0.635555
OR51T1	9606.ENSP00000369738	OL	homo	OL	receptor	287	1	2879756	0.996	1.21429	0.4016	0.364445	0.635555
OR2T11	9606.ENSP00000328934	OL	homo	OL	receptor	287	1	2879756	0.996	1.15385	0.39146	0.364429	0.635571
OR52N1	9606.ENSP00000322823	OL	homo	OL	receptor	287	1	2879756	0.996	1.15385	0.39146	0.364429	0.635571
OR13F1	9606.ENSP00000334452	OL	homo	OL	receptor	0	0	0	0	1.3125	0.41726	0.364214	0.635786
OR52E4	9606.ENSP00000321426	OL	homo	OL	receptor	287	1	2879756	0.996	1.41176	0.43032	0.362169	0.637831
OR1N2	9606.ENSP00000362792	OL	homo	OL	receptor	287	1	2879756	0.996	1	0.35723	0.35723	0.64277
OR2K2	9606.ENSP00000363550	OL	homo	OL	receptor	287	1	2879756	0.996	1	0.35723	0.35723	0.64277
OR4D5	9606.ENSP00000305970	OL	homo	OL	receptor	287	1	2879756	0.996	1	0.35723	0.35723	0.64277
OR4F6	9606.ENSP00000327525	OL	homo	OL	receptor	287	1	2879756	0.996	1	0.35723	0.35723	0.64277
OR5C1	9606.ENSP00000362784	OL	homo	OL	receptor	287	1	2879756	0.996	1	0.35723	0.35723	0.64277
OR10K1	9606.ENSP00000289451	OL	homo	OL	receptor	287	1	2879756	0.996	1.5	0.43662	0.356499	0.643501
OR10K2	9606.ENSP00000324251	OL	homo	OL	receptor	287	1	2879756	0.996	1.5	0.43662	0.356499	0.643501
OR10X1	9606.ENSP00000357132	OL	homo	OL	receptor	0	0	0	0	1.33333	0.411	0.355937	0.644063
OR4C3	9606.ENSP00000321419	OL	homo	OL	receptor	287	1	2879756	0.996	1.33333	0.411	0.355937	0.644063
OR52M1	9606.ENSP00000353343	OL	homo	OL	receptor	287	1	2879756	0.996	1.375	0.4172	0.355789	0.644211
OR13J1	9606.ENSP00000306150	OL	homo	OL	receptor	0	0	0	0	1.3125	0.40702	0.355276	0.644724
OR10D3P	9606.ENSP00000323895	OL	homo	OL	receptor	0	0	0	0	1.09091	0.36759	0.35194	0.64806
OR52L1	9606.ENSP00000330338	OL	homo	OL	receptor	287	1	2879756	0.996	1.23077	0.38982	0.351379	0.648621
OR52L2P	9606.ENSP00000321219	OL	homo	OL	receptor	0	0	0	0	1.23077	0.38982	0.351379	0.648621
OR5D14	9606.ENSP00000334456	OL	homo	OL	receptor	287	1	2879756	0.996	1.23077	0.38982	0.351379	0.648621
OR8K1	9606.ENSP00000279783	OL	homo	OL	receptor	0	0	0	0	1.16667	0.3787	0.350608	0.649392
OR2T2	9606.ENSP00000343062	OL	homo	OL	receptor	287	1	2879756	0.996	1.28571	0.39611	0.349337	0.650663
OR2T35	9606.ENSP00000324369	OL	homo	OL	receptor	287	1	2879756	0.996	1.28571	0.39611	0.349337	0.650663
OR52N2	9606.ENSP00000322801	OL	homo	OL	receptor	287	1	2879756	0.996	1.57895	0.43623	0.347161	0.652839
OR2G6	9606.ENSP00000341291	OL	homo	OL	receptor	287	1	2879756	0.996	1.23077	0.38474	0.3468	0.6532
OR10A7	9606.ENSP00000326718	OL	homo	OL	receptor	287	1	2879756	0.996	1.16667	0.3729	0.345238	0.654762
OR4F15	9606.ENSP00000333184	OL	homo	OL	receptor	287	1	2879756	0.996	1.52941	0.42477	0.343472	0.656528
OR11H4	9606.ENSP00000318997	OL	homo	OL	receptor	0	0	0	0	1.28571	0.38867	0.342775	0.657225
OR52K1	9606.ENSP00000302422	OL	homo	OL	receptor	287	1	2879756	0.996	1.55556	0.42629	0.341792	0.658208
OR10S1	9606.ENSP00000353947	OL	homo	OL	receptor	287	1	2879756	0.996	1	0.34088	0.34088	0.65912
OR10T2	9606.ENSP00000334115	OL	homo	OL	receptor	287	1	2879756	0.996	1	0.34088	0.34088	0.65912
OR5B21	9606.ENSP00000353537	OL	homo	OL	receptor	0	0	0	0	1	0.34088	0.34088	0.65912
OR6Q1	9606.ENSP00000307734	OL	homo	OL	receptor	287	1	2879756	0.996	1	0.34088	0.34088	0.65912
OR7D2	9606.ENSP00000345563	OL	homo	OL	receptor	0	0	0	0	1	0.34088	0.34088	0.65912
OR51A7	9606.ENSP00000352305	OL	homo	OL	receptor	287	1	2879756	0.996	1.35714	0.39593	0.339865	0.660135
OR10G3	9606.ENSP00000302437	OL	homo	OL	receptor	287	1	2879756	0.996	1.25	0.37712	0.337306	0.662694
OR1K1	9606.ENSP00000277309	OL	homo	OL	receptor	287	1	2879756	0.996	1.1	0.35246	0.336057	0.663943
OR2T1	9606.ENSP00000355430	OL	homo	OL	receptor	287	1	2879756	0.996	1.1	0.35246	0.336057	0.663943
OR3A4	9606.ENSP00000313764	OL	homo	OL	receptor	287	1	2879756	0.996	1.1	0.35246	0.336057	0.663943
OR6K2	9606.ENSP00000352626	OL	homo	OL	receptor	287	1	2879756	0.996	1.1	0.35246	0.336057	0.663943
OR8D2	9606.ENSP00000350022	OL	homo	OL	receptor	287	1	2879756	0.996	1.25	0.37171	0.332468	0.667532
OR10J1	9606.ENSP00000302656	OL	homo	OL	receptor	287	1	2879756	0.996	1.5625	0.41546	0.332368	0.667632
OR10J6P	9606.ENSP00000289731	OL	homo	OL	receptor	0	0	0	0	1.5625	0.41546	0.332368	0.667632
OR6F1	9606.ENSP00000305640	OL	homo	OL	receptor	287	1	2879756	0.996	1.42857	0.39618	0.331468	0.668532
OR5M3	9606.ENSP00000312208	OL	homo	OL	receptor	287	1	2879756	0.996	1.53333	0.40811	0.329579	0.670421
OR9G4	9606.ENSP00000307515	OL	homo	OL	receptor	0	0	0	0	1.53333	0.40458	0.326728	0.673272
OR51I1	9606.ENSP00000369559	OL	homo	OL	receptor	287	1	2879756	0.996	1.5625	0.40686	0.325488	0.674512
OR6K3	9606.ENSP00000357128	OL	homo	OL	receptor	287	1	2879756	0.996	1.5	0.39678	0.32397	0.67603
OR4X1	9606.ENSP00000321506	OL	homo	OL	receptor	287	1	2879756	0.996	1	0.32261	0.32261	0.67739
OR52B6	9606.ENSP00000341581	OL	homo	OL	receptor	287	1	2879756	0.996	1	0.32261	0.32261	0.67739
OR5AU1	9606.ENSP00000302057	OL	homo	OL	receptor	287	1	2879756	0.996	1	0.32261	0.32261	0.67739
OR6P1	9606.ENSP00000334721	OL	homo	OL	receptor	287	1	2879756	0.996	1.27273	0.36334	0.322066	0.677934
OR6C74	9606.ENSP00000342836	OL	homo	OL	receptor	0	0	0	0	1.33333	0.3713	0.321556	0.678444
OR10J3	9606.ENSP00000331789	OL	homo	OL	receptor	287	1	2879756	0.996	1.2	0.34967	0.319204	0.680796
OR4K13	9606.ENSP00000319322	OL	homo	OL	receptor	287	1	2879756	0.996	1.2	0.34967	0.319204	0.680796
OR8I2	9606.ENSP00000303864	OL	homo	OL	receptor	0	0	0	0	1.2	0.34967	0.319204	0.680796
OR4K14	9606.ENSP00000305011	OL	homo	OL	receptor	287	1	2879756	0.996	1.11111	0.33572	0.318492	0.681508
OR51F2	9606.ENSP00000323952	OL	homo	OL	receptor	287	1	2879756	0.996	1.11111	0.33572	0.318492	0.681508
OR51F1	9606.ENSP00000369744	OL	homo	OL	receptor	0	0	0	0	1.57143	0.39765	0.317215	0.682785
OR2T27	9606.ENSP00000342008	OL	homo	OL	receptor	287	1	2879756	0.996	1.27273	0.35754	0.316925	0.683075
OR2T27	9606.ENSP00000342008	OL	homo	OL	receptor	287	1	2879756	0.996	1.27273	0.35754	0.316925	0.683075
OR10A2	9606.ENSP00000303862	OL	homo	OL	receptor	287	1	2879756	0.996	1.76471	0.42013	0.316262	0.683738
OR10A5	9606.ENSP00000369159	OL	homo	OL	receptor	287	1	2879756	0.996	1.76471	0.42013	0.316262	0.683738
OR51Q1	9606.ENSP00000300778	OL	homo	OL	receptor	287	1	2879756	0.996	1.66667	0.40686	0.315152	0.684848
OR8U1	9606.ENSP00000304188	OL	homo	OL	receptor	0	0	0	0	1.83333	0.42395	0.313108	0.686892
OR8U1	9606.ENSP00000304188	OL	homo	OL	receptor	0	0	0	0	1.83333	0.42395	0.313108	0.686892
OR4N2	9606.ENSP00000319601	OL	homo	OL	receptor	287	1	2879756	0.996	1.88235	0.42672	0.311023	0.688977
OR4N5	9606.ENSP00000332110	OL	homo	OL	receptor	287	1	2879756	0.996	1.88235	0.42672	0.311023	0.688977
OR5J2	9606.ENSP00000310788	OL	homo	OL	receptor	287	1	2879756	0.996	1.82353	0.41787	0.309446	0.690554
OR2D2	9606.ENSP00000299459	OL	homo	OL	receptor	287	1	2879756	0.996	1.53846	0.38137	0.30747	0.69253
OR10A4	9606.ENSP00000369157	OL	homo	OL	receptor	287	1	2879756	0.996	1.5	0.37655	0.307452	0.692548
OR6C1	9606.ENSP00000368990	OL	homo	OL	receptor	287	1	2879756	0.996	1.88235	0.42	0.306125	0.693875
OR2AJ1	9606.ENSP00000325078	OL	homo	OL	receptor	287	1	2879756	0.996	1.36364	0.35737	0.306033	0.693967
OR10AD1	9606.ENSP00000308689	OL	homo	OL	receptor	287	1	2879756	0.996	1.64286	0.3917	0.3056	0.6944
OR10G2	9606.ENSP00000308821	OL	homo	OL	receptor	287	1	2879756	0.996	1.3	0.3483	0.305479	0.694521
OR8D4	9606.ENSP00000325381	OL	homo	OL	receptor	287	1	2879756	0.996	1.53333	0.37788	0.305166	0.694834
OR5T1	9606.ENSP00000323612	OL	homo	OL	receptor	287	1	2879756	0.996	1.82353	0.41093	0.304307	0.695693
OR5T3	9606.ENSP00000305403	OL	homo	OL	receptor	287	1	2879756	0.996	1.82353	0.41093	0.304307	0.695693
OR5M9	9606.ENSP00000279791	OL	homo	OL	receptor	287	1	2879756	0.996	1.53333	0.37586	0.303535	0.696465
OR4F3	9606.ENSP00000329982	OL	homo	OL	receptor	287	1	2879756	0.996	1.53846	0.37468	0.302077	0.697923
ENSG00000176269	9606.ENSP00000318878	OL	homo	OL	receptor	0	0	0	0	1.53846	0.37468	0.302077	0.697923
OR2C1	9606.ENSP00000307726	OL	homo	OL	receptor	287	1	2879756	0.996	1.36364	0.35196	0.3014	0.6986
OR9K2	9606.ENSP00000307598	OL	homo	OL	receptor	0	0	0	0	2.2	0.44684	0.301259	0.698741
OR6C70	9606.ENSP00000329153	OL	homo	OL	receptor	0	0	0	0	1.61538	0.38267	0.301084	0.698916
OR5L1	9606.ENSP00000335529	OL	homo	OL	receptor	287	1	2879756	0.996	2.05556	0.43155	0.301	0.699
OR5L2	9606.ENSP00000367650	OL	homo	OL	receptor	287	1	2879756	0.996	2.05556	0.43155	0.301	0.699
OR5A1	9606.ENSP00000303096	OL	homo	OL	receptor	287	1	2879756	0.996	1.64706	0.38435	0.299483	0.700517
OR8J1	9606.ENSP00000304060	OL	homo	OL	receptor	0	0	0	0	2.15	0.43903	0.299416	0.700584
OR8J3	9606.ENSP00000301529	OL	homo	OL	receptor	0	0	0	0	2.15	0.43903	0.299416	0.700584
OR2W6P	9606.ENSP00000303839	OL	homo	OL	receptor	0	0	0	0	1.75	0.39556	0.299015	0.700985
OR10J5	9606.ENSP00000334441	OL	homo	OL	receptor	287	1	2879756	0.996	1.125	0.31698	0.298852	0.701148
OR4Q3	9606.ENSP00000330049	OL	homo	OL	receptor	287	1	2879756	0.996	1.125	0.31698	0.298852	0.701148
OR6C65	9606.ENSP00000368986	OL	homo	OL	receptor	0	0	0	0	1.125	0.31698	0.298852	0.701148
OR4X2	9606.ENSP00000307751	OL	homo	OL	receptor	287	1	2879756	0.996	1.8	0.39875	0.297211	0.702789
OR13C2	9606.ENSP00000317447	OL	homo	OL	receptor	0	0	0	0	1.8	0.39835	0.296913	0.703087
OR13C5	9606.ENSP00000363911	OL	homo	OL	receptor	0	0	0	0	1.8	0.39835	0.296913	0.703087
OR13C9	9606.ENSP00000259362	OL	homo	OL	receptor	0	0	0	0	1.8	0.39835	0.296913	0.703087
OR6C76	9606.ENSP00000328402	OL	homo	OL	receptor	0	0	0	0	1.45455	0.35786	0.296721	0.703279
OR2A4	9606.ENSP00000319546	OL	homo	OL	receptor	287	1	2879756	0.996	1.4	0.34798	0.294097	0.705903
OR8A1	9606.ENSP00000284287	OL	homo	OL	receptor	287	1	2879756	0.996	1.64286	0.37653	0.293764	0.706236
OR13C3	9606.ENSP00000363913	OL	homo	OL	receptor	0	0	0	0	1.8	0.39339	0.293216	0.706784
OR13C4	9606.ENSP00000277216	OL	homo	OL	receptor	0	0	0	0	1.8	0.39339	0.293216	0.706784
OR10P1	9606.ENSP00000308082	OL	homo	OL	receptor	287	1	2879756	0.996	1.61538	0.37243	0.293027	0.706973
OR8H1	9606.ENSP00000323595	OL	homo	OL	receptor	0	0	0	0	1.875	0.39768	0.290424	0.709576
OR6A2	9606.ENSP00000330384	OL	homo	OL	receptor	287	1	2879756	0.996	2.38095	0.44725	0.289851	0.710149
OR56A1	9606.ENSP00000321246	OL	homo	OL	receptor	287	1	2879756	0.996	2.35	0.44314	0.289073	0.710927
OR56A4	9606.ENSP00000328215	OL	homo	OL	receptor	287	1	2879756	0.996	2.35	0.44314	0.289073	0.710927
OR9I1	9606.ENSP00000302606	OL	homo	OL	receptor	0	0	0	0	1.9375	0.40137	0.288353	0.711647
OR52N4	9606.ENSP00000323224	OL	homo	OL	receptor	287	1	2879756	0.996	2.3	0.43469	0.286626	0.713374
OR9G1	9606.ENSP00000309012	OL	homo	OL	receptor	0	0	0	0	2	0.40425	0.285848	0.714152
OR9G1	9606.ENSP00000309012	OL	homo	OL	receptor	0	0	0	0	2	0.40425	0.285848	0.714152
OR56A3	9606.ENSP00000331572	OL	homo	OL	receptor	0	0	0	0	2.31579	0.43497	0.285831	0.714169
OR6C75	9606.ENSP00000368987	OL	homo	OL	receptor	0	0	0	0	1.93333	0.3968	0.285377	0.714623
OR52R1	9606.ENSP00000369742	OL	homo	OL	receptor	287	1	2879756	0.996	1.76923	0.37882	0.284801	0.715199
ENSG00000206522	9606.ENSP00000373147	OL	homo	OL	receptor	0	0	0	0	1.8	0.37941	0.282796	0.717204
OR4K15	9606.ENSP00000304077	OL	homo	OL	receptor	287	1	2879756	0.996	1.93333	0.39218	0.282054	0.717946
OR4K17	9606.ENSP00000319197	OL	homo	OL	receptor	287	1	2879756	0.996	1.93333	0.39218	0.282054	0.717946
OR1I1	9606.ENSP00000209540	OL	homo	OL	receptor	287	1	2879756	0.996	1.25	0.31421	0.281038	0.718962
OR52H1	9606.ENSP00000326259	OL	homo	OL	receptor	287	1	2879756	0.996	2.4	0.43527	0.280966	0.719034
OR13G1	9606.ENSP00000352717	OL	homo	OL	receptor	0	0	0	0	1.76923	0.373	0.280425	0.719575
OR2S2	9606.ENSP00000344040	OL	homo	OL	receptor	287	1	2879756	0.996	2.36842	0.43125	0.28022	0.71978
OR5F1	9606.ENSP00000278409	OL	homo	OL	receptor	287	1	2879756	0.996	1.5	0.34303	0.280083	0.719917
OR52J3	9606.ENSP00000369728	OL	homo	OL	receptor	0	0	0	0	1.85714	0.37988	0.278756	0.721244
OR2C3	9606.ENSP00000326567	OL	homo	OL	receptor	287	1	2879756	0.996	1	0.27798	0.27798	0.72202
OR52E6	9606.ENSP00000369279	OL	homo	OL	receptor	287	1	2879756	0.996	1.92308	0.3843	0.277122	0.722878
OR52E8	9606.ENSP00000328878	OL	homo	OL	receptor	287	1	2879756	0.996	1.92308	0.3843	0.277122	0.722878
ENSG00000206525	9606.ENSP00000373150	OL	homo	OL	receptor	0	0	0	0	2	0.39121	0.276627	0.723373
OR2AP1	9606.ENSP00000323423	OL	homo	OL	receptor	287	1	2879756	0.996	2.44444	0.43217	0.276417	0.723583
OR6C4	9606.ENSP00000323499	OL	homo	OL	receptor	287	1	2879756	0.996	2.44444	0.43217	0.276417	0.723583
OR13D1	9606.ENSP00000317357	OL	homo	OL	receptor	0	0	0	0	1.5	0.33762	0.275666	0.724334
OR8B12	9606.ENSP00000307159	OL	homo	OL	receptor	287	1	2879756	0.996	2.29412	0.41746	0.275618	0.724382
OR8B8	9606.ENSP00000330280	OL	homo	OL	receptor	287	1	2879756	0.996	2.29412	0.41746	0.275618	0.724382
OR4F17	9606.ENSP00000315047	OL	homo	OL	receptor	287	1	2879756	0.996	1.63636	0.35125	0.274585	0.725415
OR4F4	9606.ENSP00000334393	OL	homo	OL	receptor	287	1	2879756	0.996	1.63636	0.35125	0.274585	0.725415
OR4F5	9606.ENSP00000317482	OL	homo	OL	receptor	287	1	2879756	0.996	1.63636	0.35125	0.274585	0.725415
OR51V1	9606.ENSP00000321729	OL	homo	OL	receptor	287	1	2879756	0.996	2.61905	0.44423	0.274496	0.725504
OR11H1	9606.ENSP00000252835	OL	homo	OL	receptor	0	0	0	0	1.25	0.30609	0.273775	0.726225
OR11H12	9606.ENSP00000352724	OL	homo	OL	receptor	0	0	0	0	1.25	0.30609	0.273775	0.726225
OR11H2	9606.ENSP00000334711	OL	homo	OL	receptor	0	0	0	0	1.25	0.30609	0.273775	0.726225
OR3A1	9606.ENSP00000313803	OL	homo	OL	receptor	287	1	2879756	0.996	2.8	0.45783	0.273606	0.726394
OR3A3	9606.ENSP00000291231	OL	homo	OL	receptor	287	1	2879756	0.996	2.8	0.45783	0.273606	0.726394
OR1D2	9606.ENSP00000327585	OL	homo	OL	receptor	287	1	2879756	0.996	1.6	0.34442	0.272288	0.727712
OR1D4	9606.ENSP00000327564	OL	homo	OL	receptor	0	0	0	0	1.6	0.34442	0.272288	0.727712
OR1D4	9606.ENSP00000327564	OL	homo	OL	receptor	0	0	0	0	1.6	0.34442	0.272288	0.727712
OR2D3	9606.ENSP00000320560	OL	homo	OL	receptor	287	1	2879756	0.996	2.17647	0.4003	0.271337	0.728663
OR1L3	9606.ENSP00000302863	OL	homo	OL	receptor	287	1	2879756	0.996	2.6	0.43643	0.270662	0.729338
OR1L4	9606.ENSP00000259466	OL	homo	OL	receptor	287	1	2879756	0.996	2.6	0.43643	0.270662	0.729338
OR1L6	9606.ENSP00000362788	OL	homo	OL	receptor	287	1	2879756	0.996	2.6	0.43643	0.270662	0.729338
OR1L8	9606.ENSP00000306607	OL	homo	OL	receptor	287	1	2879756	0.996	2.6	0.43643	0.270662	0.729338
OR5D13	9606.ENSP00000354800	OL	homo	OL	receptor	287	1	2879756	0.996	2	0.38029	0.268906	0.731094
OR5M8	9606.ENSP00000323354	OL	homo	OL	receptor	287	1	2879756	0.996	1.76923	0.35716	0.268516	0.731484
ENSG00000206516	9606.ENSP00000373140	OL	homo	OL	receptor	0	0	0	0	2.7	0.4376	0.266315	0.733685
OR4B1	9606.ENSP00000311605	OL	homo	OL	receptor	287	1	2879756	0.996	3.04167	0.46316	0.265568	0.734432
OR4S1	9606.ENSP00000321447	OL	homo	OL	receptor	287	1	2879756	0.996	3.04167	0.46316	0.265568	0.734432
OR4S2	9606.ENSP00000310337	OL	homo	OL	receptor	287	1	2879756	0.996	3.04167	0.46316	0.265568	0.734432
ENSG00000141194	9606.ENSP00000365451	OL	homo	OL	receptor	0	0	0	0	2.7	0.43423	0.264264	0.735736
OR4D2	9606.ENSP00000284081	OL	homo	OL	receptor	287	1	2879756	0.996	2.7	0.43423	0.264264	0.735736
OR10A3	9606.ENSP00000353988	OL	homo	OL	receptor	287	1	2879756	0.996	2.47368	0.41471	0.263677	0.736323
OR10A6	9606.ENSP00000312470	OL	homo	OL	receptor	287	1	2879756	0.996	2.47368	0.41471	0.263677	0.736323
OR1S1	9606.ENSP00000311688	OL	homo	OL	receptor	287	1	2879756	0.996	1.92308	0.36323	0.261929	0.738071
OR1S2	9606.ENSP00000305469	OL	homo	OL	receptor	287	1	2879756	0.996	1.92308	0.36323	0.261929	0.738071
OR51B2	9606.ENSP00000327540	OL	homo	OL	receptor	287	1	2879756	0.996	2.73684	0.43289	0.261669	0.738331
OR51B4	9606.ENSP00000333305	OL	homo	OL	receptor	287	1	2879756	0.996	2.73684	0.43289	0.261669	0.738331
OR51B6	9606.ENSP00000369568	OL	homo	OL	receptor	287	1	2879756	0.996	2.73684	0.43289	0.261669	0.738331
OR6C68	9606.ENSP00000368983	OL	homo	OL	receptor	0	0	0	0	2.07692	0.37445	0.259827	0.740173
OR56B1	9606.ENSP00000322939	OL	homo	OL	receptor	287	1	2879756	0.996	1.83333	0.35117	0.259356	0.740644
OR6B2	9606.ENSP00000328013	OL	homo	OL	receptor	287	1	2879756	0.996	1.81818	0.34911	0.258907	0.741093
OR6B3	9606.ENSP00000322435	OL	homo	OL	receptor	287	1	2879756	0.996	1.81818	0.34911	0.258907	0.741093
OR9A2	9606.ENSP00000316518	OL	homo	OL	receptor	0	0	0	0	2.07692	0.36804	0.255379	0.744621
OR4P4	9606.ENSP00000324831	OL	homo	OL	receptor	287	1	2879756	0.996	2.68421	0.41627	0.254078	0.745922
OR6X1	9606.ENSP00000333724	OL	homo	OL	receptor	287	1	2879756	0.996	1.78571	0.33929	0.253902	0.746098
OR4A15	9606.ENSP00000325065	OL	homo	OL	receptor	287	1	2879756	0.996	2.85	0.42719	0.253046	0.746954
OR4A16	9606.ENSP00000325128	OL	homo	OL	receptor	287	1	2879756	0.996	2.85	0.42719	0.253046	0.746954
OR10H1	9606.ENSP00000335596	OL	homo	OL	receptor	287	1	2879756	0.996	2.46667	0.39704	0.252801	0.747199
OR10H2	9606.ENSP00000306095	OL	homo	OL	receptor	287	1	2879756	0.996	2.46667	0.39704	0.252801	0.747199
OR10H5	9606.ENSP00000310704	OL	homo	OL	receptor	287	1	2879756	0.996	2.46667	0.39704	0.252801	0.747199
OR4C45	9606.ENSP00000367701	OL	homo	OL	receptor	0	0	0	0	2.14286	0.369	0.252075	0.747925
OR5AK2	9606.ENSP00000322784	OL	homo	OL	receptor	287	1	2879756	0.996	2.4	0.39022	0.251886	0.748114
OR5AK3P	9606.ENSP00000322824	OL	homo	OL	receptor	0	0	0	0	2.4	0.39022	0.251886	0.748114
OR10Q1	9606.ENSP00000314324	OL	homo	OL	receptor	287	1	2879756	0.996	1.83333	0.3407	0.251624	0.748376
OR1G1	9606.ENSP00000371379	OL	homo	OL	receptor	287	1	2879756	0.996	1.16667	0.27117	0.251054	0.748946
OR5A2	9606.ENSP00000303834	OL	homo	OL	receptor	287	1	2879756	0.996	1.16667	0.27117	0.251054	0.748946
OR51J1	9606.ENSP00000332473	OL	homo	OL	receptor	287	1	2879756	0.996	1	0.24969	0.24969	0.75031
OR2B11	9606.ENSP00000325682	OL	homo	OL	receptor	287	1	2879756	0.996	2.88889	0.42061	0.247465	0.752535
OR2B2	9606.ENSP00000304419	OL	homo	OL	receptor	287	1	2879756	0.996	2.88889	0.42061	0.247465	0.752535
OR2B3	9606.ENSP00000366378	OL	homo	OL	receptor	0	0	0	0	2.88889	0.42061	0.247465	0.752535
OR2G2	9606.ENSP00000326349	OL	homo	OL	receptor	287	1	2879756	0.996	2.88889	0.42061	0.247465	0.752535
OR2G3	9606.ENSP00000326301	OL	homo	OL	receptor	287	1	2879756	0.996	2.88889	0.42061	0.247465	0.752535
OR1A1	9606.ENSP00000305207	OL	homo	OL	receptor	287	1	2879756	0.996	2.52941	0.39286	0.247018	0.752982
OR1A2	9606.ENSP00000371377	OL	homo	OL	receptor	287	1	2879756	0.996	2.52941	0.39286	0.247018	0.752982
OR2AT4	9606.ENSP00000304846	OL	homo	OL	receptor	0	0	0	0	2	0.34699	0.245359	0.754641
OR1E1	9606.ENSP00000313384	OL	homo	OL	receptor	0	0	0	0	3.09524	0.42959	0.244178	0.755822
OR1E2	9606.ENSP00000248384	OL	homo	OL	receptor	0	0	0	0	3.09524	0.42959	0.244178	0.755822
OR11G2	9606.ENSP00000349930	OL	homo	OL	receptor	0	0	0	0	2.76471	0.40071	0.240994	0.759006
OR4C6	9606.ENSP00000324769	OL	homo	OL	receptor	287	1	2879756	0.996	2.09091	0.34847	0.240989	0.759011
OR2AG1	9606.ENSP00000307447	OL	homo	OL	receptor	287	1	2879756	0.996	2.84211	0.40521	0.240359	0.759641
OR2AG2	9606.ENSP00000342697	OL	homo	OL	receptor	0	0	0	0	2.84211	0.40521	0.240359	0.759641
OR10D4P	9606.ENSP00000333960	OL	homo	OL	receptor	0	0	0	0	2.07692	0.34389	0.238622	0.761378
OR52E2	9606.ENSP00000322088	OL	homo	OL	receptor	287	1	2879756	0.996	2.09091	0.34448	0.23823	0.76177
OR10R2	9606.ENSP00000357134	OL	homo	OL	receptor	287	1	2879756	0.996	2.35714	0.36411	0.237159	0.762841
OR7C1	9606.ENSP00000248073	OL	homo	OL	receptor	287	1	2879756	0.996	2.70588	0.38843	0.236134	0.763866
OR7C2	9606.ENSP00000369336	OL	homo	OL	receptor	287	1	2879756	0.996	2.70588	0.38843	0.236134	0.763866
OR4D10	9606.ENSP00000320124	OL	homo	OL	receptor	0	0	0	0	3.52632	0.44326	0.236047	0.763953
OR4D11	9606.ENSP00000320077	OL	homo	OL	receptor	287	1	2879756	0.996	3.52632	0.44326	0.236047	0.763953
OR4D9	9606.ENSP00000328563	OL	homo	OL	receptor	287	1	2879756	0.996	3.52632	0.44326	0.236047	0.763953
OR5AN1	9606.ENSP00000320302	OL	homo	OL	receptor	287	1	2879756	0.996	3.11111	0.41493	0.235243	0.764757
OR5V1	9606.ENSP00000366356	OL	homo	OL	receptor	0	0	0	0	2.94118	0.40283	0.234888	0.765112
OR2T29	9606.ENSP00000331774	OL	homo	OL	receptor	287	1	2879756	0.996	3	0.40375	0.233105	0.766895
OR2T4	9606.ENSP00000355431	OL	homo	OL	receptor	287	1	2879756	0.996	3	0.40375	0.233105	0.766895
OR2T5	9606.ENSP00000355429	OL	homo	OL	receptor	287	1	2879756	0.996	3	0.40375	0.233105	0.766895
OR5R1	9606.ENSP00000308595	OL	homo	OL	receptor	287	1	2879756	0.996	1.55556	0.2903	0.232757	0.767243
OR5AS1	9606.ENSP00000324111	OL	homo	OL	receptor	287	1	2879756	0.996	1.5	0.28147	0.229819	0.770181
OR6C6	9606.ENSP00000351211	OL	homo	OL	receptor	0	0	0	0	3.16667	0.40434	0.227219	0.772781
OR56B4	9606.ENSP00000321196	OL	homo	OL	receptor	287	1	2879756	0.996	2.46154	0.35608	0.226957	0.773043
OR5P3	9606.ENSP00000332068	OL	homo	OL	receptor	287	1	2879756	0.996	3.10526	0.39891	0.226374	0.773626
OR2M2	9606.ENSP00000352710	OL	homo	OL	receptor	287	1	2879756	0.996	3.13333	0.39917	0.225504	0.774496
OR2M4	9606.ENSP00000306688	OL	homo	OL	receptor	287	1	2879756	0.996	3.13333	0.39917	0.225504	0.774496
OR2M5	9606.ENSP00000355432	OL	homo	OL	receptor	287	1	2879756	0.996	3.13333	0.39917	0.225504	0.774496
OR2M7	9606.ENSP00000324557	OL	homo	OL	receptor	287	1	2879756	0.996	3.13333	0.39917	0.225504	0.774496
OR5K3	9606.ENSP00000373194	OL	homo	OL	receptor	0	0	0	0	3.29412	0.40478	0.223023	0.776977
OR10G7	9606.ENSP00000329689	OL	homo	OL	receptor	287	1	2879756	0.996	2.84615	0.37586	0.222791	0.777209
OR4C13	9606.ENSP00000314947	OL	homo	OL	receptor	287	1	2879756	0.996	3	0.3856	0.222626	0.777374
OR4C46	9606.ENSP00000329056	OL	homo	OL	receptor	0	0	0	0	3	0.3856	0.222626	0.777374
OR8S1	9606.ENSP00000310632	OL	homo	OL	receptor	0	0	0	0	3	0.38451	0.221997	0.778003
OR1N1	9606.ENSP00000352412	OL	homo	OL	receptor	287	1	2879756	0.996	1.5	0.26919	0.219793	0.780207
OR13H1	9606.ENSP00000340748	OL	homo	OL	receptor	0	0	0	0	1.91667	0.29918	0.216102	0.783898
OR12D2	9606.ENSP00000306854	OL	homo	OL	receptor	0	0	0	0	3.58824	0.40807	0.215424	0.784576
OR12D3	9606.ENSP00000366348	OL	homo	OL	receptor	0	0	0	0	3.58824	0.40807	0.215424	0.784576
OR2B6	9606.ENSP00000244623	OL	homo	OL	receptor	287	1	2879756	0.996	1	0.21507	0.21507	0.78493
OR52N5	9606.ENSP00000322866	OL	homo	OL	receptor	287	1	2879756	0.996	1	0.21507	0.21507	0.78493
OR1J1	9606.ENSP00000259357	OL	homo	OL	receptor	287	1	2879756	0.996	3.38889	0.39436	0.214222	0.785778
OR1J2	9606.ENSP00000343521	OL	homo	OL	receptor	287	1	2879756	0.996	3.38889	0.39436	0.214222	0.785778
OR6C3	9606.ENSP00000368989	OL	homo	OL	receptor	287	1	2879756	0.996	2.58333	0.34311	0.213473	0.786527
OR8K5	9606.ENSP00000323853	OL	homo	OL	receptor	0	0	0	0	2.66667	0.34534	0.211477	0.788523
OR5T2	9606.ENSP00000323688	OL	homo	OL	receptor	287	1	2879756	0.996	2	0.29517	0.208717	0.791283
OR5H2	9606.ENSP00000347418	OL	homo	OL	receptor	287	1	2879756	0.996	3.2	0.36644	0.204846	0.795154
OR4C15	9606.ENSP00000324958	OL	homo	OL	receptor	287	1	2879756	0.996	2.45455	0.31909	0.20367	0.79633
OR52A1	9606.ENSP00000369725	OL	homo	OL	receptor	287	1	2879756	0.996	4.52381	0.43317	0.20366	0.79634
OR52A5	9606.ENSP00000303469	OL	homo	OL	receptor	287	1	2879756	0.996	4.52381	0.43317	0.20366	0.79634
OR7A10	9606.ENSP00000248058	OL	homo	OL	receptor	287	1	2879756	0.996	3.15385	0.36135	0.203473	0.796527
OR7A17	9606.ENSP00000328144	OL	homo	OL	receptor	287	1	2879756	0.996	3.15385	0.36135	0.203473	0.796527
OR2T3	9606.ENSP00000352604	OL	homo	OL	receptor	287	1	2879756	0.996	1.85714	0.27588	0.202441	0.797559
OR2T34	9606.ENSP00000330904	OL	homo	OL	receptor	287	1	2879756	0.996	1.85714	0.27588	0.202441	0.797559
OR10AG1	9606.ENSP00000311477	OL	homo	OL	receptor	287	1	2879756	0.996	4.10526	0.40882	0.201772	0.798228
OR10H3	9606.ENSP00000307130	OL	homo	OL	receptor	287	1	2879756	0.996	2.33333	0.30711	0.201051	0.798949
OR10H4	9606.ENSP00000318834	OL	homo	OL	receptor	287	1	2879756	0.996	2.33333	0.30711	0.201051	0.798949
OR51A2	9606.ENSP00000369729	OL	homo	OL	receptor	287	1	2879756	0.996	2.27273	0.30128	0.199846	0.800154
OR51A4	9606.ENSP00000369731	OL	homo	OL	receptor	287	1	2879756	0.996	2.27273	0.30128	0.199846	0.800154
OR4C11	9606.ENSP00000306651	OL	homo	OL	receptor	287	1	2879756	0.996	4.14286	0.4023	0.197651	0.802349
OR4C16	9606.ENSP00000324913	OL	homo	OL	receptor	287	1	2879756	0.996	4.14286	0.4023	0.197651	0.802349
OR5K4	9606.ENSP00000347003	OL	homo	OL	receptor	0	0	0	0	1.66667	0.25496	0.197491	0.802509
OR6T1	9606.ENSP00000325203	OL	homo	OL	receptor	287	1	2879756	0.996	1.4	0.22885	0.193414	0.806586
OR2L13	9606.ENSP00000355434	OL	homo	OL	receptor	287	1	2879756	0.996	4.78947	0.422	0.192827	0.807173
OR2L2	9606.ENSP00000355435	OL	homo	OL	receptor	287	1	2879756	0.996	4.78947	0.422	0.192827	0.807173
OR2L3	9606.ENSP00000353044	OL	homo	OL	receptor	287	1	2879756	0.996	4.78947	0.422	0.192827	0.807173
OR2L5	9606.ENSP00000347428	OL	homo	OL	receptor	287	1	2879756	0.996	4.78947	0.422	0.192827	0.807173
OR2L8	9606.ENSP00000349719	OL	homo	OL	receptor	287	1	2879756	0.996	4.78947	0.422	0.192827	0.807173
OR7A5	9606.ENSP00000316955	OL	homo	OL	receptor	287	1	2879756	0.996	5.28571	0.44183	0.192178	0.807822
OR7D4	9606.ENSP00000310488	OL	homo	OL	receptor	287	1	2879756	0.996	5.28571	0.44183	0.192178	0.807822
OR13A1	9606.ENSP00000311379	OL	homo	OL	receptor	0	0	0	0	3.25	0.3444	0.191039	0.808961
OR52K2	9606.ENSP00000318956	OL	homo	OL	receptor	287	1	2879756	0.996	2.375	0.29143	0.189105	0.810895
OR2T12	9606.ENSP00000324583	OL	homo	OL	receptor	287	1	2879756	0.996	3.57143	0.35016	0.185287	0.814713
OR2T33	9606.ENSP00000324687	OL	homo	OL	receptor	287	1	2879756	0.996	3.57143	0.35016	0.185287	0.814713
OR2T8	9606.ENSP00000326225	OL	homo	OL	receptor	0	0	0	0	3.57143	0.35016	0.185287	0.814713
OR5B12	9606.ENSP00000306657	OL	homo	OL	receptor	287	1	2879756	0.996	5.2	0.41424	0.181656	0.818344
OR5B17	9606.ENSP00000349945	OL	homo	OL	receptor	287	1	2879756	0.996	5.2	0.41424	0.181656	0.818344
OR5B2	9606.ENSP00000303076	OL	homo	OL	receptor	287	1	2879756	0.996	5.2	0.41424	0.181656	0.818344
OR5B3	9606.ENSP00000308270	OL	homo	OL	receptor	287	1	2879756	0.996	5.2	0.41424	0.181656	0.818344
OR5W2	9606.ENSP00000342448	OL	homo	OL	receptor	287	1	2879756	0.996	4.15789	0.36906	0.180992	0.819008
OR2Y1	9606.ENSP00000312403	OL	homo	OL	receptor	287	1	2879756	0.996	3.625	0.3336	0.175215	0.824785
OR1F1	9606.ENSP00000305424	OL	homo	OL	receptor	287	1	2879756	0.996	3.86667	0.34287	0.174366	0.825634
OR5D18	9606.ENSP00000335025	OL	homo	OL	receptor	287	1	2879756	0.996	2.53846	0.27585	0.173136	0.826864
OR1L1	9606.ENSP00000362790	OL	homo	OL	receptor	287	1	2879756	0.996	1	0.17044	0.17044	0.82956
OR2J1	9606.ENSP00000366376	OL	homo	OL	receptor	287	1	2879756	0.996	1	0.17044	0.17044	0.82956
OR2W5	9606.ENSP00000355448	OL	homo	OL	receptor	0	0	0	0	1	0.17044	0.17044	0.82956
OR8G1	9606.ENSP00000344453	OL	homo	OL	receptor	0	0	0	0	4.85	0.3752	0.17037	0.82963
OR11L1	9606.ENSP00000348033	OL	homo	OL	receptor	0	0	0	0	2.27273	0.2473	0.16404	0.83596
OR5P2	9606.ENSP00000331823	OL	homo	OL	receptor	287	1	2879756	0.996	5.33333	0.37779	0.163588	0.836412
OR7G2	9606.ENSP00000303822	OL	homo	OL	receptor	287	1	2879756	0.996	4.36364	0.33374	0.159766	0.840234
OR7G3	9606.ENSP00000302867	OL	homo	OL	receptor	287	1	2879756	0.996	4.36364	0.33374	0.159766	0.840234
OR6C2	9606.ENSP00000323606	OL	homo	OL	receptor	287	1	2879756	0.996	7.68421	0.42721	0.154114	0.845886
OR8H2	9606.ENSP00000323982	OL	homo	OL	receptor	0	0	0	0	3.86667	0.30134	0.153246	0.846754
OR8H3	9606.ENSP00000323928	OL	homo	OL	receptor	0	0	0	0	3.86667	0.30134	0.153246	0.846754
OR8B2	9606.ENSP00000364152	OL	homo	OL	receptor	0	0	0	0	5.625	0.35322	0.148931	0.851069
OR8B3	9606.ENSP00000346611	OL	homo	OL	receptor	287	1	2879756	0.996	5.625	0.35322	0.148931	0.851069
OR5BU1	9606.ENSP00000339726	OL	homo	OL	receptor	0	0	0	0	3.58333	0.28127	0.148587	0.851413
OR5BF1	9606.ENSP00000324534	OL	homo	OL	receptor	287	1	2879756	0.996	5.5	0.33429	0.142542	0.857458
OR5AC2	9606.ENSP00000351466	OL	homo	OL	receptor	287	1	2879756	0.996	3.66667	0.26585	0.138836	0.861164
OR8K3	9606.ENSP00000323555	OL	homo	OL	receptor	0	0	0	0	5.76471	0.33176	0.138177	0.861823
OR4C5	9606.ENSP00000321338	OL	homo	OL	receptor	287	1	2879756	0.996	3.625	0.22273	0.116984	0.883016
OR2AK2	9606.ENSP00000355436	OL	homo	OL	receptor	287	1	2879756	0.996	4.28571	0.22571	0.109028	0.890972
OR2T10	9606.ENSP00000329210	OL	homo	OL	receptor	287	1	2879756	0.996	1	0.10754	0.10754	0.89246
OR4N4	9606.ENSP00000332500	OL	homo	OL	receptor	287	1	2879756	0.996	1	0.10754	0.10754	0.89246
OR52A4	9606.ENSP00000369727	OL	homo	OL	receptor	0	0	0	0	1	0.10754	0.10754	0.89246
OR5D16	9606.ENSP00000367649	OL	homo	OL	receptor	287	1	2879756	0.996	1	0.10754	0.10754	0.89246
OR8D1	9606.ENSP00000350474	OL	homo	OL	receptor	287	1	2879756	0.996	4	0.20946	0.10473	0.89527
OR7G1	9606.ENSP00000293614	OL	homo	OL	receptor	287	1	2879756	0.996	6.44444	0.22391	0.0882025	0.911797
OR5AT1	9606.ENSP00000355438	OL	homo	OL	receptor	0	0	0	0	19.5	0.30323	0.0686681	0.931332
OR5U1	9606.ENSP00000366365	OL	homo	OL	receptor	0	0	0	0	19.5	0.30323	0.0686681	0.931332
OR5AY1	9606.ENSP00000283225	OL	homo	OL	receptor	287	1	2879756	0.996	19.5	0.30323	0.0686681	0.931332
OR5AV1P	9606.ENSP00000355442	OL	homo	OL	receptor	0	0	0	0	19.5	0.30323	0.0686681	0.931332
OR7A2P	9606.ENSP00000307397	OL	homo	OL	receptor	0	0	0	0	NA	NA	NA	NA
ZNF650	9606.ENSP00000272793	OL-AC	homo	OL	accessory	0	0	0	0	1.54054	0.87658	0.706244	0.293756
MKKS	9606.ENSP00000246062	OL-AC	homo	OL	accessory	0	0	0	0	1.86792	0.95899	0.701673	0.298327
GNAS	9606.ENSP00000302237	OL-AC	homo	OL	accessory	133	0.1753	645414	0.5142	2.11765	0.85792	0.589549	0.410451
CNGB1	9606.ENSP00000251102	OL-AC	homo	OL	accessory	18	0.2876	274444	0.554	2.32353	0.82839	0.543451	0.456549
CNGA2	9606.ENSP00000328478	OL-AC	homo	OL	accessory	1	0	180000	0.2876	3.67568	0.87579	0.456805	0.543195
CNGA4	9606.ENSP00000369268	OL-AC	homo	OL	accessory	12	0.5	310000	0.5305	3.67568	0.87579	0.456805	0.543195
BEST2	9606.ENSP00000042931	OL-AC	homo	OL	accessory	0	0	0	0	3.96875	0.80398	0.40357	0.59643
GJB4	9606.ENSP00000345868	OL-AC	homo	OL	accessory	0	0	0	0	1.91667	0.4823	0.348372	0.651628
ADCY3	9606.ENSP00000260600	OL-AC	homo	OL	accessory	115	0.3204	966957	0.4812	7.94595	0.86441	0.306653	0.693347
OBP2B	9606.ENSP00000361104	OL-AC	homo	OL	accessory	0	0	0	0	1	0.30189	0.30189	0.69811
SLC6A3	9606.ENSP00000270349	OL-AC	homo	OL	accessory	1	0	290000	0.1355	8.58333	0.87023	0.297034	0.702966
BBS4	9606.ENSP00000268057	OL-AC	homo	OL	accessory	8	0.5714	226250	0.9634	12.6981	0.9237	0.259216	0.740784
B3GNT2	9606.ENSP00000305595	OL-AC	homo	OL	accessory	16	0.975	191875	0.7585	11.1842	0.86453	0.25851	0.74149
OBP2A	9606.ENSP00000342097	OL-AC	homo	OL	accessory	0	0	0	0	1	0.21507	0.21507	0.78493
UGT2A1	9606.ENSP00000286604	OL-AC	homo	OL	accessory	53	0.3861	354906	0.501	15.0682	0.79666	0.205231	0.794769
GRM7	9606.ENSP00000373352	OL-AC	homo	OL	accessory	9	0.6111	237778	0.6596	41.0882	0.67551	0.105384	0.894616
GRM8	9606.ENSP00000351142	OL-AC	homo	OL	accessory	7	1	121429	0.7576	41.0882	0.67551	0.105384	0.894616
DRD2	9606.ENSP00000347474	OL-AC	homo	OL	accessory	8	0.1786	547500	0.2434	140.412	0.84789	0.0715546	0.928445
TAS1R1	9606.ENSP00000331867	TS1	homo	TS1	receptor	1	0	30000	0.3333	41.0882	0.67551	0.105384	0.894616
TAS1R2	9606.ENSP00000364520	TS1	homo	TS1	receptor	2	10000	680000	0.2543	41.0882	0.67551	0.105384	0.894616
TAS1R3	9606.ENSP00000344411	TS1	homo	TS1	receptor	3	0.3333	453333	0.3918	41.0882	0.67551	0.105384	0.894616
TAS2R3	9606.ENSP00000247879	TS2	homo	TS2	receptor	0	0	0	0	1	0.42013	0.42013	0.57987
TAS2R4	9606.ENSP00000247881	TS2	homo	TS2	receptor	0	0	0	0	1	0.42013	0.42013	0.57987
TAS2R1	9606.ENSP00000304138	TS2	homo	TS2	receptor	0	0	0	0	1	0.40943	0.40943	0.59057
TAS2R38	9606.ENSP00000331291	TS2	homo	TS2	receptor	0	0	0	0	1.125	0.42001	0.395989	0.604011
TAS2R60	9606.ENSP00000327724	TS2	homo	TS2	receptor	0	0	0	0	1	0.35723	0.35723	0.64277
TAS2R42	9606.ENSP00000334050	TS2	homo	TS2	receptor	0	0	0	0	1	0.34088	0.34088	0.65912
TAS2R5	9606.ENSP00000247883	TS2	homo	TS2	receptor	0	0	0	0	1	0.34088	0.34088	0.65912
TAS2R16	9606.ENSP00000249284	TS2	homo	TS2	receptor	0	0	0	0	1.25	0.37712	0.337306	0.662694
TAS2R7	9606.ENSP00000240687	TS2	homo	TS2	receptor	0	0	0	0	1.66667	0.40036	0.310117	0.689883
TAS2R8	9606.ENSP00000240615	TS2	homo	TS2	receptor	0	0	0	0	1.66667	0.40036	0.310117	0.689883
TAS2R9	9606.ENSP00000240691	TS2	homo	TS2	receptor	0	0	0	0	1.66667	0.40036	0.310117	0.689883
TAS2R10	9606.ENSP00000240619	TS2	homo	TS2	receptor	0	0	0	0	1.92308	0.3692	0.266234	0.733766
TAS2R13	9606.ENSP00000375095	TS2	homo	TS2	receptor	0	0	0	0	1	0.24969	0.24969	0.75031
TAS2R50	9606.ENSP00000375093	TS2	homo	TS2	receptor	0	0	0	0	1	0.17044	0.17044	0.82956
TAS2R49	9606.ENSP00000375092	TS2	homo	TS2	receptor	0	0	0	0	2.71429	0.26508	0.160897	0.839103
TAS2R48	9606.ENSP00000375091	TS2	homo	TS2	receptor	0	0	0	0	1.33333	0.1613	0.13969	0.86031
TAS2R14	9606.ENSP00000375094	TS2	homo	TS2	receptor	0	0	0	0	3	0.16764	0.096787	0.903213
ITPR3	9606.ENSP00000363435	TS-AC	homo	TS	accessory	40	0.4	653000	0.3764	2.72222	0.86449	0.52396	0.47604
GNB1	9606.ENSP00000367872	TS-AC	homo	TS	accessory	457	0.4132	2077090	0.789	3.89796	0.91809	0.465015	0.534985
NPY	9606.ENSP00000242152	TS-AC	homo	TS	accessory	13	0.4744	188462	0.626	1.16	0.49274	0.457498	0.542502
P2RX3	9606.ENSP00000263314	TS-AC	homo	TS	accessory	14	10000	259286	0.6339	1.2	0.48912	0.446503	0.553497
PLCB2	9606.ENSP00000260402	TS-AC	homo	TS	accessory	109	0.2477	695872	0.4577	3.85714	0.86868	0.44231	0.55769
RTP3	9606.ENSP00000296142	TS-AC	homo	TS	accessory	0	0	0	0	1.05556	0.44549	0.433607	0.566393
RTP4	9606.ENSP00000259030	TS-AC	homo	TS	accessory	0	0	0	0	1.05556	0.44549	0.433607	0.566393
GNAT1	9606.ENSP00000232461	TS-AC	homo	TS	accessory	29	0.3473	633448	0.6119	7.38775	0.92493	0.340293	0.659707
LCN1	9606.ENSP00000360846	TS-AC	homo	TS	accessory	0	0	0	0	1.72222	0.41787	0.318417	0.681583
GNG13	9606.ENSP00000248150	TS-AC	homo	TS	accessory	26	0.9354	843462	0.5862	8.36364	0.83864	0.289987	0.710013
SCNN1A	9606.ENSP00000353292	TS-AC	homo	TS	accessory	6	0.6	476667	0.4372	9.67647	0.82691	0.265827	0.734173
SCNN1B	9606.ENSP00000302874	TS-AC	homo	TS	accessory	6	0.6	518333	0.4353	9.67647	0.82691	0.265827	0.734173
SCNN1D	9606.ENSP00000368393	TS-AC	homo	TS	accessory	0	0	0	0	9.67647	0.82691	0.265827	0.734173
SCNN1G	9606.ENSP00000300061	TS-AC	homo	TS	accessory	5	0.8	526000	0.3803	9.67647	0.82691	0.265827	0.734173
VN1R4	9606.ENSP00000310856	VN	homo	VN	receptor	0	0	0	0	4.77273	0.39563	0.181095	0.818905
VN1R1	9606.ENSP00000322339	VN	homo	VN	receptor	0	0	0	0	10.0909	0.21194	0.0667187	0.933281
VN1R2	9606.ENSP00000351244	VN	homo	VN	receptor	0	0	0	0	7.25	0.08449	0.0313788	0.968621
Olfr78	10090.ENSMUSP00000058085	OL	mus	OL	receptor	270	1	2711963	0.9938	1	0.42013	0.42013	0.57987
Olfr734	10090.ENSMUSP00000057376	OL	mus	OL	receptor	270	1	2711963	0.9938	1.0625	0.4269	0.414154	0.585846
Olfr575	10090.ENSMUSP00000081873	OL	mus	OL	receptor	0	0	0	0	1.0625	0.4269	0.414154	0.585846
Olfr723	10090.ENSMUSP00000073416	OL	mus	OL	receptor	270	1	2711963	0.9938	1.0625	0.4269	0.414154	0.585846
Olfr724	10090.ENSMUSP00000074546	OL	mus	OL	receptor	270	1	2711963	0.9938	1.0625	0.4269	0.414154	0.585846
Olfr734	10090.ENSMUSP00000057376	OL	mus	OL	receptor	270	1	2711963	0.9938	1.0625	0.4269	0.414154	0.585846
Olfr357	10090.ENSMUSP00000066272	OL	mus	OL	receptor	270	1	2711963	0.9938	1	0.40943	0.40943	0.59057
Olfr558	10090.ENSMUSP00000091674	OL	mus	OL	receptor	270	1	2711963	0.9938	1	0.40943	0.40943	0.59057
Olfr551	10090.ENSMUSP00000095827	OL	mus	OL	receptor	0	0	0	0	1.11765	0.42989	0.406635	0.593365
Olfr272	10090.ENSMUSP00000055721	OL	mus	OL	receptor	0	0	0	0	1.16667	0.43774	0.405268	0.594732
Olfr641	10090.ENSMUSP00000095785	OL	mus	OL	receptor	270	1	2711963	0.9938	1.21053	0.44551	0.40492	0.59508
Olfr1500	10090.ENSMUSP00000067303	OL	mus	OL	receptor	0	0	0	0	1.06667	0.4167	0.403467	0.596533
Olfr1020	10090.ENSMUSP00000058242	OL	mus	OL	receptor	270	1	2711963	0.9938	1.17647	0.4325	0.398745	0.601255
Olfr1420	10090.ENSMUSP00000072563	OL	mus	OL	receptor	270	1	2711963	0.9938	1	0.39793	0.39793	0.60207
Olfr1420	10090.ENSMUSP00000072563	OL	mus	OL	receptor	270	1	2711963	0.9938	1	0.39793	0.39793	0.60207
Olfr571	10090.ENSMUSP00000062385	OL	mus	OL	receptor	270	1	2711963	0.9938	1	0.39793	0.39793	0.60207
Olfr981	10090.ENSMUSP00000057952	OL	mus	OL	receptor	270	1	2711963	0.9938	1	0.39793	0.39793	0.60207
Olfr678	10090.ENSMUSP00000095763	OL	mus	OL	receptor	270	1	2711963	0.9938	1.22222	0.43676	0.395065	0.604935
Olfr1497	10090.ENSMUSP00000053465	OL	mus	OL	receptor	0	0	0	0	1.07143	0.40579	0.39203	0.60797
Olfr429	10090.ENSMUSP00000051323	OL	mus	OL	receptor	270	1	2711963	0.9938	1.31579	0.44776	0.390348	0.609652
Olfr220	10090.ENSMUSP00000083023	OL	mus	OL	receptor	0	0	0	0	1	0.38551	0.38551	0.61449
Olfr231	10090.ENSMUSP00000059596	OL	mus	OL	receptor	270	1	2711963	0.9938	1	0.38551	0.38551	0.61449
Olfr362	10090.ENSMUSP00000097722	OL	mus	OL	receptor	270	1	2711963	0.9938	1	0.38551	0.38551	0.61449
Olfr419	10090.ENSMUSP00000050893	OL	mus	OL	receptor	0	0	0	0	1	0.38551	0.38551	0.61449
Olfr513	10090.ENSMUSP00000050578	OL	mus	OL	receptor	0	0	0	0	1	0.38551	0.38551	0.61449
Olfr557	10090.ENSMUSP00000095821	OL	mus	OL	receptor	270	1	2711963	0.9938	1	0.38551	0.38551	0.61449
Olfr692	10090.ENSMUSP00000095755	OL	mus	OL	receptor	270	1	2711963	0.9938	1	0.38551	0.38551	0.61449
Olfr750	10090.ENSMUSP00000036596	OL	mus	OL	receptor	270	1	2711963	0.9938	1.13333	0.40947	0.384631	0.615369
Olfr1428	10090.ENSMUSP00000085126	OL	mus	OL	receptor	270	1	2711963	0.9938	1.07692	0.39407	0.379736	0.620264
Olfr720	10090.ENSMUSP00000046509	OL	mus	OL	receptor	0	0	0	0	1.07692	0.39407	0.379736	0.620264
Olfr729	10090.ENSMUSP00000051755	OL	mus	OL	receptor	270	1	2711963	0.9938	1.07692	0.39407	0.379736	0.620264
Olfr878	10090.ENSMUSP00000083228	OL	mus	OL	receptor	270	1	2711963	0.9938	1.07692	0.39407	0.379736	0.620264
Olfr1406	10090.ENSMUSP00000072231	OL	mus	OL	receptor	0	0	0	0	1.29412	0.43067	0.37858	0.62142
Olfr1408	10090.ENSMUSP00000073345	OL	mus	OL	receptor	0	0	0	0	1.29412	0.43067	0.37858	0.62142
Olfr24	10090.ENSMUSP00000064189	OL	mus	OL	receptor	270	1	2711963	0.9938	1.14286	0.40326	0.377215	0.622785
Olfr555	10090.ENSMUSP00000095823	OL	mus	OL	receptor	270	1	2711963	0.9938	1.14286	0.40326	0.377215	0.622785
Olfr609	10090.ENSMUSP00000051749	OL	mus	OL	receptor	0	0	0	0	1.2	0.41257	0.376623	0.623377
Olfr577	10090.ENSMUSP00000059586	OL	mus	OL	receptor	270	1	2711963	0.9938	1.2	0.41257	0.376623	0.623377
Olfr609	10090.ENSMUSP00000051749	OL	mus	OL	receptor	0	0	0	0	1.2	0.41257	0.376623	0.623377
Olfr152	10090.ENSMUSP00000088211	OL	mus	OL	receptor	270	1	2711963	0.9938	1.25	0.41769	0.373593	0.626407
Olfr631	10090.ENSMUSP00000059317	OL	mus	OL	receptor	270	1	2711963	0.9938	1	0.37201	0.37201	0.62799
Olfr631	10090.ENSMUSP00000059317	OL	mus	OL	receptor	270	1	2711963	0.9938	1	0.37201	0.37201	0.62799
Olfr745	10090.ENSMUSP00000050184	OL	mus	OL	receptor	0	0	0	0	1	0.37201	0.37201	0.62799
Olfr59	10090.ENSMUSP00000079351	OL	mus	OL	receptor	0	0	0	0	1.35294	0.43034	0.369975	0.630025
Olfr646	10090.ENSMUSP00000095784	OL	mus	OL	receptor	270	1	2711963	0.9938	1.35294	0.42681	0.36694	0.63306
Olfr646	10090.ENSMUSP00000095784	OL	mus	OL	receptor	270	1	2711963	0.9938	1.35294	0.42681	0.36694	0.63306
Olfr578	10090.ENSMUSP00000058167	OL	mus	OL	receptor	270	1	2711963	0.9938	1.08333	0.38139	0.366428	0.633572
Olfr730	10090.ENSMUSP00000060325	OL	mus	OL	receptor	270	1	2711963	0.9938	1.08333	0.38139	0.366428	0.633572
Olfr30	10090.ENSMUSP00000055961	OL	mus	OL	receptor	0	0	0	0	1.42105	0.43662	0.366268	0.633732
Olfr1396	10090.ENSMUSP00000056876	OL	mus	OL	receptor	270	1	2711963	0.9938	1.26667	0.41153	0.365654	0.634346
Olfr728	10090.ENSMUSP00000052079	OL	mus	OL	receptor	270	1	2711963	0.9938	1.26667	0.41153	0.365654	0.634346
Olfr1490	10090.ENSMUSP00000079057	OL	mus	OL	receptor	270	1	2711963	0.9938	1.21429	0.4016	0.364445	0.635555
Olfr574	10090.ENSMUSP00000095815	OL	mus	OL	receptor	270	1	2711963	0.9938	1.21429	0.4016	0.364445	0.635555
Olfr664	10090.ENSMUSP00000065722	OL	mus	OL	receptor	270	1	2711963	0.9938	1.15385	0.39146	0.364429	0.635571
Olfr677	10090.ENSMUSP00000095764	OL	mus	OL	receptor	270	1	2711963	0.9938	1.41176	0.43032	0.362169	0.637831
Olfr561	10090.ENSMUSP00000095819	OL	mus	OL	receptor	0	0	0	0	1.15385	0.38604	0.359383	0.640617
Olfr1310	10090.ENSMUSP00000097197	OL	mus	OL	receptor	270	1	2711963	0.9938	1	0.35723	0.35723	0.64277
Olfr267	10090.ENSMUSP00000062002	OL	mus	OL	receptor	270	1	2711963	0.9938	1	0.35723	0.35723	0.64277
Olfr354	10090.ENSMUSP00000068986	OL	mus	OL	receptor	270	1	2711963	0.9938	1	0.35723	0.35723	0.64277
Olfr368	10090.ENSMUSP00000054082	OL	mus	OL	receptor	270	1	2711963	0.9938	1	0.35723	0.35723	0.64277
Olfr984	10090.ENSMUSP00000060787	OL	mus	OL	receptor	270	1	2711963	0.9938	1	0.35723	0.35723	0.64277
Olfr370	10090.ENSMUSP00000055435	OL	mus	OL	receptor	270	1	2711963	0.9938	1.5	0.43662	0.356499	0.643501
Olfr1264	10090.ENSMUSP00000097347	OL	mus	OL	receptor	270	1	2711963	0.9938	1.33333	0.411	0.355937	0.644063
Olfr140	10090.ENSMUSP00000097346	OL	mus	OL	receptor	0	0	0	0	1.33333	0.411	0.355937	0.644063
Olfr417	10090.ENSMUSP00000083024	OL	mus	OL	receptor	0	0	0	0	1.33333	0.411	0.355937	0.644063
Olfr553	10090.ENSMUSP00000095825	OL	mus	OL	receptor	0	0	0	0	1.375	0.4172	0.355789	0.644211
Olfr554	10090.ENSMUSP00000095824	OL	mus	OL	receptor	270	1	2711963	0.9938	1.375	0.4172	0.355789	0.644211
Olfr71	10090.ENSMUSP00000060230	OL	mus	OL	receptor	0	0	0	0	1.3125	0.40702	0.355276	0.644724
Olfr958	10090.ENSMUSP00000049930	OL	mus	OL	receptor	0	0	0	0	1.09091	0.36759	0.35194	0.64806
Olfr1162	10090.ENSMUSP00000097425	OL	mus	OL	receptor	270	1	2711963	0.9938	1.23077	0.38982	0.351379	0.648621
Olfr1163	10090.ENSMUSP00000097423	OL	mus	OL	receptor	270	1	2711963	0.9938	1.23077	0.38982	0.351379	0.648621
Olfr685	10090.ENSMUSP00000061561	OL	mus	OL	receptor	270	1	2711963	0.9938	1.23077	0.38982	0.351379	0.648621
Olfr1046	10090.ENSMUSP00000097486	OL	mus	OL	receptor	0	0	0	0	1.16667	0.3787	0.350608	0.649392
Olfr665	10090.ENSMUSP00000095768	OL	mus	OL	receptor	0	0	0	0	1.57895	0.43623	0.347161	0.652839
Olfr666	10090.ENSMUSP00000079893	OL	mus	OL	receptor	270	1	2711963	0.9938	1.57895	0.43623	0.347161	0.652839
Olfr1309	10090.ENSMUSP00000097199	OL	mus	OL	receptor	270	1	2711963	0.9938	1.52941	0.42477	0.343472	0.656528
Olfr1311	10090.ENSMUSP00000097196	OL	mus	OL	receptor	0	0	0	0	1.52941	0.42477	0.343472	0.656528
Olfr149	10090.ENSMUSP00000080686	OL	mus	OL	receptor	0	0	0	0	1.52941	0.42477	0.343472	0.656528
Olfr934	10090.ENSMUSP00000073835	OL	mus	OL	receptor	0	0	0	0	1.52941	0.42477	0.343472	0.656528
Olfr934	10090.ENSMUSP00000073835	OL	mus	OL	receptor	0	0	0	0	1.52941	0.42477	0.343472	0.656528
Olfr959	10090.ENSMUSP00000078176	OL	mus	OL	receptor	0	0	0	0	1.52941	0.42477	0.343472	0.656528
Olfr747	10090.ENSMUSP00000077220	OL	mus	OL	receptor	0	0	0	0	1.28571	0.38867	0.342775	0.657225
Olfr749	10090.ENSMUSP00000074242	OL	mus	OL	receptor	0	0	0	0	1.28571	0.38867	0.342775	0.657225
Olfr552	10090.ENSMUSP00000095826	OL	mus	OL	receptor	270	1	2711963	0.9938	1.55556	0.42629	0.341792	0.658208
Olfr1112	10090.ENSMUSP00000052341	OL	mus	OL	receptor	270	1	2711963	0.9938	1	0.34088	0.34088	0.65912
Olfr1444	10090.ENSMUSP00000062460	OL	mus	OL	receptor	0	0	0	0	1	0.34088	0.34088	0.65912
Olfr95	10090.ENSMUSP00000058929	OL	mus	OL	receptor	270	1	2711963	0.9938	1	0.34088	0.34088	0.65912
Olfr982	10090.ENSMUSP00000052705	OL	mus	OL	receptor	270	1	2711963	0.9938	1	0.34088	0.34088	0.65912
Olfr576	10090.ENSMUSP00000095814	OL	mus	OL	receptor	270	1	2711963	0.9938	1.35714	0.39593	0.339865	0.660135
Olfr746	10090.ENSMUSP00000079451	OL	mus	OL	receptor	0	0	0	0	1.4	0.40064	0.338603	0.661397
Olfr748	10090.ENSMUSP00000073251	OL	mus	OL	receptor	0	0	0	0	1.4	0.40064	0.338603	0.661397
Olfr1512	10090.ENSMUSP00000071208	OL	mus	OL	receptor	270	1	2711963	0.9938	1.25	0.37712	0.337306	0.662694
Olfr1513	10090.ENSMUSP00000087171	OL	mus	OL	receptor	0	0	0	0	1.25	0.37712	0.337306	0.662694
Olfr31	10090.ENSMUSP00000098434	OL	mus	OL	receptor	270	1	2711963	0.9938	1.1	0.35246	0.336057	0.663943
Olfr399	10090.ENSMUSP00000056508	OL	mus	OL	receptor	270	1	2711963	0.9938	1.1	0.35246	0.336057	0.663943
Olfr420	10090.ENSMUSP00000069662	OL	mus	OL	receptor	270	1	2711963	0.9938	1.1	0.35246	0.336057	0.663943
Olfr924	10090.ENSMUSP00000072744	OL	mus	OL	receptor	270	1	2711963	0.9938	1.25	0.37171	0.332468	0.667532
Olfr926	10090.ENSMUSP00000077405	OL	mus	OL	receptor	270	1	2711963	0.9938	1.25	0.37171	0.332468	0.667532
Olfr308	10090.ENSMUSP00000049454	OL	mus	OL	receptor	270	1	2711963	0.9938	1.42857	0.39618	0.331468	0.668532
Olfr523	10090.ENSMUSP00000052678	OL	mus	OL	receptor	0	0	0	0	1.42857	0.39618	0.331468	0.668532
Olfr479	10090.ENSMUSP00000056631	OL	mus	OL	receptor	0	0	0	0	1.64706	0.42479	0.330994	0.669006
Olfr509	10090.ENSMUSP00000053819	OL	mus	OL	receptor	0	0	0	0	1.64706	0.42479	0.330994	0.669006
Olfr1032	10090.ENSMUSP00000054494	OL	mus	OL	receptor	270	1	2711963	0.9938	1.53333	0.40811	0.329579	0.670421
Olfr1033	10090.ENSMUSP00000058779	OL	mus	OL	receptor	270	1	2711963	0.9938	1.53333	0.40811	0.329579	0.670421
Olfr1006	10090.ENSMUSP00000097501	OL	mus	OL	receptor	0	0	0	0	1.53333	0.40458	0.326728	0.673272
Olfr1006	10090.ENSMUSP00000097501	OL	mus	OL	receptor	0	0	0	0	1.53333	0.40458	0.326728	0.673272
Olfr640	10090.ENSMUSP00000081858	OL	mus	OL	receptor	270	1	2711963	0.9938	1.5625	0.40686	0.325488	0.674512
Olfr642	10090.ENSMUSP00000061462	OL	mus	OL	receptor	0	0	0	0	1.5625	0.40686	0.325488	0.674512
Olfr643	10090.ENSMUSP00000073707	OL	mus	OL	receptor	0	0	0	0	1.5625	0.40686	0.325488	0.674512
Olfr644	10090.ENSMUSP00000076633	OL	mus	OL	receptor	0	0	0	0	1.5625	0.40686	0.325488	0.674512
Olfr424	10090.ENSMUSP00000054305	OL	mus	OL	receptor	0	0	0	0	1.5	0.39678	0.32397	0.67603
Olfr1255	10090.ENSMUSP00000060602	OL	mus	OL	receptor	0	0	0	0	1.625	0.41135	0.322689	0.677311
Olfr1259	10090.ENSMUSP00000088194	OL	mus	OL	receptor	270	1	2711963	0.9938	1.625	0.41135	0.322689	0.677311
Olfr48	10090.ENSMUSP00000097350	OL	mus	OL	receptor	0	0	0	0	1.625	0.41135	0.322689	0.677311
Olfr124	10090.ENSMUSP00000050544	OL	mus	OL	receptor	0	0	0	0	1	0.32261	0.32261	0.67739
Olfr221	10090.ENSMUSP00000063109	OL	mus	OL	receptor	270	1	2711963	0.9938	1	0.32261	0.32261	0.67739
Olfr414	10090.ENSMUSP00000052426	OL	mus	OL	receptor	270	1	2711963	0.9938	1.27273	0.36334	0.322066	0.677934
Olfr432	10090.ENSMUSP00000060341	OL	mus	OL	receptor	0	0	0	0	1.64706	0.41281	0.321659	0.678341
Olfr433	10090.ENSMUSP00000056772	OL	mus	OL	receptor	0	0	0	0	1.64706	0.41281	0.321659	0.678341
Olfr821	10090.ENSMUSP00000056626	OL	mus	OL	receptor	0	0	0	0	1.33333	0.3713	0.321556	0.678444
Olfr1104	10090.ENSMUSP00000097454	OL	mus	OL	receptor	0	0	0	0	1.2	0.34967	0.319204	0.680796
Olfr1404	10090.ENSMUSP00000050406	OL	mus	OL	receptor	0	0	0	0	1.2	0.34967	0.319204	0.680796
Olfr218	10090.ENSMUSP00000053317	OL	mus	OL	receptor	270	1	2711963	0.9938	1.2	0.34967	0.319204	0.680796
Olfr568	10090.ENSMUSP00000095818	OL	mus	OL	receptor	270	1	2711963	0.9938	1.11111	0.33572	0.318492	0.681508
Olfr1288	10090.ENSMUSP00000059005	OL	mus	OL	receptor	0	0	0	0	1.11111	0.33572	0.318492	0.681508
Olfr568	10090.ENSMUSP00000095818	OL	mus	OL	receptor	270	1	2711963	0.9938	1.11111	0.33572	0.318492	0.681508
Olfr566	10090.ENSMUSP00000071344	OL	mus	OL	receptor	0	0	0	0	1.57143	0.39765	0.317215	0.682785
Olfr583	10090.ENSMUSP00000095812	OL	mus	OL	receptor	0	0	0	0	1.57143	0.39765	0.317215	0.682785
Olfr713	10090.ENSMUSP00000095743	OL	mus	OL	receptor	270	1	2711963	0.9938	1.76471	0.42013	0.316262	0.683738
Olfr714	10090.ENSMUSP00000095742	OL	mus	OL	receptor	0	0	0	0	1.76471	0.42013	0.316262	0.683738
Olfr635	10090.ENSMUSP00000095788	OL	mus	OL	receptor	270	1	2711963	0.9938	1.66667	0.40686	0.315152	0.684848
Olfr635	10090.ENSMUSP00000095788	OL	mus	OL	receptor	270	1	2711963	0.9938	1.66667	0.40686	0.315152	0.684848
Olfr638	10090.ENSMUSP00000095786	OL	mus	OL	receptor	270	1	2711963	0.9938	1.66667	0.40686	0.315152	0.684848
Olfr1029	10090.ENSMUSP00000080828	OL	mus	OL	receptor	0	0	0	0	1.46154	0.38034	0.314606	0.685394
Olfr1030	10090.ENSMUSP00000053309	OL	mus	OL	receptor	0	0	0	0	1.46154	0.38034	0.314606	0.685394
Olfr1044	10090.ENSMUSP00000097490	OL	mus	OL	receptor	0	0	0	0	1.83333	0.42395	0.313108	0.686892
Olfr52	10090.ENSMUSP00000097489	OL	mus	OL	receptor	0	0	0	0	1.83333	0.42395	0.313108	0.686892
Olfr653	10090.ENSMUSP00000095776	OL	mus	OL	receptor	0	0	0	0	1.2	0.3429	0.313023	0.686977
Olfr1364	10090.ENSMUSP00000059544	OL	mus	OL	receptor	0	0	0	0	1.75	0.41319	0.312342	0.687658
Olfr179	10090.ENSMUSP00000071913	OL	mus	OL	receptor	270	1	2711963	0.9938	1.75	0.41319	0.312342	0.687658
Olfr722	10090.ENSMUSP00000059721	OL	mus	OL	receptor	270	1	2711963	0.9938	1.88235	0.42672	0.311023	0.688977
Olfr732	10090.ENSMUSP00000075285	OL	mus	OL	receptor	270	1	2711963	0.9938	1.88235	0.42672	0.311023	0.688977
Olfr733	10090.ENSMUSP00000071195	OL	mus	OL	receptor	0	0	0	0	1.88235	0.42672	0.311023	0.688977
Olfr1052	10090.ENSMUSP00000058454	OL	mus	OL	receptor	270	1	2711963	0.9938	1.82353	0.41787	0.309446	0.690554
Olfr1106	10090.ENSMUSP00000097452	OL	mus	OL	receptor	0	0	0	0	1.82353	0.41787	0.309446	0.690554
Olfr617	10090.ENSMUSP00000040319	OL	mus	OL	receptor	0	0	0	0	1.82353	0.41651	0.308439	0.691561
Olfr619	10090.ENSMUSP00000095798	OL	mus	OL	receptor	0	0	0	0	1.82353	0.41651	0.308439	0.691561
Olfr67	10090.ENSMUSP00000091670	OL	mus	OL	receptor	0	0	0	0	1.82353	0.41651	0.308439	0.691561
Olfr715	10090.ENSMUSP00000079834	OL	mus	OL	receptor	270	1	2711963	0.9938	1.53846	0.38137	0.30747	0.69253
Olfr17	10090.ENSMUSP00000095741	OL	mus	OL	receptor	270	1	2711963	0.9938	1.5	0.37655	0.307452	0.692548
Olfr802	10090.ENSMUSP00000074275	OL	mus	OL	receptor	270	1	2711963	0.9938	1.88235	0.42	0.306125	0.693875
Olfr786	10090.ENSMUSP00000075827	OL	mus	OL	receptor	270	1	2711963	0.9938	1.88235	0.42	0.306125	0.693875
Olfr802	10090.ENSMUSP00000074275	OL	mus	OL	receptor	270	1	2711963	0.9938	1.88235	0.42	0.306125	0.693875
Olfr169	10090.ENSMUSP00000087516	OL	mus	OL	receptor	270	1	2711963	0.9938	1.36364	0.35737	0.306033	0.693967
Olfr170	10090.ENSMUSP00000077674	OL	mus	OL	receptor	0	0	0	0	1.36364	0.35737	0.306033	0.693967
Olfr171	10090.ENSMUSP00000078814	OL	mus	OL	receptor	0	0	0	0	1.36364	0.35737	0.306033	0.693967
Olfr287	10090.ENSMUSP00000097806	OL	mus	OL	receptor	270	1	2711963	0.9938	1.64286	0.3917	0.3056	0.6944
Olfr286	10090.ENSMUSP00000073296	OL	mus	OL	receptor	270	1	2711963	0.9938	1.64286	0.3917	0.3056	0.6944
Olfr1510	10090.ENSMUSP00000078424	OL	mus	OL	receptor	270	1	2711963	0.9938	1.3	0.3483	0.305479	0.694521
Olfr1511	10090.ENSMUSP00000077302	OL	mus	OL	receptor	270	1	2711963	0.9938	1.3	0.3483	0.305479	0.694521
Olfr985	10090.ENSMUSP00000058372	OL	mus	OL	receptor	270	1	2711963	0.9938	1.53333	0.37788	0.305166	0.694834
Olfr1093	10090.ENSMUSP00000049733	OL	mus	OL	receptor	0	0	0	0	1.82353	0.41093	0.304307	0.695693
Olfr1094	10090.ENSMUSP00000052802	OL	mus	OL	receptor	270	1	2711963	0.9938	1.82353	0.41093	0.304307	0.695693
Olfr1102	10090.ENSMUSP00000052861	OL	mus	OL	receptor	0	0	0	0	1.82353	0.41093	0.304307	0.695693
Olfr1034	10090.ENSMUSP00000078279	OL	mus	OL	receptor	270	1	2711963	0.9938	1.53333	0.37586	0.303535	0.696465
Olfr1036	10090.ENSMUSP00000080065	OL	mus	OL	receptor	270	1	2711963	0.9938	1.53333	0.37586	0.303535	0.696465
Olfr1303	10090.ENSMUSP00000097204	OL	mus	OL	receptor	270	1	2711963	0.9938	1.53846	0.37468	0.302077	0.697923
Olfr1323	10090.ENSMUSP00000050768	OL	mus	OL	receptor	0	0	0	0	1	0.30189	0.30189	0.69811
Olfr670	10090.ENSMUSP00000060289	OL	mus	OL	receptor	0	0	0	0	1	0.30189	0.30189	0.69811
Olfr15	10090.ENSMUSP00000079720	OL	mus	OL	receptor	270	1	2711963	0.9938	1.36364	0.35196	0.3014	0.6986
Olfr15	10090.ENSMUSP00000079720	OL	mus	OL	receptor	270	1	2711963	0.9938	1.36364	0.35196	0.3014	0.6986
Olfr825	10090.ENSMUSP00000076091	OL	mus	OL	receptor	0	0	0	0	2.2	0.44684	0.301259	0.698741
Olfr826	10090.ENSMUSP00000077436	OL	mus	OL	receptor	0	0	0	0	2.2	0.44684	0.301259	0.698741
Olfr827	10090.ENSMUSP00000089609	OL	mus	OL	receptor	0	0	0	0	2.2	0.44684	0.301259	0.698741
Olfr603	10090.ENSMUSP00000071744	OL	mus	OL	receptor	0	0	0	0	1.22222	0.33291	0.301129	0.698871
Olfr814	10090.ENSMUSP00000080106	OL	mus	OL	receptor	0	0	0	0	1.61538	0.38267	0.301084	0.698916
Olfr815	10090.ENSMUSP00000071488	OL	mus	OL	receptor	0	0	0	0	1.61538	0.38267	0.301084	0.698916
Olfr1156	10090.ENSMUSP00000097430	OL	mus	OL	receptor	270	1	2711963	0.9938	2.05556	0.43155	0.301	0.699
Olfr1157	10090.ENSMUSP00000097429	OL	mus	OL	receptor	270	1	2711963	0.9938	2.05556	0.43155	0.301	0.699
Olfr76	10090.ENSMUSP00000085124	OL	mus	OL	receptor	270	1	2711963	0.9938	1.64706	0.38435	0.299483	0.700517
Olfr1045	10090.ENSMUSP00000097488	OL	mus	OL	receptor	0	0	0	0	2.15	0.43903	0.299416	0.700584
Olfr1057	10090.ENSMUSP00000097477	OL	mus	OL	receptor	0	0	0	0	2.15	0.43903	0.299416	0.700584
Olfr1301	10090.ENSMUSP00000078993	OL	mus	OL	receptor	0	0	0	0	1.75	0.39556	0.299015	0.700985
Olfr1361	10090.ENSMUSP00000062356	OL	mus	OL	receptor	0	0	0	0	1.75	0.39556	0.299015	0.700985
Olfr1362	10090.ENSMUSP00000061660	OL	mus	OL	receptor	0	0	0	0	1.75	0.39556	0.299015	0.700985
Olfr225	10090.ENSMUSP00000051482	OL	mus	OL	receptor	0	0	0	0	1.75	0.39556	0.299015	0.700985
Olfr225	10090.ENSMUSP00000051482	OL	mus	OL	receptor	0	0	0	0	1.75	0.39556	0.299015	0.700985
Olfr808	10090.ENSMUSP00000059714	OL	mus	OL	receptor	0	0	0	0	1.125	0.31698	0.298852	0.701148
Olfr1341	10090.ENSMUSP00000095522	OL	mus	OL	receptor	0	0	0	0	1.125	0.31698	0.298852	0.701148
Olfr1395	10090.ENSMUSP00000050142	OL	mus	OL	receptor	0	0	0	0	1.125	0.31698	0.298852	0.701148
Olfr16	10090.ENSMUSP00000041524	OL	mus	OL	receptor	270	1	2711963	0.9938	1.125	0.31698	0.298852	0.701148
Olfr1395	10090.ENSMUSP00000050142	OL	mus	OL	receptor	0	0	0	0	1.125	0.31698	0.298852	0.701148
Olfr735	10090.ENSMUSP00000056851	OL	mus	OL	receptor	270	1	2711963	0.9938	1.125	0.31698	0.298852	0.701148
Olfr808	10090.ENSMUSP00000059714	OL	mus	OL	receptor	0	0	0	0	1.125	0.31698	0.298852	0.701148
Olfr94	10090.ENSMUSP00000055232	OL	mus	OL	receptor	270	1	2711963	0.9938	1.125	0.31698	0.298852	0.701148
Olfr1265	10090.ENSMUSP00000079190	OL	mus	OL	receptor	270	1	2711963	0.9938	1.8	0.39875	0.297211	0.702789
Olfr1269	10090.ENSMUSP00000097345	OL	mus	OL	receptor	270	1	2711963	0.9938	1.8	0.39875	0.297211	0.702789
Olfr1279	10090.ENSMUSP00000087801	OL	mus	OL	receptor	0	0	0	0	1.45455	0.35786	0.296721	0.703279
Olfr1284	10090.ENSMUSP00000052153	OL	mus	OL	receptor	0	0	0	0	1.45455	0.35786	0.296721	0.703279
Olfr809	10090.ENSMUSP00000054949	OL	mus	OL	receptor	0	0	0	0	1.45455	0.35786	0.296721	0.703279
Olfr813	10090.ENSMUSP00000063431	OL	mus	OL	receptor	0	0	0	0	1.45455	0.35786	0.296721	0.703279
Olfr13	10090.ENSMUSP00000053813	OL	mus	OL	receptor	270	1	2711963	0.9938	1.4	0.34798	0.294097	0.705903
Olfr447	10090.ENSMUSP00000052312	OL	mus	OL	receptor	0	0	0	0	1.4	0.34798	0.294097	0.705903
Olfr151	10090.ENSMUSP00000072257	OL	mus	OL	receptor	270	1	2711963	0.9938	1.64286	0.37653	0.293764	0.706236
Olfr273	10090.ENSMUSP00000052080	OL	mus	OL	receptor	0	0	0	0	1.8	0.39339	0.293216	0.706784
Olfr763	10090.ENSMUSP00000076671	OL	mus	OL	receptor	0	0	0	0	1.61538	0.37243	0.293027	0.706973
Olfr796	10090.ENSMUSP00000040207	OL	mus	OL	receptor	270	1	2711963	0.9938	1.61538	0.37243	0.293027	0.706973
Olfr9	10090.ENSMUSP00000089622	OL	mus	OL	receptor	0	0	0	0	1.61538	0.37243	0.293027	0.706973
Olfr1366	10090.ENSMUSP00000061102	OL	mus	OL	receptor	0	0	0	0	1.3	0.33175	0.290964	0.709036
Olfr1037	10090.ENSMUSP00000097495	OL	mus	OL	receptor	0	0	0	0	1.875	0.39768	0.290424	0.709576
Olfr1097	10090.ENSMUSP00000097458	OL	mus	OL	receptor	0	0	0	0	1.875	0.39768	0.290424	0.709576
Olfr1098	10090.ENSMUSP00000097457	OL	mus	OL	receptor	0	0	0	0	1.875	0.39768	0.290424	0.709576
Olfr1099	10090.ENSMUSP00000097456	OL	mus	OL	receptor	0	0	0	0	1.875	0.39768	0.290424	0.709576
Olfr1099	10090.ENSMUSP00000097456	OL	mus	OL	receptor	0	0	0	0	1.875	0.39768	0.290424	0.709576
Olfr2	10090.ENSMUSP00000091656	OL	mus	OL	receptor	270	1	2711963	0.9938	2.38095	0.44725	0.289851	0.710149
Olfr449	10090.ENSMUSP00000059233	OL	mus	OL	receptor	270	1	2711963	0.9938	2.38095	0.44725	0.289851	0.710149
Olfr522	10090.ENSMUSP00000057288	OL	mus	OL	receptor	0	0	0	0	2.38095	0.44725	0.289851	0.710149
Olfr6	10090.ENSMUSP00000048740	OL	mus	OL	receptor	0	0	0	0	2.38095	0.44725	0.289851	0.710149
Olfr711	10090.ENSMUSP00000055724	OL	mus	OL	receptor	270	1	2711963	0.9938	2.38095	0.44725	0.289851	0.710149
Olfr683	10090.ENSMUSP00000060527	OL	mus	OL	receptor	0	0	0	0	2.35	0.44314	0.289073	0.710927
Olfr684	10090.ENSMUSP00000055880	OL	mus	OL	receptor	270	1	2711963	0.9938	2.35	0.44314	0.289073	0.710927
Olfr1499	10090.ENSMUSP00000059747	OL	mus	OL	receptor	0	0	0	0	1.9375	0.40137	0.288353	0.711647
Olfr1505	10090.ENSMUSP00000080235	OL	mus	OL	receptor	0	0	0	0	1.9375	0.40137	0.288353	0.711647
Olfr591	10090.ENSMUSP00000073884	OL	mus	OL	receptor	0	0	0	0	1.33333	0.33174	0.287296	0.712704
Olfr618	10090.ENSMUSP00000095799	OL	mus	OL	receptor	0	0	0	0	1.33333	0.33174	0.287296	0.712704
Olfr658	10090.ENSMUSP00000086711	OL	mus	OL	receptor	270	1	2711963	0.9938	2.3	0.43469	0.286626	0.713374
Olfr503	10090.ENSMUSP00000077296	OL	mus	OL	receptor	0	0	0	0	2.3	0.43469	0.286626	0.713374
Olfr658	10090.ENSMUSP00000086711	OL	mus	OL	receptor	270	1	2711963	0.9938	2.3	0.43469	0.286626	0.713374
Olfr659	10090.ENSMUSP00000095772	OL	mus	OL	receptor	0	0	0	0	2.3	0.43469	0.286626	0.713374
Olfr1012	10090.ENSMUSP00000097500	OL	mus	OL	receptor	0	0	0	0	2	0.40425	0.285848	0.714152
Olfr1013	10090.ENSMUSP00000068173	OL	mus	OL	receptor	0	0	0	0	2	0.40425	0.285848	0.714152
Olfr1014	10090.ENSMUSP00000075600	OL	mus	OL	receptor	0	0	0	0	2	0.40425	0.285848	0.714152
Olfr1016	10090.ENSMUSP00000097499	OL	mus	OL	receptor	0	0	0	0	2	0.40425	0.285848	0.714152
Olfr679	10090.ENSMUSP00000095761	OL	mus	OL	receptor	0	0	0	0	2.31579	0.43497	0.285831	0.714169
Olfr681	10090.ENSMUSP00000095760	OL	mus	OL	receptor	0	0	0	0	2.31579	0.43497	0.285831	0.714169
Olfr790	10090.ENSMUSP00000052235	OL	mus	OL	receptor	0	0	0	0	1.93333	0.3968	0.285377	0.714623
Olfr822	10090.ENSMUSP00000079316	OL	mus	OL	receptor	0	0	0	0	1.93333	0.3968	0.285377	0.714623
Olfr569	10090.ENSMUSP00000077321	OL	mus	OL	receptor	270	1	2711963	0.9938	1.76923	0.37882	0.284801	0.715199
Olfr582	10090.ENSMUSP00000095813	OL	mus	OL	receptor	0	0	0	0	1.76923	0.37882	0.284801	0.715199
Olfr584	10090.ENSMUSP00000095811	OL	mus	OL	receptor	270	1	2711963	0.9938	1.76923	0.37882	0.284801	0.715199
Olfr606	10090.ENSMUSP00000095802	OL	mus	OL	receptor	0	0	0	0	1.5	0.34844	0.2845	0.7155
Olfr630	10090.ENSMUSP00000049569	OL	mus	OL	receptor	0	0	0	0	1.5	0.34844	0.2845	0.7155
Olfr556	10090.ENSMUSP00000095822	OL	mus	OL	receptor	270	1	2711963	0.9938	1.58333	0.35714	0.283826	0.716174
Olfr137	10090.ENSMUSP00000051537	OL	mus	OL	receptor	270	1	2711963	0.9938	1.8	0.37941	0.282796	0.717204
Olfr725	10090.ENSMUSP00000087282	OL	mus	OL	receptor	0	0	0	0	1.93333	0.39218	0.282054	0.717946
Olfr726	10090.ENSMUSP00000072207	OL	mus	OL	receptor	0	0	0	0	1.93333	0.39218	0.282054	0.717946
Olfr727	10090.ENSMUSP00000078145	OL	mus	OL	receptor	270	1	2711963	0.9938	1.93333	0.39218	0.282054	0.717946
Olfr1357	10090.ENSMUSP00000093127	OL	mus	OL	receptor	270	1	2711963	0.9938	1.25	0.31421	0.281038	0.718962
Olfr600	10090.ENSMUSP00000053887	OL	mus	OL	receptor	0	0	0	0	1.25	0.31421	0.281038	0.718962
Olfr672	10090.ENSMUSP00000054607	OL	mus	OL	receptor	0	0	0	0	1.25	0.31421	0.281038	0.718962
Olfr651	10090.ENSMUSP00000095778	OL	mus	OL	receptor	0	0	0	0	2.4	0.43527	0.280966	0.719034
Olfr648	10090.ENSMUSP00000062529	OL	mus	OL	receptor	270	1	2711963	0.9938	2.4	0.43527	0.280966	0.719034
Olfr651	10090.ENSMUSP00000095778	OL	mus	OL	receptor	0	0	0	0	2.4	0.43527	0.280966	0.719034
Olfr652	10090.ENSMUSP00000095777	OL	mus	OL	receptor	0	0	0	0	2.4	0.43527	0.280966	0.719034
Olfr527	10090.ENSMUSP00000072405	OL	mus	OL	receptor	0	0	0	0	1.76923	0.373	0.280425	0.719575
Olfr309	10090.ENSMUSP00000061929	OL	mus	OL	receptor	0	0	0	0	1.76923	0.373	0.280425	0.719575
Olfr527	10090.ENSMUSP00000072405	OL	mus	OL	receptor	0	0	0	0	1.76923	0.373	0.280425	0.719575
Olfr531	10090.ENSMUSP00000079048	OL	mus	OL	receptor	0	0	0	0	1.76923	0.373	0.280425	0.719575
Olfr156	10090.ENSMUSP00000078431	OL	mus	OL	receptor	0	0	0	0	2.36842	0.43125	0.28022	0.71978
Olfr157	10090.ENSMUSP00000078226	OL	mus	OL	receptor	0	0	0	0	2.36842	0.43125	0.28022	0.71978
Olfr159	10090.ENSMUSP00000060784	OL	mus	OL	receptor	0	0	0	0	2.36842	0.43125	0.28022	0.71978
Olfr1198	10090.ENSMUSP00000097402	OL	mus	OL	receptor	0	0	0	0	1.5	0.34303	0.280083	0.719917
Olfr1208	10090.ENSMUSP00000097398	OL	mus	OL	receptor	0	0	0	0	1.5	0.34303	0.280083	0.719917
Olfr1377	10090.ENSMUSP00000074672	OL	mus	OL	receptor	0	0	0	0	1.5	0.34303	0.280083	0.719917
Olfr51	10090.ENSMUSP00000075832	OL	mus	OL	receptor	0	0	0	0	1.5	0.34303	0.280083	0.719917
Olfr592	10090.ENSMUSP00000095808	OL	mus	OL	receptor	0	0	0	0	1.85714	0.37988	0.278756	0.721244
Olfr1342	10090.ENSMUSP00000053925	OL	mus	OL	receptor	0	0	0	0	1	0.27798	0.27798	0.72202
Olfr1441	10090.ENSMUSP00000061963	OL	mus	OL	receptor	0	0	0	0	1	0.27798	0.27798	0.72202
Olfr1509	10090.ENSMUSP00000046688	OL	mus	OL	receptor	0	0	0	0	1	0.27798	0.27798	0.72202
Olfr1342	10090.ENSMUSP00000053925	OL	mus	OL	receptor	0	0	0	0	1	0.27798	0.27798	0.72202
Olfr633	10090.ENSMUSP00000095790	OL	mus	OL	receptor	0	0	0	0	1	0.27798	0.27798	0.72202
Olfr655	10090.ENSMUSP00000054108	OL	mus	OL	receptor	0	0	0	0	1	0.27798	0.27798	0.72202
Olfr656	10090.ENSMUSP00000095774	OL	mus	OL	receptor	0	0	0	0	1	0.27798	0.27798	0.72202
Olfr736	10090.ENSMUSP00000062700	OL	mus	OL	receptor	0	0	0	0	1	0.27798	0.27798	0.72202
Olfr877	10090.ENSMUSP00000083230	OL	mus	OL	receptor	0	0	0	0	1	0.27798	0.27798	0.72202
Olfr671	10090.ENSMUSP00000077774	OL	mus	OL	receptor	270	1	2711963	0.9938	1.92308	0.3843	0.277122	0.722878
Olfr675	10090.ENSMUSP00000072847	OL	mus	OL	receptor	270	1	2711963	0.9938	1.92308	0.3843	0.277122	0.722878
Olfr1018	10090.ENSMUSP00000050833	OL	mus	OL	receptor	0	0	0	0	1.14286	0.29572	0.27662	0.72338
Olfr283	10090.ENSMUSP00000051239	OL	mus	OL	receptor	0	0	0	0	1.14286	0.29572	0.27662	0.72338
Olfr765	10090.ENSMUSP00000071490	OL	mus	OL	receptor	270	1	2711963	0.9938	2.44444	0.43217	0.276417	0.723583
Olfr767	10090.ENSMUSP00000080775	OL	mus	OL	receptor	270	1	2711963	0.9938	2.44444	0.43217	0.276417	0.723583
Olfr270	10090.ENSMUSP00000092699	OL	mus	OL	receptor	0	0	0	0	1.5	0.33762	0.275666	0.724334
Olfr145	10090.ENSMUSP00000083229	OL	mus	OL	receptor	270	1	2711963	0.9938	2.29412	0.41746	0.275618	0.724382
Olfr874	10090.ENSMUSP00000076009	OL	mus	OL	receptor	270	1	2711963	0.9938	2.29412	0.41746	0.275618	0.724382
Olfr875	10090.ENSMUSP00000079467	OL	mus	OL	receptor	0	0	0	0	2.29412	0.41746	0.275618	0.724382
Olfr876	10090.ENSMUSP00000083231	OL	mus	OL	receptor	0	0	0	0	2.29412	0.41746	0.275618	0.724382
Olfr1289	10090.ENSMUSP00000077188	OL	mus	OL	receptor	270	1	2711963	0.9938	1.63636	0.35125	0.274585	0.725415
Olfr1289	10090.ENSMUSP00000077188	OL	mus	OL	receptor	270	1	2711963	0.9938	1.63636	0.35125	0.274585	0.725415
Olfr620	10090.ENSMUSP00000061764	OL	mus	OL	receptor	0	0	0	0	2.61905	0.44423	0.274496	0.725504
Olfr624	10090.ENSMUSP00000049938	OL	mus	OL	receptor	270	1	2711963	0.9938	2.61905	0.44423	0.274496	0.725504
Olfr366	10090.ENSMUSP00000088524	OL	mus	OL	receptor	0	0	0	0	1.54545	0.34081	0.274148	0.725852
Olfr366	10090.ENSMUSP00000088524	OL	mus	OL	receptor	0	0	0	0	1.54545	0.34081	0.274148	0.725852
Olfr616	10090.ENSMUSP00000056570	OL	mus	OL	receptor	0	0	0	0	1.25	0.30609	0.273775	0.726225
Olfr401	10090.ENSMUSP00000078756	OL	mus	OL	receptor	0	0	0	0	2.8	0.45783	0.273606	0.726394
Olfr402	10090.ENSMUSP00000073356	OL	mus	OL	receptor	270	1	2711963	0.9938	2.8	0.45783	0.273606	0.726394
Olfr410	10090.ENSMUSP00000079235	OL	mus	OL	receptor	270	1	2711963	0.9938	2.8	0.45783	0.273606	0.726394
Olfr411	10090.ENSMUSP00000050456	OL	mus	OL	receptor	0	0	0	0	2.8	0.45783	0.273606	0.726394
Olfr412	10090.ENSMUSP00000076967	OL	mus	OL	receptor	270	1	2711963	0.9938	1.6	0.34442	0.272288	0.727712
Olfr290	10090.ENSMUSP00000073172	OL	mus	OL	receptor	0	0	0	0	2.17647	0.4003	0.271337	0.728663
Olfr291	10090.ENSMUSP00000077303	OL	mus	OL	receptor	0	0	0	0	2.17647	0.4003	0.271337	0.728663
Olfr707	10090.ENSMUSP00000086062	OL	mus	OL	receptor	270	1	2711963	0.9938	2.17647	0.4003	0.271337	0.728663
Olfr716	10090.ENSMUSP00000095740	OL	mus	OL	receptor	270	1	2711963	0.9938	2.17647	0.4003	0.271337	0.728663
Olfr707	10090.ENSMUSP00000086062	OL	mus	OL	receptor	270	1	2711963	0.9938	2.17647	0.4003	0.271337	0.728663
Olfr1188	10090.ENSMUSP00000088202	OL	mus	OL	receptor	0	0	0	0	1.44444	0.32551	0.270841	0.729159
Olfr1233	10090.ENSMUSP00000097372	OL	mus	OL	receptor	0	0	0	0	1.44444	0.32551	0.270841	0.729159
Olfr1188	10090.ENSMUSP00000088202	OL	mus	OL	receptor	0	0	0	0	1.44444	0.32551	0.270841	0.729159
Olfr355	10090.ENSMUSP00000097725	OL	mus	OL	receptor	270	1	2711963	0.9938	2.6	0.43643	0.270662	0.729338
Olfr365	10090.ENSMUSP00000073801	OL	mus	OL	receptor	270	1	2711963	0.9938	2.6	0.43643	0.270662	0.729338
Olfr1002	10090.ENSMUSP00000097504	OL	mus	OL	receptor	0	0	0	0	1.83333	0.36463	0.269297	0.730703
Olfr1009	10090.ENSMUSP00000061475	OL	mus	OL	receptor	0	0	0	0	1.83333	0.36463	0.269297	0.730703
Olfr154	10090.ENSMUSP00000097502	OL	mus	OL	receptor	0	0	0	0	1.83333	0.36463	0.269297	0.730703
Olfr1275	10090.ENSMUSP00000097215	OL	mus	OL	receptor	0	0	0	0	2	0.38029	0.268906	0.731094
Olfr1276	10090.ENSMUSP00000073046	OL	mus	OL	receptor	0	0	0	0	2	0.38029	0.268906	0.731094
Olfr1278	10090.ENSMUSP00000087802	OL	mus	OL	receptor	0	0	0	0	2	0.38029	0.268906	0.731094
Olfr1031	10090.ENSMUSP00000059256	OL	mus	OL	receptor	270	1	2711963	0.9938	1.76923	0.35716	0.268516	0.731484
Olfr38	10090.ENSMUSP00000093654	OL	mus	OL	receptor	0	0	0	0	2.29412	0.40463	0.267147	0.732853
Olfr450	10090.ENSMUSP00000068823	OL	mus	OL	receptor	0	0	0	0	2.29412	0.40463	0.267147	0.732853
Olfr452	10090.ENSMUSP00000074914	OL	mus	OL	receptor	0	0	0	0	2.29412	0.40463	0.267147	0.732853
Olfr453	10090.ENSMUSP00000052043	OL	mus	OL	receptor	270	1	2711963	0.9938	2.29412	0.40463	0.267147	0.732853
Olfr547	10090.ENSMUSP00000095831	OL	mus	OL	receptor	0	0	0	0	2.63158	0.43263	0.266691	0.733309
Olfr132	10090.ENSMUSP00000084368	OL	mus	OL	receptor	0	0	0	0	2.7	0.4376	0.266315	0.733685
Olfr90	10090.ENSMUSP00000065322	OL	mus	OL	receptor	270	1	2711963	0.9938	2.7	0.4376	0.266315	0.733685
Olfr93	10090.ENSMUSP00000053499	OL	mus	OL	receptor	0	0	0	0	2.7	0.4376	0.266315	0.733685
Olfr1193	10090.ENSMUSP00000080399	OL	mus	OL	receptor	270	1	2711963	0.9938	3.04167	0.46316	0.265568	0.734432
Olfr1270	10090.ENSMUSP00000097343	OL	mus	OL	receptor	270	1	2711963	0.9938	3.04167	0.46316	0.265568	0.734432
Olfr1271	10090.ENSMUSP00000097340	OL	mus	OL	receptor	0	0	0	0	3.04167	0.46316	0.265568	0.734432
Olfr1272	10090.ENSMUSP00000097339	OL	mus	OL	receptor	0	0	0	0	3.04167	0.46316	0.265568	0.734432
Olfr142	10090.ENSMUSP00000097341	OL	mus	OL	receptor	0	0	0	0	3.04167	0.46316	0.265568	0.734432
Olfr32	10090.ENSMUSP00000097344	OL	mus	OL	receptor	0	0	0	0	3.04167	0.46316	0.265568	0.734432
Olfr32	10090.ENSMUSP00000097344	OL	mus	OL	receptor	0	0	0	0	3.04167	0.46316	0.265568	0.734432
Olfr462	10090.ENSMUSP00000055334	OL	mus	OL	receptor	270	1	2711963	0.9938	2.7	0.43423	0.264264	0.735736
Olfr463	10090.ENSMUSP00000080146	OL	mus	OL	receptor	270	1	2711963	0.9938	2.7	0.43423	0.264264	0.735736
Olfr464	10090.ENSMUSP00000074415	OL	mus	OL	receptor	0	0	0	0	2.7	0.43423	0.264264	0.735736
Olfr514	10090.ENSMUSP00000081807	OL	mus	OL	receptor	0	0	0	0	2.47368	0.41471	0.263677	0.736323
Olfr512	10090.ENSMUSP00000074291	OL	mus	OL	receptor	0	0	0	0	2.47368	0.41471	0.263677	0.736323
Olfr514	10090.ENSMUSP00000081807	OL	mus	OL	receptor	0	0	0	0	2.47368	0.41471	0.263677	0.736323
Olfr516	10090.ENSMUSP00000071358	OL	mus	OL	receptor	270	1	2711963	0.9938	2.47368	0.41471	0.263677	0.736323
Olfr517	10090.ENSMUSP00000081805	OL	mus	OL	receptor	0	0	0	0	2.47368	0.41471	0.263677	0.736323
Olfr518	10090.ENSMUSP00000050503	OL	mus	OL	receptor	270	1	2711963	0.9938	2.47368	0.41471	0.263677	0.736323
Olfr519	10090.ENSMUSP00000081804	OL	mus	OL	receptor	0	0	0	0	2.47368	0.41471	0.263677	0.736323
Olfr781	10090.ENSMUSP00000075041	OL	mus	OL	receptor	0	0	0	0	1.83333	0.35677	0.263492	0.736508
Olfr799	10090.ENSMUSP00000071126	OL	mus	OL	receptor	0	0	0	0	1.83333	0.35677	0.263492	0.736508
Olfr1471	10090.ENSMUSP00000093917	OL	mus	OL	receptor	0	0	0	0	1.92308	0.36323	0.261929	0.738071
Olfr1496	10090.ENSMUSP00000054924	OL	mus	OL	receptor	270	1	2711963	0.9938	1.92308	0.36323	0.261929	0.738071
Olfr623	10090.ENSMUSP00000070658	OL	mus	OL	receptor	0	0	0	0	2.73684	0.43289	0.261669	0.738331
Olfr623	10090.ENSMUSP00000070658	OL	mus	OL	receptor	0	0	0	0	2.73684	0.43289	0.261669	0.738331
Olfr64	10090.ENSMUSP00000080444	OL	mus	OL	receptor	270	1	2711963	0.9938	2.73684	0.43289	0.261669	0.738331
Olfr65	10090.ENSMUSP00000058834	OL	mus	OL	receptor	270	1	2711963	0.9938	2.73684	0.43289	0.261669	0.738331
Olfr66	10090.ENSMUSP00000078119	OL	mus	OL	receptor	270	1	2711963	0.9938	2.73684	0.43289	0.261669	0.738331
Olfr780	10090.ENSMUSP00000054927	OL	mus	OL	receptor	0	0	0	0	2.07692	0.37445	0.259827	0.740173
Olfr657	10090.ENSMUSP00000095773	OL	mus	OL	receptor	270	1	2711963	0.9938	1.83333	0.35117	0.259356	0.740644
Olfr504	10090.ENSMUSP00000075025	OL	mus	OL	receptor	0	0	0	0	1.83333	0.35117	0.259356	0.740644
Olfr657	10090.ENSMUSP00000095773	OL	mus	OL	receptor	270	1	2711963	0.9938	1.83333	0.35117	0.259356	0.740644
Olfr1414	10090.ENSMUSP00000054752	OL	mus	OL	receptor	270	1	2711963	0.9938	1.81818	0.34911	0.258907	0.741093
Olfr1415	10090.ENSMUSP00000084047	OL	mus	OL	receptor	0	0	0	0	1.81818	0.34911	0.258907	0.741093
Olfr1416	10090.ENSMUSP00000084048	OL	mus	OL	receptor	0	0	0	0	1.81818	0.34911	0.258907	0.741093
B3gnt2	10090.ENSMUSP00000060247	OL	mus	OL	receptor	0	0	0	0	11.1842	0.86453	0.25851	0.74149
Olfr1347	10090.ENSMUSP00000046590	OL	mus	OL	receptor	0	0	0	0	1.5	0.31382	0.256233	0.743767
Olfr1348	10090.ENSMUSP00000083498	OL	mus	OL	receptor	0	0	0	0	1.5	0.31382	0.256233	0.743767
Olfr303	10090.ENSMUSP00000062459	OL	mus	OL	receptor	0	0	0	0	1.5	0.31382	0.256233	0.743767
Olfr1107	10090.ENSMUSP00000097450	OL	mus	OL	receptor	0	0	0	0	1.92308	0.35463	0.255727	0.744273
Olfr1109	10090.ENSMUSP00000097449	OL	mus	OL	receptor	0	0	0	0	1.92308	0.35463	0.255727	0.744273
Olfr1110	10090.ENSMUSP00000097447	OL	mus	OL	receptor	0	0	0	0	1.92308	0.35463	0.255727	0.744273
Olfr259	10090.ENSMUSP00000097448	OL	mus	OL	receptor	0	0	0	0	1.92308	0.35463	0.255727	0.744273
Olfr1317	10090.ENSMUSP00000058587	OL	mus	OL	receptor	0	0	0	0	1.91667	0.35383	0.255577	0.744423
Olfr1318	10090.ENSMUSP00000051938	OL	mus	OL	receptor	0	0	0	0	1.91667	0.35383	0.255577	0.744423
Olfr459	10090.ENSMUSP00000061622	OL	mus	OL	receptor	0	0	0	0	2.07692	0.36804	0.255379	0.744621
Olfr460	10090.ENSMUSP00000054887	OL	mus	OL	receptor	0	0	0	0	2.07692	0.36804	0.255379	0.744621
Olfr461	10090.ENSMUSP00000086917	OL	mus	OL	receptor	0	0	0	0	2.07692	0.36804	0.255379	0.744621
Olfr1178	10090.ENSMUSP00000075066	OL	mus	OL	receptor	0	0	0	0	2.68421	0.41627	0.254078	0.745922
Olfr1179	10090.ENSMUSP00000097413	OL	mus	OL	receptor	0	0	0	0	2.68421	0.41627	0.254078	0.745922
Olfr1180	10090.ENSMUSP00000097412	OL	mus	OL	receptor	270	1	2711963	0.9938	2.68421	0.41627	0.254078	0.745922
Olfr1180	10090.ENSMUSP00000097412	OL	mus	OL	receptor	270	1	2711963	0.9938	2.68421	0.41627	0.254078	0.745922
Olfr986	10090.ENSMUSP00000056713	OL	mus	OL	receptor	270	1	2711963	0.9938	1.78571	0.33929	0.253902	0.746098
Olfr1234	10090.ENSMUSP00000097371	OL	mus	OL	receptor	270	1	2711963	0.9938	2.85	0.42719	0.253046	0.746954
Olfr1238	10090.ENSMUSP00000097369	OL	mus	OL	receptor	270	1	2711963	0.9938	2.85	0.42719	0.253046	0.746954
Olfr1239	10090.ENSMUSP00000097368	OL	mus	OL	receptor	0	0	0	0	2.85	0.42719	0.253046	0.746954
Olfr1240	10090.ENSMUSP00000097367	OL	mus	OL	receptor	270	1	2711963	0.9938	2.85	0.42719	0.253046	0.746954
Olfr1261	10090.ENSMUSP00000076959	OL	mus	OL	receptor	0	0	0	0	2.14286	0.369	0.252075	0.747925
Olfr1262	10090.ENSMUSP00000052387	OL	mus	OL	receptor	0	0	0	0	2.14286	0.369	0.252075	0.747925
Olfr1263	10090.ENSMUSP00000080494	OL	mus	OL	receptor	0	0	0	0	2.14286	0.369	0.252075	0.747925
Olfr995	10090.ENSMUSP00000097508	OL	mus	OL	receptor	270	1	2711963	0.9938	2.4	0.39022	0.251886	0.748114
Olfr987	10090.ENSMUSP00000097513	OL	mus	OL	receptor	0	0	0	0	2.4	0.39022	0.251886	0.748114
Olfr988	10090.ENSMUSP00000097512	OL	mus	OL	receptor	0	0	0	0	2.4	0.39022	0.251886	0.748114
Olfr992	10090.ENSMUSP00000097511	OL	mus	OL	receptor	2	0	1	0	2.4	0.39022	0.251886	0.748114
Olfr993	10090.ENSMUSP00000097510	OL	mus	OL	receptor	270	1	2711963	0.9938	2.4	0.39022	0.251886	0.748114
Olfr994	10090.ENSMUSP00000097509	OL	mus	OL	receptor	0	0	0	0	2.4	0.39022	0.251886	0.748114
Olfr995	10090.ENSMUSP00000097508	OL	mus	OL	receptor	270	1	2711963	0.9938	2.4	0.39022	0.251886	0.748114
Olfr1491	10090.ENSMUSP00000057902	OL	mus	OL	receptor	0	0	0	0	1.83333	0.3407	0.251624	0.748376
Olfr1494	10090.ENSMUSP00000056291	OL	mus	OL	receptor	270	1	2711963	0.9938	1.83333	0.3407	0.251624	0.748376
Olfr1495	10090.ENSMUSP00000057468	OL	mus	OL	receptor	0	0	0	0	1.83333	0.3407	0.251624	0.748376
Olfr131	10090.ENSMUSP00000061861	OL	mus	OL	receptor	0	0	0	0	1.16667	0.27117	0.251054	0.748946
Olfr282	10090.ENSMUSP00000075248	OL	mus	OL	receptor	0	0	0	0	1.16667	0.27117	0.251054	0.748946
Olfr384	10090.ENSMUSP00000072758	OL	mus	OL	receptor	0	0	0	0	1.16667	0.27117	0.251054	0.748946
Olfr385	10090.ENSMUSP00000071484	OL	mus	OL	receptor	0	0	0	0	1.16667	0.27117	0.251054	0.748946
Olfr870	10090.ENSMUSP00000091405	OL	mus	OL	receptor	0	0	0	0	1.16667	0.27117	0.251054	0.748946
Olfr871	10090.ENSMUSP00000072865	OL	mus	OL	receptor	0	0	0	0	1.16667	0.27117	0.251054	0.748946
Olfr1339	10090.ENSMUSP00000092428	OL	mus	OL	receptor	0	0	0	0	1.28571	0.28407	0.250527	0.749473
Olfr1340	10090.ENSMUSP00000092430	OL	mus	OL	receptor	0	0	0	0	1.28571	0.28407	0.250527	0.749473
Olfr62	10090.ENSMUSP00000099727	OL	mus	OL	receptor	0	0	0	0	1.28571	0.28407	0.250527	0.749473
Olfr731	10090.ENSMUSP00000050705	OL	mus	OL	receptor	0	0	0	0	1	0.24969	0.24969	0.75031
Olfr284	10090.ENSMUSP00000065626	OL	mus	OL	receptor	0	0	0	0	1	0.24969	0.24969	0.75031
Olfr398	10090.ENSMUSP00000059548	OL	mus	OL	receptor	0	0	0	0	1	0.24969	0.24969	0.75031
Olfr686	10090.ENSMUSP00000049601	OL	mus	OL	receptor	0	0	0	0	1	0.24969	0.24969	0.75031
Olfr690	10090.ENSMUSP00000061272	OL	mus	OL	receptor	0	0	0	0	1	0.24969	0.24969	0.75031
Olfr731	10090.ENSMUSP00000050705	OL	mus	OL	receptor	0	0	0	0	1	0.24969	0.24969	0.75031
Olfr1359	10090.ENSMUSP00000074361	OL	mus	OL	receptor	270	1	2711963	0.9938	2.88889	0.42061	0.247465	0.752535
Olfr1360	10090.ENSMUSP00000077010	OL	mus	OL	receptor	270	1	2711963	0.9938	2.88889	0.42061	0.247465	0.752535
Olfr1370	10090.ENSMUSP00000054533	OL	mus	OL	receptor	0	0	0	0	2.88889	0.42061	0.247465	0.752535
Olfr222	10090.ENSMUSP00000071835	OL	mus	OL	receptor	270	1	2711963	0.9938	2.88889	0.42061	0.247465	0.752535
Olfr222	10090.ENSMUSP00000071835	OL	mus	OL	receptor	270	1	2711963	0.9938	2.88889	0.42061	0.247465	0.752535
Olfr403	10090.ENSMUSP00000075971	OL	mus	OL	receptor	270	1	2711963	0.9938	2.52941	0.39286	0.247018	0.752982
Olfr43	10090.ENSMUSP00000077966	OL	mus	OL	receptor	270	1	2711963	0.9938	2.52941	0.39286	0.247018	0.752982
Olfr520	10090.ENSMUSP00000095864	OL	mus	OL	receptor	0	0	0	0	2	0.34699	0.245359	0.754641
Olfr521	10090.ENSMUSP00000095863	OL	mus	OL	receptor	0	0	0	0	2	0.34699	0.245359	0.754641
Olfr601	10090.ENSMUSP00000079328	OL	mus	OL	receptor	0	0	0	0	1.42857	0.29271	0.244899	0.755101
Olfr605	10090.ENSMUSP00000079489	OL	mus	OL	receptor	0	0	0	0	1.42857	0.29271	0.244899	0.755101
Olfr974	10090.ENSMUSP00000062985	OL	mus	OL	receptor	0	0	0	0	1.42857	0.29271	0.244899	0.755101
Olfr1	10090.ENSMUSP00000090601	OL	mus	OL	receptor	0	0	0	0	3.09524	0.42959	0.244178	0.755822
Olfr20	10090.ENSMUSP00000074011	OL	mus	OL	receptor	0	0	0	0	3.09524	0.42959	0.244178	0.755822
Olfr23	10090.ENSMUSP00000090596	OL	mus	OL	receptor	0	0	0	0	3.09524	0.42959	0.244178	0.755822
Olfr376	10090.ENSMUSP00000077977	OL	mus	OL	receptor	0	0	0	0	3.09524	0.42959	0.244178	0.755822
Olfr378	10090.ENSMUSP00000066971	OL	mus	OL	receptor	0	0	0	0	3.09524	0.42959	0.244178	0.755822
Olfr390	10090.ENSMUSP00000090598	OL	mus	OL	receptor	0	0	0	0	3.09524	0.42959	0.244178	0.755822
Olfr397	10090.ENSMUSP00000090595	OL	mus	OL	receptor	0	0	0	0	3.09524	0.42959	0.244178	0.755822
Olfr1320	10090.ENSMUSP00000094186	OL	mus	OL	receptor	0	0	0	0	1.8	0.32675	0.243545	0.756455
Olfr266	10090.ENSMUSP00000054070	OL	mus	OL	receptor	0	0	0	0	1.8	0.32675	0.243545	0.756455
Olfr738	10090.ENSMUSP00000059540	OL	mus	OL	receptor	0	0	0	0	2.76471	0.40071	0.240994	0.759006
Olfr739	10090.ENSMUSP00000074740	OL	mus	OL	receptor	0	0	0	0	2.76471	0.40071	0.240994	0.759006
Olfr740	10090.ENSMUSP00000087276	OL	mus	OL	receptor	0	0	0	0	2.76471	0.40071	0.240994	0.759006
Olfr741	10090.ENSMUSP00000071824	OL	mus	OL	receptor	0	0	0	0	2.76471	0.40071	0.240994	0.759006
Olfr742	10090.ENSMUSP00000087273	OL	mus	OL	receptor	0	0	0	0	2.76471	0.40071	0.240994	0.759006
Olfr744	10090.ENSMUSP00000066496	OL	mus	OL	receptor	0	0	0	0	2.76471	0.40071	0.240994	0.759006
Olfr1189	10090.ENSMUSP00000088201	OL	mus	OL	receptor	270	1	2711963	0.9938	2.09091	0.34847	0.240989	0.759011
Olfr1230	10090.ENSMUSP00000097375	OL	mus	OL	receptor	270	1	2711963	0.9938	2.09091	0.34847	0.240989	0.759011
Olfr693	10090.ENSMUSP00000059679	OL	mus	OL	receptor	0	0	0	0	2.84211	0.40521	0.240359	0.759641
Olfr694	10090.ENSMUSP00000080740	OL	mus	OL	receptor	0	0	0	0	2.84211	0.40521	0.240359	0.759641
Olfr695	10090.ENSMUSP00000079726	OL	mus	OL	receptor	0	0	0	0	2.84211	0.40521	0.240359	0.759641
Olfr697	10090.ENSMUSP00000055207	OL	mus	OL	receptor	0	0	0	0	2.84211	0.40521	0.240359	0.759641
Olfr698	10090.ENSMUSP00000074509	OL	mus	OL	receptor	0	0	0	0	2.84211	0.40521	0.240359	0.759641
Olfr699	10090.ENSMUSP00000068023	OL	mus	OL	receptor	0	0	0	0	2.84211	0.40521	0.240359	0.759641
Olfr700	10090.ENSMUSP00000078855	OL	mus	OL	receptor	0	0	0	0	2.84211	0.40521	0.240359	0.759641
Olfr701	10090.ENSMUSP00000064987	OL	mus	OL	receptor	270	1	2711963	0.9938	2.84211	0.40521	0.240359	0.759641
Olfr703	10090.ENSMUSP00000095746	OL	mus	OL	receptor	0	0	0	0	2.84211	0.40521	0.240359	0.759641
Olfr704	10090.ENSMUSP00000095745	OL	mus	OL	receptor	0	0	0	0	2.84211	0.40521	0.240359	0.759641
Olfr705	10090.ENSMUSP00000050694	OL	mus	OL	receptor	270	1	2711963	0.9938	2.84211	0.40521	0.240359	0.759641
Olfr706	10090.ENSMUSP00000057180	OL	mus	OL	receptor	270	1	2711963	0.9938	2.84211	0.40521	0.240359	0.759641
Olfr960	10090.ENSMUSP00000076315	OL	mus	OL	receptor	0	0	0	0	2.07692	0.34389	0.238622	0.761378
Olfr961	10090.ENSMUSP00000075863	OL	mus	OL	receptor	0	0	0	0	2.07692	0.34389	0.238622	0.761378
Olfr963	10090.ENSMUSP00000073139	OL	mus	OL	receptor	0	0	0	0	2.07692	0.34389	0.238622	0.761378
Olfr589	10090.ENSMUSP00000060166	OL	mus	OL	receptor	270	1	2711963	0.9938	2.09091	0.34448	0.23823	0.76177
Olfr594	10090.ENSMUSP00000095806	OL	mus	OL	receptor	270	1	2711963	0.9938	2.09091	0.34448	0.23823	0.76177
Olfr691	10090.ENSMUSP00000061078	OL	mus	OL	receptor	0	0	0	0	1.42857	0.28459	0.238105	0.761895
Olfr1356	10090.ENSMUSP00000054345	OL	mus	OL	receptor	0	0	0	0	2.70588	0.38843	0.236134	0.763866
Olfr371	10090.ENSMUSP00000077921	OL	mus	OL	receptor	270	1	2711963	0.9938	2.70588	0.38843	0.236134	0.763866
Olfr1423	10090.ENSMUSP00000085134	OL	mus	OL	receptor	270	1	2711963	0.9938	3.52632	0.44326	0.236047	0.763953
Olfr1424	10090.ENSMUSP00000085132	OL	mus	OL	receptor	0	0	0	0	3.52632	0.44326	0.236047	0.763953
Olfr1425	10090.ENSMUSP00000085130	OL	mus	OL	receptor	270	1	2711963	0.9938	3.52632	0.44326	0.236047	0.763953
Olfr1426	10090.ENSMUSP00000060659	OL	mus	OL	receptor	270	1	2711963	0.9938	3.52632	0.44326	0.236047	0.763953
Olfr1427	10090.ENSMUSP00000085127	OL	mus	OL	receptor	0	0	0	0	3.52632	0.44326	0.236047	0.763953
Olfr1306	10090.ENSMUSP00000097202	OL	mus	OL	receptor	0	0	0	0	2.76471	0.39146	0.23543	0.76457
Olfr1307	10090.ENSMUSP00000097201	OL	mus	OL	receptor	0	0	0	0	2.76471	0.39146	0.23543	0.76457
Olfr1308	10090.ENSMUSP00000097200	OL	mus	OL	receptor	0	0	0	0	2.76471	0.39146	0.23543	0.76457
Olfr1312	10090.ENSMUSP00000097195	OL	mus	OL	receptor	0	0	0	0	2.76471	0.39146	0.23543	0.76457
Olfr1313	10090.ENSMUSP00000097194	OL	mus	OL	receptor	0	0	0	0	2.76471	0.39146	0.23543	0.76457
Olfr1314	10090.ENSMUSP00000097193	OL	mus	OL	receptor	0	0	0	0	2.76471	0.39146	0.23543	0.76457
Olfr1316	10090.ENSMUSP00000097191	OL	mus	OL	receptor	0	0	0	0	2.76471	0.39146	0.23543	0.76457
Olfr1431	10090.ENSMUSP00000072158	OL	mus	OL	receptor	0	0	0	0	3.11111	0.41493	0.235243	0.764757
Olfr1433	10090.ENSMUSP00000085115	OL	mus	OL	receptor	270	1	2711963	0.9938	3.11111	0.41493	0.235243	0.764757
Olfr1436	10090.ENSMUSP00000085113	OL	mus	OL	receptor	0	0	0	0	3.11111	0.41493	0.235243	0.764757
Olfr1437	10090.ENSMUSP00000056003	OL	mus	OL	receptor	0	0	0	0	3.11111	0.41493	0.235243	0.764757
Olfr1440	10090.ENSMUSP00000054798	OL	mus	OL	receptor	0	0	0	0	3.11111	0.41493	0.235243	0.764757
Olfr262	10090.ENSMUSP00000085120	OL	mus	OL	receptor	270	1	2711963	0.9938	3.11111	0.41493	0.235243	0.764757
Olfr110	10090.ENSMUSP00000055006	OL	mus	OL	receptor	0	0	0	0	2.94118	0.40283	0.234888	0.765112
Olfr111	10090.ENSMUSP00000094933	OL	mus	OL	receptor	0	0	0	0	2.94118	0.40283	0.234888	0.765112
Olfr1113	10090.ENSMUSP00000078883	OL	mus	OL	receptor	0	0	0	0	2.94118	0.40283	0.234888	0.765112
Olfr1115	10090.ENSMUSP00000080647	OL	mus	OL	receptor	0	0	0	0	2.94118	0.40283	0.234888	0.765112
Olfr1124	10090.ENSMUSP00000062513	OL	mus	OL	receptor	0	0	0	0	2.94118	0.40283	0.234888	0.765112
Olfr1402	10090.ENSMUSP00000057416	OL	mus	OL	receptor	0	0	0	0	2.94118	0.40283	0.234888	0.765112
Olfr1402	10090.ENSMUSP00000057416	OL	mus	OL	receptor	0	0	0	0	2.94118	0.40283	0.234888	0.765112
Olfr1022	10090.ENSMUSP00000059312	OL	mus	OL	receptor	0	0	0	0	1.57143	0.29381	0.234379	0.765621
Olfr1023	10090.ENSMUSP00000059849	OL	mus	OL	receptor	0	0	0	0	1.57143	0.29381	0.234379	0.765621
Olfr224	10090.ENSMUSP00000079881	OL	mus	OL	receptor	270	1	2711963	0.9938	3	0.40375	0.233105	0.766895
Olfr325	10090.ENSMUSP00000076168	OL	mus	OL	receptor	270	1	2711963	0.9938	3	0.40375	0.233105	0.766895
Olfr328	10090.ENSMUSP00000073588	OL	mus	OL	receptor	270	1	2711963	0.9938	3	0.40375	0.233105	0.766895
Olfr330	10090.ENSMUSP00000063194	OL	mus	OL	receptor	270	1	2711963	0.9938	3	0.40375	0.233105	0.766895
Olfr331	10090.ENSMUSP00000080440	OL	mus	OL	receptor	270	1	2711963	0.9938	3	0.40375	0.233105	0.766895
Olfr1256	10090.ENSMUSP00000097351	OL	mus	OL	receptor	270	1	2711963	0.9938	2.53333	0.37077	0.232948	0.767052
Fzd2	10090.ENSMUSP00000091463	OL	mus	OL	receptor	42	0.4634	332857	0.5292	13.7353	0.86303	0.232866	0.767134
Olfr1055	10090.ENSMUSP00000097479	OL	mus	OL	receptor	0	0	0	0	1.33333	0.26884	0.232823	0.767177
Olfr1056	10090.ENSMUSP00000097478	OL	mus	OL	receptor	0	0	0	0	1.33333	0.26884	0.232823	0.767177
Olfr599	10090.ENSMUSP00000095803	OL	mus	OL	receptor	0	0	0	0	1.33333	0.26884	0.232823	0.767177
Olfr96	10090.ENSMUSP00000077338	OL	mus	OL	receptor	0	0	0	0	1.33333	0.26884	0.232823	0.767177
Olfr1111	10090.ENSMUSP00000097446	OL	mus	OL	receptor	270	1	2711963	0.9938	1.5	0.28147	0.229819	0.770181
Olfr1111	10090.ENSMUSP00000097446	OL	mus	OL	receptor	270	1	2711963	0.9938	1.5	0.28147	0.229819	0.770181
Olfr1450	10090.ENSMUSP00000080666	OL	mus	OL	receptor	0	0	0	0	1.57143	0.28643	0.228492	0.771508
Olfr1449	10090.ENSMUSP00000056181	OL	mus	OL	receptor	0	0	0	0	1.57143	0.28643	0.228492	0.771508
Olfr1450	10090.ENSMUSP00000080666	OL	mus	OL	receptor	0	0	0	0	1.57143	0.28643	0.228492	0.771508
Olfr611	10090.ENSMUSP00000077246	OL	mus	OL	receptor	0	0	0	0	1.57143	0.28643	0.228492	0.771508
Olfr612	10090.ENSMUSP00000081869	OL	mus	OL	receptor	0	0	0	0	1.57143	0.28643	0.228492	0.771508
Olfr611	10090.ENSMUSP00000077246	OL	mus	OL	receptor	0	0	0	0	1.57143	0.28643	0.228492	0.771508
Olfr812	10090.ENSMUSP00000053359	OL	mus	OL	receptor	0	0	0	0	3.16667	0.40434	0.227219	0.772781
Olfr779	10090.ENSMUSP00000089616	OL	mus	OL	receptor	0	0	0	0	3.16667	0.40434	0.227219	0.772781
Olfr782	10090.ENSMUSP00000076282	OL	mus	OL	receptor	0	0	0	0	3.16667	0.40434	0.227219	0.772781
Olfr784	10090.ENSMUSP00000080953	OL	mus	OL	receptor	0	0	0	0	3.16667	0.40434	0.227219	0.772781
Olfr805	10090.ENSMUSP00000092874	OL	mus	OL	receptor	0	0	0	0	3.16667	0.40434	0.227219	0.772781
Olfr806	10090.ENSMUSP00000092873	OL	mus	OL	receptor	0	0	0	0	3.16667	0.40434	0.227219	0.772781
Olfr812	10090.ENSMUSP00000053359	OL	mus	OL	receptor	0	0	0	0	3.16667	0.40434	0.227219	0.772781
Olfr687	10090.ENSMUSP00000095758	OL	mus	OL	receptor	270	1	2711963	0.9938	2.46154	0.35608	0.226957	0.773043
Olfr688	10090.ENSMUSP00000095757	OL	mus	OL	receptor	270	1	2711963	0.9938	2.46154	0.35608	0.226957	0.773043
Olfr689	10090.ENSMUSP00000095756	OL	mus	OL	receptor	270	1	2711963	0.9938	2.46154	0.35608	0.226957	0.773043
Olfr687	10090.ENSMUSP00000095758	OL	mus	OL	receptor	270	1	2711963	0.9938	2.46154	0.35608	0.226957	0.773043
Olfr572	10090.ENSMUSP00000095816	OL	mus	OL	receptor	0	0	0	0	1.42857	0.2712	0.226902	0.773098
Olfr467	10090.ENSMUSP00000081811	OL	mus	OL	receptor	0	0	0	0	3.10526	0.39891	0.226374	0.773626
Olfr471	10090.ENSMUSP00000081813	OL	mus	OL	receptor	0	0	0	0	3.10526	0.39891	0.226374	0.773626
Olfr472	10090.ENSMUSP00000081815	OL	mus	OL	receptor	0	0	0	0	3.10526	0.39891	0.226374	0.773626
Olfr473	10090.ENSMUSP00000081816	OL	mus	OL	receptor	0	0	0	0	3.10526	0.39891	0.226374	0.773626
Olfr474	10090.ENSMUSP00000055931	OL	mus	OL	receptor	0	0	0	0	3.10526	0.39891	0.226374	0.773626
Olfr476	10090.ENSMUSP00000076485	OL	mus	OL	receptor	0	0	0	0	3.10526	0.39891	0.226374	0.773626
Olfr477	10090.ENSMUSP00000091654	OL	mus	OL	receptor	0	0	0	0	3.10526	0.39891	0.226374	0.773626
Olfr480	10090.ENSMUSP00000071583	OL	mus	OL	receptor	270	1	2711963	0.9938	3.10526	0.39891	0.226374	0.773626
Olfr491	10090.ENSMUSP00000061188	OL	mus	OL	receptor	270	1	2711963	0.9938	3.10526	0.39891	0.226374	0.773626
Olfr508	10090.ENSMUSP00000072686	OL	mus	OL	receptor	270	1	2711963	0.9938	3.10526	0.39891	0.226374	0.773626
Olfr1394	10090.ENSMUSP00000063062	OL	mus	OL	receptor	0	0	0	0	3.13333	0.39917	0.225504	0.774496
Olfr164	10090.ENSMUSP00000056970	OL	mus	OL	receptor	270	1	2711963	0.9938	3.13333	0.39917	0.225504	0.774496
Olfr165	10090.ENSMUSP00000062079	OL	mus	OL	receptor	0	0	0	0	3.13333	0.39917	0.225504	0.774496
Olfr172	10090.ENSMUSP00000093690	OL	mus	OL	receptor	270	1	2711963	0.9938	3.29412	0.40478	0.223023	0.776977
Olfr173	10090.ENSMUSP00000052798	OL	mus	OL	receptor	270	1	2711963	0.9938	3.29412	0.40478	0.223023	0.776977
Olfr195	10090.ENSMUSP00000073737	OL	mus	OL	receptor	0	0	0	0	3.29412	0.40478	0.223023	0.776977
Olfr195	10090.ENSMUSP00000073737	OL	mus	OL	receptor	0	0	0	0	3.29412	0.40478	0.223023	0.776977
Olfr978	10090.ENSMUSP00000060106	OL	mus	OL	receptor	270	1	2711963	0.9938	2.84615	0.37586	0.222791	0.777209
Olfr978	10090.ENSMUSP00000060106	OL	mus	OL	receptor	270	1	2711963	0.9938	2.84615	0.37586	0.222791	0.777209
Olfr979	10090.ENSMUSP00000079648	OL	mus	OL	receptor	270	1	2711963	0.9938	2.84615	0.37586	0.222791	0.777209
Olfr980	10090.ENSMUSP00000091386	OL	mus	OL	receptor	0	0	0	0	2.84615	0.37586	0.222791	0.777209
Olfr1202	10090.ENSMUSP00000071935	OL	mus	OL	receptor	0	0	0	0	3	0.3856	0.222626	0.777374
Olfr1204	10090.ENSMUSP00000077701	OL	mus	OL	receptor	0	0	0	0	3	0.3856	0.222626	0.777374
Olfr1257	10090.ENSMUSP00000056439	OL	mus	OL	receptor	0	0	0	0	3	0.3856	0.222626	0.777374
Olfr1258	10090.ENSMUSP00000099669	OL	mus	OL	receptor	0	0	0	0	3	0.3856	0.222626	0.777374
Olfr257	10090.ENSMUSP00000078672	OL	mus	OL	receptor	0	0	0	0	3	0.38451	0.221997	0.778003
Olfr281	10090.ENSMUSP00000060754	OL	mus	OL	receptor	0	0	0	0	3	0.38451	0.221997	0.778003
Olfr1349	10090.ENSMUSP00000056639	OL	mus	OL	receptor	270	1	2711963	0.9938	1.2	0.24213	0.221033	0.778967
Olfr1368	10090.ENSMUSP00000050942	OL	mus	OL	receptor	0	0	0	0	1.2	0.24213	0.221033	0.778967
Olfr607	10090.ENSMUSP00000041119	OL	mus	OL	receptor	0	0	0	0	1.2	0.24213	0.221033	0.778967
Olfr610	10090.ENSMUSP00000052577	OL	mus	OL	receptor	0	0	0	0	1.2	0.24213	0.221033	0.778967
Olfr47	10090.ENSMUSP00000077204	OL	mus	OL	receptor	0	0	0	0	2.5	0.34838	0.220335	0.779665
Olfr434	10090.ENSMUSP00000076039	OL	mus	OL	receptor	0	0	0	0	2.5	0.34838	0.220335	0.779665
Olfr435	10090.ENSMUSP00000058912	OL	mus	OL	receptor	0	0	0	0	2.5	0.34838	0.220335	0.779665
Olfr441	10090.ENSMUSP00000093648	OL	mus	OL	receptor	0	0	0	0	2.5	0.34838	0.220335	0.779665
Olfr444	10090.ENSMUSP00000093649	OL	mus	OL	receptor	0	0	0	0	2.5	0.34838	0.220335	0.779665
Olfr448	10090.ENSMUSP00000059195	OL	mus	OL	receptor	0	0	0	0	2.5	0.34838	0.220335	0.779665
Olfr47	10090.ENSMUSP00000077204	OL	mus	OL	receptor	0	0	0	0	2.5	0.34838	0.220335	0.779665
Olfr1026	10090.ENSMUSP00000049887	OL	mus	OL	receptor	0	0	0	0	1.5	0.26919	0.219793	0.780207
Olfr351	10090.ENSMUSP00000097727	OL	mus	OL	receptor	270	1	2711963	0.9938	1.5	0.26919	0.219793	0.780207
Olfr353	10090.ENSMUSP00000097726	OL	mus	OL	receptor	0	0	0	0	1.5	0.26919	0.219793	0.780207
Olfr1325	10090.ENSMUSP00000052441	OL	mus	OL	receptor	0	0	0	0	1.91667	0.29918	0.216102	0.783898
Olfr101	10090.ENSMUSP00000094935	OL	mus	OL	receptor	0	0	0	0	3.58824	0.40807	0.215424	0.784576
Olfr103	10090.ENSMUSP00000094934	OL	mus	OL	receptor	0	0	0	0	3.58824	0.40807	0.215424	0.784576
Olfr104	10090.ENSMUSP00000078869	OL	mus	OL	receptor	0	0	0	0	3.58824	0.40807	0.215424	0.784576
Olfr105	10090.ENSMUSP00000072951	OL	mus	OL	receptor	0	0	0	0	3.58824	0.40807	0.215424	0.784576
Olfr106	10090.ENSMUSP00000071701	OL	mus	OL	receptor	0	0	0	0	3.58824	0.40807	0.215424	0.784576
Olfr109	10090.ENSMUSP00000031086	OL	mus	OL	receptor	0	0	0	0	3.58824	0.40807	0.215424	0.784576
Olfr11	10090.ENSMUSP00000043099	OL	mus	OL	receptor	270	1	2711963	0.9938	1	0.21507	0.21507	0.78493
Olfr1305	10090.ENSMUSP00000097203	OL	mus	OL	receptor	0	0	0	0	1	0.21507	0.21507	0.78493
Olfr1336	10090.ENSMUSP00000056956	OL	mus	OL	receptor	0	0	0	0	1	0.21507	0.21507	0.78493
Olfr811	10090.ENSMUSP00000075768	OL	mus	OL	receptor	0	0	0	0	1	0.21507	0.21507	0.78493
Olfr155	10090.ENSMUSP00000092726	OL	mus	OL	receptor	0	0	0	0	1	0.21507	0.21507	0.78493
Olfr223	10090.ENSMUSP00000054824	OL	mus	OL	receptor	0	0	0	0	1	0.21507	0.21507	0.78493
Olfr356	10090.ENSMUSP00000092631	OL	mus	OL	receptor	0	0	0	0	1	0.21507	0.21507	0.78493
Olfr669	10090.ENSMUSP00000095767	OL	mus	OL	receptor	270	1	2711963	0.9938	1	0.21507	0.21507	0.78493
Olfr524	10090.ENSMUSP00000053565	OL	mus	OL	receptor	0	0	0	0	1	0.21507	0.21507	0.78493
Olfr549	10090.ENSMUSP00000095829	OL	mus	OL	receptor	0	0	0	0	1	0.21507	0.21507	0.78493
Olfr550	10090.ENSMUSP00000095828	OL	mus	OL	receptor	0	0	0	0	1	0.21507	0.21507	0.78493
Olfr669	10090.ENSMUSP00000095767	OL	mus	OL	receptor	270	1	2711963	0.9938	1	0.21507	0.21507	0.78493
Olfr676	10090.ENSMUSP00000095765	OL	mus	OL	receptor	0	0	0	0	1	0.21507	0.21507	0.78493
Olfr811	10090.ENSMUSP00000075768	OL	mus	OL	receptor	0	0	0	0	1	0.21507	0.21507	0.78493
Olfr975	10090.ENSMUSP00000059776	OL	mus	OL	receptor	0	0	0	0	1	0.21507	0.21507	0.78493
Olfr3	10090.ENSMUSP00000097728	OL	mus	OL	receptor	270	1	2711963	0.9938	3.38889	0.39436	0.214222	0.785778
Olfr338	10090.ENSMUSP00000088528	OL	mus	OL	receptor	0	0	0	0	3.38889	0.39436	0.214222	0.785778
Olfr339	10090.ENSMUSP00000071383	OL	mus	OL	receptor	0	0	0	0	3.38889	0.39436	0.214222	0.785778
Olfr340	10090.ENSMUSP00000072632	OL	mus	OL	receptor	0	0	0	0	3.38889	0.39436	0.214222	0.785778
Olfr341	10090.ENSMUSP00000097731	OL	mus	OL	receptor	0	0	0	0	3.38889	0.39436	0.214222	0.785778
Olfr342	10090.ENSMUSP00000073818	OL	mus	OL	receptor	0	0	0	0	3.38889	0.39436	0.214222	0.785778
Olfr344	10090.ENSMUSP00000074919	OL	mus	OL	receptor	0	0	0	0	3.38889	0.39436	0.214222	0.785778
Olfr345	10090.ENSMUSP00000076122	OL	mus	OL	receptor	0	0	0	0	3.38889	0.39436	0.214222	0.785778
Olfr346	10090.ENSMUSP00000077897	OL	mus	OL	receptor	0	0	0	0	3.38889	0.39436	0.214222	0.785778
Olfr348	10090.ENSMUSP00000054037	OL	mus	OL	receptor	0	0	0	0	3.38889	0.39436	0.214222	0.785778
Olfr350	10090.ENSMUSP00000053105	OL	mus	OL	receptor	270	1	2711963	0.9938	3.38889	0.39436	0.214222	0.785778
Olfr352	10090.ENSMUSP00000070758	OL	mus	OL	receptor	0	0	0	0	3.38889	0.39436	0.214222	0.785778
Olfr50	10090.ENSMUSP00000071985	OL	mus	OL	receptor	0	0	0	0	3.38889	0.39436	0.214222	0.785778
Olfr788	10090.ENSMUSP00000054710	OL	mus	OL	receptor	270	1	2711963	0.9938	2.58333	0.34311	0.213473	0.786527
Olfr803	10090.ENSMUSP00000055860	OL	mus	OL	receptor	0	0	0	0	2.58333	0.34311	0.213473	0.786527
Olfr1277	10090.ENSMUSP00000097214	OL	mus	OL	receptor	0	0	0	0	3	0.36933	0.213233	0.786767
Olfr1280	10090.ENSMUSP00000087800	OL	mus	OL	receptor	0	0	0	0	3	0.36933	0.213233	0.786767
Olfr1281	10090.ENSMUSP00000087798	OL	mus	OL	receptor	0	0	0	0	3	0.36933	0.213233	0.786767
Olfr1282	10090.ENSMUSP00000097213	OL	mus	OL	receptor	0	0	0	0	3	0.36933	0.213233	0.786767
Olfr1285	10090.ENSMUSP00000073594	OL	mus	OL	receptor	0	0	0	0	3	0.36933	0.213233	0.786767
Olfr1286	10090.ENSMUSP00000097212	OL	mus	OL	receptor	0	0	0	0	3	0.36933	0.213233	0.786767
Olfr1287	10090.ENSMUSP00000074850	OL	mus	OL	receptor	0	0	0	0	3	0.36933	0.213233	0.786767
Olfr1290	10090.ENSMUSP00000097211	OL	mus	OL	receptor	0	0	0	0	3	0.36933	0.213233	0.786767
Olfr1298	10090.ENSMUSP00000099610	OL	mus	OL	receptor	0	0	0	0	3	0.36933	0.213233	0.786767
Olfr1285	10090.ENSMUSP00000073594	OL	mus	OL	receptor	0	0	0	0	3	0.36933	0.213233	0.786767
Olfr1128	10090.ENSMUSP00000099684	OL	mus	OL	receptor	0	0	0	0	1.5	0.26017	0.212428	0.787572
Olfr1133	10090.ENSMUSP00000097441	OL	mus	OL	receptor	0	0	0	0	1.5	0.26017	0.212428	0.787572
Olfr1134	10090.ENSMUSP00000097440	OL	mus	OL	receptor	0	0	0	0	1.5	0.26017	0.212428	0.787572
Olfr654	10090.ENSMUSP00000095775	OL	mus	OL	receptor	0	0	0	0	1.5	0.26017	0.212428	0.787572
Olfr654	10090.ENSMUSP00000095775	OL	mus	OL	receptor	0	0	0	0	1.5	0.26017	0.212428	0.787572
Olfr1008	10090.ENSMUSP00000061191	OL	mus	OL	receptor	0	0	0	0	2.66667	0.34534	0.211477	0.788523
Olfr1048	10090.ENSMUSP00000097484	OL	mus	OL	receptor	0	0	0	0	2.66667	0.34534	0.211477	0.788523
Olfr1049	10090.ENSMUSP00000097483	OL	mus	OL	receptor	0	0	0	0	2.66667	0.34534	0.211477	0.788523
Olfr1051	10090.ENSMUSP00000097482	OL	mus	OL	receptor	0	0	0	0	2.66667	0.34534	0.211477	0.788523
Olfr1008	10090.ENSMUSP00000061191	OL	mus	OL	receptor	0	0	0	0	2.66667	0.34534	0.211477	0.788523
Olfr1086	10090.ENSMUSP00000097463	OL	mus	OL	receptor	270	1	2711963	0.9938	2	0.29517	0.208717	0.791283
Olfr1101	10090.ENSMUSP00000097455	OL	mus	OL	receptor	0	0	0	0	2	0.29517	0.208717	0.791283
Olfr1039	10090.ENSMUSP00000097494	OL	mus	OL	receptor	0	0	0	0	1.71429	0.27121	0.20714	0.79286
Olfr1040	10090.ENSMUSP00000097493	OL	mus	OL	receptor	0	0	0	0	1.71429	0.27121	0.20714	0.79286
Olfr1042	10090.ENSMUSP00000097492	OL	mus	OL	receptor	0	0	0	0	1.71429	0.27121	0.20714	0.79286
Olfr1043	10090.ENSMUSP00000097491	OL	mus	OL	receptor	0	0	0	0	1.71429	0.27121	0.20714	0.79286
Olfr183	10090.ENSMUSP00000080602	OL	mus	OL	receptor	0	0	0	0	3.2	0.36644	0.204846	0.795154
Olfr186	10090.ENSMUSP00000056448	OL	mus	OL	receptor	0	0	0	0	3.2	0.36644	0.204846	0.795154
Olfr187	10090.ENSMUSP00000052477	OL	mus	OL	receptor	0	0	0	0	3.2	0.36644	0.204846	0.795154
Olfr190	10090.ENSMUSP00000071224	OL	mus	OL	receptor	0	0	0	0	3.2	0.36644	0.204846	0.795154
Olfr191	10090.ENSMUSP00000077604	OL	mus	OL	receptor	0	0	0	0	3.2	0.36644	0.204846	0.795154
Olfr193	10090.ENSMUSP00000075611	OL	mus	OL	receptor	0	0	0	0	3.2	0.36644	0.204846	0.795154
Olfr196	10090.ENSMUSP00000076285	OL	mus	OL	receptor	270	1	2711963	0.9938	3.2	0.36644	0.204846	0.795154
Olfr1417	10090.ENSMUSP00000062542	OL	mus	OL	receptor	0	0	0	0	1.66667	0.26308	0.203781	0.796219
Olfr1418	10090.ENSMUSP00000078800	OL	mus	OL	receptor	0	0	0	0	1.66667	0.26308	0.203781	0.796219
Olfr702	10090.ENSMUSP00000079704	OL	mus	OL	receptor	0	0	0	0	1.66667	0.26308	0.203781	0.796219
Olfr710	10090.ENSMUSP00000062956	OL	mus	OL	receptor	0	0	0	0	1.66667	0.26308	0.203781	0.796219
Olfr1211	10090.ENSMUSP00000097396	OL	mus	OL	receptor	270	1	2711963	0.9938	2.45455	0.31909	0.20367	0.79633
Olfr1214	10090.ENSMUSP00000097392	OL	mus	OL	receptor	0	0	0	0	2.45455	0.31909	0.20367	0.79633
Olfr1215	10090.ENSMUSP00000097390	OL	mus	OL	receptor	0	0	0	0	2.45455	0.31909	0.20367	0.79633
Olfr1218	10090.ENSMUSP00000097386	OL	mus	OL	receptor	0	0	0	0	2.45455	0.31909	0.20367	0.79633
Olfr1223	10090.ENSMUSP00000097381	OL	mus	OL	receptor	0	0	0	0	2.45455	0.31909	0.20367	0.79633
Olfr1228	10090.ENSMUSP00000097377	OL	mus	OL	receptor	0	0	0	0	2.45455	0.31909	0.20367	0.79633
Olfr1223	10090.ENSMUSP00000097381	OL	mus	OL	receptor	0	0	0	0	2.45455	0.31909	0.20367	0.79633
Olfr243	10090.ENSMUSP00000095796	OL	mus	OL	receptor	0	0	0	0	4.52381	0.43317	0.20366	0.79634
Olfr68	10090.ENSMUSP00000072329	OL	mus	OL	receptor	270	1	2711963	0.9938	4.52381	0.43317	0.20366	0.79634
Olfr628	10090.ENSMUSP00000095795	OL	mus	OL	receptor	0	0	0	0	4.52381	0.43317	0.20366	0.79634
Olfr68	10090.ENSMUSP00000072329	OL	mus	OL	receptor	270	1	2711963	0.9938	4.52381	0.43317	0.20366	0.79634
Olfr69	10090.ENSMUSP00000079713	OL	mus	OL	receptor	270	1	2711963	0.9938	4.52381	0.43317	0.20366	0.79634
Olfr19	10090.ENSMUSP00000053393	OL	mus	OL	receptor	270	1	2711963	0.9938	3.15385	0.36135	0.203473	0.796527
Olfr19	10090.ENSMUSP00000053393	OL	mus	OL	receptor	270	1	2711963	0.9938	3.15385	0.36135	0.203473	0.796527
Olfr57	10090.ENSMUSP00000080872	OL	mus	OL	receptor	0	0	0	0	3.15385	0.36135	0.203473	0.796527
Olfr1501	10090.ENSMUSP00000073620	OL	mus	OL	receptor	0	0	0	0	1.4	0.24044	0.203209	0.796791
Olfr1504	10090.ENSMUSP00000077400	OL	mus	OL	receptor	0	0	0	0	1.4	0.24044	0.203209	0.796791
Olfr1507	10090.ENSMUSP00000073260	OL	mus	OL	receptor	0	0	0	0	1.4	0.24044	0.203209	0.796791
Olfr1508	10090.ENSMUSP00000077128	OL	mus	OL	receptor	270	1	2711963	0.9938	1.4	0.24044	0.203209	0.796791
Olfr1164	10090.ENSMUSP00000097422	OL	mus	OL	receptor	0	0	0	0	3	0.35118	0.202754	0.797246
Olfr1166	10090.ENSMUSP00000097421	OL	mus	OL	receptor	0	0	0	0	3	0.35118	0.202754	0.797246
Olfr1167	10090.ENSMUSP00000097420	OL	mus	OL	receptor	0	0	0	0	3	0.35118	0.202754	0.797246
Olfr1168	10090.ENSMUSP00000078549	OL	mus	OL	receptor	0	0	0	0	3	0.35118	0.202754	0.797246
Olfr1170	10090.ENSMUSP00000097419	OL	mus	OL	receptor	0	0	0	0	3	0.35118	0.202754	0.797246
Olfr1173	10090.ENSMUSP00000097418	OL	mus	OL	receptor	0	0	0	0	3	0.35118	0.202754	0.797246
Olfr1176	10090.ENSMUSP00000053353	OL	mus	OL	receptor	0	0	0	0	3	0.35118	0.202754	0.797246
Olfr1170	10090.ENSMUSP00000097419	OL	mus	OL	receptor	0	0	0	0	3	0.35118	0.202754	0.797246
Olfr1120	10090.ENSMUSP00000051931	OL	mus	OL	receptor	0	0	0	0	4.10526	0.40882	0.201772	0.798228
Olfr1121	10090.ENSMUSP00000058201	OL	mus	OL	receptor	0	0	0	0	4.10526	0.40882	0.201772	0.798228
Olfr1122	10090.ENSMUSP00000052190	OL	mus	OL	receptor	0	0	0	0	4.10526	0.40882	0.201772	0.798228
Olfr1123	10090.ENSMUSP00000058786	OL	mus	OL	receptor	270	1	2711963	0.9938	4.10526	0.40882	0.201772	0.798228
Olfr1126	10090.ENSMUSP00000071313	OL	mus	OL	receptor	0	0	0	0	4.10526	0.40882	0.201772	0.798228
Olfr1129	10090.ENSMUSP00000079823	OL	mus	OL	receptor	0	0	0	0	4.10526	0.40882	0.201772	0.798228
Olfr1130	10090.ENSMUSP00000078649	OL	mus	OL	receptor	0	0	0	0	4.10526	0.40882	0.201772	0.798228
Olfr1145	10090.ENSMUSP00000088209	OL	mus	OL	receptor	0	0	0	0	4.10526	0.40882	0.201772	0.798228
Olfr1148	10090.ENSMUSP00000076778	OL	mus	OL	receptor	0	0	0	0	4.10526	0.40882	0.201772	0.798228
Olfr33	10090.ENSMUSP00000081877	OL	mus	OL	receptor	0	0	0	0	2	0.2845	0.201172	0.798828
Olfr559	10090.ENSMUSP00000095820	OL	mus	OL	receptor	0	0	0	0	2	0.2845	0.201172	0.798828
Olfr63	10090.ENSMUSP00000067207	OL	mus	OL	receptor	270	1	2711963	0.9938	2.33333	0.30711	0.201051	0.798949
Olfr586	10090.ENSMUSP00000081872	OL	mus	OL	receptor	0	0	0	0	2.27273	0.30128	0.199846	0.800154
Olfr1186	10090.ENSMUSP00000074542	OL	mus	OL	receptor	0	0	0	0	4.14286	0.4023	0.197651	0.802349
Olfr1195	10090.ENSMUSP00000097406	OL	mus	OL	receptor	0	0	0	0	4.14286	0.4023	0.197651	0.802349
Olfr1201	10090.ENSMUSP00000073163	OL	mus	OL	receptor	0	0	0	0	4.14286	0.4023	0.197651	0.802349
Olfr1209	10090.ENSMUSP00000097397	OL	mus	OL	receptor	270	1	2711963	0.9938	4.14286	0.4023	0.197651	0.802349
Olfr178	10090.ENSMUSP00000049578	OL	mus	OL	receptor	0	0	0	0	1.66667	0.25496	0.197491	0.802509
Olfr180	10090.ENSMUSP00000093688	OL	mus	OL	receptor	0	0	0	0	1.66667	0.25496	0.197491	0.802509
Olfr181	10090.ENSMUSP00000074825	OL	mus	OL	receptor	0	0	0	0	1.66667	0.25496	0.197491	0.802509
Olfr166	10090.ENSMUSP00000074299	OL	mus	OL	receptor	270	1	2711963	0.9938	4.78947	0.422	0.192827	0.807173
Olfr167	10090.ENSMUSP00000055344	OL	mus	OL	receptor	270	1	2711963	0.9938	4.78947	0.422	0.192827	0.807173
Olfr168	10090.ENSMUSP00000077632	OL	mus	OL	receptor	270	1	2711963	0.9938	4.78947	0.422	0.192827	0.807173
Olfr332	10090.ENSMUSP00000063076	OL	mus	OL	receptor	0	0	0	0	4.78947	0.422	0.192827	0.807173
Olfr1352	10090.ENSMUSP00000054355	OL	mus	OL	receptor	0	0	0	0	5.28571	0.44183	0.192178	0.807822
Olfr1351	10090.ENSMUSP00000079555	OL	mus	OL	receptor	0	0	0	0	5.28571	0.44183	0.192178	0.807822
Olfr1352	10090.ENSMUSP00000054355	OL	mus	OL	receptor	0	0	0	0	5.28571	0.44183	0.192178	0.807822
Olfr1354	10090.ENSMUSP00000093126	OL	mus	OL	receptor	0	0	0	0	5.28571	0.44183	0.192178	0.807822
Olfr1378	10090.ENSMUSP00000058119	OL	mus	OL	receptor	0	0	0	0	5.28571	0.44183	0.192178	0.807822
Olfr39	10090.ENSMUSP00000071641	OL	mus	OL	receptor	270	1	2711963	0.9938	5.28571	0.44183	0.192178	0.807822
Olfr1351	10090.ENSMUSP00000079555	OL	mus	OL	receptor	0	0	0	0	5.28571	0.44183	0.192178	0.807822
Olfr77	10090.ENSMUSP00000058810	OL	mus	OL	receptor	0	0	0	0	5.28571	0.44183	0.192178	0.807822
Olfr867	10090.ENSMUSP00000057469	OL	mus	OL	receptor	0	0	0	0	5.28571	0.44183	0.192178	0.807822
Olfr533	10090.ENSMUSP00000071667	OL	mus	OL	receptor	0	0	0	0	3.25	0.3444	0.191039	0.808961
Olfr211	10090.ENSMUSP00000066524	OL	mus	OL	receptor	0	0	0	0	3.25	0.3444	0.191039	0.808961
Olfr45	10090.ENSMUSP00000081492	OL	mus	OL	receptor	0	0	0	0	3.25	0.3444	0.191039	0.808961
Olfr46	10090.ENSMUSP00000072445	OL	mus	OL	receptor	0	0	0	0	3.25	0.3444	0.191039	0.808961
Olfr53	10090.ENSMUSP00000081493	OL	mus	OL	receptor	0	0	0	0	3.25	0.3444	0.191039	0.808961
Olfr533	10090.ENSMUSP00000071667	OL	mus	OL	receptor	0	0	0	0	3.25	0.3444	0.191039	0.808961
Olfr535	10090.ENSMUSP00000074435	OL	mus	OL	receptor	0	0	0	0	3.25	0.3444	0.191039	0.808961
Olfr538	10090.ENSMUSP00000081495	OL	mus	OL	receptor	0	0	0	0	3.25	0.3444	0.191039	0.808961
Olfr539	10090.ENSMUSP00000077990	OL	mus	OL	receptor	0	0	0	0	3.25	0.3444	0.191039	0.808961
Olfr541	10090.ENSMUSP00000079508	OL	mus	OL	receptor	0	0	0	0	3.25	0.3444	0.191039	0.808961
Olfr60	10090.ENSMUSP00000074916	OL	mus	OL	receptor	0	0	0	0	3.25	0.3444	0.191039	0.808961
Olfr61	10090.ENSMUSP00000081494	OL	mus	OL	receptor	0	0	0	0	3.25	0.3444	0.191039	0.808961
Olfr608	10090.ENSMUSP00000095801	OL	mus	OL	receptor	0	0	0	0	2.375	0.29256	0.189838	0.810162
Olfr622	10090.ENSMUSP00000058312	OL	mus	OL	receptor	0	0	0	0	2.375	0.29256	0.189838	0.810162
Olfr629	10090.ENSMUSP00000052662	OL	mus	OL	receptor	0	0	0	0	2.375	0.29256	0.189838	0.810162
Olfr593	10090.ENSMUSP00000095807	OL	mus	OL	receptor	0	0	0	0	2.375	0.29143	0.189105	0.810895
Olfr148	10090.ENSMUSP00000096473	OL	mus	OL	receptor	0	0	0	0	1.83333	0.2547	0.188109	0.811891
Olfr1183	10090.ENSMUSP00000099678	OL	mus	OL	receptor	0	0	0	0	2.25	0.27871	0.185807	0.814193
Olfr314	10090.ENSMUSP00000075729	OL	mus	OL	receptor	270	1	2711963	0.9938	3.57143	0.35016	0.185287	0.814713
Olfr314	10090.ENSMUSP00000075729	OL	mus	OL	receptor	270	1	2711963	0.9938	3.57143	0.35016	0.185287	0.814713
Olfr315	10090.ENSMUSP00000080248	OL	mus	OL	receptor	0	0	0	0	3.57143	0.35016	0.185287	0.814713
Olfr543	10090.ENSMUSP00000051348	OL	mus	OL	receptor	270	1	2711963	0.9938	1.25	0.20668	0.18486	0.81514
Olfr544	10090.ENSMUSP00000051280	OL	mus	OL	receptor	270	1	2711963	0.9938	1.25	0.20668	0.18486	0.81514
Olfr545	10090.ENSMUSP00000052396	OL	mus	OL	receptor	270	1	2711963	0.9938	1.25	0.20668	0.18486	0.81514
Olfr597	10090.ENSMUSP00000095804	OL	mus	OL	receptor	0	0	0	0	1.25	0.20668	0.18486	0.81514
Olfr639	10090.ENSMUSP00000081860	OL	mus	OL	receptor	0	0	0	0	1.25	0.20668	0.18486	0.81514
Olfr922	10090.ENSMUSP00000057086	OL	mus	OL	receptor	0	0	0	0	1.25	0.20668	0.18486	0.81514
Olfr649	10090.ENSMUSP00000050903	OL	mus	OL	receptor	0	0	0	0	1.6	0.23181	0.183262	0.816738
Olfr649	10090.ENSMUSP00000050903	OL	mus	OL	receptor	0	0	0	0	1.6	0.23181	0.183262	0.816738
Olfr119	10090.ENSMUSP00000092919	OL	mus	OL	receptor	0	0	0	0	2.44444	0.28444	0.181929	0.818071
Olfr120	10090.ENSMUSP00000094931	OL	mus	OL	receptor	0	0	0	0	2.44444	0.28444	0.181929	0.818071
Olfr121	10090.ENSMUSP00000084377	OL	mus	OL	receptor	0	0	0	0	2.44444	0.28444	0.181929	0.818071
Olfr1480	10090.ENSMUSP00000072076	OL	mus	OL	receptor	0	0	0	0	5.2	0.41424	0.181656	0.818344
Olfr1442	10090.ENSMUSP00000050632	OL	mus	OL	receptor	0	0	0	0	5.2	0.41424	0.181656	0.818344
Olfr1443	10090.ENSMUSP00000059886	OL	mus	OL	receptor	0	0	0	0	5.2	0.41424	0.181656	0.818344
Olfr1445	10090.ENSMUSP00000058933	OL	mus	OL	receptor	270	1	2711963	0.9938	5.2	0.41424	0.181656	0.818344
[truncated: 1,932 more rows]
