# Supplementary material for: Differential Evolutionary Constraints in the Evolution of Chemoreceptors: A Murine and Human Case Study
Source: ScientificWorldJournal. 2014 Jan 23;2014:696485. doi: 10.1155/2014/696485 (PMC3920627; doi:10.1155/2014/696485)
Supplement: Supplementary file 1 — This supplementary material contains: 1) A summary of all genes used in our analyses, with their respective orthology and topology information 2) The tree files used to generate Figure 6 Please refer to the readme file further information. [file 696485.f1.zip › Supplementary readme.txt]

OR_tree.mts	Olfactory receptors tree	(100 bootstrap permutations)				Open with MEGA 5.2

T1R_tree.mts	Type I taste receptors		(100 bootstrap permutations)				Open with MEGA 5.2

T2R_tree.mts	Type II taste receptors		(100 bootstrap permutations)				Open with MEGA 5.2

VN_tree.mts	Vomeronasal I and II receptors	(100 bootstrap permutations)				Open with MEGA 5.2

Supplementary 1 - Genes.xlsx	All genes used in our analyses with topology and orthology information	Open with Microsoft Excel 2010
